# Supplementary material for: Transcriptomic and proteomic profiling reveal immune and metabolic dysregulation in the colonic mucosa of people living with HIV with incomplete immune recovery
Source: Front Immunol. 2025 Sep 17;16:1635523. doi: 10.3389/fimmu.2025.1635523 (PMC12484174; doi:10.3389/fimmu.2025.1635523)
Supplement: Supplementary file 4 [file Table1.xlsx]

## Sheet: SI INR_vs_IR
Id	short_name	description	INR	nonINR	FoldChange	log2FoldChange	pvalue	padj
ENSG00000270244	AC104687.2		10	1	7.24507	2.857	0.000395334	0.00440897
ENSG00000179873	NLRP11	NLR family pyrin domain containing 11	15	3	5.88075	2.556	0.00412414	0.0269938
ENSG00000271964	AC090948.1		19	4	4.76343	2.252	2.69e-05	0.000491634
ENSG00000274191	AC026333.4		17	4	4.31093	2.108	0.000968985	0.00913794
ENSG00000182050	MGAT4C	MGAT4 family member C	12	3	4.01667	2.006	0.00946358	0.04989
ENSG00000170745	KCNS3	potassium voltage-gated channel modifier subfamily S member 3	282	74	3.80264	1.927	2.03e-06	6.08e-05
ENSG00000211753	TRBV28	T-cell receptor beta variable 28	30	8	3.73213	1.9	0.00755645	0.042441
ENSG00000236711	SMAD9-IT1	SMAD9 intronic transcript 1	20	6	3.43664	1.781	0.000603857	0.00623038
ENSG00000155511	GRIA1	glutamate ionotropic receptor AMPA type subunit 1	18	5	3.34499	1.742	0.00829148	0.0455237
ENSG00000177990	DPY19L2	dpy-19 like 2	26	8	3.18435	1.671	0.000623861	0.00640857
ENSG00000073734	ABCB11	ATP binding cassette subfamily B member 11	452	149	3.03985	1.604	2.88e-06	8.13e-05
ENSG00000283422	LINC02452	long intergenic non-protein coding RNA 2452	20	6	2.95058	1.561	0.00153613	0.0129438
ENSG00000154736	ADAMTS5	ADAM metallopeptidase with thrombospondin type 1 motif 5	85	30	2.87388	1.523	0.00024716	0.00299956
ENSG00000225762	LINC01389	long intergenic non-protein coding RNA 1389	26	9	2.70195	1.434	0.000678031	0.00684111
ENSG00000189292	ALKAL2	ALK and LTK ligand 2	78	30	2.65921	1.411	6.52e-05	0.00100067
ENSG00000223561	AC005165.1		29	11	2.64634	1.404	0.00130667	0.0113655
ENSG00000123570	RAB9B	RAB9B, member RAS oncogene family	36	14	2.64634	1.404	0.000330367	0.00379336
ENSG00000228886	AL138963.1		26	11	2.47598	1.308	0.00305848	0.0218163
ENSG00000079156	OSBPL6	oxysterol binding protein like 6	65	26	2.46913	1.304	0.000504756	0.00537846
ENSG00000189013	KIR2DL4	killer cell immunoglobulin like receptor, two Ig domains and long cytoplasmic tail 4	36	15	2.40994	1.269	0.00772438	0.0431834
ENSG00000144057	ST6GAL2	ST6 beta-galactoside alpha-2,6-sialyltransferase 2	53	22	2.40994	1.269	0.00418608	0.027297
ENSG00000163739	CXCL1	C-X-C motif chemokine ligand 1	65	27	2.38667	1.255	0.00196967	0.0156534
ENSG00000185002	RFX6	regulatory factor X6	26	11	2.3473	1.231	0.00226535	0.0173866
ENSG00000146151	HMGCLL1	3-hydroxymethyl-3-methylglutaryl-CoA lyase like 1	15	6	2.31498	1.211	0.00932829	0.0494124
ENSG00000147588	PMP2	peripheral myelin protein 2	16	7	2.29899	1.201	0.00586149	0.0351287
ENSG00000206538	VGLL3	vestigial like family member 3	24	10	2.28786	1.194	0.00885198	0.0475992
ENSG00000170323	FABP4	fatty acid binding protein 4	68	30	2.28311	1.191	0.00536127	0.0327944
ENSG00000267107	PCAT19	prostate cancer associated transcript 19 (non-protein coding)	25	11	2.27206	1.184	0.00338307	0.0234986
ENSG00000081818	PCDHB4	protocadherin beta 4	21	9	2.26734	1.181	0.00450683	0.0288081
ENSG00000257194	AC126178.1		33	15	2.26734	1.181	0.000827132	0.00803053
ENSG00000172201	ID4	inhibitor of DNA binding 4, HLH protein	141	64	2.20687	1.142	0.00790018	0.0439313
ENSG00000198574	SH2D1B	SH2 domain containing 1B	46	21	2.20228	1.139	0.0070244	0.0402883
ENSG00000129167	TPH1	tryptophan hydroxylase 1	620	282	2.20228	1.139	2.81e-07	1.23e-05
ENSG00000145777	TSLP	thymic stromal lymphopoietin	56	26	2.18859	1.13	0.00695192	0.0399512
ENSG00000184838	PRR16	proline rich 16	36	16	2.15995	1.111	0.0036358	0.0246754
ENSG00000182263	FIGN	fidgetin, microtubule severing factor	39	18	2.14652	1.102	0.00466262	0.029618
ENSG00000060709	RIMBP2	RIMS binding protein 2	44	21	2.13613	1.095	0.00117246	0.0104755
ENSG00000152402	GUCY1A2	guanylate cyclase 1 soluble subunit alpha 2	30	14	2.13169	1.092	0.00244509	0.0184103
ENSG00000113327	GABRG2	gamma-aminobutyric acid type A receptor gamma2 subunit	33	16	2.12285	1.086	0.00755413	0.042441
ENSG00000173404	INSM1	INSM transcriptional repressor 1	54	25	2.12285	1.086	0.00163045	0.0135619
ENSG00000184368	MAP7D2	MAP7 domain containing 2	71	34	2.07484	1.053	1.92e-05	0.000371218
ENSG00000275854	AC084824.4		31	15	2.02792	1.02	0.00414547	0.0271131
ENSG00000134539	KLRD1	killer cell lectin like receptor D1	266	131	2.02792	1.02	7.61e-06	0.000173197
ENSG00000177465	ACOT4	acyl-CoA thioesterase 4	91	45	2.0167	1.012	0.0019341	0.0154551
ENSG00000123560	PLP1	proteolipid protein 1	179	89	2.0167	1.012	7.4e-05	0.00111331
ENSG00000113356	POLR3G	RNA polymerase III subunit G	43	22	1.9917	0.994	0.00530751	0.032591
ENSG00000170419	VSTM2A	V-set and transmembrane domain containing 2A	122	61	1.9917	0.994	5.78e-07	2.18e-05
ENSG00000272604	AC073073.2		35	18	1.98481	0.989	0.0050969	0.03171
ENSG00000179915	NRXN1	neurexin 1	85	43	1.9602	0.971	0.000866055	0.00835274
ENSG00000134830	C5AR2	complement component 5a receptor 2	44	22	1.94531	0.96	0.0051049	0.0317309
ENSG00000164659	KIAA1324L	KIAA1324 like	404	209	1.93858	0.955	0.000737807	0.00727254
ENSG00000119938	PPP1R3C	protein phosphatase 1 regulatory subunit 3C	62	33	1.91587	0.938	0.00870157	0.0469783
ENSG00000196345	ZKSCAN7	zinc finger with KRAB and SCAN domains 7	52	27	1.90792	0.932	0.00194712	0.0155236
ENSG00000229692	SOS1-IT1	SOS1 intronic transcript 1	49	26	1.90792	0.932	0.00184001	0.014865
ENSG00000260686	AC008669.1		66	34	1.90792	0.932	0.00111641	0.0100986
ENSG00000019991	HGF	hepatocyte growth factor	100	54	1.87644	0.908	0.00665531	0.038551
ENSG00000232973	CYP1B1-AS1	CYP1B1 antisense RNA 1	62	33	1.87254	0.905	0.00430107	0.0277671
ENSG00000166741	NNMT	nicotinamide N-methyltransferase	165	88	1.85832	0.894	0.00706226	0.0404523
ENSG00000165124	SVEP1	sushi, von Willebrand factor type A, EGF and pentraxin domain containing 1	158	86	1.85575	0.892	0.00136411	0.0117667
ENSG00000260197	AC010889.1		57	31	1.85575	0.892	0.00121131	0.0107238
ENSG00000261061	AC092718.4		64	35	1.84165	0.881	0.00341485	0.0236442
ENSG00000152766	ANKRD22	ankyrin repeat domain 22	620	338	1.83528	0.876	0.00195207	0.0155419
ENSG00000280099	AL603750.1		65	36	1.83528	0.876	0.00140082	0.0119769
ENSG00000184564	SLITRK6	SLIT and NTRK like family member 6	541	295	1.83147	0.873	6.41e-09	5.8e-07
ENSG00000187391	MAGI2	membrane associated guanylate kinase, WW and PDZ domain containing 2	90	49	1.82513	0.868	0.000831551	0.00806
ENSG00000144366	GULP1	GULP, engulfment adaptor PTB domain containing 1	358	197	1.81756	0.862	0.0019309	0.0154366
ENSG00000141052	MYOCD	myocardin	114	64	1.805	0.852	0.00318321	0.0224404
ENSG00000260742	AC009962.1		37	20	1.79876	0.847	0.00877158	0.0472244
ENSG00000149534	MS4A2	membrane spanning 4-domains A2	201	112	1.79876	0.847	0.00688031	0.0396179
ENSG00000103196	CRISPLD2	cysteine rich secretory protein LCCL domain containing 2	493	275	1.79253	0.842	0.00199615	0.0157978
ENSG00000178726	THBD	thrombomodulin	92	52	1.77892	0.831	0.000483524	0.00519365
ENSG00000116717	GADD45A	growth arrest and DNA damage inducible alpha	306	172	1.77892	0.831	1.68e-05	0.000333878
ENSG00000120156	TEK	TEK receptor tyrosine kinase	114	64	1.77645	0.829	0.000612134	0.00630758
ENSG00000172318	B3GALT1	beta-1,3-galactosyltransferase 1	585	331	1.77031	0.824	6.28e-05	0.000968797
ENSG00000260766	AL513302.2		116	65	1.76663	0.821	0.00187634	0.0151088
ENSG00000138678	GPAT3	glycerol-3-phosphate acyltransferase 3	1310	749	1.74836	0.806	0.000415922	0.00459113
ENSG00000004799	PDK4	pyruvate dehydrogenase kinase 4	1815	1044	1.73869	0.798	0.00510752	0.0317309
ENSG00000260966	AP001486.2		40	23	1.73027	0.791	0.00767336	0.0429256
ENSG00000125257	ABCC4	ATP binding cassette subfamily C member 4	673	389	1.73027	0.791	0.00657078	0.0382006
ENSG00000154262	ABCA6	ATP binding cassette subfamily A member 6	82	48	1.72429	0.786	0.00405285	0.0266771
ENSG00000164035	EMCN	endomucin	80	47	1.71475	0.778	0.00355245	0.024251
ENSG00000165501	LRR1	leucine rich repeat protein 1	388	227	1.70409	0.769	0.0012238	0.0108125
ENSG00000145649	GZMA	granzyme A	459	270	1.69819	0.764	0.00529162	0.032553
ENSG00000097096	SYDE2	synapse defective Rho GTPase homolog 2	150	89	1.69819	0.764	0.0051296	0.0318174
ENSG00000105784	RUNDC3B	RUN domain containing 3B	296	176	1.68063	0.749	0.00348245	0.0239133
ENSG00000171848	RRM2	ribonucleotide reductase regulatory subunit M2	766	455	1.68063	0.749	0.00317228	0.0223852
ENSG00000166292	TMEM100	transmembrane protein 100	140	83	1.68063	0.749	0.00236793	0.0179351
ENSG00000156535	CD109	CD109 molecule	109	65	1.68063	0.749	0.00082445	0.00800894
ENSG00000141338	ABCA8	ATP binding cassette subfamily A member 8	662	394	1.6783	0.747	0.00409572	0.0268681
ENSG00000134121	CHL1	cell adhesion molecule L1 like	242	145	1.67249	0.742	0.000982926	0.00921579
ENSG00000121690	DEPDC7	DEP domain containing 7	231	139	1.66902	0.739	0.00161159	0.0134435
ENSG00000242779	ZNF702P	zinc finger protein 702, pseudogene	192	116	1.65864	0.73	0.00564667	0.0341091
ENSG00000277161	PIGW	phosphatidylinositol glycan anchor biosynthesis class W	232	141	1.64718	0.72	0.00751013	0.0423105
ENSG00000102038	SMARCA1	SWI/SNF related, matrix associated, actin dependent regulator of chromatin, subfamily a, member 1	108	66	1.64718	0.72	0.00227814	0.0174388
ENSG00000039560	RAI14	retinoic acid induced 14	350	213	1.64148	0.715	0.00472225	0.0298899
ENSG00000087053	MTMR2	myotubularin related protein 2	1007	613	1.64148	0.715	0.000231869	0.00284961
ENSG00000223509	AC135983.2		217	132	1.63921	0.713	0.00122816	0.0108223
ENSG00000272335	AC093297.3		256	156	1.63694	0.711	0.00011718	0.00163174
ENSG00000091127	PUS7	pseudouridylate synthase 7 (putative)	260	159	1.63354	0.708	0.00257839	0.0192238
ENSG00000272851	AC096772.1		185	113	1.63127	0.706	0.00684931	0.0395175
ENSG00000278192	AL118505.1		133	81	1.62902	0.704	0.0016364	0.0135856
ENSG00000141428	C18orf21	chromosome 18 open reading frame 21	184	113	1.62338	0.699	0.000638512	0.0065217
ENSG00000157404	KIT	KIT proto-oncogene receptor tyrosine kinase	474	292	1.62113	0.697	0.00755759	0.042441
ENSG00000134242	PTPN22	protein tyrosine phosphatase, non-receptor type 22	327	202	1.62113	0.697	0.00154142	0.0129758
ENSG00000260196	AC124798.1		182	113	1.61328	0.69	0.00387361	0.0258675
ENSG00000031691	CENPQ	centromere protein Q	123	76	1.61328	0.69	0.00326283	0.0228214
ENSG00000113966	ARL6	ADP ribosylation factor like GTPase 6	94	59	1.6077	0.685	0.00184536	0.0148889
ENSG00000112414	ADGRG6	adhesion G protein-coupled receptor G6	431	268	1.60547	0.683	0.00168677	0.0139113
ENSG00000068366	ACSL4	acyl-CoA synthetase long chain family member 4	715	447	1.60214	0.68	0.00395577	0.0262258
ENSG00000116874	WARS2	tryptophanyl tRNA synthetase 2, mitochondrial	296	186	1.5977	0.676	0.00158281	0.0132482
ENSG00000124813	RUNX2	runt related transcription factor 2	245	154	1.59438	0.673	0.00951221	0.0499806
ENSG00000163138	PACRGL	parkin coregulated like	196	123	1.58997	0.669	8.06e-05	0.00120132
ENSG00000070785	EIF2B3	eukaryotic translation initiation factor 2B subunit gamma	296	185	1.58997	0.669	4.27e-05	0.000714279
ENSG00000043514	TRIT1	tRNA isopentenyltransferase 1	330	208	1.58997	0.669	1.17e-06	3.96e-05
ENSG00000251022	THAP9-AS1	THAP9 antisense RNA 1	731	460	1.58777	0.667	0.000686535	0.0068993
ENSG00000122870	BICC1	BicC family RNA binding protein 1	123	77	1.58447	0.664	0.00274774	0.0201256
ENSG00000181458	TMEM45A	transmembrane protein 45A	118	74	1.58227	0.662	0.00541958	0.0330009
ENSG00000212907	MT-ND4L	mitochondrially encoded NADH:ubiquinone oxidoreductase core subunit 4L	176180	111461	1.58008	0.66	0.00571007	0.0343745
ENSG00000164070	HSPA4L	heat shock protein family A (Hsp70) member 4 like	158	99	1.5768	0.657	0.00905687	0.048403
ENSG00000133657	ATP13A3	ATPase 13A3	2930	1857	1.5768	0.657	0.000447153	0.00487019
ENSG00000011260	UTP18	UTP18, small subunit processome component	426	271	1.57243	0.653	1.36e-05	0.000280243
ENSG00000163636	PSMD6	proteasome 26S subunit, non-ATPase 6	845	538	1.57026	0.651	4.59e-05	0.000754972
ENSG00000133110	POSTN	periostin	2074	1322	1.56699	0.648	0.00291669	0.0210803
ENSG00000196284	SUPT3H	SPT3 homolog, SAGA and STAGA complex component	67	43	1.56482	0.646	0.00835412	0.045767
ENSG00000187607	ZNF286A	zinc finger protein 286A	76	49	1.55725	0.639	0.00434942	0.0279973
ENSG00000188342	GTF2F2	general transcription factor IIF subunit 2	544	349	1.55725	0.639	0.000133239	0.00180643
ENSG00000173218	VANGL1	VANGL planar cell polarity protein 1	490	315	1.55509	0.637	0.00812022	0.0448511
ENSG00000122644	ARL4A	ADP ribosylation factor like GTPase 4A	1446	929	1.55509	0.637	0.00226938	0.0173897
ENSG00000070961	ATP2B1	ATPase plasma membrane Ca2+ transporting 1	3730	2401	1.55294	0.635	0.000903911	0.00865576
ENSG00000136143	SUCLA2	succinate-CoA ligase ADP-forming beta subunit	1343	866	1.55079	0.633	0.00597983	0.0356181
ENSG00000145681	HAPLN1	hyaluronan and proteoglycan link protein 1	364	234	1.55079	0.633	0.00429056	0.0277197
ENSG00000145632	PLK2	polo like kinase 2	272	175	1.54756	0.63	0.00605767	0.0359836
ENSG00000197619	ZNF615	zinc finger protein 615	161	104	1.54756	0.63	0.00417582	0.0272504
ENSG00000120705	ETF1	eukaryotic translation termination factor 1	2847	1838	1.54756	0.63	3.37e-05	0.000583982
ENSG00000163072	NOSTRIN	nitric oxide synthase trafficking	938	606	1.54756	0.63	3.2e-05	0.000560367
ENSG00000276900	AC023157.3		76	49	1.54328	0.626	0.00903919	0.0483233
ENSG00000143797	MBOAT2	membrane bound O-acyltransferase domain containing 2	1213	786	1.54114	0.624	0.00365961	0.0247889
ENSG00000046889	PREX2	phosphatidylinositol-3,4,5-trisphosphate dependent Rac exchange factor 2	107	69	1.54114	0.624	0.00312979	0.0221711
ENSG00000186625	KATNA1	katanin catalytic subunit A1	244	158	1.54114	0.624	0.00137207	0.0118236
ENSG00000006634	DBF4	DBF4 zinc finger	325	211	1.53794	0.621	0.00529473	0.0325583
ENSG00000162407	PLPP3	phospholipid phosphatase 3	680	442	1.53794	0.621	0.00299714	0.0214929
ENSG00000069702	TGFBR3	transforming growth factor beta receptor 3	220	143	1.53581	0.619	0.00428044	0.0276825
ENSG00000163430	FSTL1	follistatin like 1	1064	695	1.53368	0.617	0.00167194	0.0138281
ENSG00000130962	PRRG1	proline rich and Gla domain 1	237	155	1.53156	0.615	0.0050478	0.031483
ENSG00000144619	CNTN4	contactin 4	284	186	1.53156	0.615	0.00232169	0.0176869
ENSG00000121073	SLC35B1	solute carrier family 35 member B1	634	413	1.53156	0.615	0.00225046	0.017318
ENSG00000186314	PRELID2	PRELI domain containing 2	775	506	1.53156	0.615	0.0013577	0.0117287
ENSG00000189184	PCDH18	protocadherin 18	547	358	1.52944	0.613	0.00470344	0.0298015
ENSG00000128059	PPAT	phosphoribosyl pyrophosphate amidotransferase	210	138	1.52944	0.613	0.00316649	0.0223586
ENSG00000228253	MT-ATP8	mitochondrially encoded ATP synthase 8	39198	25644	1.52944	0.613	0.000614224	0.00632539
ENSG00000080345	RIF1	replication timing regulatory factor 1	1116	730	1.52944	0.613	0.000403303	0.004475
ENSG00000140905	GCSH	glycine cleavage system protein H	276	181	1.52203	0.606	0.0060779	0.0360743
ENSG00000120438	TCP1	t-complex 1	3886	2554	1.52203	0.606	0.00112114	0.0101209
ENSG00000146731	CCT6A	chaperonin containing TCP1 subunit 6A	2974	1952	1.52203	0.606	4.38e-05	0.000726811
ENSG00000023572	GLRX2	glutaredoxin 2	104	68	1.51992	0.604	0.00651231	0.037968
ENSG00000141076	UTP4	UTP4, small subunit processome component	388	255	1.51992	0.604	0.00128994	0.0112434
ENSG00000129084	PSMA1	proteasome subunit alpha 1	441	290	1.51992	0.604	6.76e-05	0.00102917
ENSG00000164176	EDIL3	EGF like repeats and discoidin domains 3	2677	1765	1.51782	0.602	0.00115741	0.0103801
ENSG00000038427	VCAN	versican	581	384	1.51467	0.599	0.00444371	0.0284671
ENSG00000170142	UBE2E1	ubiquitin conjugating enzyme E2 E1	4490	2964	1.51467	0.599	0.00104294	0.00961304
ENSG00000012983	MAP4K5	mitogen-activated protein kinase kinase kinase kinase 5	1038	685	1.51467	0.599	4.73e-05	0.000775067
ENSG00000182512	GLRX5	glutaredoxin 5	796	525	1.51257	0.597	9.04e-05	0.00131995
ENSG00000137692	DCUN1D5	defective in cullin neddylation 1 domain containing 5	180	119	1.51047	0.595	0.00620635	0.0366303
ENSG00000237289	CKMT1B	creatine kinase, mitochondrial 1B	1262	835	1.51047	0.595	0.00349357	0.0239614
ENSG00000100523	DDHD1	DDHD domain containing 1	401	266	1.51047	0.595	0.000113059	0.00158446
ENSG00000276855	AC015922.4		119	79	1.50838	0.593	0.00271259	0.0199853
ENSG00000147676	MAL2	mal, T-cell differentiation protein 2 (gene/pseudogene)	10366	6881	1.50629	0.591	0.00652952	0.0380366
ENSG00000115946	PNO1	partner of NOB1 homolog	234	155	1.5042	0.589	0.00135675	0.0117263
ENSG00000259071	AL359397.2		204	135	1.5042	0.589	0.000352644	0.00401486
ENSG00000165030	NFIL3	nuclear factor, interleukin 3 regulated	426	283	1.50108	0.586	0.00428321	0.0276825
ENSG00000109814	UGDH	UDP-glucose 6-dehydrogenase	7306	4862	1.50108	0.586	0.00179116	0.0145389
ENSG00000125845	BMP2	bone morphogenetic protein 2	786	523	1.50108	0.586	0.00106707	0.00976852
ENSG00000113580	NR3C1	nuclear receptor subfamily 3 group C member 1	746	498	1.50108	0.586	2.81e-06	7.94e-05
ENSG00000188738	FSIP2	fibrous sheath interacting protein 2	1355	903	1.499	0.584	0.00136035	0.01174
ENSG00000023909	GCLM	glutamate-cysteine ligase modifier subunit	668	446	1.49692	0.582	0.00516408	0.0320026
ENSG00000165637	VDAC2	voltage dependent anion channel 2	5267	3522	1.49485	0.58	0.000353847	0.00402593
ENSG00000186432	KPNA4	karyopherin subunit alpha 4	1938	1296	1.49485	0.58	0.000104039	0.00148909
ENSG00000087448	KLHL42	kelch like family member 42	718	482	1.49278	0.578	0.00170868	0.0140061
ENSG00000162664	ZNF326	zinc finger protein 326	2703	1812	1.49278	0.578	0.000565576	0.00590087
ENSG00000138814	PPP3CA	protein phosphatase 3 catalytic subunit alpha	1242	832	1.49278	0.578	0.000248438	0.00301089
ENSG00000002587	HS3ST1	heparan sulfate-glucosamine 3-sulfotransferase 1	68	46	1.49071	0.576	0.00842209	0.0459808
ENSG00000145050	MANF	mesencephalic astrocyte derived neurotrophic factor	1104	741	1.48761	0.573	0.00607913	0.0360743
ENSG00000067533	RRP15	ribosomal RNA processing 15 homolog	382	257	1.48761	0.573	0.00416448	0.0272149
ENSG00000134028	ADAMDEC1	ADAM like decysin 1	9746	6550	1.48761	0.573	0.00220763	0.017079
ENSG00000112175	BMP5	bone morphogenetic protein 5	452	304	1.48555	0.571	0.00922747	0.0490149
ENSG00000117114	ADGRL2	adhesion G protein-coupled receptor L2	188	126	1.48555	0.571	0.00606345	0.0360057
ENSG00000135521	LTV1	LTV1 ribosome biogenesis factor	299	201	1.48555	0.571	0.00268309	0.0198034
ENSG00000132423	COQ3	coenzyme Q3, methyltransferase	384	259	1.48555	0.571	0.00132242	0.0114807
ENSG00000157214	STEAP2	STEAP2 metalloreductase	998	672	1.48555	0.571	0.000513538	0.0054519
ENSG00000011295	TTC19	tetratricopeptide repeat domain 19	1901	1279	1.48555	0.571	7.05e-05	0.0010663
ENSG00000044574	HSPA5	heat shock protein family A (Hsp70) member 5	12488	8418	1.48349	0.569	0.00849166	0.0462081
ENSG00000181061	HIGD1A	HIG1 hypoxia inducible domain family member 1A	6828	4603	1.48349	0.569	0.000631211	0.00646982
ENSG00000104131	EIF3J	eukaryotic translation initiation factor 3 subunit J	1583	1067	1.48349	0.569	0.000170106	0.0022086
ENSG00000086848	ALG9	ALG9, alpha-1,2-mannosyltransferase	129	87	1.48144	0.567	0.00641873	0.0375164
ENSG00000180228	PRKRA	protein activator of interferon induced protein kinase EIF2AK2	517	349	1.48144	0.567	0.00108567	0.00988889
ENSG00000003436	TFPI	tissue factor pathway inhibitor	248	168	1.48144	0.567	0.00107755	0.00984886
ENSG00000135045	C9orf40	chromosome 9 open reading frame 40	378	256	1.47939	0.565	0.00630751	0.0370771
ENSG00000107371	EXOSC3	exosome component 3	209	141	1.47939	0.565	0.0005241	0.00553675
ENSG00000145730	PAM	peptidylglycine alpha-amidating monooxygenase	1018	688	1.47939	0.565	5.67e-05	0.000899474
ENSG00000106105	GARS	glycyl-tRNA synthetase	1343	909	1.47734	0.563	0.00791499	0.0439817
ENSG00000184500	PROS1	protein S (alpha)	566	383	1.47734	0.563	0.00262406	0.0194975
ENSG00000136522	MRPL47	mitochondrial ribosomal protein L47	990	669	1.47734	0.563	0.00104793	0.00964891
ENSG00000172086	KRCC1	lysine rich coiled-coil 1	2149	1456	1.47529	0.561	0.000974562	0.00917148
ENSG00000136936	XPA	XPA, DNA damage recognition and repair factor	221	149	1.47325	0.559	0.00126274	0.0110615
ENSG00000115484	CCT4	chaperonin containing TCP1 subunit 4	2182	1481	1.47325	0.559	0.000567655	0.005912
ENSG00000171970	ZNF57	zinc finger protein 57	401	272	1.47019	0.556	0.00723887	0.0412074
ENSG00000121542	SEC22A	SEC22 homolog A, vesicle trafficking protein	218	147	1.47019	0.556	0.00283307	0.0206381
ENSG00000184831	APOO	apolipoprotein O	301	204	1.47019	0.556	0.00063577	0.0065051
ENSG00000153823	PID1	phosphotyrosine interaction domain containing 1	827	563	1.47019	0.556	8.24e-05	0.00122483
ENSG00000184719	RNLS	renalase, FAD dependent amine oxidase	164	112	1.46815	0.554	0.00708164	0.0405235
ENSG00000196591	HDAC2	histone deacetylase 2	1825	1242	1.46815	0.554	0.000235619	0.00288919
ENSG00000166503	HDGFL3	HDGF like 3	154	105	1.46612	0.552	0.00335414	0.0233627
ENSG00000163938	GNL3	G protein nucleolar 3	1324	903	1.46612	0.552	0.00154871	0.0130184
ENSG00000004864	SLC25A13	solute carrier family 25 member 13	908	620	1.46612	0.552	0.001197	0.010625
ENSG00000125247	TMTC4	transmembrane and tetratricopeptide repeat containing 4	368	250	1.46612	0.552	0.000884281	0.0084957
ENSG00000134146	DPH6	diphthamine biosynthesis 6	139	94	1.46409	0.55	0.00262084	0.0194819
ENSG00000206560	ANKRD28	ankyrin repeat domain 28	1134	774	1.46409	0.55	0.0002443	0.00297726
ENSG00000164933	SLC25A32	solute carrier family 25 member 32	340	232	1.46409	0.55	0.000173608	0.00224573
ENSG00000134308	YWHAQ	tyrosine 3-monooxygenase/tryptophan 5-monooxygenase activation protein theta	4671	3189	1.46409	0.55	2.77e-05	0.000504849
ENSG00000057657	PRDM1	PR/SET domain 1	528	361	1.46206	0.548	0.00854256	0.046421
ENSG00000064199	SPA17	sperm autoantigenic protein 17	320	220	1.46206	0.548	0.00765119	0.0428427
ENSG00000139116	KIF21A	kinesin family member 21A	982	671	1.46206	0.548	0.00658603	0.0382592
ENSG00000120694	HSPH1	heat shock protein family H (Hsp110) member 1	1699	1163	1.46206	0.548	0.00524078	0.0323281
ENSG00000111371	SLC38A1	solute carrier family 38 member 1	6331	4331	1.46206	0.548	0.00359942	0.0244814
ENSG00000128654	MTX2	metaxin 2	816	557	1.46206	0.548	0.000983489	0.00921579
ENSG00000115540	MOB4	MOB family member 4, phocein	648	442	1.46206	0.548	0.000101666	0.00145751
ENSG00000055044	NOP58	NOP58 ribonucleoprotein	949	648	1.46206	0.548	9.17e-05	0.00133592
ENSG00000204271	SPIN3	spindlin family member 3	224	153	1.46003	0.546	0.00710824	0.0406358
ENSG00000004779	NDUFAB1	NADH:ubiquinone oxidoreductase subunit AB1	990	677	1.46003	0.546	0.00493484	0.0309219
ENSG00000137944	KYAT3	kynurenine aminotransferase 3	622	426	1.46003	0.546	0.00214575	0.0166811
ENSG00000164815	ORC5	origin recognition complex subunit 5	344	236	1.46003	0.546	0.00152323	0.0128661
ENSG00000197170	PSMD12	proteasome 26S subunit, non-ATPase 12	1556	1065	1.46003	0.546	5.7e-05	0.000901623
ENSG00000090376	IRAK3	interleukin 1 receptor associated kinase 3	167	114	1.45801	0.544	0.00367823	0.0248861
ENSG00000118600	TMEM5	transmembrane protein 5	257	176	1.45801	0.544	0.0029482	0.0212377
ENSG00000227036	LINC00511	long intergenic non-protein coding RNA 511	589	403	1.45801	0.544	0.00215939	0.0167797
ENSG00000184384	MAML2	mastermind like transcriptional coactivator 2	560	384	1.45801	0.544	0.00162711	0.013546
ENSG00000072133	RPS6KA6	ribosomal protein S6 kinase A6	530	363	1.45801	0.544	0.0013142	0.011415
ENSG00000213341	CHUK	conserved helix-loop-helix ubiquitous kinase	789	542	1.45599	0.542	0.00933338	0.0494124
ENSG00000103121	CMC2	C-X9-C motif containing 2	359	246	1.45599	0.542	0.00178818	0.0145215
ENSG00000083750	RRAGB	Ras related GTP binding B	128	88	1.45599	0.542	0.00169361	0.013932
ENSG00000109819	PPARGC1A	PPARG coactivator 1 alpha	1096	753	1.45599	0.542	0.00147783	0.012531
ENSG00000127328	RAB3IP	RAB3A interacting protein	798	549	1.45397	0.54	0.000385791	0.00432185
ENSG00000168385	37500	septin 2	7619	5243	1.45397	0.54	1.54e-05	0.000311363
ENSG00000064726	BTBD1	BTB domain containing 1	1844	1268	1.45397	0.54	6.21e-06	0.000147787
ENSG00000151131	C12orf45	chromosome 12 open reading frame 45	415	285	1.45095	0.537	2.97e-05	0.000529464
ENSG00000172661	WASHC2C	WASH complex subunit 2C	1466	1013	1.44894	0.535	0.00280049	0.0204348
ENSG00000100731	PCNX1	pecanex homolog 1	699	483	1.44894	0.535	0.000978097	0.009195
ENSG00000084733	RAB10	RAB10, member RAS oncogene family	3961	2731	1.44894	0.535	6.14e-05	0.000955092
ENSG00000105810	CDK6	cyclin dependent kinase 6	1097	759	1.44693	0.533	0.00545255	0.033172
ENSG00000123600	METTL8	methyltransferase like 8	398	275	1.44693	0.533	0.00320207	0.0225552
ENSG00000143153	ATP1B1	ATPase Na+/K+ transporting subunit beta 1	17304	11981	1.44493	0.531	0.00244891	0.0184232
ENSG00000163655	GMPS	guanine monophosphate synthase	992	686	1.44493	0.531	0.000566248	0.00590087
ENSG00000118508	RAB32	RAB32, member RAS oncogene family	633	438	1.44293	0.529	0.00856853	0.0465042
ENSG00000075142	SRI	sorcin	16832	11672	1.44293	0.529	0.00725574	0.0412765
ENSG00000156170	NDUFAF6	NADH:ubiquinone oxidoreductase complex assembly factor 6	257	178	1.44293	0.529	0.00180614	0.0146401
ENSG00000091483	FH	fumarate hydratase	2074	1436	1.44293	0.529	0.00151579	0.0128094
ENSG00000128641	MYO1B	myosin IB	2082	1445	1.44093	0.527	0.00831866	0.0456443
ENSG00000112339	HBS1L	HBS1 like translational GTPase	794	551	1.44093	0.527	0.00764716	0.0428339
ENSG00000118985	ELL2	elongation factor for RNA polymerase II 2	630	438	1.44093	0.527	0.00206603	0.0162126
ENSG00000133818	RRAS2	related RAS viral (r-ras) oncogene homolog 2	760	527	1.44093	0.527	1.44e-05	0.000295035
ENSG00000070018	LRP6	LDL receptor related protein 6	1037	721	1.43893	0.525	0.0053461	0.0327474
ENSG00000198729	PPP1R14C	protein phosphatase 1 regulatory inhibitor subunit 14C	778	541	1.43893	0.525	0.000455157	0.00493445
ENSG00000124207	CSE1L	chromosome segregation 1 like	1054	733	1.43694	0.523	0.00819376	0.0451147
ENSG00000119979	FAM45A	family with sequence similarity 45 member A	534	371	1.43694	0.523	0.00596054	0.0355517
ENSG00000183665	TRMT12	tRNA methyltransferase 12 homolog	150	104	1.43694	0.523	0.00483658	0.0304692
ENSG00000178163	ZNF518B	zinc finger protein 518B	304	212	1.43694	0.523	0.00323816	0.0227087
ENSG00000115808	STRN	striatin	1270	883	1.43694	0.523	0.00037128	0.00418072
ENSG00000109270	LAMTOR3	late endosomal/lysosomal adaptor, MAPK and MTOR activator 3	1663	1158	1.43694	0.523	0.000152695	0.00201505
ENSG00000122034	GTF3A	general transcription factor IIIA	892	620	1.43495	0.521	0.00544317	0.033133
ENSG00000138035	PNPT1	polyribonucleotide nucleotidyltransferase 1	629	439	1.43495	0.521	0.0032118	0.0226055
ENSG00000156261	CCT8	chaperonin containing TCP1 subunit 8	2830	1972	1.43495	0.521	0.00317282	0.0223852
ENSG00000116741	RGS2	regulator of G protein signaling 2	454	316	1.43495	0.521	0.0026933	0.0198633
ENSG00000136153	LMO7	LIM domain 7	3377	2355	1.43495	0.521	0.00244727	0.0184188
ENSG00000065613	SLK	STE20 like kinase	2350	1638	1.43495	0.521	0.00212148	0.0165513
ENSG00000197442	MAP3K5	mitogen-activated protein kinase kinase kinase 5	729	508	1.43495	0.521	0.00132412	0.0114897
ENSG00000121879	PIK3CA	phosphatidylinositol-4,5-bisphosphate 3-kinase catalytic subunit alpha	575	401	1.43495	0.521	0.000655052	0.00666449
ENSG00000114030	KPNA1	karyopherin subunit alpha 1	946	659	1.43495	0.521	0.000295349	0.00347343
ENSG00000115159	GPD2	glycerol-3-phosphate dehydrogenase 2	2511	1752	1.43296	0.519	0.000916082	0.00876439
ENSG00000080200	CRYBG3	crystallin beta-gamma domain containing 3	681	475	1.43296	0.519	0.000683552	0.00687448
ENSG00000105821	DNAJC2	DnaJ heat shock protein family (Hsp40) member C2	500	348	1.43296	0.519	0.000313757	0.00365792
ENSG00000182552	RWDD4	RWD domain containing 4	629	438	1.43296	0.519	7.86e-05	0.00117446
ENSG00000065809	FAM107B	family with sequence similarity 107 member B	3014	2107	1.43098	0.517	0.00269376	0.0198633
ENSG00000075420	FNDC3B	fibronectin type III domain containing 3B	1366	955	1.43098	0.517	0.000111543	0.00157712
ENSG00000094841	UPRT	uracil phosphoribosyltransferase homolog	248	174	1.42899	0.515	0.00137355	0.0118305
ENSG00000175582	RAB6A	RAB6A, member RAS oncogene family	3086	2159	1.42899	0.515	3.21e-05	0.000560578
ENSG00000178105	DDX10	DEAD-box helicase 10	335	234	1.42701	0.513	0.00311603	0.0221095
ENSG00000174032	SLC25A30	solute carrier family 25 member 30	415	291	1.42701	0.513	0.00122444	0.0108127
ENSG00000172239	PAIP1	poly(A) binding protein interacting protein 1	1135	796	1.42701	0.513	0.000631838	0.00647246
ENSG00000008394	MGST1	microsomal glutathione S-transferase 1	6294	4417	1.42405	0.51	0.00797243	0.0442587
ENSG00000091409	ITGA6	integrin subunit alpha 6	6681	4687	1.42405	0.51	0.000582947	0.00605683
ENSG00000198315	ZKSCAN8	zinc finger with KRAB and SCAN domains 8	402	282	1.42405	0.51	8.93e-05	0.00130531
ENSG00000197771	MCMBP	minichromosome maintenance complex binding protein	1068	751	1.42208	0.508	0.00633357	0.0371428
ENSG00000117143	UAP1	UDP-N-acetylglucosamine pyrophosphorylase 1	2625	1844	1.42208	0.508	0.00372829	0.0251566
ENSG00000069248	NUP133	nucleoporin 133	724	509	1.42208	0.508	0.00138073	0.0118631
ENSG00000176055	MBLAC2	metallo-beta-lactamase domain containing 2	175	123	1.42011	0.506	0.00492301	0.0308588
ENSG00000175395	ZNF25	zinc finger protein 25	136	96	1.42011	0.506	0.00322345	0.0226328
ENSG00000103342	GSPT1	G1 to S phase transition 1	2849	2005	1.42011	0.506	0.00273331	0.0200451
ENSG00000115827	DCAF17	DDB1 and CUL4 associated factor 17	372	261	1.42011	0.506	0.00254424	0.0190339
ENSG00000153037	SRP19	signal recognition particle 19	268	188	1.42011	0.506	0.00207209	0.0162385
ENSG00000135111	TBX3	T-box 3	360	253	1.42011	0.506	0.00105876	0.00972078
ENSG00000145354	CISD2	CDGSH iron sulfur domain 2	866	610	1.42011	0.506	0.000729492	0.00721892
ENSG00000102595	UGGT2	UDP-glucose glycoprotein glucosyltransferase 2	260	183	1.42011	0.506	0.000680712	0.00685479
ENSG00000187522	HSPA14	heat shock protein family A (Hsp70) member 14	391	275	1.42011	0.506	0.000528691	0.00557262
ENSG00000188785	ZNF548	zinc finger protein 548	182	129	1.41814	0.504	0.00539066	0.0328592
ENSG00000124571	XPO5	exportin 5	468	330	1.41814	0.504	0.0039568	0.0262258
ENSG00000255717	SNHG1	small nucleolar RNA host gene 1	1007	709	1.41814	0.504	0.000427517	0.00470188
ENSG00000068878	PSME4	proteasome activator subunit 4	1177	830	1.41814	0.504	0.000322902	0.00373897
ENSG00000120265	PCMT1	protein-L-isoaspartate (D-aspartate) O-methyltransferase	1052	742	1.41814	0.504	3.03e-05	0.000537339
ENSG00000101132	PFDN4	prefoldin subunit 4	433	306	1.41618	0.502	0.00781286	0.0435249
ENSG00000131979	GCH1	GTP cyclohydrolase 1	640	452	1.41618	0.502	0.00488475	0.0306851
ENSG00000132466	ANKRD17	ankyrin repeat domain 17	1862	1315	1.41618	0.502	0.00392414	0.0260754
ENSG00000131174	COX7B	cytochrome c oxidase subunit 7B	6740	4760	1.41618	0.502	0.00254381	0.0190339
ENSG00000174749	C4orf32	chromosome 4 open reading frame 32	290	204	1.41618	0.502	0.00176708	0.0143902
ENSG00000131467	PSME3	proteasome activator subunit 3	1504	1061	1.41618	0.502	0.00158877	0.0132782
ENSG00000138399	FASTKD1	FAST kinase domains 1	1357	958	1.41618	0.502	0.00139418	0.0119493
ENSG00000112701	SENP6	SUMO1/sentrin specific peptidase 6	1687	1191	1.41618	0.502	0.000522396	0.00553085
ENSG00000121390	PSPC1	paraspeckle component 1	718	507	1.41618	0.502	0.000380725	0.00427057
ENSG00000145703	IQGAP2	IQ motif containing GTPase activating protein 2	3407	2408	1.41421	0.5	0.00780399	0.0434893
ENSG00000168958	MFF	mitochondrial fission factor	942	666	1.41421	0.5	0.00238124	0.0180072
ENSG00000126814	TRMT5	tRNA methyltransferase 5	282	199	1.41421	0.5	0.000744561	0.00732655
ENSG00000111832	RWDD1	RWD domain containing 1	835	591	1.4103	0.496	0.00287357	0.0208376
ENSG00000265354	TIMM23	translocase of inner mitochondrial membrane 23	656	465	1.4103	0.496	0.00212939	0.0165982
ENSG00000113643	RARS	arginyl-tRNA synthetase	1480	1049	1.4103	0.496	0.0010781	0.00984886
ENSG00000067248	DHX29	DExH-box helicase 29	652	463	1.40834	0.494	0.00732045	0.0414825
ENSG00000136104	RNASEH2B	ribonuclease H2 subunit B	389	276	1.40834	0.494	0.00407826	0.026814
ENSG00000078668	VDAC3	voltage dependent anion channel 3	3182	2258	1.40834	0.494	0.000358211	0.00406236
ENSG00000146729	NIPSNAP2	nipsnap homolog 2	1473	1047	1.40639	0.492	0.0022205	0.0171402
ENSG00000196470	SIAH1	siah E3 ubiquitin protein ligase 1	531	377	1.40639	0.492	0.00186967	0.0150642
ENSG00000176853	FAM91A1	family with sequence similarity 91 member A1	1278	910	1.40444	0.49	0.00354975	0.024251
ENSG00000047188	YTHDC2	YTH domain containing 2	892	636	1.40444	0.49	0.00339112	0.0235172
ENSG00000164056	SPRY1	sprouty RTK signaling antagonist 1	279	198	1.40444	0.49	0.00302019	0.0216226
ENSG00000107672	NSMCE4A	NSE4 homolog A, SMC5-SMC6 complex component	800	569	1.40444	0.49	0.00169135	0.0139228
ENSG00000089818	NECAP1	NECAP endocytosis associated 1	824	586	1.40444	0.49	0.000129984	0.00177094
ENSG00000132432	SEC61G	Sec61 translocon gamma subunit	4264	3039	1.4025	0.488	0.00878884	0.0472887
ENSG00000156253	RWDD2B	RWD domain containing 2B	262	187	1.4025	0.488	0.00439708	0.0282257
ENSG00000100519	PSMC6	proteasome 26S subunit, ATPase 6	2050	1462	1.4025	0.488	0.00105919	0.00972078
ENSG00000023041	ZDHHC6	zinc finger DHHC-type containing 6	979	697	1.4025	0.488	7.92e-05	0.00118179
ENSG00000136052	SLC41A2	solute carrier family 41 member 2	1512	1078	1.40056	0.486	0.00182025	0.0147409
ENSG00000112996	MRPS30	mitochondrial ribosomal protein S30	886	632	1.40056	0.486	0.000663515	0.00673379
ENSG00000139323	POC1B	POC1 centriolar protein B	686	489	1.40056	0.486	0.000403728	0.00447688
ENSG00000169139	UBE2V2	ubiquitin conjugating enzyme E2 V2	1151	821	1.40056	0.486	0.000278266	0.00330141
ENSG00000019995	ZRANB1	zinc finger RANBP2-type containing 1	442	317	1.40056	0.486	9.41e-05	0.00136519
ENSG00000102409	BEX4	brain expressed X-linked 4	306	218	1.39862	0.484	0.00847766	0.0461593
ENSG00000099725	PRKY	protein kinase, Y-linked, pseudogene	368	263	1.39862	0.484	0.00802879	0.0445008
ENSG00000170647	TMEM133	transmembrane protein 133	198	141	1.39862	0.484	0.00750185	0.0422774
ENSG00000083937	CHMP2B	charged multivesicular body protein 2B	2740	1959	1.39862	0.484	0.00496856	0.0310775
ENSG00000170270	GON7	GON7, KEOPS complex subunit homolog	462	330	1.39862	0.484	0.00391626	0.0260428
ENSG00000095794	CREM	cAMP responsive element modulator	182	130	1.39862	0.484	0.00345125	0.0237925
ENSG00000164073	MFSD8	major facilitator superfamily domain containing 8	533	381	1.39862	0.484	0.00196262	0.0156117
ENSG00000113575	PPP2CA	protein phosphatase 2 catalytic subunit alpha	2100	1500	1.39862	0.484	0.000399252	0.00443851
ENSG00000213047	DENND1B	DENN domain containing 1B	1046	749	1.39668	0.482	0.00389412	0.0259821
ENSG00000151247	EIF4E	eukaryotic translation initiation factor 4E	2612	1869	1.39668	0.482	0.00292574	0.0211195
ENSG00000138660	AP1AR	adaptor related protein complex 1 associated regulatory protein	1004	719	1.39668	0.482	0.00287721	0.0208553
ENSG00000061794	MRPS35	mitochondrial ribosomal protein S35	2266	1622	1.39668	0.482	0.00284603	0.020698
ENSG00000136160	EDNRB	endothelin receptor type B	507	364	1.39474	0.48	0.00911387	0.0486132
ENSG00000092108	SCFD1	sec1 family domain containing 1	1277	915	1.39474	0.48	0.00268325	0.0198034
ENSG00000115233	PSMD14	proteasome 26S subunit, non-ATPase 14	948	679	1.39474	0.48	0.00257843	0.0192238
ENSG00000107372	ZFAND5	zinc finger AN1-type containing 5	2329	1669	1.39474	0.48	0.00185781	0.0149756
ENSG00000135317	SNX14	sorting nexin 14	1439	1032	1.39474	0.48	0.00155881	0.0130845
ENSG00000049860	HEXB	hexosaminidase subunit beta	2799	2007	1.39474	0.48	0.0010228	0.00948752
ENSG00000119326	CTNNAL1	catenin alpha like 1	262	187	1.39281	0.478	0.00755281	0.042441
ENSG00000185088	RPS27L	ribosomal protein S27 like	3191	2291	1.39281	0.478	0.00632793	0.0371348
ENSG00000116044	NFE2L2	nuclear factor, erythroid 2 like 2	2814	2019	1.39281	0.478	0.0026382	0.0195722
ENSG00000225470	JPX	JPX transcript, XIST activator (non-protein coding)	482	347	1.39281	0.478	0.0022296	0.0171877
ENSG00000147669	POLR2K	RNA polymerase II subunit K	1236	888	1.39281	0.478	0.000206805	0.00258336
ENSG00000166889	PATL1	PAT1 homolog 1, processing body mRNA decay factor	1120	804	1.39281	0.478	0.000120306	0.00166995
ENSG00000130826	DKC1	dyskerin pseudouridine synthase 1	1153	828	1.39088	0.476	0.00949043	0.0499412
ENSG00000154447	SH3RF1	SH3 domain containing ring finger 1	1331	957	1.39088	0.476	0.00637725	0.0373113
ENSG00000076043	REXO2	RNA exonuclease 2	348	250	1.39088	0.476	0.00611658	0.0362228
ENSG00000198707	CEP290	centrosomal protein 290	344	246	1.39088	0.476	0.00323966	0.0227101
ENSG00000137124	ALDH1B1	aldehyde dehydrogenase 1 family member B1	1076	774	1.39088	0.476	0.00194553	0.0155222
ENSG00000091164	TXNL1	thioredoxin like 1	1270	913	1.39088	0.476	0.00102953	0.00952466
ENSG00000188725	SMIM15	small integral membrane protein 15	2202	1583	1.39088	0.476	0.000453189	0.00491616
ENSG00000035141	FAM136A	family with sequence similarity 136 member A	1030	739	1.39088	0.476	0.00016437	0.00214689
ENSG00000143643	TTC13	tetratricopeptide repeat domain 13	652	469	1.38896	0.474	0.00727946	0.0413441
ENSG00000128050	PAICS	phosphoribosylaminoimidazole carboxylase and phosphoribosylaminoimidazolesuccinocarboxamide synthase	2628	1893	1.38896	0.474	0.00587387	0.0351909
ENSG00000138802	SEC24B	SEC24 homolog B, COPII coat complex component	933	672	1.38896	0.474	0.00453687	0.0289602
ENSG00000084073	ZMPSTE24	zinc metallopeptidase STE24	2127	1531	1.38896	0.474	0.00443348	0.028412
ENSG00000153207	AHCTF1	AT-hook containing transcription factor 1	758	546	1.38703	0.472	0.00788031	0.0438587
ENSG00000144909	OSBPL11	oxysterol binding protein like 11	676	487	1.38703	0.472	0.00644447	0.0376415
ENSG00000198121	LPAR1	lysophosphatidic acid receptor 1	549	397	1.38703	0.472	0.00159533	0.0133142
ENSG00000148634	HERC4	HECT and RLD domain containing E3 ubiquitin protein ligase 4	1435	1035	1.38703	0.472	0.00137832	0.0118483
ENSG00000172939	OXSR1	oxidative stress responsive 1	1511	1089	1.38703	0.472	0.00110863	0.0100333
ENSG00000126524	SBDS	SBDS, ribosome maturation factor	2520	1817	1.38703	0.472	0.000667878	0.00676629
ENSG00000093000	NUP50	nucleoporin 50	1561	1126	1.38511	0.47	0.00406743	0.0267529
ENSG00000005700	IBTK	inhibitor of Bruton tyrosine kinase	2004	1446	1.38511	0.47	0.00305171	0.0217948
ENSG00000086061	DNAJA1	DnaJ heat shock protein family (Hsp40) member A1	3012	2175	1.38511	0.47	0.00273047	0.0200442
ENSG00000135945	REV1	REV1, DNA directed polymerase	672	484	1.38511	0.47	0.0010895	0.00990639
ENSG00000126777	KTN1	kinectin 1	9892	7153	1.38319	0.468	0.005292	0.032553
ENSG00000115594	IL1R1	interleukin 1 receptor type 1	875	632	1.38319	0.468	0.00307848	0.0219142
ENSG00000122958	VPS26A	VPS26, retromer complex component A	2487	1798	1.38319	0.468	0.00286122	0.0207739
ENSG00000023734	STRAP	serine/threonine kinase receptor associated protein	1766	1276	1.38319	0.468	0.00206693	0.0162126
ENSG00000125977	EIF2S2	eukaryotic translation initiation factor 2 subunit beta	1642	1187	1.38319	0.468	0.00128046	0.0111775
ENSG00000120699	EXOSC8	exosome component 8	618	446	1.38319	0.468	0.000511883	0.0054381
ENSG00000131508	UBE2D2	ubiquitin conjugating enzyme E2 D2	2969	2148	1.38319	0.468	0.000216653	0.00269291
ENSG00000182952	HMGN4	high mobility group nucleosomal binding domain 4	983	711	1.38319	0.468	7.7e-05	0.00115237
ENSG00000082212	ME2	malic enzyme 2	2608	1887	1.38127	0.466	0.00170252	0.0139818
ENSG00000120798	NR2C1	nuclear receptor subfamily 2 group C member 1	428	309	1.38127	0.466	0.00122631	0.0108183
ENSG00000152601	MBNL1	muscleblind like splicing regulator 1	4686	3391	1.38127	0.466	3.13e-05	0.000549913
ENSG00000135862	LAMC1	laminin subunit gamma 1	869	630	1.37936	0.464	0.00823546	0.0452978
ENSG00000135776	ABCB10	ATP binding cassette subfamily B member 10	685	497	1.37936	0.464	0.00466606	0.0296201
ENSG00000186104	CYP2R1	cytochrome P450 family 2 subfamily R member 1	366	265	1.37936	0.464	0.00435844	0.0280133
ENSG00000145293	ENOPH1	enolase-phosphatase 1	549	398	1.37936	0.464	0.00396178	0.0262258
ENSG00000138777	PPA2	pyrophosphatase (inorganic) 2	1704	1235	1.37936	0.464	0.00327802	0.0228964
ENSG00000166164	BRD7	bromodomain containing 7	1171	849	1.37936	0.464	0.00231362	0.0176486
ENSG00000146963	LUC7L2	LUC7 like 2, pre-mRNA splicing factor	819	594	1.37936	0.464	0.00153182	0.0129261
ENSG00000188529	SRSF10	serine and arginine rich splicing factor 10	2262	1640	1.37936	0.464	0.00121891	0.0107748
ENSG00000114686	MRPL3	mitochondrial ribosomal protein L3	1253	910	1.37745	0.462	0.00844581	0.0460815
ENSG00000164172	MOCS2	molybdenum cofactor synthesis 2	579	420	1.37745	0.462	0.00809407	0.0447754
ENSG00000055147	FAM114A2	family with sequence similarity 114 member A2	343	249	1.37745	0.462	0.0076339	0.042787
ENSG00000170515	PA2G4	proliferation-associated 2G4	1636	1187	1.37745	0.462	0.0071782	0.0409687
ENSG00000166326	TRIM44	tripartite motif containing 44	1620	1177	1.37745	0.462	0.00440877	0.0282848
ENSG00000089335	ZNF302	zinc finger protein 302	529	384	1.37745	0.462	0.00262019	0.0194819
ENSG00000102786	INTS6	integrator complex subunit 6	826	599	1.37745	0.462	0.00119404	0.0106193
ENSG00000130699	TAF4	TATA-box binding protein associated factor 4	298	216	1.37745	0.462	0.00109907	0.00997269
ENSG00000113569	NUP155	nucleoporin 155	783	568	1.37745	0.462	0.00059766	0.00618763
ENSG00000100612	DHRS7	dehydrogenase/reductase 7	1346	979	1.37554	0.46	0.00834874	0.0457662
ENSG00000047365	ARAP2	ArfGAP with RhoGAP domain, ankyrin repeat and PH domain 2	506	368	1.37554	0.46	0.00397719	0.0263079
ENSG00000010270	STARD3NL	STARD3 N-terminal like	496	360	1.37554	0.46	0.00264465	0.0195873
ENSG00000047621	C12orf4	chromosome 12 open reading frame 4	372	270	1.37554	0.46	0.00232759	0.0177242
ENSG00000173692	PSMD1	proteasome 26S subunit, non-ATPase 1	2524	1837	1.37364	0.458	0.00593516	0.0354173
ENSG00000138668	HNRNPD	heterogeneous nuclear ribonucleoprotein D	4505	3278	1.37364	0.458	0.00220768	0.017079
ENSG00000057663	ATG5	autophagy related 5	1249	909	1.37364	0.458	0.00177486	0.0144334
ENSG00000134108	ARL8B	ADP ribosylation factor like GTPase 8B	1432	1043	1.37364	0.458	0.00143595	0.0122354
ENSG00000180370	PAK2	p21 (RAC1) activated kinase 2	2196	1597	1.37364	0.458	0.000229981	0.0028327
ENSG00000108559	NUP88	nucleoporin 88	726	529	1.37173	0.456	0.00692514	0.0398235
ENSG00000116815	CD58	CD58 molecule	428	312	1.37173	0.456	0.00631136	0.0370872
ENSG00000131263	RLIM	ring finger protein, LIM domain interacting	854	622	1.37173	0.456	0.00513055	0.0318174
ENSG00000185947	ZNF267	zinc finger protein 267	289	211	1.37173	0.456	0.00392322	0.0260754
ENSG00000198833	UBE2J1	ubiquitin conjugating enzyme E2 J1	3065	2236	1.37173	0.456	0.00252721	0.0189227
ENSG00000005801	ZNF195	zinc finger protein 195	528	384	1.37173	0.456	0.00178078	0.0144739
ENSG00000147050	KDM6A	lysine demethylase 6A	660	481	1.37173	0.456	0.00170663	0.0139958
ENSG00000119335	SET	SET nuclear proto-oncogene	8126	5926	1.37173	0.456	0.00153598	0.0129438
ENSG00000015153	YAF2	YY1 associated factor 2	225	164	1.37173	0.456	0.00126863	0.0110925
ENSG00000065135	GNAI3	G protein subunit alpha i3	2064	1504	1.37173	0.456	0.000871933	0.00839554
ENSG00000164823	OSGIN2	oxidative stress induced growth inhibitor family member 2	388	283	1.36983	0.454	0.00930933	0.0493448
ENSG00000110422	HIPK3	homeodomain interacting protein kinase 3	1787	1304	1.36983	0.454	0.00871223	0.0470068
ENSG00000196510	ANAPC7	anaphase promoting complex subunit 7	640	466	1.36983	0.454	0.00850677	0.0462678
ENSG00000086827	ZW10	zw10 kinetochore protein	442	323	1.36983	0.454	0.00726078	0.0412917
ENSG00000107669	ATE1	arginyltransferase 1	1170	853	1.36983	0.454	0.00685557	0.0395275
ENSG00000104331	IMPAD1	inositol monophosphatase domain containing 1	1938	1417	1.36794	0.452	0.00773539	0.0432173
ENSG00000173349	SFT2D3	SFT2 domain containing 3	280	204	1.36794	0.452	0.00740893	0.0418618
ENSG00000197111	PCBP2	poly(rC) binding protein 2	4445	3251	1.36794	0.452	0.00435657	0.0280125
ENSG00000138326	RPS24	ribosomal protein S24	29597	21638	1.36794	0.452	0.00394929	0.0262027
ENSG00000114062	UBE3A	ubiquitin protein ligase E3A	1562	1141	1.36794	0.452	0.00180327	0.0146236
ENSG00000136450	SRSF1	serine and arginine rich splicing factor 1	4347	3176	1.36794	0.452	0.00126345	0.0110621
ENSG00000158987	RAPGEF6	Rap guanine nucleotide exchange factor 6	314	229	1.36794	0.452	0.000990313	0.00926059
ENSG00000198060	38412	membrane associated ring-CH-type finger 5	752	549	1.36794	0.452	0.000789705	0.0077239
ENSG00000074603	DPP8	dipeptidyl peptidase 8	1288	943	1.36604	0.45	0.00926753	0.0491678
ENSG00000006451	RALA	RAS like proto-oncogene A	2463	1802	1.36604	0.45	0.0059957	0.0356883
ENSG00000144747	TMF1	TATA element modulatory factor 1	1735	1271	1.36604	0.45	0.00229733	0.0175626
ENSG00000155636	RBM45	RNA binding motif protein 45	266	194	1.36604	0.45	0.00195181	0.0155419
ENSG00000124406	ATP8A1	ATPase phospholipid transporting 8A1	2536	1860	1.36415	0.448	0.00840964	0.0459415
ENSG00000151093	OXSM	3-oxoacyl-ACP synthase, mitochondrial	353	258	1.36415	0.448	0.00442132	0.0283445
ENSG00000198522	GPN1	GPN-loop GTPase 1	567	415	1.36415	0.448	0.00287337	0.0208376
ENSG00000163605	PPP4R2	protein phosphatase 4 regulatory subunit 2	1692	1240	1.36415	0.448	0.00272838	0.0200425
ENSG00000118454	ANKRD13C	ankyrin repeat domain 13C	605	443	1.36226	0.446	0.00255578	0.0190957
ENSG00000135018	UBQLN1	ubiquilin 1	3034	2227	1.36226	0.446	0.000351725	0.00400962
ENSG00000163378	EOGT	EGF domain specific O-linked N-acetylglucosamine transferase	267	196	1.36037	0.444	0.0074467	0.042048
ENSG00000140598	EFL1	elongation factor like GTPase 1	1026	755	1.36037	0.444	0.0071982	0.0410561
ENSG00000120742	SERP1	stress associated endoplasmic reticulum protein 1	3565	2619	1.36037	0.444	0.00389736	0.0259863
ENSG00000137960	GIPC2	GIPC PDZ domain containing family member 2	1422	1045	1.36037	0.444	0.00341464	0.0236442
ENSG00000143158	MPC2	mitochondrial pyruvate carrier 2	1607	1180	1.36037	0.444	0.00209603	0.0163894
ENSG00000131002	TXLNGY	taxilin gamma pseudogene, Y-linked	1154	848	1.36037	0.444	0.00163806	0.0135929
ENSG00000136159	NUDT15	nudix hydrolase 15	948	696	1.36037	0.444	0.00118618	0.0105602
ENSG00000115091	ACTR3	ARP3 actin related protein 3 homolog	6993	5139	1.36037	0.444	0.000647872	0.00660188
ENSG00000276234	TADA2A	transcriptional adaptor 2A	472	348	1.35849	0.442	0.00706864	0.0404623
ENSG00000122435	TRMT13	tRNA methyltransferase 13 homolog	385	283	1.35849	0.442	0.00347882	0.023907
ENSG00000164209	SLC25A46	solute carrier family 25 member 46	1636	1204	1.35849	0.442	0.000969287	0.00913794
ENSG00000068305	MEF2A	myocyte enhancer factor 2A	813	598	1.35849	0.442	0.000258853	0.00311551
ENSG00000187189	TSPYL4	TSPY like 4	340	251	1.35849	0.442	0.000215955	0.00268805
ENSG00000180957	PITPNB	phosphatidylinositol transfer protein beta	1139	840	1.3566	0.44	0.00864498	0.0467305
ENSG00000130935	NOL11	nucleolar protein 11	906	668	1.3566	0.44	0.00752758	0.0423815
ENSG00000137055	PLAA	phospholipase A2 activating protein	663	488	1.3566	0.44	0.0053048	0.032591
ENSG00000085415	SEH1L	SEH1 like nucleoporin	797	586	1.3566	0.44	0.0043038	0.0277744
ENSG00000115866	DARS	aspartyl-tRNA synthetase	895	660	1.3566	0.44	0.00214051	0.0166552
ENSG00000173674	EIF1AX	eukaryotic translation initiation factor 1A, X-linked	1948	1436	1.3566	0.44	0.00208815	0.0163423
ENSG00000101856	PGRMC1	progesterone receptor membrane component 1	2788	2054	1.3566	0.44	0.000552013	0.00577663
ENSG00000108010	GLRX3	glutaredoxin 3	757	559	1.35472	0.438	0.00585683	0.0351224
ENSG00000165502	RPL36AL	ribosomal protein L36a like	5208	3843	1.35472	0.438	0.00314446	0.022257
ENSG00000112305	SMAP1	small ArfGAP 1	1315	970	1.35472	0.438	0.00293632	0.0211784
ENSG00000143889	HNRNPLL	heterogeneous nuclear ribonucleoprotein L like	690	509	1.35472	0.438	0.00115293	0.0103538
ENSG00000164924	YWHAZ	tyrosine 3-monooxygenase/tryptophan 5-monooxygenase activation protein zeta	26014	19187	1.35472	0.438	0.000960212	0.00907063
ENSG00000109133	TMEM33	transmembrane protein 33	2434	1795	1.35472	0.438	0.000815876	0.00794774
ENSG00000101558	VAPA	VAMP associated protein A	3472	2562	1.35472	0.438	0.000361799	0.00410039
ENSG00000153989	NUS1	NUS1 dehydrodolichyl diphosphate synthase subunit	1578	1166	1.35285	0.436	0.00887347	0.0476854
ENSG00000145715	RASA1	RAS p21 protein activator 1	822	608	1.35285	0.436	0.00847636	0.0461593
ENSG00000059769	DNAJC25	DnaJ heat shock protein family (Hsp40) member C25	341	251	1.35285	0.436	0.00835857	0.045777
ENSG00000143207	RFWD2	ring finger and WD repeat domain 2	1236	912	1.35285	0.436	0.00731611	0.0414774
ENSG00000160124	CCDC58	coiled-coil domain containing 58	615	454	1.35285	0.436	0.00457354	0.0291599
ENSG00000197798	FAM118B	family with sequence similarity 118 member B	1156	854	1.35285	0.436	0.00229148	0.0175333
ENSG00000137955	RABGGTB	Rab geranylgeranyltransferase beta subunit	1227	905	1.35285	0.436	0.00175912	0.0143522
ENSG00000078140	UBE2K	ubiquitin conjugating enzyme E2 K	3382	2499	1.35285	0.436	0.00172416	0.0141131
ENSG00000081870	HSPB11	heat shock protein family B (small) member 11	383	284	1.35285	0.436	0.00152575	0.0128811
ENSG00000198648	STK39	serine/threonine kinase 39	1784	1319	1.35285	0.436	0.00111865	0.0101136
ENSG00000173848	NET1	neuroepithelial cell transforming 1	6177	4570	1.35097	0.434	0.00778115	0.0433897
ENSG00000161547	SRSF2	serine and arginine rich splicing factor 2	2592	1918	1.35097	0.434	0.00680141	0.0392901
ENSG00000171806	METTL18	methyltransferase like 18	187	138	1.35097	0.434	0.00504359	0.0314792
ENSG00000137504	CREBZF	CREB/ATF bZIP transcription factor	1190	880	1.35097	0.434	0.00447729	0.0286402
ENSG00000257267	ZNF271P	zinc finger protein 271, pseudogene	618	458	1.35097	0.434	0.00439795	0.0282257
ENSG00000138698	RAP1GDS1	Rap1 GTPase-GDP dissociation stimulator 1	615	455	1.35097	0.434	0.00065988	0.00670613
ENSG00000170854	RIOX2	ribosomal oxygenase 2	484	358	1.3491	0.432	0.00762238	0.0427499
ENSG00000185246	PRPF39	pre-mRNA processing factor 39	653	483	1.3491	0.432	0.00741828	0.041901
ENSG00000116560	SFPQ	splicing factor proline and glutamine rich	6249	4627	1.3491	0.432	0.00010625	0.00151578
ENSG00000198791	CNOT7	CCR4-NOT transcription complex subunit 7	1433	1063	1.34817	0.431	0.00840275	0.0459182
ENSG00000139624	CERS5	ceramide synthase 5	295	218	1.34817	0.431	0.00838136	0.0458581
ENSG00000083642	PDS5B	PDS5 cohesin associated factor B	637	472	1.34817	0.431	0.00145007	0.0123376
ENSG00000187866	FAM122A	family with sequence similarity 122A	323	240	1.3463	0.429	0.00156038	0.0130876
ENSG00000140006	WDR89	WD repeat domain 89	361	267	1.3463	0.429	0.00139826	0.0119726
ENSG00000104450	SPAG1	sperm associated antigen 1	879	654	1.34443	0.427	0.00863466	0.0467036
ENSG00000103037	SETD6	SET domain containing 6	311	231	1.34443	0.427	0.00718464	0.0409921
ENSG00000154174	TOMM70	translocase of outer mitochondrial membrane 70	1749	1301	1.34443	0.427	0.00637532	0.0373113
ENSG00000102054	RBBP7	RB binding protein 7, chromatin remodeling factor	1962	1459	1.34443	0.427	0.000529455	0.00557395
ENSG00000144224	UBXN4	UBX domain protein 4	2967	2211	1.34257	0.425	0.00950598	0.0499628
ENSG00000225921	NOL7	nucleolar protein 7	641	476	1.34257	0.425	0.00913964	0.0486816
ENSG00000135249	RINT1	RAD50 interactor 1	330	246	1.34257	0.425	0.00582214	0.0349647
ENSG00000108424	KPNB1	karyopherin subunit beta 1	4296	3200	1.34257	0.425	0.00405186	0.0266771
ENSG00000272888	LINC01578	long intergenic non-protein coding RNA 1578	978	728	1.34257	0.425	0.00304375	0.0217468
ENSG00000166747	AP1G1	adaptor related protein complex 1 gamma 1 subunit	2569	1912	1.34257	0.425	0.00126235	0.0110615
ENSG00000164031	DNAJB14	DnaJ heat shock protein family (Hsp40) member B14	1329	993	1.34071	0.423	0.00727784	0.0413441
ENSG00000011566	MAP4K3	mitogen-activated protein kinase kinase kinase kinase 3	621	463	1.34071	0.423	0.00610728	0.0361922
ENSG00000127955	GNAI1	G protein subunit alpha i1	605	452	1.34071	0.423	0.005901	0.0353165
ENSG00000136261	BZW2	basic leucine zipper and W2 domains 2	1386	1034	1.34071	0.423	0.00357071	0.0243376
ENSG00000175387	SMAD2	SMAD family member 2	1640	1222	1.34071	0.423	0.00109803	0.00997269
ENSG00000080822	CLDND1	claudin domain containing 1	796	594	1.34071	0.423	0.000998024	0.00930708
ENSG00000176731	C8orf59	chromosome 8 open reading frame 59	1254	936	1.34071	0.423	0.000835254	0.00808245
ENSG00000198843	SELENOT	selenoprotein T	1908	1424	1.34071	0.423	0.000794247	0.00775434
ENSG00000113387	SUB1	SUB1 homolog, transcriptional regulator	3716	2775	1.33886	0.421	0.00546975	0.0332601
ENSG00000134851	TMEM165	transmembrane protein 165	985	736	1.33886	0.421	0.00512193	0.0317978
ENSG00000151923	TIAL1	TIA1 cytotoxic granule associated RNA binding protein like 1	1526	1139	1.33886	0.421	0.00432772	0.0278876
ENSG00000120159	CAAP1	caspase activity and apoptosis inhibitor 1	904	675	1.33886	0.421	0.00358311	0.0244041
ENSG00000213593	TMX2	thioredoxin related transmembrane protein 2	2052	1533	1.33886	0.421	0.00332388	0.0231889
ENSG00000079785	DDX1	DEAD-box helicase 1	2320	1734	1.337	0.419	0.00702186	0.0402869
ENSG00000096717	SIRT1	sirtuin 1	500	374	1.337	0.419	0.00426526	0.0276258
ENSG00000163950	SLBP	stem-loop binding protein	582	435	1.337	0.419	0.00375225	0.0252665
ENSG00000146409	SLC18B1	solute carrier family 18 member B1	393	293	1.337	0.419	0.00240743	0.0181895
ENSG00000119844	AFTPH	aftiphilin	1743	1304	1.337	0.419	0.000898675	0.00861505
ENSG00000173726	TOMM20	translocase of outer mitochondrial membrane 20	4266	3196	1.33515	0.417	0.00855005	0.0464435
ENSG00000213551	DNAJC9	DnaJ heat shock protein family (Hsp40) member C9	578	432	1.33515	0.417	0.00776573	0.0433314
ENSG00000145216	FIP1L1	factor interacting with PAPOLA and CPSF1	444	333	1.33515	0.417	0.00299572	0.0214915
ENSG00000118855	MFSD1	major facilitator superfamily domain containing 1	1643	1230	1.33515	0.417	0.00134392	0.0116269
ENSG00000179833	SERTAD2	SERTA domain containing 2	658	493	1.33515	0.417	0.00132621	0.0114964
ENSG00000149483	TMEM138	transmembrane protein 138	552	414	1.33515	0.417	0.000506566	0.00538992
ENSG00000153827	TRIP12	thyroid hormone receptor interactor 12	3010	2258	1.3333	0.415	0.00566817	0.0341812
ENSG00000105983	LMBR1	limb development membrane protein 1	594	446	1.3333	0.415	0.00426617	0.0276258
ENSG00000187079	TEAD1	TEA domain transcription factor 1	727	546	1.3333	0.415	0.00399066	0.026357
ENSG00000122741	DCAF10	DDB1 and CUL4 associated factor 10	771	578	1.3333	0.415	0.00381825	0.0255858
ENSG00000071994	PDCD2	programmed cell death 2	724	543	1.3333	0.415	0.00335827	0.0233728
ENSG00000197930	ERO1A	endoplasmic reticulum oxidoreductase 1 alpha	2075	1556	1.3333	0.415	0.00315777	0.0223151
ENSG00000081019	RSBN1	round spermatid basic protein 1	983	737	1.3333	0.415	0.00281792	0.0205448
ENSG00000154743	TSEN2	tRNA splicing endonuclease subunit 2	382	286	1.3333	0.415	0.00273204	0.0200442
ENSG00000225484	NUTM2B-AS1	NUTM2B antisense RNA 1	650	488	1.33145	0.413	0.00409148	0.0268545
ENSG00000078618	NRDC	nardilysin convertase	1994	1496	1.33145	0.413	0.00126915	0.0110925
ENSG00000258890	CEP95	centrosomal protein 95	706	530	1.32961	0.411	0.00938449	0.0495928
ENSG00000121481	RNF2	ring finger protein 2	315	237	1.32961	0.411	0.00873152	0.0470673
ENSG00000135913	USP37	ubiquitin specific peptidase 37	313	235	1.32961	0.411	0.00802661	0.0445008
ENSG00000163512	AZI2	5-azacytidine induced 2	699	525	1.32961	0.411	0.0035945	0.0244616
ENSG00000198900	TOP1	topoisomerase (DNA) I	3328	2502	1.32961	0.411	0.00135046	0.0116777
ENSG00000148229	POLE3	DNA polymerase epsilon 3, accessory subunit	860	646	1.32961	0.411	0.000348179	0.00397438
ENSG00000198604	BAZ1A	bromodomain adjacent to zinc finger domain 1A	1114	839	1.32777	0.409	0.00942035	0.0497154
ENSG00000157045	NTAN1	N-terminal asparagine amidase	425	320	1.32777	0.409	0.00893649	0.0478915
ENSG00000166575	TMEM135	transmembrane protein 135	589	443	1.32777	0.409	0.00721195	0.0410997
ENSG00000121892	PDS5A	PDS5 cohesin associated factor A	2104	1583	1.32777	0.409	0.00557339	0.0337286
ENSG00000087470	DNM1L	dynamin 1 like	1267	954	1.32777	0.409	0.00395802	0.0262258
ENSG00000127922	SEM1	SEM1, 26S proteasome complex subunit	3110	2342	1.32777	0.409	0.00348016	0.023907
ENSG00000158435	CNOT11	CCR4-NOT transcription complex subunit 11	1114	839	1.32777	0.409	0.00280825	0.0204828
ENSG00000097033	SH3GLB1	SH3 domain containing GRB2 like, endophilin B1	3149	2372	1.32777	0.409	0.00206433	0.0162126
ENSG00000170632	ARMC10	armadillo repeat containing 10	694	521	1.32777	0.409	0.0012429	0.0109205
ENSG00000217128	FNIP1	folliculin interacting protein 1	611	461	1.32593	0.407	0.00889348	0.0477668
ENSG00000156735	BAG4	BCL2 associated athanogene 4	428	322	1.32593	0.407	0.00685369	0.0395275
ENSG00000051108	HERPUD1	homocysteine inducible ER protein with ubiquitin like domain 1	3079	2322	1.32593	0.407	0.00484902	0.0305264
ENSG00000170606	HSPA4	heat shock protein family A (Hsp70) member 4	2531	1909	1.32593	0.407	0.00432663	0.0278876
ENSG00000146278	PNRC1	proline rich nuclear receptor coactivator 1	910	687	1.32409	0.405	0.00478653	0.0302092
ENSG00000115761	NOL10	nucleolar protein 10	487	367	1.32409	0.405	0.00416726	0.0272149
ENSG00000109919	MTCH2	mitochondrial carrier 2	2850	2150	1.32409	0.405	0.00344542	0.0237711
ENSG00000173812	EIF1	eukaryotic translation initiation factor 1	5486	4144	1.32317	0.404	0.00913078	0.0486624
ENSG00000137492	THAP12	THAP domain containing 12	1146	866	1.32317	0.404	0.00891792	0.0478473
ENSG00000134046	MBD2	methyl-CpG binding domain protein 2	1432	1081	1.32317	0.404	0.00776137	0.0433209
ENSG00000153879	CEBPG	CCAAT/enhancer binding protein gamma	2345	1772	1.32317	0.404	0.00690591	0.0397522
ENSG00000048544	MRPS10	mitochondrial ribosomal protein S10	819	619	1.32317	0.404	0.00642779	0.0375567
ENSG00000135241	PNPLA8	patatin like phospholipase domain containing 8	765	579	1.32317	0.404	0.00275098	0.0201324
ENSG00000126261	UBA2	ubiquitin like modifier activating enzyme 2	1094	827	1.32317	0.404	0.00163122	0.0135619
ENSG00000130349	C6orf203	chromosome 6 open reading frame 203	749	566	1.32134	0.402	0.00924565	0.0490817
ENSG00000050393	MCUR1	mitochondrial calcium uniporter regulator 1	1190	900	1.32134	0.402	0.00816527	0.0450715
ENSG00000129472	RAB2B	RAB2B, member RAS oncogene family	536	407	1.32134	0.402	0.00810435	0.0447776
ENSG00000109670	FBXW7	F-box and WD repeat domain containing 7	475	360	1.32134	0.402	0.00810138	0.0447754
ENSG00000189079	ARID2	AT-rich interaction domain 2	586	443	1.32134	0.402	0.00735779	0.0416401
ENSG00000134444	KIAA1468	KIAA1468	1192	901	1.32134	0.402	0.00575553	0.0346124
ENSG00000118217	ATF6	activating transcription factor 6	1069	811	1.31951	0.4	0.00906563	0.0484202
ENSG00000181472	ZBTB2	zinc finger and BTB domain containing 2	260	197	1.31951	0.4	0.00727366	0.0413441
ENSG00000109184	DCUN1D4	defective in cullin neddylation 1 domain containing 4	713	541	1.31951	0.4	0.00380093	0.0254936
ENSG00000146425	DYNLT1	dynein light chain Tctex-type 1	2542	1926	1.31951	0.4	0.00107868	0.00984899
ENSG00000164332	UBLCP1	ubiquitin like domain containing CTD phosphatase 1	467	355	1.31768	0.398	0.00804488	0.0445476
ENSG00000183765	CHEK2	checkpoint kinase 2	314	238	1.31768	0.398	0.00745713	0.0420933
ENSG00000119537	KDSR	3-ketodihydrosphingosine reductase	632	480	1.31768	0.398	0.007173	0.0409524
ENSG00000163412	EIF4E3	eukaryotic translation initiation factor 4E family member 3	1609	1222	1.31768	0.398	0.0041702	0.0272239
ENSG00000134697	GNL2	G protein nucleolar 2	700	530	1.31768	0.398	0.00258515	0.0192575
ENSG00000090263	MRPS33	mitochondrial ribosomal protein S33	1618	1227	1.31768	0.398	0.00190183	0.0152671
ENSG00000106546	AHR	aryl hydrocarbon receptor	1085	823	1.31768	0.398	0.0009854	0.00922875
ENSG00000137074	APTX	aprataxin	561	425	1.31768	0.398	0.00052267	0.00553085
ENSG00000159216	RUNX1	runt related transcription factor 1	599	454	1.31585	0.396	0.00601589	0.035772
ENSG00000090060	PAPOLA	poly(A) polymerase alpha	3768	2864	1.31585	0.396	0.0042303	0.027493
ENSG00000150787	PTS	6-pyruvoyltetrahydropterin synthase	306	233	1.31585	0.396	0.0030732	0.0218856
ENSG00000129128	SPCS3	signal peptidase complex subunit 3	3540	2692	1.31585	0.396	0.00306254	0.0218363
ENSG00000176623	RMDN1	regulator of microtubule dynamics 1	928	705	1.31585	0.396	0.000394017	0.00439709
ENSG00000120992	LYPLA1	lysophospholipase I	1882	1432	1.31403	0.394	0.00890421	0.0477921
ENSG00000104047	DTWD1	DTW domain containing 1	348	265	1.31403	0.394	0.00850909	0.0462678
ENSG00000136045	PWP1	PWP1 homolog, endonuclein	566	431	1.31403	0.394	0.00838665	0.0458589
ENSG00000142864	SERBP1	SERPINE1 mRNA binding protein 1	5311	4039	1.31403	0.394	0.00485768	0.0305557
ENSG00000164219	PGGT1B	protein geranylgeranyltransferase type I subunit beta	1510	1149	1.31403	0.394	0.00259886	0.0193431
ENSG00000132463	GRSF1	G-rich RNA sequence binding factor 1	2840	2159	1.31403	0.394	0.000990389	0.00926059
ENSG00000168564	CDKN2AIP	CDKN2A interacting protein	494	376	1.31221	0.392	0.00859841	0.0465652
ENSG00000151092	NGLY1	N-glycanase 1	834	635	1.31221	0.392	0.00786093	0.0437648
ENSG00000138385	SSB	Sjogren syndrome antigen B	1556	1185	1.31221	0.392	0.00410362	0.0269099
ENSG00000138593	SECISBP2L	SECIS binding protein 2 like	1314	1001	1.31221	0.392	0.00213926	0.0166529
ENSG00000147416	ATP6V1B2	ATPase H+ transporting V1 subunit B2	1592	1213	1.31221	0.392	0.00203397	0.0160332
ENSG00000156411	C14orf2	chromosome 14 open reading frame 2	3234	2467	1.31039	0.39	0.00911052	0.0486132
ENSG00000075292	ZNF638	zinc finger protein 638	1946	1484	1.31039	0.39	0.00496632	0.0310746
ENSG00000154582	ELOC	elongin C	741	565	1.31039	0.39	0.00325392	0.0227918
ENSG00000138594	TMOD3	tropomodulin 3	3936	3007	1.30858	0.388	0.0047088	0.0298156
ENSG00000168246	UBTD2	ubiquitin domain containing 2	740	565	1.30858	0.388	0.00414804	0.0271198
ENSG00000130024	PHF10	PHD finger protein 10	834	636	1.30858	0.388	0.00223801	0.0172423
ENSG00000103591	AAGAB	alpha and gamma adaptin binding protein	2596	1984	1.30858	0.388	0.000800732	0.00781329
ENSG00000198492	YTHDF2	YTH N6-methyladenosine RNA binding protein 2	1165	890	1.30677	0.386	0.00873716	0.0470831
ENSG00000138443	ABI2	abl interactor 2	371	284	1.30677	0.386	0.0084295	0.0460069
ENSG00000119203	CPSF3	cleavage and polyadenylation specific factor 3	582	444	1.30677	0.386	0.00819226	0.0451147
ENSG00000253352	TUG1	taurine up-regulated 1 (non-protein coding)	2757	2110	1.30677	0.386	0.00399458	0.026373
ENSG00000155393	HEATR3	HEAT repeat containing 3	685	523	1.30677	0.386	0.00342071	0.0236525
ENSG00000116750	UCHL5	ubiquitin C-terminal hydrolase L5	820	628	1.30586	0.385	0.00766814	0.0429102
ENSG00000162923	WDR26	WD repeat domain 26	2166	1657	1.30586	0.385	0.00161277	0.0134469
ENSG00000111237	VPS29	VPS29, retromer complex component	2148	1643	1.30586	0.385	0.00137825	0.0118483
ENSG00000198692	EIF1AY	eukaryotic translation initiation factor 1A, Y-linked	935	715	1.30586	0.385	0.000354354	0.00402907
ENSG00000073921	PICALM	phosphatidylinositol binding clathrin assembly protein	4326	3315	1.30586	0.385	9.51e-05	0.00137837
ENSG00000147649	MTDH	metadherin	2688	2062	1.30405	0.383	0.00584863	0.0350998
ENSG00000145041	DCAF1	DDB1 and CUL4 associated factor 1	664	509	1.30405	0.383	0.00220654	0.017079
ENSG00000087206	UIMC1	ubiquitin interaction motif containing 1	368	282	1.30405	0.383	0.00204215	0.016076
ENSG00000165527	ARF6	ADP ribosylation factor 6	5067	3892	1.30224	0.381	0.00721291	0.0410997
ENSG00000006831	ADIPOR2	adiponectin receptor 2	3574	2744	1.30224	0.381	0.00661215	0.0383391
ENSG00000131966	ACTR10	actin related protein 10 homolog	1102	845	1.30224	0.381	0.00416632	0.0272149
ENSG00000152484	USP12	ubiquitin specific peptidase 12	1863	1431	1.30224	0.381	0.00305482	0.021808
ENSG00000150093	ITGB1	integrin subunit beta 1	9932	7629	1.30224	0.381	0.00293056	0.0211455
ENSG00000185414	MRPL30	mitochondrial ribosomal protein L30	624	479	1.30224	0.381	0.00284786	0.0207027
ENSG00000119953	SMNDC1	survival motor neuron domain containing 1	549	421	1.30044	0.379	0.00524784	0.0323367
ENSG00000170540	ARL6IP1	ADP ribosylation factor like GTPase 6 interacting protein 1	4476	3442	1.30044	0.379	0.00473374	0.0299301
ENSG00000108651	UTP6	UTP6, small subunit processome component	820	630	1.30044	0.379	0.00316008	0.0223224
ENSG00000124767	GLO1	glyoxalase I	1433	1103	1.29864	0.377	0.00752758	0.0423815
ENSG00000184007	PTP4A2	protein tyrosine phosphatase type IVA, member 2	5324	4098	1.29864	0.377	0.00674615	0.0390125
ENSG00000145349	CAMK2D	calcium/calmodulin dependent protein kinase II delta	2093	1611	1.29864	0.377	0.00559758	0.0338489
ENSG00000170027	YWHAG	tyrosine 3-monooxygenase/tryptophan 5-monooxygenase activation protein gamma	3988	3073	1.29864	0.377	0.00536326	0.0327951
ENSG00000124098	FAM210B	family with sequence similarity 210 member B	854	657	1.29864	0.377	0.0029184	0.0210825
ENSG00000135272	MDFIC	MyoD family inhibitor domain containing	526	405	1.29864	0.377	0.0028608	0.0207739
ENSG00000132485	ZRANB2	zinc finger RANBP2-type containing 2	3103	2391	1.29684	0.375	0.00821044	0.0451894
ENSG00000177485	ZBTB33	zinc finger and BTB domain containing 33	512	396	1.29684	0.375	0.00276168	0.0201845
ENSG00000257218	GATC	glutamyl-tRNA amidotransferase subunit C	710	548	1.29504	0.373	0.00869453	0.0469548
ENSG00000165525	NEMF	nuclear export mediator factor	1120	865	1.29504	0.373	0.0080975	0.0447754
ENSG00000125629	INSIG2	insulin induced gene 2	501	388	1.29504	0.373	0.00761847	0.0427417
ENSG00000131051	RBM39	RNA binding motif protein 39	4094	3160	1.29504	0.373	0.00391212	0.0260371
ENSG00000132963	POMP	proteasome maturation protein	3061	2364	1.29504	0.373	0.00315093	0.0222875
ENSG00000105176	URI1	URI1, prefoldin like chaperone	974	751	1.29504	0.373	0.00300275	0.0215242
ENSG00000263465	SRSF8	serine and arginine rich splicing factor 8	1283	990	1.29504	0.373	0.00122747	0.0108223
ENSG00000136897	MRPL50	mitochondrial ribosomal protein L50	536	415	1.29325	0.371	0.00845399	0.0461117
ENSG00000148481	MINDY3	MINDY lysine 48 deubiquitinase 3	446	344	1.29325	0.371	0.00435513	0.0280125
ENSG00000131507	NDFIP1	Nedd4 family interacting protein 1	2229	1723	1.29325	0.371	0.00403324	0.026578
ENSG00000163848	ZNF148	zinc finger protein 148	1172	907	1.29325	0.371	0.00227206	0.0173999
ENSG00000123106	CCDC91	coiled-coil domain containing 91	388	299	1.29325	0.371	0.00210006	0.0164135
ENSG00000122068	FYTTD1	forty-two-three domain containing 1	965	746	1.29325	0.371	0.00200541	0.015851
ENSG00000162521	RBBP4	RB binding protein 4, chromatin remodeling factor	2900	2242	1.29325	0.371	0.00131313	0.0114113
ENSG00000115561	CHMP3	charged multivesicular body protein 3	1993	1541	1.29235	0.37	0.00660409	0.038305
ENSG00000170248	PDCD6IP	programmed cell death 6 interacting protein	6036	4670	1.29235	0.37	0.000863761	0.00833522
ENSG00000255529	POLR2M	RNA polymerase II subunit M	642	497	1.29056	0.368	0.00746378	0.0421036
ENSG00000109445	ZNF330	zinc finger protein 330	554	429	1.29056	0.368	0.00476439	0.0300804
ENSG00000144848	ATG3	autophagy related 3	990	767	1.29056	0.368	0.00447665	0.0286402
ENSG00000205581	HMGN1	high mobility group nucleosome binding domain 1	4387	3399	1.29056	0.368	0.00428195	0.0276825
ENSG00000177683	THAP5	THAP domain containing 5	549	426	1.29056	0.368	0.00191381	0.0153325
ENSG00000169714	CNBP	CCHC-type zinc finger nucleic acid binding protein	4864	3771	1.29056	0.368	0.000668502	0.00676868
ENSG00000120616	EPC1	enhancer of polycomb homolog 1	891	691	1.29056	0.368	0.000647871	0.00660188
ENSG00000120686	UFM1	ubiquitin fold modifier 1	1972	1531	1.28877	0.366	0.00453725	0.0289602
ENSG00000123728	RAP2C	RAP2C, member of RAS oncogene family	900	699	1.28877	0.366	0.00446214	0.0285642
ENSG00000144827	ABHD10	abhydrolase domain containing 10	586	456	1.28699	0.364	0.00946345	0.04989
ENSG00000185104	FAF1	Fas associated factor 1	695	539	1.28699	0.364	0.00856186	0.0464825
ENSG00000110429	FBXO3	F-box protein 3	1134	881	1.28699	0.364	0.00389523	0.0259821
ENSG00000152700	SAR1B	secretion associated Ras related GTPase 1B	1976	1535	1.28699	0.364	0.00348649	0.0239316
ENSG00000181751	C5orf30	chromosome 5 open reading frame 30	2156	1679	1.28521	0.362	0.00938944	0.049604
ENSG00000057608	GDI2	GDP dissociation inhibitor 2	7002	5445	1.28521	0.362	0.00694688	0.0399354
ENSG00000114744	COMMD2	COMM domain containing 2	503	391	1.28521	0.362	0.00691567	0.0397953
ENSG00000137509	PRCP	prolylcarboxypeptidase	1024	797	1.28521	0.362	0.0061309	0.036283
ENSG00000033800	PIAS1	protein inhibitor of activated STAT 1	830	646	1.28521	0.362	0.00205782	0.0161847
ENSG00000111790	FGFR1OP2	FGFR1 oncogene partner 2	744	578	1.28521	0.362	0.000815686	0.00794774
ENSG00000066583	ISOC1	isochorismatase domain containing 1	563	438	1.28521	0.362	0.000694476	0.00695511
ENSG00000109466	KLHL2	kelch like family member 2	332	259	1.28343	0.36	0.00809504	0.0447754
ENSG00000155096	AZIN1	antizyme inhibitor 1	2942	2291	1.28343	0.36	0.00753413	0.0424047
ENSG00000175348	TMEM9B	TMEM9 domain family member B	2522	1965	1.28343	0.36	0.00390296	0.0260048
ENSG00000103769	RAB11A	RAB11A, member RAS oncogene family	4666	3636	1.28343	0.36	0.00250846	0.0188145
ENSG00000113384	GOLPH3	golgi phosphoprotein 3	2053	1600	1.28165	0.358	0.00659182	0.0382592
ENSG00000106028	SSBP1	single stranded DNA binding protein 1	1608	1253	1.28165	0.358	0.00654635	0.0381092
ENSG00000170860	LSM3	LSM3 homolog, U6 small nuclear RNA and mRNA degradation associated	1383	1078	1.28165	0.358	0.00450437	0.0288029
ENSG00000114978	MOB1A	MOB kinase activator 1A	3902	3045	1.28165	0.358	0.000698484	0.00698724
ENSG00000163257	DCAF16	DDB1 and CUL4 associated factor 16	1302	1018	1.28076	0.357	0.00924482	0.0490817
ENSG00000135655	USP15	ubiquitin specific peptidase 15	1180	922	1.27899	0.355	0.0067451	0.0390125
ENSG00000016864	GLT8D1	glycosyltransferase 8 domain containing 1	550	430	1.27721	0.353	0.00921578	0.0489914
ENSG00000131023	LATS1	large tumor suppressor kinase 1	687	537	1.27721	0.353	0.00860557	0.0465751
ENSG00000107854	TNKS2	tankyrase 2	1262	989	1.27721	0.353	0.0074069	0.0418618
ENSG00000109171	SLAIN2	SLAIN motif family member 2	1241	972	1.27721	0.353	0.0071016	0.0406111
ENSG00000035403	VCL	vinculin	1603	1256	1.27544	0.351	0.00948661	0.0499412
ENSG00000100030	MAPK1	mitogen-activated protein kinase 1	2318	1817	1.27544	0.351	0.00852592	0.0463449
ENSG00000122545	39326	septin 7	2594	2033	1.27544	0.351	0.00632676	0.0371348
ENSG00000095787	WAC	WW domain containing adaptor with coiled-coil	2579	2023	1.27544	0.351	0.00385895	0.025788
ENSG00000132388	UBE2G1	ubiquitin conjugating enzyme E2 G1	1200	941	1.27544	0.351	0.00221353	0.0171091
ENSG00000126773	PCNX4	pecanex homolog 4	634	496	1.27544	0.351	0.00202127	0.0159482
ENSG00000124333	VAMP7	vesicle associated membrane protein 7	943	741	1.27368	0.349	0.00837556	0.0458557
ENSG00000143933	CALM2	calmodulin 2	16991	13342	1.27368	0.349	0.00531467	0.0326006
ENSG00000123575	FAM199X	family with sequence similarity 199, X-linked	1219	957	1.27368	0.349	0.00525216	0.0323421
ENSG00000133193	FAM104A	family with sequence similarity 104 member A	439	344	1.27368	0.349	0.00355781	0.0242711
ENSG00000163798	SLC4A1AP	solute carrier family 4 member 1 adaptor protein	443	348	1.27191	0.347	0.00730805	0.0414526
ENSG00000164329	PAPD4	poly(A) RNA polymerase D4, non-canonical	990	778	1.27191	0.347	0.00728763	0.0413771
ENSG00000106993	CDC37L1	cell division cycle 37 like 1	344	270	1.27191	0.347	0.00645869	0.037712
ENSG00000168876	ANKRD49	ankyrin repeat domain 49	440	346	1.26927	0.344	0.00437939	0.0281376
ENSG00000149100	EIF3M	eukaryotic translation initiation factor 3 subunit M	2246	1769	1.26927	0.344	0.00435672	0.0280125
ENSG00000167635	ZNF146	zinc finger protein 146	1507	1187	1.26927	0.344	0.00377577	0.025379
ENSG00000120837	NFYB	nuclear transcription factor Y subunit beta	613	481	1.26927	0.344	0.00360021	0.0244814
ENSG00000115539	PDCL3	phosducin like 3	560	442	1.26751	0.342	0.00749117	0.0422309
ENSG00000100568	VTI1B	vesicle transport through interaction with t-SNAREs 1B	2090	1649	1.26751	0.342	0.00700044	0.0401772
ENSG00000153187	HNRNPU	heterogeneous nuclear ribonucleoprotein U	10459	8252	1.26751	0.342	0.00423707	0.0275166
ENSG00000035687	ADSS	adenylosuccinate synthase	1296	1025	1.26576	0.34	0.00431835	0.0278478
ENSG00000116747	TROVE2	TROVE domain family member 2	828	654	1.26576	0.34	0.00413994	0.0270871
ENSG00000160131	VMA21	VMA21, vacuolar ATPase assembly factor	652	516	1.26225	0.336	0.00916397	0.0487666
ENSG00000176261	ZBTB8OS	zinc finger and BTB domain containing 8 opposite strand	692	547	1.26225	0.336	0.00566755	0.0341812
ENSG00000166233	ARIH1	ariadne RBR E3 ubiquitin protein ligase 1	1284	1017	1.26225	0.336	0.00347911	0.023907
ENSG00000100796	PPP4R3A	protein phosphatase 4 regulatory subunit 3A	1894	1508	1.2544	0.327	0.00817288	0.045085
ENSG00000112697	TMEM30A	transmembrane protein 30A	4149	3315	1.2518	0.324	0.00927031	0.0491678
ENSG00000211460	TSN	translin	1474	1178	1.2518	0.324	0.00501387	0.0313049
ENSG00000105993	DNAJB6	DnaJ heat shock protein family (Hsp40) member B6	1392	1113	1.25006	0.322	0.00935434	0.0494783
ENSG00000077254	USP33	ubiquitin specific peptidase 33	1440	1152	1.25006	0.322	0.00894194	0.047906
ENSG00000091009	RBM27	RNA binding motif protein 27	594	475	1.25006	0.322	0.0060396	0.0358885
ENSG00000100764	PSMC1	proteasome 26S subunit, ATPase 1	2021	1615	1.25006	0.322	0.00551356	0.0334661
ENSG00000186063	AIDA	axin interactor, dorsalization associated	1156	927	1.2466	0.318	0.00841458	0.0459541
ENSG00000121774	KHDRBS1	KH RNA binding domain containing, signal transduction associated 1	2599	2085	1.2466	0.318	0.00670591	0.0388183
ENSG00000139154	AEBP2	AE binding protein 2	504	404	1.2466	0.318	0.00465669	0.0296036
ENSG00000124209	RAB22A	RAB22A, member RAS oncogene family	1147	922	1.24574	0.317	0.00347219	0.0238992
ENSG00000182220	ATP6AP2	ATPase H+ transporting accessory protein 2	2648	2132	1.24229	0.313	0.0061737	0.0364868
ENSG00000139726	DENR	density regulated re-initiation and release factor	1320	1064	1.23885	0.309	0.00738539	0.0417693
ENSG00000197343	ZNF655	zinc finger protein 655	1692	1366	1.23799	0.308	0.00847426	0.0461593
ENSG00000084093	REST	RE1 silencing transcription factor	1020	823	1.23799	0.308	0.00663409	0.0384535
ENSG00000108946	PRKAR1A	protein kinase cAMP-dependent type I regulatory subunit alpha	2696	2181	1.23628	0.306	0.00177127	0.0144177
ENSG00000159322	ADPGK	ADP dependent glucokinase	689	563	1.22688	0.295	0.00900379	0.0481783
ENSG00000102910	LONP2	lon peptidase 2, peroxisomal	1618	1317	1.22688	0.295	0.0065112	0.037968
ENSG00000161217	PCYT1A	phosphate cytidylyltransferase 1, choline, alpha	1182	975	1.21251	0.278	0.00722359	0.0411337
ENSG00000115685	PPP1R7	protein phosphatase 1 regulatory subunit 7	894	1111	0.804408	-0.314	0.00241348	0.0182116
ENSG00000112763	BTN2A1	butyrophilin subfamily 2 member A1	402	500	0.803294	-0.316	0.00457099	0.0291543
ENSG00000167323	STIM1	stromal interaction molecule 1	536	671	0.80107	-0.32	0.00241558	0.0182195
ENSG00000031698	SARS	seryl-tRNA synthetase	1372	1713	0.79996	-0.322	0.00734978	0.0416105
ENSG00000100353	EIF3D	eukaryotic translation initiation factor 3 subunit D	1898	2373	0.799406	-0.323	0.00796649	0.0442397
ENSG00000139531	SUOX	sulfite oxidase	294	368	0.797192	-0.327	0.00680315	0.0392901
ENSG00000004142	POLDIP2	DNA polymerase delta interacting protein 2	803	1009	0.796088	-0.329	0.00338003	0.0234869
ENSG00000143486	EIF2D	eukaryotic translation initiation factor 2D	432	545	0.791686	-0.337	0.00724813	0.0412466
ENSG00000087365	SF3B2	splicing factor 3b subunit 2	1402	1778	0.787854	-0.344	0.00538427	0.0328514
ENSG00000133935	ERG28	ergosterol biosynthesis 28 homolog	428	544	0.784584	-0.35	0.00460725	0.0293427
ENSG00000090863	GLG1	golgi glycoprotein 1	1736	2222	0.781328	-0.356	0.00108638	0.00988889
ENSG00000174243	DDX23	DEAD-box helicase 23	974	1253	0.777546	-0.363	0.00487332	0.0306353
ENSG00000178449	COX14	COX14, cytochrome c oxidase assembly factor	358	463	0.776469	-0.365	0.00892686	0.0478692
ENSG00000006042	TMEM98	transmembrane protein 98	889	1148	0.773782	-0.37	0.00876375	0.0472119
ENSG00000110514	MADD	MAP kinase activating death domain	458	595	0.772175	-0.373	0.00251884	0.0188762
ENSG00000133884	DPF2	double PHD fingers 2	266	346	0.77164	-0.374	0.00513673	0.0318445
ENSG00000167548	KMT2D	lysine methyltransferase 2D	654	850	0.771105	-0.375	0.00859212	0.0465652
ENSG00000135778	NTPCR	nucleoside-triphosphatase, cancer-related	476	617	0.771105	-0.375	0.00521617	0.0322112
ENSG00000166887	VPS39	VPS39, HOPS complex subunit	532	689	0.771105	-0.375	0.00384624	0.0257339
ENSG00000197157	SND1	staphylococcal nuclease and tudor domain containing 1	1059	1376	0.770037	-0.377	0.00893234	0.0478839
ENSG00000179222	MAGED1	MAGE family member D1	628	816	0.770037	-0.377	0.00309569	0.0220099
ENSG00000167283	ATP5L	ATP synthase, H+ transporting, mitochondrial Fo complex subunit G	3863	5017	0.770037	-0.377	0.000506731	0.00538992
ENSG00000197448	GSTK1	glutathione S-transferase kappa 1	2124	2759	0.76897	-0.379	0.00590495	0.0353165
ENSG00000215012	RTL10	retrotransposon Gag like 10	172	224	0.768438	-0.38	0.00799367	0.0443624
ENSG00000204568	MRPS18B	mitochondrial ribosomal protein S18B	787	1025	0.767905	-0.381	0.00603294	0.0358611
ENSG00000103091	WDR59	WD repeat domain 59	281	366	0.767373	-0.382	0.0092977	0.0492981
ENSG00000143799	PARP1	poly(ADP-ribose) polymerase 1	931	1215	0.766841	-0.383	0.00791182	0.0439781
ENSG00000183020	AP2A2	adaptor related protein complex 2 alpha 2 subunit	295	386	0.76631	-0.384	0.00720438	0.0410779
ENSG00000049656	CLPTM1L	CLPTM1 like	478	624	0.765779	-0.385	0.00716348	0.0409114
ENSG00000087274	ADD1	adducin 1	1325	1730	0.765779	-0.385	0.00545337	0.033172
ENSG00000055070	SZRD1	SUZ RNA binding domain containing 1	1272	1664	0.764718	-0.387	0.00424388	0.0275301
ENSG00000159352	PSMD4	proteasome 26S subunit, non-ATPase 4	1048	1377	0.761017	-0.394	0.00320798	0.0225877
ENSG00000174444	RPL4	ribosomal protein L4	10002	13152	0.760489	-0.395	0.0040921	0.0268545
ENSG00000107862	GBF1	golgi brefeldin A resistant guanine nucleotide exchange factor 1	803	1058	0.759962	-0.396	0.00401068	0.0264693
ENSG00000114745	GORASP1	golgi reassembly stacking protein 1	659	870	0.75891	-0.398	0.000229561	0.0028312
ENSG00000177963	RIC8A	RIC8 guanine nucleotide exchange factor A	462	611	0.756808	-0.402	0.00431395	0.0278297
ENSG00000108469	RECQL5	RecQ like helicase 5	177	235	0.754713	-0.406	0.00819119	0.0451147
ENSG00000196821	C6orf106	chromosome 6 open reading frame 106	940	1247	0.75419	-0.407	0.00705374	0.0404371
ENSG00000167461	RAB8A	RAB8A, member RAS oncogene family	963	1279	0.753145	-0.409	0.000586428	0.00608937
ENSG00000181789	COPG1	coatomer protein complex subunit gamma 1	2048	2724	0.752102	-0.411	0.00272468	0.0200237
ENSG00000177663	IL17RA	interleukin 17 receptor A	370	494	0.75106	-0.413	0.000921481	0.00880471
ENSG00000182446	NPLOC4	NPL4 homolog, ubiquitin recognition factor	637	851	0.748461	-0.418	0.00101394	0.00942531
ENSG00000100150	DEPDC5	DEP domain containing 5	207	278	0.747943	-0.419	0.00859669	0.0465652
ENSG00000100647	SUSD6	sushi domain containing 6	902	1208	0.747943	-0.419	0.00141835	0.012109
ENSG00000100227	POLDIP3	DNA polymerase delta interacting protein 3	630	844	0.747425	-0.42	0.00245161	0.0184356
ENSG00000121289	CEP89	centrosomal protein 89	167	223	0.746907	-0.421	0.00520291	0.0321521
ENSG00000126217	MCF2L	MCF.2 cell line derived transforming sequence like	172	230	0.746389	-0.422	0.00396057	0.0262258
ENSG00000172053	QARS	glutaminyl-tRNA synthetase	1887	2538	0.743291	-0.428	0.000296663	0.00348185
ENSG00000112658	SRF	serum response factor	315	424	0.742776	-0.429	0.00459142	0.0292525
ENSG00000160695	VPS11	VPS11, CORVET/HOPS core subunit	257	347	0.742776	-0.429	0.00174908	0.0142903
ENSG00000178035	IMPDH2	inosine monophosphate dehydrogenase 2	1051	1415	0.742262	-0.43	0.00397374	0.026295
ENSG00000070614	NDST1	N-deacetylase and N-sulfotransferase 1	444	598	0.741747	-0.431	0.00629801	0.0370337
ENSG00000115677	HDLBP	high density lipoprotein binding protein	2884	3896	0.74072	-0.433	0.00369292	0.0249565
ENSG00000128928	IVD	isovaleryl-CoA dehydrogenase	844	1139	0.74072	-0.433	0.000737824	0.00727254
ENSG00000010803	SCMH1	sex comb on midleg homolog 1 (Drosophila)	220	298	0.740207	-0.434	0.00535044	0.0327625
ENSG00000092010	PSME1	proteasome activator subunit 1	2295	3102	0.739694	-0.435	0.0038265	0.025617
ENSG00000105053	VRK3	vaccinia related kinase 3	443	599	0.739694	-0.435	0.00254662	0.0190436
ENSG00000114735	HEMK1	HemK methyltransferase family member 1	238	322	0.739181	-0.436	0.00206232	0.0162055
ENSG00000132405	TBC1D14	TBC1 domain family member 14	566	768	0.738157	-0.438	0.00291233	0.0210575
ENSG00000182541	LIMK2	LIM domain kinase 2	876	1186	0.737646	-0.439	8.34e-05	0.0012342
ENSG00000043143	JADE2	jade family PHD finger 2	212	289	0.737135	-0.44	0.00340957	0.0236349
ENSG00000140521	POLG	DNA polymerase gamma, catalytic subunit	397	539	0.737135	-0.44	0.000336394	0.00385244
ENSG00000129255	MPDU1	mannose-P-dolichol utilization defect 1	864	1175	0.734584	-0.445	0.0042436	0.0275301
ENSG00000179218	CALR	calreticulin	8082	11004	0.734075	-0.446	0.00468179	0.0296876
ENSG00000162231	NXF1	nuclear RNA export factor 1	579	788	0.734075	-0.446	0.00273183	0.0200442
ENSG00000204272	NBDY	negative regulator of P-body association	162	222	0.733567	-0.447	0.00900826	0.0481874
ENSG00000100138	SNU13	small nuclear ribonucleoprotein 13	829	1129	0.733567	-0.447	0.00488916	0.0307017
ENSG00000019144	PHLDB1	pleckstrin homology like domain family B member 1	568	777	0.73255	-0.449	0.00687349	0.0395916
ENSG00000125741	OPA3	OPA3, outer mitochondrial membrane lipid metabolism regulator	323	443	0.731536	-0.451	0.00264455	0.0195873
ENSG00000103512	NOMO1	NODAL modulator 1	398	543	0.731029	-0.452	0.00354224	0.0242192
ENSG00000117305	HMGCL	3-hydroxymethyl-3-methylglutaryl-CoA lyase	757	1035	0.731029	-0.452	0.000997175	0.00930412
ENSG00000187147	RNF220	ring finger protein 220	510	700	0.730522	-0.453	0.00627589	0.0369533
ENSG00000068400	GRIPAP1	GRIP1 associated protein 1	436	597	0.7285	-0.457	0.00518073	0.0320603
ENSG00000158158	CNNM4	cyclin and CBS domain divalent metal cation transport mediator 4	1660	2278	0.7285	-0.457	0.0014563	0.0123846
ENSG00000172432	GTPBP2	GTP binding protein 2	610	838	0.7285	-0.457	0.00043057	0.00472356
ENSG00000104324	CPQ	carboxypeptidase Q	249	343	0.72749	-0.459	0.00585395	0.0351197
ENSG00000100109	TFIP11	tuftelin interacting protein 11	236	326	0.72749	-0.459	0.00527644	0.0324801
ENSG00000158793	NIT1	nitrilase 1	583	801	0.72749	-0.459	0.00509884	0.0317108
ENSG00000143294	PRCC	papillary renal cell carcinoma (translocation-associated)	256	354	0.72749	-0.459	0.00167588	0.0138541
ENSG00000180901	KCTD2	potassium channel tetramerization domain containing 2	232	320	0.726986	-0.46	0.00274947	0.0201298
ENSG00000158526	TSR2	TSR2, ribosome maturation factor	567	782	0.726986	-0.46	0.00195486	0.015557
ENSG00000141026	MED9	mediator complex subunit 9	150	206	0.725979	-0.462	0.0021228	0.0165542
ENSG00000131043	AAR2	AAR2 splicing factor homolog	195	270	0.724973	-0.464	0.00868938	0.0469415
ENSG00000144028	SNRNP200	small nuclear ribonucleoprotein U5 subunit 200	1205	1663	0.724973	-0.464	0.00675209	0.0390339
ENSG00000110619	CARS	cysteinyl-tRNA synthetase	344	474	0.724973	-0.464	0.00627434	0.0369533
ENSG00000204560	DHX16	DEAH-box helicase 16	332	458	0.723969	-0.466	0.00608637	0.0360928
ENSG00000116604	MEF2D	myocyte enhancer factor 2D	460	636	0.723467	-0.467	0.00873101	0.0470673
ENSG00000186204	CYP4F12	cytochrome P450 family 4 subfamily F member 12	724	1000	0.723467	-0.467	0.00802178	0.0444902
ENSG00000198242	RPL23A	ribosomal protein L23a	8805	12166	0.723467	-0.467	0.00305784	0.0218163
ENSG00000100897	DCAF11	DDB1 and CUL4 associated factor 11	1330	1841	0.723467	-0.467	0.000285274	0.00336855
ENSG00000167110	GOLGA2	golgin A2	768	1063	0.722966	-0.468	0.00102134	0.00947897
ENSG00000072682	P4HA2	prolyl 4-hydroxylase subunit alpha 2	465	644	0.722465	-0.469	0.00828753	0.0455163
ENSG00000108826	MRPL27	mitochondrial ribosomal protein L27	670	928	0.722465	-0.469	0.00563599	0.0340694
ENSG00000135148	TRAFD1	TRAF-type zinc finger domain containing 1	496	688	0.722465	-0.469	0.00551513	0.0334661
ENSG00000110200	ANAPC15	anaphase promoting complex subunit 15	383	529	0.722465	-0.469	0.00393288	0.0261041
ENSG00000126107	HECTD3	HECT domain E3 ubiquitin protein ligase 3	888	1227	0.722465	-0.469	0.000957079	0.00905572
ENSG00000143409	MINDY1	MINDY lysine 48 deubiquitinase 1	414	572	0.721965	-0.47	0.00636168	0.0372658
ENSG00000101150	TPD52L2	tumor protein D52 like 2	517	716	0.721965	-0.47	0.00226819	0.0173897
ENSG00000198951	NAGA	alpha-N-acetylgalactosaminidase	340	473	0.721965	-0.47	0.00110643	0.0100239
ENSG00000143390	RFX5	regulatory factor X5	344	477	0.721464	-0.471	0.00199687	0.0157978
ENSG00000095539	SEMA4G	semaphorin 4G	938	1302	0.720964	-0.472	0.00119643	0.010625
ENSG00000111275	ALDH2	aldehyde dehydrogenase 2 family (mitochondrial)	2606	3615	0.720465	-0.473	0.00182668	0.0147792
ENSG00000130723	PRRC2B	proline rich coiled-coil 2B	796	1106	0.719966	-0.474	0.000823703	0.00800833
ENSG00000273611	ZNHIT3	zinc finger HIT-type containing 3	278	386	0.719467	-0.475	0.00263971	0.0195722
ENSG00000149480	MTA2	metastasis associated 1 family member 2	940	1306	0.719467	-0.475	0.00097933	0.00919654
ENSG00000180104	EXOC3	exocyst complex component 3	281	391	0.719467	-0.475	0.000603929	0.00623038
ENSG00000166228	PCBD1	pterin-4 alpha-carbinolamine dehydratase 1	340	472	0.71847	-0.477	0.000922345	0.00880815
ENSG00000011304	PTBP1	polypyrimidine tract binding protein 1	1184	1651	0.717475	-0.479	0.00225757	0.0173451
ENSG00000008130	NADK	NAD kinase	532	742	0.717475	-0.479	0.000213323	0.00265909
ENSG00000177646	ACAD9	acyl-CoA dehydrogenase family member 9	240	334	0.716481	-0.481	0.000529214	0.00557395
ENSG00000214160	ALG3	ALG3, alpha-1,3- mannosyltransferase	142	199	0.715488	-0.483	0.00779872	0.0434738
ENSG00000138629	UBL7	ubiquitin like 7	234	327	0.715488	-0.483	0.00754982	0.042441
ENSG00000065000	AP3D1	adaptor related protein complex 3 delta 1 subunit	364	508	0.715488	-0.483	0.0054885	0.0333393
ENSG00000161267	BDH1	3-hydroxybutyrate dehydrogenase 1	1054	1475	0.715488	-0.483	0.00049952	0.00534248
ENSG00000185825	BCAP31	B-cell receptor associated protein 31	2074	2901	0.715488	-0.483	0.000106972	0.00152359
ENSG00000163159	VPS72	vacuolar protein sorting 72 homolog	176	246	0.714002	-0.486	0.00322261	0.0226328
ENSG00000125733	TRIP10	thyroid hormone receptor interactor 10	277	386	0.714002	-0.486	0.00182474	0.0147704
ENSG00000166716	ZNF592	zinc finger protein 592	380	533	0.714002	-0.486	3.67e-05	0.000625083
ENSG00000064787	BCAS1	breast carcinoma amplified sequence 1	2245	3147	0.713507	-0.487	0.00499916	0.0312242
ENSG00000171124	FUT3	fucosyltransferase 3 (Lewis blood group)	1476	2070	0.713507	-0.487	0.0035125	0.0240629
ENSG00000102181	CD99L2	CD99 molecule like 2	181	254	0.712519	-0.489	0.00499181	0.0311895
ENSG00000157191	NECAP2	NECAP endocytosis associated 2	338	475	0.712025	-0.49	0.00366905	0.024841
ENSG00000197746	PSAP	prosaposin	7585	10654	0.711532	-0.491	0.00636307	0.0372658
ENSG00000170004	CHD3	chromodomain helicase DNA binding protein 3	1047	1471	0.711532	-0.491	0.00483819	0.0304692
ENSG00000198728	LDB1	LIM domain binding 1	168	236	0.711532	-0.491	0.00404737	0.0266611
ENSG00000213719	CLIC1	chloride intracellular channel 1	4830	6785	0.711532	-0.491	0.00171649	0.0140635
ENSG00000013563	DNASE1L1	deoxyribonuclease 1 like 1	194	273	0.711039	-0.492	0.00517003	0.0320174
ENSG00000137200	CMTR1	cap methyltransferase 1	390	551	0.711039	-0.492	0.00409007	0.0268545
ENSG00000204128	C2orf72	chromosome 2 open reading frame 72	515	723	0.711039	-0.492	0.00139967	0.0119769
ENSG00000168090	COPS6	COP9 signalosome subunit 6	455	640	0.711039	-0.492	0.00130633	0.0113655
ENSG00000071462	BUD23	BUD23, rRNA methyltransferase and ribosome maturation factor	472	664	0.710546	-0.493	0.000144227	0.00192994
ENSG00000100395	L3MBTL2	L3MBTL2, polycomb repressive complex 1 subunit	204	288	0.709562	-0.495	0.00409027	0.0268545
ENSG00000130560	UBAC1	UBA domain containing 1	190	267	0.709562	-0.495	0.00337606	0.0234731
ENSG00000129245	FXR2	FMR1 autosomal homolog 2	224	316	0.709562	-0.495	0.000416134	0.00459113
ENSG00000171302	CANT1	calcium activated nucleotidase 1	1377	1939	0.70907	-0.496	0.00173936	0.0142175
ENSG00000185475	TMEM179B	transmembrane protein 179B	261	369	0.708579	-0.497	0.00877418	0.0472244
ENSG00000196123	KIAA0895L	KIAA0895 like	155	218	0.708579	-0.497	0.00412042	0.0269796
ENSG00000176087	SLC35A4	solute carrier family 35 member A4	662	934	0.708579	-0.497	0.000727856	0.00720681
ENSG00000130724	CHMP2A	charged multivesicular body protein 2A	1010	1427	0.708088	-0.498	0.00698881	0.0401339
ENSG00000006611	USH1C	USH1 protein network component harmonin	1090	1539	0.708088	-0.498	0.000112691	0.00158319
ENSG00000149792	MRPL49	mitochondrial ribosomal protein L49	470	664	0.707597	-0.499	0.00346105	0.0238507
ENSG00000157593	SLC35B2	solute carrier family 35 member B2	225	318	0.707107	-0.5	0.00870708	0.0469935
ENSG00000106608	URGCP	upregulator of cell proliferation	294	414	0.707107	-0.5	0.005912	0.0353466
ENSG00000144591	GMPPA	GDP-mannose pyrophosphorylase A	413	584	0.706127	-0.502	4.24e-06	0.000110367
ENSG00000181222	POLR2A	RNA polymerase II subunit A	980	1389	0.705149	-0.504	0.000933177	0.00889215
ENSG00000100345	MYH9	myosin heavy chain 9	2892	4105	0.70466	-0.505	0.00338706	0.0235161
ENSG00000224597	SVIL-AS1	SVIL antisense RNA 1	121	172	0.70466	-0.505	0.00194419	0.0155216
ENSG00000197324	LRP10	LDL receptor related protein 10	1238	1758	0.704172	-0.506	0.00343005	0.0236931
ENSG00000085733	CTTN	cortactin	1336	1896	0.704172	-0.506	6.59e-05	0.0010084
ENSG00000117419	ERI3	ERI1 exoribonuclease family member 3	176	250	0.703684	-0.507	0.00158287	0.0132482
ENSG00000120725	SIL1	SIL1 nucleotide exchange factor	144	205	0.703197	-0.508	0.00541714	0.0329975
ENSG00000160310	PRMT2	protein arginine methyltransferase 2	436	621	0.703197	-0.508	0.00343579	0.0237234
ENSG00000162430	SELENON	selenoprotein N	168	239	0.703197	-0.508	0.00242666	0.0182802
ENSG00000158109	TPRG1L	tumor protein p63 regulated 1 like	656	935	0.701736	-0.511	4.47e-05	0.000737915
ENSG00000136279	DBNL	drebrin like	399	568	0.70125	-0.512	0.00948801	0.0499412
ENSG00000106244	PDAP1	PDGFA associated protein 1	1162	1659	0.700764	-0.513	0.00108789	0.00989688
ENSG00000108219	TSPAN14	tetraspanin 14	619	883	0.699793	-0.515	5.42e-06	0.000131489
ENSG00000103423	DNAJA3	DnaJ heat shock protein family (Hsp40) member A3	264	377	0.698823	-0.517	0.00209347	0.0163766
ENSG00000167118	URM1	ubiquitin related modifier 1	438	627	0.698823	-0.517	0.000622058	0.00639852
ENSG00000184857	TMEM186	transmembrane protein 186	162	232	0.697855	-0.519	0.0065134	0.037968
ENSG00000110442	COMMD9	COMM domain containing 9	190	271	0.697855	-0.519	0.00326337	0.0228214
ENSG00000131242	RAB11FIP4	RAB11 family interacting protein 4	740	1061	0.697855	-0.519	0.000130013	0.00177094
ENSG00000108439	PNPO	pyridoxamine 5'-phosphate oxidase	186	266	0.697372	-0.52	0.00325069	0.0227783
ENSG00000133313	CNDP2	carnosine dipeptidase 2	1860	2669	0.696889	-0.521	6.09e-07	2.27e-05
ENSG00000204310	AGPAT1	1-acylglycerol-3-phosphate O-acyltransferase 1	343	493	0.696406	-0.522	0.00483479	0.0304692
ENSG00000126247	CAPNS1	calpain small subunit 1	2804	4027	0.696406	-0.522	0.00167922	0.0138621
ENSG00000100325	ASCC2	activating signal cointegrator 1 complex subunit 2	366	526	0.696406	-0.522	0.000318269	0.00370064
ENSG00000146701	MDH2	malate dehydrogenase 2	1078	1547	0.695923	-0.523	0.0047022	0.0298015
ENSG00000168488	ATXN2L	ataxin 2 like	409	588	0.695441	-0.524	0.00107207	0.00980405
ENSG00000196961	AP2A1	adaptor related protein complex 2 alpha 1 subunit	169	242	0.694959	-0.525	0.00169054	0.0139228
ENSG00000184634	MED12	mediator complex subunit 12	208	300	0.694959	-0.525	0.001422	0.0121342
ENSG00000153786	ZDHHC7	zinc finger DHHC-type containing 7	847	1221	0.694478	-0.526	0.000112045	0.00158039
ENSG00000162517	PEF1	penta-EF-hand domain containing 1	285	412	0.693996	-0.527	0.00162341	0.0135228
ENSG00000182054	IDH2	isocitrate dehydrogenase (NADP(+)) 2, mitochondrial	542	780	0.693996	-0.527	0.0015895	0.0132782
ENSG00000167085	PHB	prohibitin	2037	2936	0.693996	-0.527	0.000135118	0.00182906
ENSG00000178802	MPI	mannose phosphate isomerase	439	633	0.693035	-0.529	0.00241149	0.0182044
ENSG00000241468	ATP5J2	ATP synthase, H+ transporting, mitochondrial Fo complex subunit F2	820	1185	0.693035	-0.529	0.00156069	0.0130876
ENSG00000102316	MAGED2	MAGE family member D2	468	677	0.693035	-0.529	0.000331336	0.00380198
ENSG00000140332	TLE3	transducin like enhancer of split 3	420	607	0.692555	-0.53	0.00788834	0.0438894
ENSG00000091947	TMEM101	transmembrane protein 101	163	236	0.692555	-0.53	0.0055701	0.0337286
ENSG00000065802	ASB1	ankyrin repeat and SOCS box containing 1	238	344	0.692075	-0.531	0.00103187	0.00954127
ENSG00000162104	ADCY9	adenylate cyclase 9	178	258	0.691116	-0.533	0.00864216	0.0467297
ENSG00000105953	OGDH	oxoglutarate dehydrogenase	998	1444	0.691116	-0.533	0.0023652	0.0179256
ENSG00000274523	RCC1L	RCC1 like	177	257	0.690637	-0.534	0.00270758	0.0199568
ENSG00000179335	CLK3	CDC like kinase 3	328	475	0.690159	-0.535	0.00114507	0.0103008
ENSG00000178980	SELENOW	selenoprotein W	1251	1813	0.68968	-0.536	0.00913325	0.0486624
ENSG00000165475	CRYL1	crystallin lambda 1	601	871	0.68968	-0.536	0.00122863	0.0108223
ENSG00000139835	GRTP1	growth hormone regulated TBC protein 1	152	221	0.689203	-0.537	0.00488415	0.0306851
ENSG00000174151	CYB561D1	cytochrome b561 family member D1	281	407	0.688725	-0.538	0.003916	0.0260428
ENSG00000136305	CIDEB	cell death-inducing DFFA-like effector b	112	163	0.687294	-0.541	0.00946185	0.04989
ENSG00000116353	MECR	mitochondrial trans-2-enoyl-CoA reductase	76	110	0.687294	-0.541	0.00418828	0.0272981
ENSG00000167182	SP2	Sp2 transcription factor	137	199	0.687294	-0.541	0.0027157	0.0199952
ENSG00000074800	ENO1	enolase 1	4287	6235	0.687294	-0.541	1.99e-05	0.000382291
ENSG00000159377	PSMB4	proteasome subunit beta 4	939	1367	0.686818	-0.542	0.00120667	0.0106882
ENSG00000143393	PI4KB	phosphatidylinositol 4-kinase beta	446	649	0.686342	-0.543	2.24e-05	0.00042361
ENSG00000077044	DGKD	diacylglycerol kinase delta	404	589	0.685867	-0.544	0.00139236	0.0119396
ENSG00000131462	TUBG1	tubulin gamma 1	88	129	0.685391	-0.545	0.00886518	0.0476554
ENSG00000198198	SZT2	SZT2, KICSTOR complex subunit	352	513	0.685391	-0.545	0.00213072	0.0166011
ENSG00000148303	RPL7A	ribosomal protein L7a	13007	19007	0.684442	-0.547	4.57e-05	0.000753316
ENSG00000169189	NSMCE1	NSE1 homolog, SMC5-SMC6 complex component	208	303	0.683968	-0.548	0.00948066	0.0499349
ENSG00000204386	NEU1	neuraminidase 1	376	551	0.683968	-0.548	0.00666182	0.0385759
ENSG00000137486	ARRB1	arrestin beta 1	656	959	0.683968	-0.548	0.000449529	0.00488556
ENSG00000140319	SRP14	signal recognition particle 14	2030	2969	0.683968	-0.548	7.49e-05	0.00112576
ENSG00000168273	SMIM4	small integral membrane protein 4	133	195	0.683494	-0.549	0.0019897	0.0157696
ENSG00000082641	NFE2L1	nuclear factor, erythroid 2 like 1	3009	4406	0.68302	-0.55	0.00140669	0.0120212
ENSG00000221983	UBA52	ubiquitin A-52 residue ribosomal protein fusion product 1	3550	5197	0.68302	-0.55	0.000124487	0.00171302
ENSG00000047579	DTNBP1	dystrobrevin binding protein 1	105	153	0.682547	-0.551	0.00531385	0.0326006
ENSG00000170892	TSEN34	tRNA splicing endonuclease subunit 34	109	159	0.682547	-0.551	0.00235262	0.0178758
ENSG00000162069	BICDL2	BICD family like cargo adaptor 2	408	599	0.682547	-0.551	0.000702874	0.0070031
ENSG00000124155	PIGT	phosphatidylinositol glycan anchor biosynthesis class T	593	869	0.682547	-0.551	0.000173059	0.00224194
ENSG00000119777	TMEM214	transmembrane protein 214	563	825	0.682547	-0.551	0.000112789	0.00158319
ENSG00000158805	ZNF276	zinc finger protein 276	174	256	0.682074	-0.552	0.00847141	0.0461593
ENSG00000100243	CYB5R3	cytochrome b5 reductase 3	322	472	0.682074	-0.552	0.00201941	0.0159472
ENSG00000139180	NDUFA9	NADH:ubiquinone oxidoreductase subunit A9	238	349	0.682074	-0.552	0.000408564	0.00452762
ENSG00000072518	MARK2	microtubule affinity regulating kinase 2	543	797	0.682074	-0.552	9.4e-05	0.00136519
ENSG00000168763	CNNM3	cyclin and CBS domain divalent metal cation transport mediator 3	115	169	0.681601	-0.553	0.00568014	0.0342299
ENSG00000183258	DDX41	DEAD-box helicase 41	256	377	0.681601	-0.553	0.00199954	0.0158118
ENSG00000185624	P4HB	prolyl 4-hydroxylase subunit beta	2801	4109	0.681601	-0.553	0.000204389	0.00255683
ENSG00000101337	TM9SF4	transmembrane 9 superfamily member 4	745	1093	0.681601	-0.553	0.000145561	0.00194101
ENSG00000077312	SNRPA	small nuclear ribonucleoprotein polypeptide A	302	444	0.681129	-0.554	0.00128981	0.0112434
ENSG00000197063	MAFG	MAF bZIP transcription factor G	150	220	0.679714	-0.557	0.00165941	0.013744
ENSG00000254986	DPP3	dipeptidyl peptidase 3	304	448	0.679714	-0.557	0.0012558	0.0110172
ENSG00000011143	MKS1	Meckel syndrome, type 1	87	127	0.679243	-0.558	0.00819363	0.0451147
ENSG00000183762	KREMEN1	kringle containing transmembrane protein 1	408	601	0.679243	-0.558	0.000834382	0.00807848
ENSG00000139567	ACVRL1	activin A receptor like type 1	898	1323	0.678772	-0.559	0.00686832	0.039588
ENSG00000197694	SPTAN1	spectrin alpha, non-erythrocytic 1	1546	2279	0.678302	-0.56	0.00124186	0.0109168
ENSG00000132254	ARFIP2	ADP ribosylation factor interacting protein 2	396	583	0.677832	-0.561	0.000623946	0.00640857
ENSG00000087111	PIGS	phosphatidylinositol glycan anchor biosynthesis class S	550	811	0.677832	-0.561	0.000464205	0.00500768
ENSG00000167642	SPINT2	serine peptidase inhibitor, Kunitz type 2	2102	3104	0.677362	-0.562	0.0010094	0.00938813
ENSG00000187764	SEMA4D	semaphorin 4D	173	256	0.676893	-0.563	0.00754601	0.042441
ENSG00000123136	DDX39A	DExD-box helicase 39A	238	351	0.676893	-0.563	0.00601561	0.035772
ENSG00000184209	SNRNP35	small nuclear ribonucleoprotein U11/U12 subunit 35	265	391	0.676893	-0.563	0.0043884	0.0281851
ENSG00000249673	NOP14-AS1	NOP14 antisense RNA 1	41	61	0.676424	-0.564	0.00933711	0.0494171
ENSG00000090372	STRN4	striatin 4	128	189	0.675955	-0.565	0.00598231	0.0356207
ENSG00000142634	EFHD2	EF-hand domain family member D2	397	588	0.675487	-0.566	0.00314319	0.022257
ENSG00000186575	NF2	neurofibromin 2	206	306	0.675487	-0.566	0.000173338	0.00224389
ENSG00000082781	ITGB5	integrin subunit beta 5	309	458	0.675487	-0.566	0.000112581	0.00158319
ENSG00000140848	CPNE2	copine 2	283	420	0.675487	-0.566	2.69e-05	0.000491634
ENSG00000161091	MFSD12	major facilitator superfamily domain containing 12	78	116	0.675019	-0.567	0.00803847	0.0445404
ENSG00000130309	COLGALT1	collagen beta(1-O)galactosyltransferase 1	482	713	0.675019	-0.567	0.00296656	0.0213348
ENSG00000070610	GBA2	glucosylceramidase beta 2	1079	1598	0.675019	-0.567	8.37e-05	0.00123735
ENSG00000105058	FAM32A	family with sequence similarity 32 member A	697	1032	0.675019	-0.567	2.57e-05	0.000475381
ENSG00000157954	WIPI2	WD repeat domain, phosphoinositide interacting 2	266	397	0.674551	-0.568	0.000227905	0.00281873
ENSG00000166888	STAT6	signal transducer and activator of transcription 6	2038	3022	0.674551	-0.568	0.000183152	0.00233973
ENSG00000008838	MED24	mediator complex subunit 24	273	404	0.674084	-0.569	0.000217026	0.00269562
ENSG00000189114	BLOC1S3	biogenesis of lysosomal organelles complex 1 subunit 3	87	129	0.673617	-0.57	0.00818711	0.0451147
ENSG00000160691	SHC1	SHC adaptor protein 1	548	813	0.673617	-0.57	2.96e-05	0.000529464
ENSG00000099341	PSMD8	proteasome 26S subunit, non-ATPase 8	608	903	0.67315	-0.571	0.00100403	0.00934906
ENSG00000105771	SMG9	SMG9, nonsense mediated mRNA decay factor	126	187	0.671752	-0.574	0.00326329	0.0228214
ENSG00000167106	FAM102A	family with sequence similarity 102 member A	349	520	0.671752	-0.574	0.000163279	0.00213743
ENSG00000143303	RRNAD1	ribosomal RNA adenine dimethylase domain containing 1	132	197	0.671286	-0.575	0.00238713	0.0180439
ENSG00000141905	NFIC	nuclear factor I C	150	223	0.670356	-0.577	0.00289698	0.0209638
ENSG00000158850	B4GALT3	beta-1,4-galactosyltransferase 3	177	264	0.669892	-0.578	0.00264624	0.0195873
ENSG00000132694	ARHGEF11	Rho guanine nucleotide exchange factor 11	491	735	0.669428	-0.579	0.000924541	0.00882429
ENSG00000168924	LETM1	leucine zipper and EF-hand containing transmembrane protein 1	770	1149	0.669428	-0.579	0.000789804	0.0077239
ENSG00000214078	CPNE1	copine 1	316	472	0.668964	-0.58	0.0053352	0.0327036
ENSG00000149932	TMEM219	transmembrane protein 219	511	765	0.6685	-0.581	0.00183562	0.0148378
ENSG00000169230	PRELID1	PRELI domain containing 1	1048	1568	0.668037	-0.582	0.00150797	0.0127557
ENSG00000173171	MTX1	metaxin 1	134	201	0.668037	-0.582	0.000603524	0.00623038
ENSG00000101216	GMEB2	glucocorticoid modulatory element binding protein 2	50	75	0.667574	-0.583	0.00855203	0.0464435
ENSG00000116857	TMEM9	transmembrane protein 9	143	214	0.667574	-0.583	0.00376339	0.0253055
ENSG00000133477	FAM83F	family with sequence similarity 83 member F	440	659	0.667574	-0.583	0.000715335	0.00709489
ENSG00000040633	PHF23	PHD finger protein 23	328	490	0.667112	-0.584	0.00524945	0.0323367
ENSG00000163866	SMIM12	small integral membrane protein 12	331	495	0.667112	-0.584	0.00223865	0.0172423
ENSG00000126012	KDM5C	lysine demethylase 5C	467	701	0.667112	-0.584	2.8e-05	0.000507738
ENSG00000165282	PIGO	phosphatidylinositol glycan anchor biosynthesis class O	285	429	0.666649	-0.585	0.000231152	0.00284353
ENSG00000278535	DHRS11	dehydrogenase/reductase 11	1640	2462	0.666187	-0.586	0.00162271	0.0135228
ENSG00000233476	EEF1A1P6	eukaryotic translation elongation factor 1 alpha 1 pseudogene 6	339	509	0.666187	-0.586	0.00105412	0.00969567
ENSG00000197226	TBC1D9B	TBC1 domain family member 9B	327	491	0.666187	-0.586	0.0004156	0.00459104
ENSG00000132376	INPP5K	inositol polyphosphate-5-phosphatase K	175	262	0.665265	-0.588	0.00295892	0.0212924
ENSG00000198911	SREBF2	sterol regulatory element binding transcription factor 2	1370	2059	0.665265	-0.588	1.1e-07	5.59e-06
ENSG00000105220	GPI	glucose-6-phosphate isomerase	1370	2060	0.664804	-0.589	0.000301862	0.00354004
ENSG00000129353	SLC44A2	solute carrier family 44 member 2	1335	2012	0.663883	-0.591	0.000148588	0.0019702
ENSG00000172500	FIBP	FGF1 intracellular binding protein	213	321	0.663423	-0.592	0.00906531	0.0484202
ENSG00000204438	GPANK1	G-patch domain and ankyrin repeats 1	112	168	0.663423	-0.592	0.00762933	0.0427752
ENSG00000114544	SLC41A3	solute carrier family 41 member 3	148	221	0.663423	-0.592	0.00102699	0.00950623
ENSG00000173039	RELA	RELA proto-oncogene, NF-kB subunit	242	363	0.663423	-0.592	0.000688134	0.00690743
ENSG00000135124	P2RX4	purinergic receptor P2X 4	551	831	0.662963	-0.593	0.000267797	0.00320628
ENSG00000101363	MANBAL	mannosidase beta like	325	490	0.662963	-0.593	0.000143531	0.00192358
ENSG00000215021	PHB2	prohibitin 2	1108	1670	0.662963	-0.593	9.02e-05	0.00131784
ENSG00000174233	ADCY6	adenylate cyclase 6	1613	2433	0.662963	-0.593	2.23e-06	6.54e-05
ENSG00000149257	SERPINH1	serpin family H member 1	477	721	0.662504	-0.594	0.00536947	0.0328216
ENSG00000091542	ALKBH5	alkB homolog 5, RNA demethylase	395	596	0.662504	-0.594	0.00125442	0.0110106
ENSG00000204592	HLA-E	major histocompatibility complex, class I, E	4660	7033	0.662504	-0.594	0.00117432	0.0104813
ENSG00000141562	NARF	nuclear prelamin A recognition factor	222	335	0.662504	-0.594	0.0011201	0.0101209
ENSG00000106400	ZNHIT1	zinc finger HIT-type containing 1	240	364	0.662044	-0.595	0.00110346	0.0100073
ENSG00000161204	ABCF3	ATP binding cassette subfamily F member 3	312	472	0.662044	-0.595	1.73e-05	0.000341863
ENSG00000124659	TBCC	tubulin folding cofactor C	141	212	0.661586	-0.596	0.00705498	0.0404371
ENSG00000162063	CCNF	cyclin F	78	118	0.661586	-0.596	0.0069199	0.0398065
ENSG00000147439	BIN3	bridging integrator 3	177	267	0.661586	-0.596	0.000174976	0.00225841
ENSG00000030110	BAK1	BCL2 antagonist/killer 1	1136	1718	0.661127	-0.597	0.00897305	0.0480285
ENSG00000161010	MRNIP	MRN complex interacting protein	157	237	0.661127	-0.597	0.00538758	0.0328518
ENSG00000161921	CXCL16	C-X-C motif chemokine ligand 16	246	373	0.661127	-0.597	0.00194885	0.0155304
ENSG00000256269	HMBS	hydroxymethylbilane synthase	117	176	0.661127	-0.597	0.00113961	0.0102765
ENSG00000221955	SLC12A8	solute carrier family 12 member 8	107	161	0.660669	-0.598	0.00911557	0.0486132
ENSG00000117408	IPO13	importin 13	134	203	0.660211	-0.599	0.00428105	0.0276825
ENSG00000103496	STX4	syntaxin 4	286	434	0.660211	-0.599	0.00285693	0.02076
ENSG00000111319	SCNN1A	sodium channel epithelial 1 alpha subunit	2244	3401	0.659754	-0.6	0.000267863	0.00320628
ENSG00000135506	OS9	OS9, endoplasmic reticulum lectin	2537	3846	0.659754	-0.6	5.68e-05	0.000899474
ENSG00000163156	SCNM1	sodium channel modifier 1	166	252	0.659297	-0.601	0.00483288	0.0304688
ENSG00000143578	CREB3L4	cAMP responsive element binding protein 3 like 4	149	226	0.659297	-0.601	0.00164262	0.0136243
ENSG00000124733	MEA1	male-enhanced antigen 1	276	419	0.659297	-0.601	0.000785383	0.00768927
ENSG00000180921	FAM83H	family with sequence similarity 83 member H	171	259	0.65884	-0.602	0.00231362	0.0176486
ENSG00000219665	AC008770.1		54	81	0.658383	-0.603	0.00730077	0.0414382
ENSG00000165861	ZFYVE1	zinc finger FYVE-type containing 1	130	199	0.658383	-0.603	0.00300798	0.0215441
ENSG00000124357	NAGK	N-acetylglucosamine kinase	547	832	0.658383	-0.603	0.000285615	0.0033703
ENSG00000147403	RPL10	ribosomal protein L10	14038	21319	0.658383	-0.603	8.39e-06	0.000187937
ENSG00000126561	STAT5A	signal transducer and activator of transcription 5A	200	305	0.657927	-0.604	0.00427354	0.0276609
ENSG00000143365	RORC	RAR related orphan receptor C	193	294	0.657927	-0.604	0.00357003	0.0243376
ENSG00000115073	ACTR1B	ARP1 actin related protein 1 homolog B	316	481	0.657927	-0.604	6.26e-05	0.000968033
ENSG00000108352	RAPGEFL1	Rap guanine nucleotide exchange factor like 1	1197	1819	0.657927	-0.604	4.38e-06	0.000112008
ENSG00000087157	PGS1	phosphatidylglycerophosphate synthase 1	80	122	0.657471	-0.605	0.00714998	0.040861
ENSG00000067225	PKM	pyruvate kinase, muscle	3071	4672	0.657471	-0.605	0.000136108	0.00183995
ENSG00000168591	TMUB2	transmembrane and ubiquitin like domain containing 2	222	339	0.657016	-0.606	0.00140036	0.0119769
ENSG00000132507	EIF5A	eukaryotic translation initiation factor 5A	2304	3508	0.656561	-0.607	0.00115411	0.0103592
ENSG00000105373	NOP53	NOP53 ribosome biogenesis factor	304	464	0.656106	-0.608	0.00517013	0.0320174
ENSG00000008517	IL32	interleukin 32	1710	2608	0.655651	-0.609	0.0053718	0.0328243
ENSG00000143819	EPHX1	epoxide hydrolase 1	378	578	0.655651	-0.609	0.00422902	0.027493
ENSG00000026297	RNASET2	ribonuclease T2	312	477	0.655197	-0.61	0.00537753	0.0328364
ENSG00000104081	BMF	Bcl2 modifying factor	226	344	0.654743	-0.611	0.00236532	0.0179256
ENSG00000105438	KDELR1	KDEL endoplasmic reticulum protein retention receptor 1	1210	1846	0.654743	-0.611	0.000371776	0.00418362
ENSG00000148719	DNAJB12	DnaJ heat shock protein family (Hsp40) member B12	199	305	0.654289	-0.612	0.000184224	0.00234657
ENSG00000136448	NMT1	N-myristoyltransferase 1	420	642	0.654289	-0.612	9.83e-06	0.000216944
ENSG00000117448	AKR1A1	aldo-keto reductase family 1 member A1	1004	1535	0.654289	-0.612	3.66e-07	1.52e-05
ENSG00000196663	TECPR2	tectonin beta-propeller repeat containing 2	78	121	0.653836	-0.613	0.00445974	0.0285593
ENSG00000142512	SIGLEC10	sialic acid binding Ig like lectin 10	94	144	0.653836	-0.613	0.00216808	0.0168397
ENSG00000225828	FAM229A	family with sequence similarity 229 member A	52	79	0.653383	-0.614	0.00918293	0.0488378
ENSG00000100106	TRIOBP	TRIO and F-actin binding protein	160	245	0.653383	-0.614	0.00263557	0.0195716
ENSG00000094914	AAAS	aladin WD repeat nucleoporin	275	420	0.653383	-0.614	0.000249867	0.00302402
ENSG00000105612	DNASE2	deoxyribonuclease 2, lysosomal	312	479	0.65293	-0.615	0.00426078	0.0276192
ENSG00000084764	MAPRE3	microtubule associated protein RP/EB family member 3	200	307	0.652477	-0.616	0.00860899	0.0465792
ENSG00000196878	LAMB3	laminin subunit beta 3	455	698	0.652025	-0.617	0.00651558	0.0379681
ENSG00000161671	EMC10	ER membrane protein complex subunit 10	534	818	0.652025	-0.617	0.00384947	0.0257372
ENSG00000204536	CCHCR1	coiled-coil alpha-helical rod protein 1	197	301	0.652025	-0.617	0.000306175	0.00358098
ENSG00000160058	BSDC1	BSD domain containing 1	710	1089	0.652025	-0.617	2.47e-05	0.000458282
ENSG00000167747	C19orf48	chromosome 19 open reading frame 48	106	162	0.651574	-0.618	0.0038895	0.0259637
ENSG00000173456	RNF26	ring finger protein 26	118	181	0.651574	-0.618	0.00355817	0.0242711
ENSG00000101224	CDC25B	cell division cycle 25B	149	229	0.650671	-0.62	0.00205591	0.016177
ENSG00000156381	ANKRD9	ankyrin repeat domain 9	416	640	0.650671	-0.62	0.00143783	0.0122394
ENSG00000100360	IFT27	intraflagellar transport 27	118	181	0.65022	-0.621	0.00138955	0.0119272
ENSG00000173548	SNX33	sorting nexin 33	270	415	0.65022	-0.621	0.000139746	0.00188006
ENSG00000161011	SQSTM1	sequestosome 1	955	1471	0.64977	-0.622	0.00329656	0.0230166
ENSG00000213923	CSNK1E	casein kinase 1 epsilon	172	266	0.649319	-0.623	0.00896389	0.0480042
ENSG00000178999	AURKB	aurora kinase B	97	149	0.649319	-0.623	0.00816966	0.0450815
ENSG00000144120	TMEM177	transmembrane protein 177	75	116	0.649319	-0.623	0.00619865	0.0365972
ENSG00000160877	NACC1	nucleus accumbens associated 1	238	367	0.649319	-0.623	0.00192662	0.0154094
ENSG00000184162	NR2C2AP	nuclear receptor 2C2 associated protein	92	143	0.648869	-0.624	0.0079009	0.0439313
ENSG00000167925	GHDC	GH3 domain containing	67	103	0.648869	-0.624	0.0049863	0.0311662
ENSG00000125651	GTF2F1	general transcription factor IIF subunit 1	354	544	0.648869	-0.624	0.00200801	0.0158644
ENSG00000170037	CNTROB	centrobin, centriole duplication and spindle assembly protein	211	326	0.648869	-0.624	0.000229201	0.00283075
ENSG00000169020	ATP5I	ATP synthase, H+ transporting, mitochondrial Fo complex subunit E	1198	1846	0.64842	-0.625	0.00678932	0.0392362
ENSG00000222001	AC106876.1		70	109	0.64842	-0.625	0.00671956	0.0388845
ENSG00000175727	MLXIP	MLX interacting protein	1970	3038	0.64842	-0.625	0.00505688	0.0314996
ENSG00000167535	CACNB3	calcium voltage-gated channel auxiliary subunit beta 3	161	249	0.64842	-0.625	0.00176444	0.0143755
ENSG00000114388	NPRL2	NPR2 like, GATOR1 complex subunit	119	184	0.64797	-0.626	0.00247714	0.0186036
ENSG00000183077	AFMID	arylformamidase	231	357	0.647521	-0.627	0.0042511	0.0275667
ENSG00000168476	REEP4	receptor accessory protein 4	118	183	0.647521	-0.627	0.000978275	0.009195
ENSG00000114867	EIF4G1	eukaryotic translation initiation factor 4 gamma 1	1214	1874	0.647521	-0.627	0.000879561	0.00845966
ENSG00000185670	ZBTB3	zinc finger and BTB domain containing 3	148	228	0.647073	-0.628	0.00911567	0.0486132
ENSG00000259674	AC092868.1		120	186	0.647073	-0.628	0.00629103	0.0370232
ENSG00000105486	LIG1	DNA ligase 1	155	240	0.647073	-0.628	0.00121682	0.0107617
ENSG00000143374	TARS2	threonyl-tRNA synthetase 2, mitochondrial (putative)	206	321	0.647073	-0.628	5.19e-05	0.000836024
ENSG00000214022	REPIN1	replication initiator 1	518	799	0.647073	-0.628	2.56e-07	1.13e-05
ENSG00000213930	GALT	galactose-1-phosphate uridylyltransferase	95	148	0.646624	-0.629	0.00921742	0.0489914
ENSG00000103187	COTL1	coactosin like F-actin binding protein 1	522	807	0.646624	-0.629	0.0016709	0.0138261
ENSG00000089060	SLC8B1	solute carrier family 8 member B1	208	322	0.646624	-0.629	0.000533697	0.0056051
ENSG00000063177	RPL18	ribosomal protein L18	3880	5996	0.646624	-0.629	0.000111923	0.00158027
ENSG00000085552	IGSF9	immunoglobulin superfamily member 9	268	414	0.646624	-0.629	0.00761832	0.0427417
ENSG00000151929	BAG3	BCL2 associated athanogene 3	108	167	0.646624	-0.629	0.00434954	0.0279973
ENSG00000227057	WDR46	WD repeat domain 46	228	354	0.646176	-0.63	0.000678356	0.00684111
ENSG00000243646	IL10RB	interleukin 10 receptor subunit beta	502	777	0.645729	-0.631	0.000322525	0.00373897
ENSG00000167074	TEF	TEF, PAR bZIP transcription factor	238	371	0.644834	-0.633	0.00367014	0.024841
ENSG00000188603	CLN3	CLN3, battenin	298	462	0.644834	-0.633	0.00297552	0.0213905
ENSG00000119522	DENND1A	DENN domain containing 1A	172	267	0.644834	-0.633	0.00069192	0.00693746
ENSG00000071553	ATP6AP1	ATPase H+ transporting accessory protein 1	758	1176	0.644834	-0.633	0.000637374	0.00651388
ENSG00000124422	USP22	ubiquitin specific peptidase 22	969	1504	0.644834	-0.633	6.78e-07	2.51e-05
ENSG00000106003	LFNG	LFNG O-fucosylpeptide 3-beta-N-acetylglucosaminyltransferase	251	389	0.644387	-0.634	0.00571832	0.0344123
ENSG00000137700	SLC37A4	solute carrier family 37 member 4	353	549	0.644387	-0.634	3.57e-06	9.7e-05
ENSG00000105339	DENND3	DENN domain containing 3	153	237	0.643941	-0.635	0.00626858	0.0369533
ENSG00000142675	CNKSR1	connector enhancer of kinase suppressor of Ras 1	150	233	0.643941	-0.635	0.00557244	0.0337286
ENSG00000165283	STOML2	stomatin like 2	488	757	0.643941	-0.635	0.0013059	0.0113655
ENSG00000189334	S100A14	S100 calcium binding protein A14	5153	8016	0.643049	-0.637	0.00188243	0.0151337
ENSG00000108591	DRG2	developmentally regulated GTP binding protein 2	132	205	0.643049	-0.637	0.000983227	0.00921579
ENSG00000204160	ZDHHC18	zinc finger DHHC-type containing 18	160	250	0.642603	-0.638	0.00311908	0.0221222
ENSG00000131469	RPL27	ribosomal protein L27	5575	8677	0.642603	-0.638	0.000328228	0.00378122
ENSG00000158773	USF1	upstream transcription factor 1	614	956	0.642603	-0.638	1.42e-05	0.000290545
ENSG00000063245	EPN1	epsin 1	488	760	0.641713	-0.64	0.00272196	0.0200122
ENSG00000182544	MFSD5	major facilitator superfamily domain containing 5	198	309	0.641713	-0.64	0.00221976	0.0171402
ENSG00000184216	IRAK1	interleukin 1 receptor associated kinase 1	247	384	0.641713	-0.64	0.00190644	0.01529
ENSG00000176095	IP6K1	inositol hexakisphosphate kinase 1	236	369	0.641713	-0.64	2.96e-05	0.000529464
ENSG00000092068	SLC7A8	solute carrier family 7 member 8	243	380	0.641713	-0.64	3.25e-06	8.97e-05
ENSG00000105397	TYK2	tyrosine kinase 2	222	347	0.641268	-0.641	0.000669525	0.00677511
ENSG00000172534	HCFC1	host cell factor C1	172	268	0.641268	-0.641	0.000221006	0.00274311
ENSG00000178950	GAK	cyclin G associated kinase	409	638	0.641268	-0.641	4.2e-06	0.000109721
ENSG00000116521	SCAMP3	secretory carrier membrane protein 3	122	190	0.640824	-0.642	0.00483125	0.0304688
ENSG00000140044	JDP2	Jun dimerization protein 2	88	139	0.640824	-0.642	0.00746016	0.0420968
ENSG00000179051	RCC2	regulator of chromosome condensation 2	935	1460	0.640824	-0.642	0.000321357	0.00373158
ENSG00000146828	SLC12A9	solute carrier family 12 member 9	152	238	0.64038	-0.643	0.00634468	0.0371954
ENSG00000119655	NPC2	NPC intracellular cholesterol transporter 2	956	1493	0.639936	-0.644	3.79e-06	0.000101415
ENSG00000105248	CCDC94	coiled-coil domain containing 94	114	178	0.639493	-0.645	0.000193972	0.00244755
ENSG00000105379	ETFB	electron transfer flavoprotein beta subunit	91	142	0.63905	-0.646	0.00398763	0.0263533
ENSG00000180758	GPR157	G protein-coupled receptor 157	184	289	0.638607	-0.647	0.00198391	0.0157399
ENSG00000140464	PML	promyelocytic leukemia	106	165	0.638607	-0.647	0.000590751	0.00612147
ENSG00000131771	PPP1R1B	protein phosphatase 1 regulatory inhibitor subunit 1B	2204	3454	0.638164	-0.648	0.000275214	0.00327007
ENSG00000166143	PPP1R14D	protein phosphatase 1 regulatory inhibitor subunit 14D	1208	1895	0.638164	-0.648	0.00018336	0.00234069
ENSG00000132182	NUP210	nucleoporin 210	149	235	0.63728	-0.65	0.00573019	0.0344719
ENSG00000104221	BRF2	BRF2, RNA polymerase III transcription initiation factor subunit	85	133	0.63728	-0.65	0.000969951	0.00913794
ENSG00000167130	DOLPP1	dolichyldiphosphatase 1	260	406	0.63728	-0.65	0.000177457	0.00228368
ENSG00000137491	SLCO2B1	solute carrier organic anion transporter family member 2B1	553	869	0.63728	-0.65	0.000118315	0.00164623
ENSG00000067057	PFKP	phosphofructokinase, platelet	190	296	0.636839	-0.651	0.000699426	0.00698752
ENSG00000159166	LAD1	ladinin 1	639	1003	0.636397	-0.652	0.00555597	0.0336671
ENSG00000063322	MED29	mediator complex subunit 29	269	423	0.636397	-0.652	2.79e-06	7.92e-05
ENSG00000154079	SDHAF4	succinate dehydrogenase complex assembly factor 4	142	224	0.635957	-0.653	0.00354779	0.0242476
ENSG00000120899	PTK2B	protein tyrosine kinase 2 beta	585	920	0.635957	-0.653	0.00014179	0.00190463
ENSG00000255468	AP001107.9		138	217	0.635516	-0.654	0.00765377	0.0428435
ENSG00000106070	GRB10	growth factor receptor bound protein 10	66	102	0.635516	-0.654	0.00430046	0.0277671
ENSG00000162227	TAF6L	TATA-box binding protein associated factor 6 like	56	87	0.635516	-0.654	0.00410678	0.0269205
ENSG00000105341	DMAC2	distal membrane arm assembly complex 2	133	209	0.635516	-0.654	0.000791613	0.00773726
ENSG00000186815	TPCN1	two pore segment channel 1	398	627	0.634635	-0.656	7.72e-06	0.000174674
ENSG00000137100	DCTN3	dynactin subunit 3	158	250	0.633756	-0.658	0.00180259	0.0146236
ENSG00000160087	UBE2J2	ubiquitin conjugating enzyme E2 J2	154	241	0.633756	-0.658	0.001677	0.0138568
ENSG00000103855	CD276	CD276 molecule	91	144	0.633317	-0.659	0.00327778	0.0228964
ENSG00000164051	CCDC51	coiled-coil domain containing 51	75	118	0.633317	-0.659	0.00235902	0.0179089
ENSG00000179151	EDC3	enhancer of mRNA decapping 3	204	323	0.633317	-0.659	9.18e-05	0.00133592
ENSG00000149131	SERPING1	serpin family G member 1	238	377	0.632878	-0.66	0.00538562	0.0328514
ENSG00000145592	RPL37	ribosomal protein L37	7814	12347	0.632878	-0.66	0.00110581	0.0100234
ENSG00000125970	RALY	RALY heterogeneous nuclear ribonucleoprotein	733	1159	0.632878	-0.66	2.85e-05	0.000515668
ENSG00000100804	PSMB5	proteasome subunit beta 5	440	696	0.63244	-0.661	0.000347924	0.00397406
ENSG00000148300	REXO4	REX4 homolog, 3'-5' exonuclease	113	179	0.63244	-0.661	0.000191024	0.00241559
ENSG00000163344	PMVK	phosphomevalonate kinase	345	546	0.632002	-0.662	0.00211289	0.016499
ENSG00000077235	GTF3C1	general transcription factor IIIC subunit 1	219	348	0.631564	-0.663	2.06e-05	0.000393463
ENSG00000049239	H6PD	hexose-6-phosphate dehydrogenase/glucose 1-dehydrogenase	756	1196	0.631126	-0.664	0.000274765	0.00327007
ENSG00000169217	CD2BP2	CD2 cytoplasmic tail binding protein 2	563	892	0.631126	-0.664	0.000239538	0.00292739
ENSG00000139718	SETD1B	SET domain containing 1B	139	219	0.630689	-0.665	0.00418278	0.0272856
ENSG00000104731	KLHDC4	kelch domain containing 4	111	176	0.630689	-0.665	0.0037319	0.0251712
ENSG00000204946	ZNF783	zinc finger family member 783	90	142	0.630252	-0.666	0.00568017	0.0342299
ENSG00000142330	CAPN10	calpain 10	38	60	0.630252	-0.666	0.0052448	0.0323309
ENSG00000140474	ULK3	unc-51 like kinase 3	270	429	0.630252	-0.666	0.00101723	0.00944582
ENSG00000173786	CNP	2',3'-cyclic nucleotide 3' phosphodiesterase	216	344	0.630252	-0.666	0.000963112	0.00909311
ENSG00000117298	ECE1	endothelin converting enzyme 1	617	980	0.630252	-0.666	3.99e-05	0.000672894
ENSG00000142541	RPL13A	ribosomal protein L13a	6116	9711	0.629815	-0.667	0.0010568	0.0097152
ENSG00000176715	ACSF3	acyl-CoA synthetase family member 3	224	354	0.629815	-0.667	0.000736461	0.0072673
ENSG00000186716	BCR	BCR, RhoGEF and GTPase activating protein	144	228	0.629815	-0.667	0.000660022	0.00670613
ENSG00000131446	MGAT1	mannosyl (alpha-1,3-)-glycoprotein beta-1,2-N-acetylglucosaminyltransferase	507	806	0.629815	-0.667	8.23e-06	0.000184588
ENSG00000137288	UQCC2	ubiquinol-cytochrome c reductase complex assembly factor 2	177	280	0.629379	-0.668	0.00472772	0.0299137
ENSG00000157399	ARSE	arylsulfatase E (chondrodysplasia punctata 1)	243	385	0.629379	-0.668	0.00295258	0.0212605
ENSG00000149679	CABLES2	Cdk5 and Abl enzyme substrate 2	57	90	0.628942	-0.669	0.003821	0.0255944
ENSG00000088356	PDRG1	p53 and DNA damage regulated 1	145	231	0.628507	-0.67	0.000937144	0.00890567
ENSG00000130202	NECTIN2	nectin cell adhesion molecule 2	218	346	0.628071	-0.671	0.000222926	0.00276302
ENSG00000145901	TNIP1	TNFAIP3 interacting protein 1	918	1463	0.627636	-0.672	0.000522975	0.00553085
ENSG00000131797	CLUHP3	clustered mitochondria homolog pseudogene 3	97	156	0.627636	-0.672	0.000365318	0.00413223
ENSG00000126001	CEP250	centrosomal protein 250	192	306	0.627636	-0.672	5.47e-05	0.000874487
ENSG00000162458	FBLIM1	filamin binding LIM protein 1	824	1314	0.627201	-0.673	0.000650389	0.00662366
ENSG00000144655	CSRNP1	cysteine and serine rich nuclear protein 1	76	119	0.626767	-0.674	0.00333177	0.0232253
ENSG00000104946	TBC1D17	TBC1 domain family member 17	192	306	0.626767	-0.674	0.00133881	0.0115884
ENSG00000038358	EDC4	enhancer of mRNA decapping 4	130	208	0.626767	-0.674	0.000655161	0.00666449
ENSG00000116871	MAP7D1	MAP7 domain containing 1	142	226	0.626767	-0.674	0.000242572	0.00295826
ENSG00000163832	ELP6	elongator acetyltransferase complex subunit 6	122	194	0.626767	-0.674	6.16e-05	0.000957633
ENSG00000159176	CSRP1	cysteine and glycine rich protein 1	1201	1918	0.626767	-0.674	4.18e-06	0.000109559
ENSG00000072071	ADGRL1	adhesion G protein-coupled receptor L1	86	137	0.626767	-0.674	0.00169064	0.0139228
ENSG00000100239	PPP6R2	protein phosphatase 6 regulatory subunit 2	189	302	0.626767	-0.674	0.00125904	0.0110401
ENSG00000166311	SMPD1	sphingomyelin phosphodiesterase 1	327	523	0.626332	-0.675	0.00490964	0.0307972
ENSG00000277972	CISD3	CDGSH iron sulfur domain 3	248	396	0.626332	-0.675	0.00106087	0.00972705
ENSG00000126106	TMEM53	transmembrane protein 53	108	173	0.626332	-0.675	0.000482347	0.00518947
ENSG00000197093	GAL3ST4	galactose-3-O-sulfotransferase 4	56	89	0.625898	-0.676	0.00308791	0.0219635
ENSG00000130332	LSM7	LSM7 homolog, U6 small nuclear RNA and mRNA degradation associated	253	405	0.625898	-0.676	0.000673657	0.00680904
ENSG00000104529	EEF1D	eukaryotic translation elongation factor 1 delta	1022	1633	0.625898	-0.676	0.000282922	0.0033453
ENSG00000163956	LRPAP1	LDL receptor related protein associated protein 1	296	473	0.625898	-0.676	5.28e-06	0.000128531
ENSG00000169241	SLC50A1	solute carrier family 50 member 1	844	1351	0.625465	-0.677	0.000392173	0.00438491
ENSG00000168101	NUDT16L1	nudix hydrolase 16 like 1	104	167	0.625031	-0.678	0.00164766	0.0136553
ENSG00000010610	CD4	CD4 molecule	334	534	0.625031	-0.678	0.000743653	0.00732174
ENSG00000166557	TMED3	transmembrane p24 trafficking protein 3	272	434	0.624598	-0.679	0.00028438	0.00336027
ENSG00000106384	MOGAT3	monoacylglycerol O-acyltransferase 3	334	535	0.624165	-0.68	0.00109176	0.00992182
ENSG00000168256	NKIRAS2	NFKB inhibitor interacting Ras like 2	153	245	0.624165	-0.68	0.000411729	0.00455404
ENSG00000132153	DHX30	DExH-box helicase 30	165	266	0.623733	-0.681	0.000123961	0.00170847
ENSG00000169188	APEX2	apurinic/apyrimidinic endodeoxyribonuclease 2	199	319	0.623301	-0.682	5.49e-05	0.000876434
ENSG00000125775	SDCBP2	syndecan binding protein 2	661	1062	0.622437	-0.684	0.00371224	0.0250677
ENSG00000260027	HOXB7	homeobox B7	226	361	0.622437	-0.684	0.00273797	0.0200708
ENSG00000128335	APOL2	apolipoprotein L2	552	886	0.622437	-0.684	9.62e-05	0.00139072
ENSG00000163932	PRKCD	protein kinase C delta	739	1188	0.622437	-0.684	6.01e-06	0.000143989
ENSG00000107263	RAPGEF1	Rap guanine nucleotide exchange factor 1	279	448	0.622006	-0.685	0.000969945	0.00913794
ENSG00000171067	C11orf24	chromosome 11 open reading frame 24	142	229	0.622006	-0.685	0.000259693	0.00312346
ENSG00000136699	SMPD4	sphingomyelin phosphodiesterase 4	130	210	0.621575	-0.686	0.00242421	0.0182767
ENSG00000197958	RPL12	ribosomal protein L12	5017	8073	0.621575	-0.686	0.00159158	0.0132893
ENSG00000157379	DHRS1	dehydrogenase/reductase 1	256	412	0.621575	-0.686	0.00143361	0.0122213
ENSG00000162482	AKR7A3	aldo-keto reductase family 7 member A3	177	286	0.621575	-0.686	0.00128647	0.0112244
ENSG00000115661	STK16	serine/threonine kinase 16	313	504	0.621575	-0.686	0.000634945	0.00650047
ENSG00000149930	TAOK2	TAO kinase 2	302	486	0.621575	-0.686	1.1e-05	0.000236361
ENSG00000106479	ZNF862	zinc finger protein 862	77	124	0.621144	-0.687	0.000718263	0.00711989
ENSG00000189171	S100A13	S100 calcium binding protein A13	109	176	0.620714	-0.688	0.00363184	0.0246677
ENSG00000171858	RPS21	ribosomal protein S21	1086	1749	0.620714	-0.688	0.00342147	0.0236525
ENSG00000177000	MTHFR	methylenetetrahydrofolate reductase	204	328	0.620714	-0.688	0.000258531	0.00311378
ENSG00000141084	RANBP10	RAN binding protein 10	174	281	0.620714	-0.688	0.000221937	0.00275272
ENSG00000099622	CIRBP	cold inducible RNA binding protein	2419	3899	0.620284	-0.689	0.00172108	0.0140945
ENSG00000204463	BAG6	BCL2 associated athanogene 6	903	1456	0.620284	-0.689	8.4e-08	4.54e-06
ENSG00000213918	DNASE1	deoxyribonuclease 1	108	176	0.619854	-0.69	0.00590339	0.0353165
ENSG00000130714	POMT1	protein O-mannosyltransferase 1	110	177	0.619854	-0.69	0.00306692	0.0218587
ENSG00000069998	HDHD5	haloacid dehalogenase like hydrolase domain containing 5	133	214	0.619854	-0.69	0.0011212	0.0101209
ENSG00000129933	MAU2	MAU2 sister chromatid cohesion factor	156	250	0.619424	-0.691	8.57e-05	0.00126067
ENSG00000241839	PLEKHO2	pleckstrin homology domain containing O2	68	110	0.618995	-0.692	0.00476341	0.0300804
ENSG00000105401	CDC37	cell division cycle 37	482	780	0.618995	-0.692	0.00148431	0.0125799
ENSG00000090432	MUL1	mitochondrial E3 ubiquitin protein ligase 1	130	209	0.618566	-0.693	0.00291118	0.0210575
ENSG00000138073	PREB	prolactin regulatory element binding	202	327	0.618566	-0.693	0.000430382	0.00472356
ENSG00000181885	CLDN7	claudin 7	4396	7109	0.618566	-0.693	0.000274917	0.00327007
ENSG00000241973	PI4KA	phosphatidylinositol 4-kinase alpha	346	561	0.618138	-0.694	0.000132515	0.00179801
ENSG00000176153	GPX2	glutathione peroxidase 2	1716	2777	0.617709	-0.695	0.000833523	0.00807464
ENSG00000236104	ZBTB22	zinc finger and BTB domain containing 22	154	251	0.617709	-0.695	0.000664846	0.00674043
ENSG00000167632	TRAPPC9	trafficking protein particle complex 9	98	159	0.617709	-0.695	0.000470093	0.00506495
ENSG00000198758	EPS8L3	EPS8 like 3	1373	2222	0.617709	-0.695	0.000341044	0.00390058
ENSG00000125347	IRF1	interferon regulatory factor 1	681	1103	0.617281	-0.696	0.00589599	0.0352996
ENSG00000048140	TSPAN17	tetraspanin 17	258	420	0.617281	-0.696	0.000452873	0.00491578
ENSG00000161203	AP2M1	adaptor related protein complex 2 mu 1 subunit	1191	1930	0.617281	-0.696	2.9e-06	8.16e-05
ENSG00000136802	LRRC8A	leucine rich repeat containing 8 family member A	92	148	0.616854	-0.697	0.00102685	0.00950623
ENSG00000204257	HLA-DMA	major histocompatibility complex, class II, DM alpha	397	644	0.616426	-0.698	0.00205874	0.0161847
ENSG00000005238	FAM214B	family with sequence similarity 214 member B	153	247	0.616426	-0.698	0.00199224	0.0157826
ENSG00000114395	CYB561D2	cytochrome b561 family member D2	92	149	0.616426	-0.698	0.000699711	0.00698752
ENSG00000159842	ABR	active BCR-related	1032	1674	0.616426	-0.698	6.28e-05	0.000968797
ENSG00000149260	CAPN5	calpain 5	1323	2146	0.616426	-0.698	8.11e-10	1.07e-07
ENSG00000124299	PEPD	peptidase D	84	137	0.615999	-0.699	0.00796166	0.044227
ENSG00000163701	IL17RE	interleukin 17 receptor E	627	1019	0.615999	-0.699	0.00129913	0.0113178
ENSG00000165948	IFI27L1	interferon alpha inducible protein 27 like 1	123	200	0.615999	-0.699	0.000516012	0.00547198
ENSG00000137409	MTCH1	mitochondrial carrier 1	767	1245	0.615999	-0.699	1.91e-06	5.77e-05
ENSG00000139631	CSAD	cysteine sulfinic acid decarboxylase	170	277	0.615572	-0.7	0.00396098	0.0262258
ENSG00000090581	GNPTG	N-acetylglucosamine-1-phosphate transferase gamma subunit	139	226	0.615572	-0.7	0.00185371	0.0149495
ENSG00000114859	CLCN2	chloride voltage-gated channel 2	305	494	0.615572	-0.7	0.0007419	0.00730859
ENSG00000157020	SEC13	SEC13 homolog, nuclear pore and COPII coat complex component	544	883	0.615572	-0.7	1.72e-05	0.000340836
ENSG00000149182	ARFGAP2	ADP ribosylation factor GTPase activating protein 2	505	820	0.615572	-0.7	6.64e-06	0.000155945
ENSG00000161904	LEMD2	LEM domain containing 2	325	529	0.615146	-0.701	0.000133351	0.00180654
ENSG00000174915	PTDSS2	phosphatidylserine synthase 2	49	80	0.614719	-0.702	0.00260275	0.0193638
ENSG00000097007	ABL1	ABL proto-oncogene 1, non-receptor tyrosine kinase	330	539	0.614719	-0.702	0.00032813	0.00378122
ENSG00000110274	CEP164	centrosomal protein 164	74	119	0.613868	-0.704	0.00593599	0.0354173
ENSG00000149476	TKFC	triokinase and FMN cyclase	77	126	0.613868	-0.704	0.000169092	0.00220024
ENSG00000166508	MCM7	minichromosome maintenance complex component 7	700	1139	0.613868	-0.704	6.52e-05	0.00100106
ENSG00000101152	DNAJC5	DnaJ heat shock protein family (Hsp40) member C5	400	652	0.613868	-0.704	4.63e-05	0.000759415
ENSG00000167202	TBC1D2B	TBC1 domain family member 2B	402	656	0.613442	-0.705	1.29e-06	4.29e-05
ENSG00000103502	CDIPT	CDP-diacylglycerol--inositol 3-phosphatidyltransferase	151	246	0.612593	-0.707	0.00198605	0.0157478
ENSG00000075234	TTC38	tetratricopeptide repeat domain 38	493	805	0.612593	-0.707	0.000104405	0.0014919
ENSG00000141551	CSNK1D	casein kinase 1 delta	793	1294	0.612593	-0.707	2.5e-06	7.19e-05
ENSG00000130985	UBA1	ubiquitin like modifier activating enzyme 1	1466	2393	0.612593	-0.707	8.87e-07	3.15e-05
ENSG00000011243	AKAP8L	A-kinase anchoring protein 8 like	217	353	0.612593	-0.707	5.94e-07	2.23e-05
ENSG00000104889	RNASEH2A	ribonuclease H2 subunit A	51	84	0.612168	-0.708	0.00578046	0.0347504
ENSG00000187741	FANCA	Fanconi anemia complementation group A	130	213	0.612168	-0.708	0.00141358	0.0120741
ENSG00000102870	ZNF629	zinc finger protein 629	187	304	0.612168	-0.708	3.49e-05	0.000600499
ENSG00000126351	THRA	thyroid hormone receptor, alpha	300	489	0.612168	-0.708	1.03e-05	0.000223399
ENSG00000052749	RRP12	ribosomal RNA processing 12 homolog	69	113	0.611744	-0.709	0.00302746	0.0216658
ENSG00000088038	CNOT3	CCR4-NOT transcription complex subunit 3	126	206	0.611744	-0.709	5.93e-05	0.000927628
ENSG00000171863	RPS7	ribosomal protein S7	6890	11266	0.611744	-0.709	2.78e-05	0.000505461
ENSG00000162542	TMCO4	transmembrane and coiled-coil domains 4	119	196	0.611744	-0.709	2.59e-05	0.000478034
ENSG00000146826	C7orf43	chromosome 7 open reading frame 43	116	189	0.61132	-0.71	0.00857647	0.0465185
ENSG00000156860	FBRS	fibrosin	259	424	0.61132	-0.71	0.000396616	0.00441481
ENSG00000070814	TCOF1	treacle ribosome biogenesis factor 1	118	194	0.610897	-0.711	0.00274336	0.0201019
ENSG00000101161	PRPF6	pre-mRNA processing factor 6	303	496	0.610897	-0.711	0.000137404	0.00185427
ENSG00000112306	RPS12	ribosomal protein S12	7076	11578	0.610897	-0.711	5.26e-06	0.000128254
ENSG00000183401	CCDC159	coiled-coil domain containing 159	118	194	0.610473	-0.712	0.00337671	0.0234731
ENSG00000143416	SELENBP1	selenium binding protein 1	12409	20329	0.610473	-0.712	0.00175997	0.0143524
ENSG00000054611	TBC1D22A	TBC1 domain family member 22A	118	194	0.610473	-0.712	0.000110453	0.00156731
ENSG00000171552	BCL2L1	BCL2 like 1	396	650	0.610473	-0.712	2.37e-05	0.000443396
ENSG00000198952	SMG5	SMG5, nonsense mediated mRNA decay factor	472	772	0.610473	-0.712	3.95e-06	0.000104614
ENSG00000211584	SLC48A1	solute carrier family 48 member 1	107	174	0.61005	-0.713	0.00364448	0.0247152
ENSG00000155659	VSIG4	V-set and immunoglobulin domain containing 4	154	255	0.61005	-0.713	0.000429579	0.00471862
ENSG00000115042	FAHD2A	fumarylacetoacetate hydrolase domain containing 2A	104	169	0.609628	-0.714	0.000827621	0.00803082
ENSG00000198258	UBL5	ubiquitin like 5	764	1253	0.609628	-0.714	3.13e-05	0.000549913
ENSG00000213676	ATF6B	activating transcription factor 6 beta	764	1254	0.609205	-0.715	0.00687228	0.0395916
ENSG00000099282	TSPAN15	tetraspanin 15	428	705	0.609205	-0.715	4.4e-05	0.000730415
ENSG00000105281	SLC1A5	solute carrier family 1 member 5	442	725	0.609205	-0.715	0.00097312	0.00916285
ENSG00000185453	C19orf68	chromosome 19 open reading frame 68	278	458	0.608783	-0.716	0.00683477	0.0394597
ENSG00000126602	TRAP1	TNF receptor associated protein 1	246	404	0.608783	-0.716	0.00038023	0.00426776
ENSG00000172375	C2CD2L	C2CD2 like	197	323	0.608361	-0.717	0.00747751	0.0421674
ENSG00000145113	MUC4	mucin 4, cell surface associated	1019	1675	0.608361	-0.717	0.00522708	0.0322558
ENSG00000070444	MNT	MAX network transcriptional repressor	103	169	0.608361	-0.717	0.00221686	0.0171272
ENSG00000141965	FEM1A	fem-1 homolog A	168	276	0.60794	-0.718	0.00163427	0.0135743
ENSG00000204580	DDR1	discoidin domain receptor tyrosine kinase 1	1050	1728	0.60794	-0.718	1.85e-06	5.58e-05
ENSG00000171953	ATPAF2	ATP synthase mitochondrial F1 complex assembly factor 2	58	94	0.607518	-0.719	0.00338968	0.0235165
ENSG00000110108	TMEM109	transmembrane protein 109	308	508	0.607097	-0.72	0.000578091	0.00601352
ENSG00000041880	PARP3	poly(ADP-ribose) polymerase family member 3	90	147	0.606256	-0.722	0.00225374	0.0173356
ENSG00000124702	KLHDC3	kelch domain containing 3	366	605	0.606256	-0.722	0.000178558	0.00229278
ENSG00000117676	RPS6KA1	ribosomal protein S6 kinase A1	815	1344	0.606256	-0.722	1.47e-05	0.000298238
ENSG00000163435	ELF3	E74 like ETS transcription factor 3	2419	3989	0.606256	-0.722	1.38e-05	0.000285241
ENSG00000137106	GRHPR	glyoxylate and hydroxypyruvate reductase	226	372	0.605836	-0.723	0.00115917	0.0103877
ENSG00000161692	DBF4B	DBF4 zinc finger B	39	66	0.604997	-0.725	0.00495688	0.0310266
ENSG00000160209	PDXK	pyridoxal kinase	667	1103	0.604997	-0.725	3.8e-06	0.000101415
ENSG00000106012	IQCE	IQ motif containing E	219	361	0.604578	-0.726	0.00265326	0.019631
ENSG00000179409	GEMIN4	gem nuclear organelle associated protein 4	77	127	0.604578	-0.726	0.00204121	0.0160758
ENSG00000110107	PRPF19	pre-mRNA processing factor 19	1241	2053	0.604578	-0.726	0.00016921	0.00220024
ENSG00000012232	EXTL3	exostosin like glycosyltransferase 3	100	165	0.604578	-0.726	0.000115497	0.00161087
ENSG00000132386	SERPINF1	serpin family F member 1	130	216	0.60374	-0.728	0.00379067	0.0254497
ENSG00000100997	ABHD12	abhydrolase domain containing 12	382	634	0.60374	-0.728	5.67e-05	0.000899474
ENSG00000204231	RXRB	retinoid X receptor beta	461	765	0.60374	-0.728	1.3e-06	4.29e-05
ENSG00000160959	LRRC14	leucine rich repeat containing 14	59	98	0.603322	-0.729	0.00821249	0.0451894
ENSG00000100324	TAB1	TGF-beta activated kinase 1 (MAP3K7) binding protein 1	62	102	0.603322	-0.729	0.00355143	0.024251
ENSG00000133216	EPHB2	EPH receptor B2	627	1039	0.603322	-0.729	0.000174257	0.00225245
ENSG00000185033	SEMA4B	semaphorin 4B	218	361	0.603322	-0.729	0.000164621	0.00214856
ENSG00000111669	TPI1	triosephosphate isomerase 1	3736	6189	0.603322	-0.729	3.76e-06	0.00010105
ENSG00000163346	PBXIP1	PBX homeobox interacting protein 1	577	960	0.602904	-0.73	0.0011971	0.010625
ENSG00000100083	GGA1	golgi associated, gamma adaptin ear containing, ARF binding protein 1	220	365	0.602904	-0.73	0.000151714	0.00200556
ENSG00000141013	GAS8	growth arrest specific 8	45	74	0.602069	-0.732	0.00326006	0.0228214
ENSG00000149806	FAU	FAU, ubiquitin like and ribosomal protein S30 fusion	492	817	0.602069	-0.732	0.00197842	0.0157087
ENSG00000131495	NDUFA2	NADH:ubiquinone oxidoreductase subunit A2	223	370	0.602069	-0.732	0.00133219	0.0115368
ENSG00000104973	MED25	mediator complex subunit 25	80	134	0.602069	-0.732	0.000181603	0.00232335
ENSG00000196235	SUPT5H	SPT5 homolog, DSIF elongation factor subunit	603	1002	0.602069	-0.732	3.27e-08	2.17e-06
ENSG00000115649	CNPPD1	cyclin Pas1/PHO80 domain containing 1	751	1249	0.601652	-0.733	2.1e-05	0.000399761
ENSG00000163472	TMEM79	transmembrane protein 79	32	54	0.601235	-0.734	0.0083274	0.0456779
ENSG00000105258	POLR2I	RNA polymerase II subunit I	89	147	0.601235	-0.734	0.000704829	0.00701857
ENSG00000099812	MISP	mitotic spindle positioning	1212	2017	0.600818	-0.735	0.000281764	0.00333386
ENSG00000105372	RPS19	ribosomal protein S19	3042	5062	0.600818	-0.735	7.24e-05	0.00109301
ENSG00000103274	NUBP1	nucleotide binding protein 1	118	195	0.600818	-0.735	2.94e-05	0.000526998
ENSG00000182473	EXOC7	exocyst complex component 7	445	740	0.600402	-0.736	1.88e-05	0.000365036
ENSG00000127124	HIVEP3	human immunodeficiency virus type I enhancer binding protein 3	40	68	0.600402	-0.736	0.00860503	0.0465751
ENSG00000104129	DNAJC17	DnaJ heat shock protein family (Hsp40) member C17	99	165	0.600402	-0.736	0.000278963	0.00330519
ENSG00000104872	PIH1D1	PIH1 domain containing 1	251	419	0.600402	-0.736	0.00014834	0.0019684
ENSG00000108604	SMARCD2	SWI/SNF related, matrix associated, actin dependent regulator of chromatin, subfamily d, member 2	641	1069	0.600402	-0.736	3.82e-05	0.000647605
ENSG00000168393	DTYMK	deoxythymidylate kinase	66	110	0.599986	-0.737	0.00616418	0.0364553
ENSG00000138867	GUCD1	guanylyl cyclase domain containing 1	980	1634	0.599986	-0.737	0.000114591	0.001602
ENSG00000130813	C19orf66	chromosome 19 open reading frame 66	142	237	0.59957	-0.738	0.00198415	0.0157399
ENSG00000079805	DNM2	dynamin 2	1437	2397	0.59957	-0.738	1.29e-07	6.35e-06
ENSG00000198909	MAP3K3	mitogen-activated protein kinase kinase kinase 3	68	114	0.599155	-0.739	0.000389821	0.00436141
ENSG00000136514	RTP4	receptor transporter protein 4	95	158	0.598739	-0.74	0.00490398	0.0307727
ENSG00000131475	VPS25	vacuolar protein sorting 25 homolog	432	721	0.598739	-0.74	0.000367048	0.00414376
ENSG00000158156	XKR8	XK related 8	51	85	0.598324	-0.741	0.002335	0.0177651
ENSG00000204564	C6orf136	chromosome 6 open reading frame 136	313	523	0.598324	-0.741	0.000375561	0.00422077
ENSG00000166595	FAM96B	family with sequence similarity 96 member B	142	236	0.59791	-0.742	0.00317883	0.0224186
ENSG00000134072	CAMK1	calcium/calmodulin dependent protein kinase I	54	89	0.59791	-0.742	0.00589607	0.0352996
ENSG00000127616	SMARCA4	SWI/SNF related, matrix associated, actin dependent regulator of chromatin, subfamily a, member 4	256	428	0.597496	-0.743	0.000266232	0.00319113
ENSG00000124615	MOCS1	molybdenum cofactor synthesis 1	136	227	0.597082	-0.744	0.00596942	0.0355803
ENSG00000087152	ATXN7L3	ataxin 7 like 3	324	545	0.597082	-0.744	1.55e-06	4.87e-05
ENSG00000169403	PTAFR	platelet activating factor receptor	106	178	0.596668	-0.745	0.00217869	0.0169071
ENSG00000148297	MED22	mediator complex subunit 22	82	138	0.596668	-0.745	0.000992947	0.00927954
ENSG00000075240	GRAMD4	GRAM domain containing 4	251	421	0.596668	-0.745	0.000447279	0.00487019
ENSG00000162390	ACOT11	acyl-CoA thioesterase 11	246	412	0.596668	-0.745	1.01e-05	0.000221496
ENSG00000177731	FLII	FLII, actin remodeling protein	466	781	0.596668	-0.745	3.96e-06	0.000104614
ENSG00000135773	CAPN9	calpain 9	267	448	0.596254	-0.746	0.00384968	0.0257372
ENSG00000169926	KLF13	Kruppel like factor 13	1536	2577	0.595841	-0.747	5.03e-06	0.000123876
ENSG00000128563	PRKRIP1	PRKR interacting protein 1 (IL11 inducible)	67	112	0.595428	-0.748	0.00859835	0.0465652
ENSG00000066248	NGEF	neuronal guanine nucleotide exchange factor	165	278	0.595428	-0.748	0.000458123	0.00496044
ENSG00000176340	COX8A	cytochrome c oxidase subunit 8A	377	633	0.595428	-0.748	0.000367014	0.00414376
ENSG00000067606	PRKCZ	protein kinase C zeta	155	260	0.595428	-0.748	3.39e-05	0.00058552
ENSG00000124574	ABCC10	ATP binding cassette subfamily C member 10	92	154	0.595016	-0.749	0.00330944	0.0230973
ENSG00000184164	CRELD2	cysteine rich with EGF like domains 2	94	158	0.595016	-0.749	0.00267972	0.0198016
ENSG00000087245	MMP2	matrix metallopeptidase 2	332	559	0.595016	-0.749	0.00116474	0.0104171
ENSG00000102125	TAZ	tafazzin	97	164	0.595016	-0.749	0.000851611	0.00822706
ENSG00000189046	ALKBH2	alkB homolog 2, alpha-ketoglutarate dependent dioxygenase	50	86	0.594604	-0.75	0.00735018	0.0416105
ENSG00000011422	PLAUR	plasminogen activator, urokinase receptor	183	309	0.594604	-0.75	0.00637682	0.0373113
ENSG00000183317	EPHA10	EPH receptor A10	452	758	0.594604	-0.75	0.000352126	0.00401157
ENSG00000064601	CTSA	cathepsin A	1904	3204	0.594192	-0.751	0.000933844	0.00889366
ENSG00000103042	SLC38A7	solute carrier family 38 member 7	82	139	0.594192	-0.751	0.00066494	0.00674043
ENSG00000049283	EPN3	epsin 3	56	94	0.59378	-0.752	0.00727583	0.0413441
ENSG00000086015	MAST2	microtubule associated serine/threonine kinase 2	652	1100	0.59378	-0.752	6.03e-07	2.26e-05
ENSG00000162522	KIAA1522	KIAA1522	1274	2147	0.593368	-0.753	3.11e-08	2.1e-06
ENSG00000127663	KDM4B	lysine demethylase 4B	109	185	0.592957	-0.754	0.0040306	0.0265707
ENSG00000168306	ACOX2	acyl-CoA oxidase 2	93	156	0.592957	-0.754	0.00372468	0.0251419
ENSG00000033100	CHPF2	chondroitin polymerizing factor 2	118	196	0.592957	-0.754	0.00066088	0.00671095
ENSG00000078061	ARAF	A-Raf proto-oncogene, serine/threonine kinase	248	418	0.592957	-0.754	1.28e-05	0.000266326
ENSG00000101276	SLC52A3	solute carrier family 52 member 3	113	189	0.592546	-0.755	0.00480008	0.0302838
ENSG00000172828	CES3	carboxylesterase 3	744	1255	0.592546	-0.755	0.000147338	0.00195808
ENSG00000158828	PINK1	PTEN induced putative kinase 1	503	851	0.592136	-0.756	0.00424307	0.0275301
ENSG00000105576	TNPO2	transportin 2	356	600	0.592136	-0.756	0.000308624	0.00360529
ENSG00000094631	HDAC6	histone deacetylase 6	268	453	0.592136	-0.756	1.54e-05	0.000310862
ENSG00000198746	GPATCH3	G-patch domain containing 3	72	123	0.591726	-0.757	0.000867519	0.00835764
ENSG00000237441	RGL2	ral guanine nucleotide dissociation stimulator like 2	124	209	0.590906	-0.759	0.00115763	0.0103801
ENSG00000142657	PGD	phosphogluconate dehydrogenase	640	1082	0.590906	-0.759	1.17e-06	3.96e-05
ENSG00000162729	IGSF8	immunoglobulin superfamily member 8	73	124	0.590496	-0.76	0.00519254	0.0320994
ENSG00000146066	HIGD2A	HIG1 hypoxia inducible domain family member 2A	450	761	0.590496	-0.76	1.5e-06	4.76e-05
ENSG00000172818	OVOL1	ovo like transcriptional repressor 1	180	304	0.590496	-0.76	0.00463664	0.0294869
ENSG00000034152	MAP2K3	mitogen-activated protein kinase kinase 3	187	317	0.590496	-0.76	0.00338827	0.0235161
ENSG00000139637	C12orf10	chromosome 12 open reading frame 10	86	144	0.590496	-0.76	0.000935501	0.00889974
ENSG00000177380	PPFIA3	PTPRF interacting protein alpha 3	44	74	0.590087	-0.761	0.00319733	0.0225309
ENSG00000122965	RBM19	RNA binding motif protein 19	124	210	0.590087	-0.761	0.00135951	0.0117385
ENSG00000115307	AUP1	ancient ubiquitous protein 1	796	1350	0.590087	-0.761	1.58e-05	0.00031693
ENSG00000108528	SLC25A11	solute carrier family 25 member 11	234	396	0.58927	-0.763	0.000537204	0.00563854
ENSG00000196683	TOMM7	translocase of outer mitochondrial membrane 7	1596	2708	0.58927	-0.763	4.54e-06	0.000114678
ENSG00000177192	PUS1	pseudouridylate synthase 1	60	103	0.588861	-0.764	0.00114036	0.0102779
ENSG00000157353	FUK	fucokinase	126	212	0.588453	-0.765	0.00188754	0.0151593
ENSG00000205476	CCDC85C	coiled-coil domain containing 85C	186	315	0.588046	-0.766	0.000177633	0.00228426
ENSG00000175334	BANF1	barrier to autointegration factor 1	744	1264	0.588046	-0.766	3.66e-05	0.000624275
ENSG00000102119	EMD	emerin	198	336	0.588046	-0.766	0.000245756	0.00299082
ENSG00000125844	RRBP1	ribosome binding protein 1	1954	3329	0.587231	-0.768	5.24e-06	0.000128108
ENSG00000177556	ATOX1	antioxidant 1 copper chaperone	210	357	0.587231	-0.768	1.6e-06	5.01e-05
ENSG00000126391	FRMD8	FERM domain containing 8	123	209	0.586824	-0.769	0.000202038	0.00253286
ENSG00000105643	ARRDC2	arrestin domain containing 2	164	278	0.586417	-0.77	0.00374704	0.0252441
ENSG00000101246	ARFRP1	ADP ribosylation factor related protein 1	140	240	0.586417	-0.77	4.1e-06	0.000107987
ENSG00000168010	ATG16L2	autophagy related 16 like 2	154	263	0.586011	-0.771	0.00554201	0.0335942
ENSG00000167625	ZNF526	zinc finger protein 526	70	118	0.586011	-0.771	0.00167878	0.0138621
ENSG00000204371	EHMT2	euchromatic histone lysine methyltransferase 2	148	252	0.585605	-0.772	7.66e-05	0.00114793
ENSG00000204264	PSMB8	proteasome subunit beta 8	976	1667	0.585605	-0.772	9.99e-06	0.000219595
ENSG00000170315	UBB	ubiquitin B	8490	14506	0.585605	-0.772	1.44e-06	4.62e-05
ENSG00000060971	ACAA1	acetyl-CoA acyltransferase 1	660	1127	0.585199	-0.773	0.000314125	0.00365977
ENSG00000113716	HMGXB3	HMG-box containing 3	237	406	0.585199	-0.773	4.31e-06	0.000111323
ENSG00000100100	PIK3IP1	phosphoinositide-3-kinase interacting protein 1	167	286	0.584794	-0.774	0.000249751	0.00302402
ENSG00000178307	TMEM11	transmembrane protein 11	140	241	0.583984	-0.776	0.000403045	0.00447497
ENSG00000204482	LST1	leukocyte specific transcript 1	110	190	0.583579	-0.777	0.00222682	0.0171739
ENSG00000188976	NOC2L	NOC2 like nucleolar associated transcriptional repressor	184	317	0.583579	-0.777	1.44e-05	0.000294405
ENSG00000221838	AP4M1	adaptor related protein complex 4 mu 1 subunit	120	205	0.583579	-0.777	0.00056501	0.00589852
ENSG00000226137	BAIAP2-AS1	BAIAP2 antisense RNA 1 (head to head)	140	240	0.582367	-0.78	0.000109978	0.00156385
ENSG00000105700	KXD1	KxDL motif containing 1	290	499	0.582367	-0.78	0.000100276	0.00143877
ENSG00000165238	WNK2	WNK lysine deficient protein kinase 2	222	380	0.581963	-0.781	0.000482542	0.00518947
ENSG00000074416	MGLL	monoglyceride lipase	1675	2880	0.581963	-0.781	1.1e-05	0.000236361
ENSG00000158941	CCAR2	cell cycle and apoptosis regulator 2	455	783	0.581963	-0.781	1.63e-07	7.75e-06
ENSG00000165269	AQP7	aquaporin 7	202	349	0.58156	-0.782	0.00492215	0.0308588
ENSG00000123159	GIPC1	GIPC PDZ domain containing family member 1	717	1234	0.58156	-0.782	1.67e-06	5.17e-05
ENSG00000115461	IGFBP5	insulin like growth factor binding protein 5	391	674	0.581157	-0.783	0.00614911	0.0363784
ENSG00000135924	DNAJB2	DnaJ heat shock protein family (Hsp40) member B2	366	630	0.581157	-0.783	0.000186972	0.00237121
ENSG00000101457	DNTTIP1	deoxynucleotidyltransferase terminal interacting protein 1	130	225	0.581157	-0.783	1.05e-05	0.000228245
ENSG00000269293	ZSCAN16-AS1	ZSCAN16 antisense RNA 1	34	58	0.580352	-0.785	0.00353414	0.0241827
ENSG00000089639	GMIP	GEM interacting protein	113	194	0.580352	-0.785	0.00246473	0.0185263
ENSG00000133466	C1QTNF6	C1q and TNF related 6	60	102	0.580352	-0.785	0.000848078	0.00819746
ENSG00000105289	TJP3	tight junction protein 3	320	551	0.580352	-0.785	0.000195029	0.00245557
ENSG00000104142	VPS18	VPS18, CORVET/HOPS core subunit	86	148	0.57995	-0.786	0.00358464	0.0244041
ENSG00000172757	CFL1	cofilin 1	7618	13129	0.57995	-0.786	1.02e-07	5.29e-06
ENSG00000100034	PPM1F	protein phosphatase, Mg2+/Mn2+ dependent 1F	40	68	0.579548	-0.787	0.00419831	0.0273258
ENSG00000175482	POLD4	DNA polymerase delta 4, accessory subunit	226	390	0.579548	-0.787	0.00376053	0.025296
ENSG00000166484	MAPK7	mitogen-activated protein kinase 7	55	94	0.579548	-0.787	0.00509311	0.031709
ENSG00000172977	KAT5	lysine acetyltransferase 5	296	511	0.579548	-0.787	6.31e-06	0.000149871
ENSG00000214706	IFRD2	interferon related developmental regulator 2	78	134	0.579146	-0.788	0.00740773	0.0418618
ENSG00000185252	ZNF74	zinc finger protein 74	33	57	0.578745	-0.789	0.00360624	0.0245129
ENSG00000130787	HIP1R	huntingtin interacting protein 1 related	111	193	0.578344	-0.79	0.000189362	0.0023965
ENSG00000105393	BABAM1	BRISC and BRCA1 A complex member 1	92	159	0.577943	-0.791	0.00311383	0.0221095
ENSG00000169592	INO80E	INO80 complex subunit E	606	1051	0.577943	-0.791	0.000251347	0.00303982
ENSG00000095059	DHPS	deoxyhypusine synthase	186	321	0.577943	-0.791	0.000161743	0.00212368
ENSG00000085998	POMGNT1	protein O-linked mannose N-acetylglucosaminyltransferase 1 (beta 1,2-)	184	319	0.577943	-0.791	2.16e-05	0.000410347
ENSG00000196998	WDR45	WD repeat domain 45	136	236	0.577543	-0.792	1.01e-05	0.000221496
ENSG00000143761	ARF1	ADP ribosylation factor 1	1905	3300	0.577543	-0.792	2.11e-08	1.53e-06
ENSG00000100294	MCAT	malonyl-CoA-acyl carrier protein transacylase	44	77	0.577543	-0.792	0.0092626	0.0491568
ENSG00000188643	S100A16	S100 calcium binding protein A16	829	1434	0.577543	-0.792	0.00151176	0.0127816
ENSG00000104904	OAZ1	ornithine decarboxylase antizyme 1	1029	1783	0.577543	-0.792	0.000712601	0.00707982
ENSG00000110074	FOXRED1	FAD dependent oxidoreductase domain containing 1	197	342	0.577143	-0.793	3.54e-05	0.000607632
ENSG00000171603	CLSTN1	calsyntenin 1	1332	2311	0.577143	-0.793	2.3e-06	6.72e-05
ENSG00000107521	HPS1	HPS1, biogenesis of lysosomal organelles complex 3 subunit 1	254	443	0.577143	-0.793	2.08e-07	9.41e-06
ENSG00000183597	TANGO2	transport and golgi organization 2 homolog	137	239	0.576743	-0.794	0.000269091	0.00321438
ENSG00000105402	NAPA	NSF attachment protein alpha	258	448	0.576743	-0.794	2.03e-05	0.000388187
ENSG00000129347	KRI1	KRI1 homolog	109	189	0.576343	-0.795	0.000701956	0.00699793
ENSG00000155256	ZFYVE27	zinc finger FYVE-type containing 27	271	472	0.575545	-0.797	5.83e-05	0.000915823
ENSG00000114738	MAPKAPK3	mitogen-activated protein kinase-activated protein kinase 3	146	253	0.575545	-0.797	2.96e-06	8.29e-05
ENSG00000070047	PHRF1	PHD and ring finger domains 1	80	140	0.575545	-0.797	0.00114836	0.0103182
ENSG00000184584	TMEM173	transmembrane protein 173	182	317	0.575545	-0.797	0.000169488	0.00220221
ENSG00000103043	VAC14	Vac14, PIKFYVE complex component	95	165	0.575545	-0.797	5.03e-05	0.000816747
ENSG00000130305	NSUN5	NOP2/Sun RNA methyltransferase family member 5	54	95	0.575146	-0.798	0.00564904	0.0341091
ENSG00000104059	FAM189A1	family with sequence similarity 189 member A1	41	70	0.575146	-0.798	0.00188487	0.0151448
ENSG00000177548	RABEP2	rabaptin, RAB GTPase binding effector protein 2	91	159	0.574747	-0.799	0.00938145	0.0495917
ENSG00000100316	RPL3	ribosomal protein L3	8377	14578	0.574747	-0.799	1.11e-05	0.000237791
ENSG00000167302	TEPSIN	TEPSIN, adaptor related protein complex 4 accessory protein	59	103	0.574349	-0.8	0.00202136	0.0159482
ENSG00000149743	TRPT1	tRNA phosphotransferase 1	75	131	0.574349	-0.8	0.00183141	0.0148106
ENSG00000114737	CISH	cytokine inducible SH2 containing protein	62	109	0.574349	-0.8	0.0017815	0.0144739
ENSG00000104980	TIMM44	translocase of inner mitochondrial membrane 44	104	182	0.574349	-0.8	0.000151337	0.00200209
ENSG00000205250	E2F4	E2F transcription factor 4	252	439	0.574349	-0.8	4.2e-05	0.000705123
ENSG00000142453	CARM1	coactivator associated arginine methyltransferase 1	138	239	0.574349	-0.8	4.12e-06	0.000108359
ENSG00000182704	TSKU	tsukushi, small leucine rich proteoglycan	150	262	0.573951	-0.801	0.00115967	0.0103877
ENSG00000181830	SLC35C1	solute carrier family 35 member C1	214	370	0.573951	-0.801	4.14e-05	0.00069645
ENSG00000010322	NISCH	nischarin	158	277	0.573951	-0.801	2.54e-05	0.000469436
ENSG00000172367	PDZD3	PDZ domain containing 3	607	1059	0.573554	-0.802	0.000322274	0.00373897
ENSG00000185499	MUC1	mucin 1, cell surface associated	1325	2310	0.573554	-0.802	0.00097864	0.009195
ENSG00000167615	LENG8	leukocyte receptor cluster member 8	690	1204	0.573156	-0.803	0.00104645	0.00964037
ENSG00000236935	AP003774.4		74	129	0.572362	-0.805	0.00553412	0.0335697
ENSG00000068903	SIRT2	sirtuin 2	144	251	0.572362	-0.805	7.29e-05	0.00109976
ENSG00000198373	WWP2	WW domain containing E3 ubiquitin protein ligase 2	384	672	0.572362	-0.805	6.73e-09	5.97e-07
ENSG00000204628	RACK1	receptor for activated C kinase 1	4243	7425	0.571569	-0.807	1.79e-05	0.000350394
ENSG00000141738	GRB7	growth factor receptor bound protein 7	119	209	0.570777	-0.809	0.00838388	0.0458581
ENSG00000183034	OTOP2	otopetrin 2	202	353	0.570777	-0.809	0.00289561	0.0209638
ENSG00000128524	ATP6V1F	ATPase H+ transporting V1 subunit F	200	352	0.570777	-0.809	0.000164288	0.00214689
ENSG00000167778	SPRYD3	SPRY domain containing 3	219	384	0.570777	-0.809	6.15e-06	0.000146529
ENSG00000153303	FRMD1	FERM domain containing 1	167	292	0.570382	-0.81	0.00408939	0.0268545
ENSG00000167703	SLC43A2	solute carrier family 43 member 2	90	159	0.569987	-0.811	0.0026455	0.0195873
ENSG00000133597	ADCK2	aarF domain containing kinase 2	87	152	0.569987	-0.811	0.00237572	0.0179732
ENSG00000164713	BRI3	brain protein I3	194	340	0.569987	-0.811	1.63e-05	0.000325045
ENSG00000172531	PPP1CA	protein phosphatase 1 catalytic subunit alpha	713	1253	0.569197	-0.813	2.36e-07	1.05e-05
ENSG00000156983	BRPF1	bromodomain and PHD finger containing 1	66	117	0.568803	-0.814	0.00123558	0.0108726
ENSG00000167705	RILP	Rab interacting lysosomal protein	58	102	0.568803	-0.814	0.000767587	0.00753192
ENSG00000142910	TINAGL1	tubulointerstitial nephritis antigen like 1	302	532	0.568803	-0.814	4.76e-05	0.000778264
ENSG00000160688	FLAD1	flavin adenine dinucleotide synthetase 1	122	214	0.568408	-0.815	0.00027082	0.00323282
ENSG00000096433	ITPR3	inositol 1,4,5-trisphosphate receptor type 3	634	1115	0.568015	-0.816	6.06e-05	0.000946847
ENSG00000103264	FBXO31	F-box protein 31	146	256	0.567621	-0.817	0.00194605	0.0155222
ENSG00000185361	TNFAIP8L1	TNF alpha induced protein 8 like 1	144	255	0.567228	-0.818	0.00114623	0.0103043
ENSG00000181396	OGFOD3	2-oxoglutarate and iron dependent oxygenase domain containing 3	104	184	0.567228	-0.818	0.000409369	0.00453367
ENSG00000235568	NFAM1	NFAT activating protein with ITAM motif 1	47	83	0.566835	-0.819	0.0094757	0.0499238
ENSG00000062282	DGAT2	diacylglycerol O-acyltransferase 2	28	48	0.566835	-0.819	0.00736881	0.041689
ENSG00000173992	CCS	copper chaperone for superoxide dismutase	110	195	0.566835	-0.819	0.00191436	0.0153325
ENSG00000213722	DDAH2	dimethylarginine dimethylaminohydrolase 2	434	767	0.566835	-0.819	0.00108079	0.00986313
ENSG00000169100	SLC25A6	solute carrier family 25 member 6	1146	2022	0.566835	-0.819	2.45e-05	0.000456036
ENSG00000105357	MYH14	myosin heavy chain 14	1326	2340	0.566442	-0.82	5.09e-05	0.000822896
ENSG00000127399	LRRC61	leucine rich repeat containing 61	18	32	0.565265	-0.823	0.00823737	0.0452978
ENSG00000167434	CA4	carbonic anhydrase 4	1436	2543	0.565265	-0.823	0.000892255	0.00856761
ENSG00000207652	MIR621	microRNA 621	35	62	0.564874	-0.824	0.00698099	0.0401051
ENSG00000117385	P3H1	prolyl 3-hydroxylase 1	52	92	0.564874	-0.824	0.00226974	0.0173897
ENSG00000178467	P4HTM	prolyl 4-hydroxylase, transmembrane	83	147	0.564874	-0.824	3.25e-05	0.000565972
ENSG00000012061	ERCC1	ERCC excision repair 1, endonuclease non-catalytic subunit	130	230	0.564482	-0.825	0.000502055	0.00535976
ENSG00000179262	RAD23A	RAD23 homolog A, nucleotide excision repair protein	173	307	0.564482	-0.825	0.000116003	0.00161664
ENSG00000140829	DHX38	DEAH-box helicase 38	326	578	0.564482	-0.825	1.56e-05	0.000313935
ENSG00000077238	IL4R	interleukin 4 receptor	626	1108	0.564482	-0.825	1.34e-08	1.03e-06
ENSG00000241878	PISD	phosphatidylserine decarboxylase	130	231	0.564482	-0.825	8.21e-05	0.00122064
ENSG00000069812	HES2	hes family bHLH transcription factor 2	166	294	0.564482	-0.825	7.77e-07	2.78e-05
ENSG00000148339	SLC25A25	solute carrier family 25 member 25	117	207	0.5637	-0.827	1.74e-06	5.32e-05
ENSG00000113722	CDX1	caudal type homeobox 1	768	1362	0.56331	-0.828	7.33e-05	0.00110467
ENSG00000131143	COX4I1	cytochrome c oxidase subunit 4I1	3806	6755	0.56331	-0.828	4.15e-08	2.57e-06
ENSG00000122224	LY9	lymphocyte antigen 9	44	80	0.562919	-0.829	0.00950057	0.0499598
ENSG00000148356	LRSAM1	leucine rich repeat and sterile alpha motif containing 1	45	80	0.562919	-0.829	0.000580921	0.00603937
ENSG00000070526	ST6GALNAC1	ST6 N-acetylgalactosaminide alpha-2,6-sialyltransferase 1	1886	3350	0.562919	-0.829	2.02e-08	1.48e-06
ENSG00000131116	ZNF428	zinc finger protein 428	52	93	0.562919	-0.829	0.0036091	0.0245228
ENSG00000056558	TRAF1	TNF receptor associated factor 1	70	125	0.562529	-0.83	0.00922158	0.0489986
ENSG00000204394	VARS	valyl-tRNA synthetase	136	243	0.562529	-0.83	0.000821624	0.00799482
ENSG00000182578	CSF1R	colony stimulating factor 1 receptor	205	365	0.562529	-0.83	0.000449269	0.00488556
ENSG00000154370	TRIM11	tripartite motif containing 11	106	189	0.562139	-0.831	0.000183791	0.00234276
ENSG00000108107	RPL28	ribosomal protein L28	2142	3813	0.56175	-0.832	7.52e-06	0.000171352
ENSG00000177951	BET1L	Bet1 golgi vesicular membrane trafficking protein like	260	463	0.56175	-0.832	2.5e-08	1.74e-06
ENSG00000165949	IFI27	interferon alpha inducible protein 27	3634	6473	0.561361	-0.833	0.00530572	0.032591
ENSG00000133612	AGAP3	ArfGAP with GTPase domain, ankyrin repeat and PH domain 3	65	116	0.561361	-0.833	0.00271848	0.0199952
ENSG00000185215	TNFAIP2	TNF alpha induced protein 2	133	238	0.561361	-0.833	0.00530388	0.032591
ENSG00000112759	SLC29A1	solute carrier family 29 member 1 (Augustine blood group)	55	98	0.561361	-0.833	0.00107025	0.00979252
ENSG00000166169	POLL	DNA polymerase lambda	102	181	0.561361	-0.833	7.35e-06	0.000168953
ENSG00000135617	PRADC1	protease associated domain containing 1	87	154	0.560972	-0.834	0.000176122	0.00226984
ENSG00000100029	PES1	pescadillo ribosomal biogenesis factor 1	230	410	0.560972	-0.834	6.97e-06	0.000161285
ENSG00000175662	TOM1L2	target of myb1 like 2 membrane trafficking protein	206	365	0.560972	-0.834	3.95e-06	0.000104614
ENSG00000149150	SLC43A1	solute carrier family 43 member 1	50	89	0.560583	-0.835	0.000434294	0.00475162
ENSG00000172057	ORMDL3	ORMDL sphingolipid biosynthesis regulator 3	1002	1789	0.560583	-0.835	1.81e-05	0.000353254
ENSG00000230487	PSMG3-AS1	PSMG3 antisense RNA 1 (head to head)	34	62	0.560195	-0.836	0.000470682	0.00506817
ENSG00000100577	GSTZ1	glutathione S-transferase zeta 1	160	287	0.560195	-0.836	8.89e-05	0.00130131
ENSG00000103876	FAH	fumarylacetoacetate hydrolase	81	145	0.560195	-0.836	2.97e-05	0.000529464
ENSG00000112033	PPARD	peroxisome proliferator activated receptor delta	233	417	0.559419	-0.838	0.000765869	0.00751928
ENSG00000119688	ABCD4	ATP binding cassette subfamily D member 4	242	431	0.559419	-0.838	1.51e-05	0.000304962
ENSG00000148331	ASB6	ankyrin repeat and SOCS box containing 6	57	102	0.558644	-0.84	0.00218131	0.0169199
ENSG00000137161	CNPY3	canopy FGF signaling regulator 3	150	269	0.558644	-0.84	0.000329178	0.00378896
ENSG00000157227	MMP14	matrix metallopeptidase 14	435	779	0.558644	-0.84	3.59e-05	0.00061603
ENSG00000176454	LPCAT4	lysophosphatidylcholine acyltransferase 4	592	1059	0.558256	-0.841	3.18e-05	0.000558047
ENSG00000167770	OTUB1	OTU deubiquitinase, ubiquitin aldehyde binding 1	213	383	0.558256	-0.841	4.23e-08	2.6e-06
ENSG00000123992	DNPEP	aspartyl aminopeptidase	296	529	0.55787	-0.842	1.26e-05	0.000263629
ENSG00000187051	RPS19BP1	ribosomal protein S19 binding protein 1	75	133	0.55787	-0.842	0.00102581	0.00950623
ENSG00000161981	SNRNP25	small nuclear ribonucleoprotein U11/U12 subunit 25	99	177	0.55787	-0.842	0.000687336	0.00690338
ENSG00000166444	ST5	suppression of tumorigenicity 5	192	345	0.55787	-0.842	3e-05	0.000532876
ENSG00000228474	OST4	oligosaccharyltransferase complex subunit 4, non-catalytic	699	1253	0.55787	-0.842	4.89e-07	1.89e-05
ENSG00000080845	DLGAP4	DLG associated protein 4	104	187	0.557483	-0.843	2.73e-06	7.78e-05
ENSG00000108961	RANGRF	RAN guanine nucleotide release factor	63	113	0.556325	-0.846	0.0045894	0.0292503
ENSG00000172530	BANP	BTG3 associated nuclear protein	49	88	0.556325	-0.846	0.000710017	0.00706218
ENSG00000272333	KMT2B	lysine methyltransferase 2B	115	206	0.556325	-0.846	0.000438477	0.00478328
ENSG00000168894	RNF181	ring finger protein 181	296	531	0.556325	-0.846	7.84e-07	2.8e-05
ENSG00000103168	TAF1C	TATA-box binding protein associated factor, RNA polymerase I subunit C	80	143	0.556325	-0.846	0.00312844	0.0221706
ENSG00000143772	ITPKB	inositol-trisphosphate 3-kinase B	68	121	0.556325	-0.846	0.00234897	0.0178559
ENSG00000185298	CCDC137	coiled-coil domain containing 137	63	112	0.556325	-0.846	0.000483144	0.00519276
ENSG00000103174	NAGPA	N-acetylglucosamine-1-phosphodiester alpha-N-acetylglucosaminidase	65	116	0.556325	-0.846	0.000449145	0.00488556
ENSG00000142156	COL6A1	collagen type VI alpha 1 chain	128	232	0.55594	-0.847	0.00256346	0.0191384
ENSG00000170619	COMMD5	COMM domain containing 5	52	93	0.555554	-0.848	0.00155017	0.0130244
ENSG00000259342	AC025580.1		96	171	0.555554	-0.848	0.000714149	0.00708715
ENSG00000146830	GIGYF1	GRB10 interacting GYF protein 1	182	328	0.555554	-0.848	0.000251541	0.00304006
ENSG00000159884	CCDC107	coiled-coil domain containing 107	126	227	0.555169	-0.849	0.000793777	0.00775408
ENSG00000105443	CYTH2	cytohesin 2	232	419	0.554785	-0.85	6.14e-05	0.000955092
ENSG00000100605	ITPK1	inositol-tetrakisphosphate 1-kinase	283	511	0.554785	-0.85	3.27e-05	0.000569706
ENSG00000244038	DDOST	dolichyl-diphosphooligosaccharide--protein glycosyltransferase non-catalytic subunit	998	1799	0.554785	-0.85	1.27e-06	4.22e-05
ENSG00000112659	CUL9	cullin 9	130	235	0.554785	-0.85	0.000941164	0.00893901
ENSG00000160014	CALM3	calmodulin 3	1552	2799	0.554785	-0.85	6.38e-10	8.84e-08
ENSG00000110497	AMBRA1	autophagy and beclin 1 regulator 1	175	317	0.554016	-0.852	7.75e-06	0.000175141
ENSG00000197122	SRC	SRC proto-oncogene, non-receptor tyrosine kinase	434	782	0.554016	-0.852	1.38e-06	4.49e-05
ENSG00000129354	AP1M2	adaptor related protein complex 1 mu 2 subunit	794	1433	0.554016	-0.852	2.3e-08	1.64e-06
ENSG00000053501	USE1	unconventional SNARE in the ER 1	43	79	0.553632	-0.853	0.00284269	0.0206909
ENSG00000105063	PPP6R1	protein phosphatase 6 regulatory subunit 1	118	214	0.553632	-0.853	8.61e-05	0.00126534
ENSG00000158710	TAGLN2	transgelin 2	2489	4497	0.553632	-0.853	2.89e-05	0.000520063
ENSG00000168918	INPP5D	inositol polyphosphate-5-phosphatase D	154	279	0.553249	-0.854	0.00368534	0.0249149
ENSG00000225697	SLC26A6	solute carrier family 26 member 6	462	836	0.553249	-0.854	0.000153148	0.00201841
ENSG00000213983	AP1G2	adaptor related protein complex 1 gamma 2 subunit	361	652	0.553249	-0.854	1.08e-05	0.000233025
ENSG00000145494	NDUFS6	NADH:ubiquinone oxidoreductase subunit S6	164	296	0.553249	-0.854	0.000680886	0.00685479
ENSG00000068394	GPKOW	G-patch domain and KOW motifs	92	167	0.553249	-0.854	7.62e-05	0.00114396
ENSG00000139645	ANKRD52	ankyrin repeat domain 52	498	902	0.552482	-0.856	1.48e-07	7.2e-06
ENSG00000104825	NFKBIB	NFKB inhibitor beta	262	476	0.552099	-0.857	0.000637028	0.00651388
ENSG00000130768	SMPDL3B	sphingomyelin phosphodiesterase acid like 3B	224	403	0.552099	-0.857	0.00037072	0.00417711
ENSG00000189319	FAM53B	family with sequence similarity 53 member B	204	370	0.551717	-0.858	0.000183696	0.00234276
ENSG00000100307	CBX7	chromobox 7	248	451	0.551717	-0.858	0.00156469	0.0131149
ENSG00000203879	GDI1	GDP dissociation inhibitor 1	350	635	0.551717	-0.858	1.35e-06	4.41e-05
ENSG00000196684	HSH2D	hematopoietic SH2 domain containing	202	366	0.550953	-0.86	0.00303155	0.0216862
ENSG00000197956	S100A6	S100 calcium binding protein A6	7225	13112	0.550953	-0.86	0.000524654	0.00553675
ENSG00000161013	MGAT4B	mannosyl (alpha-1,3-)-glycoprotein beta-1,4-N-acetylglucosaminyltransferase, isozyme B	884	1605	0.550953	-0.86	4.15e-06	0.000108771
ENSG00000149809	TM7SF2	transmembrane 7 superfamily member 2	29	53	0.550571	-0.861	0.00829474	0.0455273
ENSG00000068724	TTC7A	tetratricopeptide repeat domain 7A	184	335	0.550571	-0.861	1.93e-05	0.000371921
ENSG00000197879	MYO1C	myosin IC	853	1548	0.550571	-0.861	1.74e-06	5.32e-05
ENSG00000087087	SRRT	serrate, RNA effector molecule	357	650	0.549808	-0.863	4.56e-06	0.000114784
ENSG00000089486	CDIP1	cell death inducing p53 target 1	50	93	0.549046	-0.865	0.000627443	0.00643875
ENSG00000141504	SAT2	spermidine/spermine N1-acetyltransferase family member 2	178	323	0.549046	-0.865	0.00029365	0.00345811
ENSG00000163703	CRELD1	cysteine rich with EGF like domains 1	122	222	0.549046	-0.865	8.31e-05	0.00123138
ENSG00000134809	TIMM10	translocase of inner mitochondrial membrane 10	174	316	0.548666	-0.866	0.00232089	0.0176869
ENSG00000167671	UBXN6	UBX domain protein 6	90	164	0.548666	-0.866	1.83e-05	0.000357666
ENSG00000146834	MEPCE	methylphosphate capping enzyme	240	439	0.548666	-0.866	1.34e-05	0.000277251
ENSG00000158552	ZFAND2B	zinc finger AN1-type containing 2B	168	307	0.548666	-0.866	0.000145609	0.00194101
ENSG00000168394	TAP1	transporter 1, ATP binding cassette subfamily B member	722	1316	0.548666	-0.866	6.47e-05	0.000994763
ENSG00000182199	SHMT2	serine hydroxymethyltransferase 2	233	424	0.548666	-0.866	2.67e-05	0.000489526
ENSG00000204843	DCTN1	dynactin subunit 1	440	804	0.548666	-0.866	3.33e-08	2.2e-06
ENSG00000160190	SLC37A1	solute carrier family 37 member 1	231	422	0.548286	-0.867	5.47e-06	0.000132532
ENSG00000104957	CCDC130	coiled-coil domain containing 130	70	129	0.547526	-0.869	0.00139232	0.0119396
ENSG00000132698	RAB25	RAB25, member RAS oncogene family	880	1607	0.547526	-0.869	2.68e-11	9.96e-09
ENSG00000178623	GPR35	G protein-coupled receptor 35	112	203	0.547526	-0.869	0.00176273	0.0143683
ENSG00000166140	ZFYVE19	zinc finger FYVE-type containing 19	132	240	0.547526	-0.869	3.87e-05	0.000654548
ENSG00000167792	NDUFV1	NADH:ubiquinone oxidoreductase core subunit V1	498	911	0.547147	-0.87	6.18e-05	0.000958806
ENSG00000073050	XRCC1	X-ray repair cross complementing 1	78	143	0.546768	-0.871	0.000181258	0.00232183
ENSG00000167280	ENGASE	endo-beta-N-acetylglucosaminidase	214	393	0.546768	-0.871	0.000172149	0.0022318
ENSG00000238164	TNFRSF14-AS1	TNFRSF14 antisense RNA 1	128	234	0.546389	-0.872	0.000823929	0.00800833
ENSG00000103549	RNF40	ring finger protein 40	272	497	0.546389	-0.872	7.5e-07	2.72e-05
ENSG00000142002	DPP9	dipeptidyl peptidase 9	158	291	0.54601	-0.873	1.57e-05	0.000316578
ENSG00000171747	LGALS4	galectin 4	18631	34122	0.54601	-0.873	7.41e-06	0.000169755
ENSG00000128340	RAC2	ras-related C3 botulinum toxin substrate 2 (rho family, small GTP binding protein Rac2)	191	351	0.54601	-0.873	0.00418937	0.0272981
ENSG00000168159	RNF187	ring finger protein 187	180	329	0.545632	-0.874	7.14e-05	0.00107816
ENSG00000103335	PIEZO1	piezo type mechanosensitive ion channel component 1	86	158	0.544876	-0.876	5.26e-05	0.000844184
ENSG00000254901	BORCS8	BLOC-1 related complex subunit 8	65	120	0.544499	-0.877	0.00163417	0.0135743
ENSG00000161955	TNFSF13	TNF superfamily member 13	82	152	0.544499	-0.877	0.00121453	0.0107469
ENSG00000188229	TUBB4B	tubulin beta 4B class IVb	1003	1841	0.544499	-0.877	0.000356781	0.00404877
ENSG00000066379	ZNRD1	zinc ribbon domain containing 1	153	280	0.544499	-0.877	0.000195707	0.00246233
ENSG00000126822	PLEKHG3	pleckstrin homology and RhoGEF domain containing G3	198	364	0.544499	-0.877	2.17e-06	6.4e-05
ENSG00000099381	SETD1A	SET domain containing 1A	38	71	0.544121	-0.878	0.000463501	0.00500627
ENSG00000037241	RPL26L1	ribosomal protein L26 like 1	163	300	0.544121	-0.878	5.71e-05	0.000902833
ENSG00000196588	MKL1	megakaryoblastic leukemia (translocation) 1	72	134	0.544121	-0.878	3.92e-05	0.000663206
ENSG00000258301	VASH1-AS1	VASH1 antisense RNA 1	38	70	0.543744	-0.879	0.00386024	0.025788
ENSG00000089351	GRAMD1A	GRAM domain containing 1A	40	73	0.543367	-0.88	0.00473134	0.0299258
ENSG00000165458	INPPL1	inositol polyphosphate phosphatase like 1	264	486	0.543367	-0.88	1.1e-06	3.79e-05
ENSG00000139725	RHOF	ras homolog family member F, filopodia associated	336	620	0.543367	-0.88	0.00559277	0.0338315
ENSG00000101181	MTG2	mitochondrial ribosome associated GTPase 2	56	104	0.542615	-0.882	0.0011437	0.0102974
ENSG00000196498	NCOR2	nuclear receptor corepressor 2	122	226	0.542615	-0.882	0.000130762	0.00177698
ENSG00000177156	TALDO1	transaldolase 1	392	722	0.542615	-0.882	3.54e-06	9.63e-05
ENSG00000184470	TXNRD2	thioredoxin reductase 2	39	72	0.542239	-0.883	0.00277324	0.0202529
ENSG00000173653	RCE1	Ras converting CAAX endopeptidase 1	51	94	0.542239	-0.883	0.000608255	0.0062713
ENSG00000104886	PLEKHJ1	pleckstrin homology domain containing J1	237	438	0.541863	-0.884	1.34e-05	0.000277818
ENSG00000197586	ENTPD6	ectonucleoside triphosphate diphosphohydrolase 6 (putative)	460	849	0.541863	-0.884	2.01e-06	6.03e-05
ENSG00000177352	CCDC71	coiled-coil domain containing 71	59	110	0.541488	-0.885	0.0038273	0.025617
ENSG00000175938	ORAI3	ORAI calcium release-activated calcium modulator 3	44	83	0.541112	-0.886	0.000334905	0.00383791
ENSG00000162144	CYB561A3	cytochrome b561 family member A3	421	779	0.541112	-0.886	2.55e-09	2.75e-07
ENSG00000224870	AL391244.1		112	209	0.540737	-0.887	0.00655349	0.0381254
ENSG00000111667	USP5	ubiquitin specific peptidase 5	396	732	0.540737	-0.887	7.74e-05	0.0011584
ENSG00000095383	TBC1D2	TBC1 domain family member 2	65	122	0.540363	-0.888	0.000561517	0.00586907
ENSG00000171148	TADA3	transcriptional adaptor 3	234	434	0.540363	-0.888	3.95e-05	0.000667232
ENSG00000167748	KLK1	kallikrein 1	504	932	0.539614	-0.89	0.000124328	0.00171218
ENSG00000131037	EPS8L1	EPS8 like 1	86	160	0.53924	-0.891	8.57e-05	0.00126067
ENSG00000227500	SCAMP4	secretory carrier membrane protein 4	120	221	0.53924	-0.891	0.00049372	0.00529171
ENSG00000132205	EMILIN2	elastin microfibril interfacer 2	63	118	0.538867	-0.892	0.0017351	0.014196
ENSG00000254470	AP5B1	adaptor related protein complex 5 beta 1 subunit	49	90	0.538867	-0.892	0.000272154	0.00324653
ENSG00000127445	PIN1	peptidylprolyl cis/trans isomerase, NIMA-interacting 1	61	114	0.538493	-0.893	0.00405691	0.0266937
ENSG00000172428	COPS9	COP9 signalosome subunit 9	86	161	0.538493	-0.893	0.000411155	0.00455057
ENSG00000100403	ZC3H7B	zinc finger CCCH-type containing 7B	404	752	0.538493	-0.893	6.33e-06	0.000149981
ENSG00000143167	GPA33	glycoprotein A33	4506	8371	0.53812	-0.894	1.25e-06	4.17e-05
ENSG00000186193	SAPCD2	suppressor APC domain containing 2	28	51	0.537747	-0.895	0.00467521	0.0296674
ENSG00000110921	MVK	mevalonate kinase	55	102	0.537375	-0.896	0.00117931	0.0105151
ENSG00000153048	CARHSP1	calcium regulated heat stable protein 1	474	884	0.537375	-0.896	4.71e-06	0.000117436
ENSG00000092098	RNF31	ring finger protein 31	53	98	0.537002	-0.897	0.00333087	0.0232253
ENSG00000141002	TCF25	transcription factor 25	283	528	0.53663	-0.898	5.83e-05	0.000915823
ENSG00000100023	PPIL2	peptidylprolyl isomerase like 2	220	410	0.53663	-0.898	3.6e-07	1.5e-05
ENSG00000135441	BLOC1S1	biogenesis of lysosomal organelles complex 1 subunit 1	93	173	0.53663	-0.898	0.00509587	0.03171
ENSG00000185019	UBOX5	U-box domain containing 5	71	132	0.53663	-0.898	0.000244872	0.00298214
ENSG00000212694	LINC01089	long intergenic non-protein coding RNA 1089	69	129	0.536258	-0.899	0.0055382	0.0335828
ENSG00000089157	RPLP0	ribosomal protein lateral stalk subunit P0	10389	19382	0.535887	-0.9	1.21e-07	6.08e-06
ENSG00000204385	SLC44A4	solute carrier family 44 member 4	4217	7869	0.535887	-0.9	2.56e-11	9.92e-09
ENSG00000059122	FLYWCH1	FLYWCH-type zinc finger 1	33	60	0.535515	-0.901	0.00941691	0.0497154
ENSG00000007402	CACNA2D2	calcium voltage-gated channel auxiliary subunit alpha2delta 2	40	75	0.535515	-0.901	0.00582411	0.0349647
ENSG00000178498	DTX3	deltex E3 ubiquitin ligase 3	38	71	0.535515	-0.901	0.00933087	0.0494124
ENSG00000172037	LAMB2	laminin subunit beta 2	56	106	0.535515	-0.901	0.00219024	0.0169666
ENSG00000031823	RANBP3	RAN binding protein 3	145	272	0.535515	-0.901	4.91e-06	0.000121418
ENSG00000163803	PLB1	phospholipase B1	24	45	0.534774	-0.903	0.00380157	0.0254936
ENSG00000125449	ARMC7	armadillo repeat containing 7	83	155	0.534403	-0.904	3.71e-05	0.000630799
ENSG00000170190	SLC16A5	solute carrier family 16 member 5	95	178	0.534033	-0.905	0.000505039	0.00537846
ENSG00000084774	CAD	carbamoyl-phosphate synthetase 2, aspartate transcarbamylase, and dihydroorotase	117	219	0.534033	-0.905	1.35e-05	0.000279263
ENSG00000099991	CABIN1	calcineurin binding protein 1	158	298	0.534033	-0.905	1.22e-05	0.000256907
ENSG00000160993	ALKBH4	alkB homolog 4, lysine demethylase	28	53	0.534033	-0.905	0.00184287	0.0148758
ENSG00000196182	STK40	serine/threonine kinase 40	125	234	0.534033	-0.905	4.41e-05	0.000731347
ENSG00000074842	MYDGF	myeloid derived growth factor	305	572	0.533663	-0.906	0.000203728	0.00255223
ENSG00000177169	ULK1	unc-51 like autophagy activating kinase 1	27	50	0.533293	-0.907	0.00297848	0.021403
ENSG00000182979	MTA1	metastasis associated 1	67	126	0.533293	-0.907	2.02e-05	0.000387632
ENSG00000008323	PLEKHG6	pleckstrin homology and RhoGEF domain containing G6	280	525	0.533293	-0.907	1.45e-06	4.64e-05
ENSG00000100297	MCM5	minichromosome maintenance complex component 5	134	252	0.532923	-0.908	0.00027873	0.00330467
ENSG00000115275	MOGS	mannosyl-oligosaccharide glucosidase	253	474	0.532923	-0.908	6.67e-06	0.000156425
ENSG00000136908	DPM2	dolichyl-phosphate mannosyltransferase subunit 2, regulatory	128	240	0.532923	-0.908	9.15e-06	0.000203414
ENSG00000015532	XYLT2	xylosyltransferase 2	39	73	0.532554	-0.909	0.0025769	0.0192238
ENSG00000114554	PLXNA1	plexin A1	38	72	0.532554	-0.909	0.00169131	0.0139228
ENSG00000119673	ACOT2	acyl-CoA thioesterase 2	95	179	0.532554	-0.909	2.58e-05	0.000475381
ENSG00000196205	EEF1A1P5	eukaryotic translation elongation factor 1 alpha 1 pseudogene 5	969	1818	0.532554	-0.909	1.84e-05	0.000358461
ENSG00000116863	ADPRHL2	ADP-ribosylhydrolase like 2	70	131	0.532554	-0.909	3.26e-06	8.98e-05
ENSG00000145287	PLAC8	placenta specific 8	4570	8588	0.532185	-0.91	1.45e-06	4.64e-05
ENSG00000196365	LONP1	lon peptidase 1, mitochondrial	80	150	0.531816	-0.911	0.000329689	0.00378896
ENSG00000148334	PTGES2	prostaglandin E synthase 2	99	187	0.531816	-0.911	0.000185889	0.00236261
ENSG00000175931	UBE2O	ubiquitin conjugating enzyme E2 O	74	139	0.531816	-0.911	3.1e-05	0.000546601
ENSG00000127948	POR	cytochrome p450 oxidoreductase	207	390	0.53108	-0.913	9.44e-07	3.33e-05
ENSG00000237945	LINC00649	long intergenic non-protein coding RNA 649	105	196	0.530712	-0.914	0.00890426	0.0477921
ENSG00000125967	NECAB3	N-terminal EF-hand calcium binding protein 3	34	64	0.530712	-0.914	0.00187692	0.0151088
ENSG00000135929	CYP27A1	cytochrome P450 family 27 subfamily A member 1	128	242	0.530712	-0.914	0.000598715	0.00619121
ENSG00000108679	LGALS3BP	galectin 3 binding protein	1321	2489	0.530712	-0.914	0.000186894	0.00237121
ENSG00000060491	OGFR	opioid growth factor receptor	44	84	0.529976	-0.916	0.00169406	0.013932
ENSG00000090975	PITPNM2	phosphatidylinositol transfer protein membrane associated 2	26	50	0.529242	-0.918	0.00566365	0.0341775
ENSG00000213654	GPSM3	G protein signaling modulator 3	94	179	0.529242	-0.918	0.00463541	0.0294869
ENSG00000132382	MYBBP1A	MYB binding protein 1a	64	123	0.529242	-0.918	0.00166781	0.013807
ENSG00000072506	HSD17B10	hydroxysteroid 17-beta dehydrogenase 10	214	405	0.529242	-0.918	5.89e-05	0.000922897
ENSG00000203485	INF2	inverted formin, FH2 and WH2 domain containing	186	352	0.529242	-0.918	2.62e-05	0.00048283
ENSG00000125848	FLRT3	fibronectin leucine rich transmembrane protein 3	48	92	0.528875	-0.919	0.00251192	0.0188324
ENSG00000141968	VAV1	vav guanine nucleotide exchange factor 1	64	122	0.528509	-0.92	0.00347029	0.0238955
ENSG00000129465	RIPK3	receptor interacting serine/threonine kinase 3	191	363	0.528509	-0.92	1.34e-06	4.4e-05
ENSG00000105607	GCDH	glutaryl-CoA dehydrogenase	74	140	0.528143	-0.921	0.000537813	0.00564155
ENSG00000172081	MOB3A	MOB kinase activator 3A	221	419	0.528143	-0.921	6.38e-05	0.000983965
ENSG00000220785	MTMR9LP	myotubularin related protein 9-like, pseudogene	28	52	0.528143	-0.921	0.00091676	0.00876439
ENSG00000179832	MROH1	maestro heat like repeat family member 1	88	167	0.528143	-0.921	8.45e-05	0.00124527
ENSG00000178038	ALS2CL	ALS2 C-terminal like	261	495	0.527411	-0.923	1.03e-05	0.000224322
ENSG00000137411	VARS2	valyl-tRNA synthetase 2, mitochondrial	115	216	0.527411	-0.923	6.89e-06	0.000160284
ENSG00000122122	SASH3	SAM and SH3 domain containing 3	146	279	0.527046	-0.924	0.00393231	0.0261041
ENSG00000116260	QSOX1	quiescin sulfhydryl oxidase 1	1112	2109	0.527046	-0.924	1.57e-10	3.51e-08
ENSG00000108963	DPH1	diphthamide biosynthesis 1	54	102	0.526681	-0.925	0.00061522	0.00633191
ENSG00000077782	FGFR1	fibroblast growth factor receptor 1	52	101	0.525951	-0.927	0.0039031	0.0260048
ENSG00000089327	FXYD5	FXYD domain containing ion transport regulator 5	106	203	0.525951	-0.927	0.00139616	0.0119604
ENSG00000119403	PHF19	PHD finger protein 19	78	148	0.525951	-0.927	7.64e-05	0.0011467
ENSG00000162910	MRPL55	mitochondrial ribosomal protein L55	21	39	0.525586	-0.928	0.00889409	0.0477668
ENSG00000140853	NLRC5	NLR family CARD domain containing 5	333	633	0.525586	-0.928	5.91e-05	0.000924852
ENSG00000175707	KDF1	keratinocyte differentiation factor 1	54	102	0.525586	-0.928	1.83e-05	0.000356627
ENSG00000157613	CREB3L1	cAMP responsive element binding protein 3 like 1	310	588	0.525586	-0.928	1.42e-05	0.000290545
ENSG00000159214	CCDC24	coiled-coil domain containing 24	40	78	0.525586	-0.928	0.00210667	0.0164578
ENSG00000147155	EBP	emopamil binding protein (sterol isomerase)	663	1262	0.525586	-0.928	3.95e-07	1.6e-05
ENSG00000157978	LDLRAP1	low density lipoprotein receptor adaptor protein 1	239	455	0.525586	-0.928	2.89e-08	1.97e-06
ENSG00000070413	DGCR2	DiGeorge syndrome critical region gene 2	275	525	0.525222	-0.929	3.21e-05	0.000560578
ENSG00000173153	ESRRA	estrogen related receptor alpha	317	605	0.524858	-0.93	4.96e-05	0.000808636
ENSG00000132394	EEFSEC	eukaryotic elongation factor, selenocysteine-tRNA specific	22	42	0.524495	-0.931	0.00810061	0.0447754
ENSG00000136856	SLC2A8	solute carrier family 2 member 8	26	50	0.524495	-0.931	0.0013072	0.0113655
ENSG00000091640	SPAG7	sperm associated antigen 7	224	427	0.524495	-0.931	0.000427825	0.00470231
ENSG00000010256	UQCRC1	ubiquinol-cytochrome c reductase core protein I	1384	2636	0.524495	-0.931	2.45e-10	4.65e-08
ENSG00000170638	TRABD	TraB domain containing	25	48	0.524495	-0.931	0.00374441	0.0252362
ENSG00000141564	RPTOR	regulatory associated protein of MTOR complex 1	42	81	0.524131	-0.932	0.00042737	0.00470188
ENSG00000137076	TLN1	talin 1	581	1109	0.524131	-0.932	1.94e-06	5.85e-05
ENSG00000162512	SDC3	syndecan 3	108	208	0.523768	-0.933	9.88e-05	0.00141917
ENSG00000005007	UPF1	UPF1, RNA helicase and ATPase	233	446	0.523768	-0.933	1.54e-06	4.85e-05
ENSG00000137497	NUMA1	nuclear mitotic apparatus protein 1	724	1383	0.523768	-0.933	3.98e-08	2.5e-06
ENSG00000138835	RGS3	regulator of G protein signaling 3	150	286	0.523768	-0.933	6.96e-09	6.11e-07
ENSG00000168872	DDX19A	DEAD-box helicase 19A	59	113	0.523405	-0.934	0.00148599	0.0125819
ENSG00000180891	CUEDC1	CUE domain containing 1	36	68	0.523042	-0.935	0.00391242	0.0260371
ENSG00000131899	LLGL1	LLGL1, scribble cell polarity complex component	48	91	0.523042	-0.935	0.0027563	0.0201629
ENSG00000250479	CHCHD10	coiled-coil-helix-coiled-coil-helix domain containing 10	166	317	0.523042	-0.935	0.00266601	0.019717
ENSG00000108511	HOXB6	homeobox B6	122	235	0.523042	-0.935	9.83e-07	3.44e-05
ENSG00000090020	SLC9A1	solute carrier family 9 member A1	378	725	0.522318	-0.937	1.66e-07	7.87e-06
ENSG00000105298	CACTIN	cactin, spliceosome C complex subunit	29	55	0.522318	-0.937	0.00298029	0.0214071
ENSG00000100889	PCK2	phosphoenolpyruvate carboxykinase 2, mitochondrial	390	749	0.521956	-0.938	2.44e-08	1.71e-06
ENSG00000174996	KLC2	kinesin light chain 2	22	44	0.521233	-0.94	0.00872881	0.0470673
ENSG00000141873	SLC39A3	solute carrier family 39 member 3	17	32	0.521233	-0.94	0.00621327	0.0366587
ENSG00000137207	YIPF3	Yip1 domain family member 3	374	717	0.521233	-0.94	4.54e-07	1.79e-05
ENSG00000010327	STAB1	stabilin 1	197	379	0.521233	-0.94	0.00540979	0.0329642
ENSG00000079999	KEAP1	kelch like ECH associated protein 1	176	338	0.521233	-0.94	6.63e-06	0.000155902
ENSG00000196535	MYO18A	myosin XVIIIA	325	623	0.521233	-0.94	2.54e-07	1.12e-05
ENSG00000104885	DOT1L	DOT1 like histone lysine methyltransferase	74	143	0.520511	-0.942	0.000958329	0.00906264
ENSG00000149091	DGKZ	diacylglycerol kinase zeta	86	165	0.52015	-0.943	9.84e-05	0.00141412
ENSG00000173137	ADCK5	aarF domain containing kinase 5	28	54	0.52015	-0.943	0.00731716	0.0414774
ENSG00000130733	YIPF2	Yip1 domain family member 2	116	222	0.52015	-0.943	0.000129943	0.00177094
ENSG00000143373	ZNF687	zinc finger protein 687	89	172	0.51943	-0.945	3.65e-05	0.000623617
ENSG00000139540	SLC39A5	solute carrier family 39 member 5	479	921	0.51943	-0.945	2.44e-05	0.000454897
ENSG00000134686	PHC2	polyhomeotic homolog 2	224	432	0.51943	-0.945	7.74e-07	2.78e-05
ENSG00000115325	DOK1	docking protein 1	70	135	0.51907	-0.946	0.000452577	0.00491562
ENSG00000102226	USP11	ubiquitin specific peptidase 11	94	180	0.51907	-0.946	0.000106438	0.00151722
ENSG00000164081	TEX264	testis expressed 264	190	367	0.51907	-0.946	1.99e-05	0.000382291
ENSG00000127054	INTS11	integrator complex subunit 11	174	335	0.51907	-0.946	8.59e-06	0.000191796
ENSG00000106351	AGFG2	ArfGAP with FG repeats 2	355	683	0.51907	-0.946	1.04e-07	5.39e-06
ENSG00000167543	TP53I13	tumor protein p53 inducible protein 13	42	80	0.518351	-0.948	0.00847857	0.0461593
ENSG00000039650	PNKP	polynucleotide kinase 3'-phosphatase	120	231	0.518351	-0.948	0.000447234	0.00487019
ENSG00000137841	PLCB2	phospholipase C beta 2	76	148	0.517991	-0.949	0.00635182	0.0372248
ENSG00000121104	FAM117A	family with sequence similarity 117 member A	34	66	0.517991	-0.949	0.000302026	0.00354004
ENSG00000105254	TBCB	tubulin folding cofactor B	122	235	0.517991	-0.949	0.00028837	0.0034005
ENSG00000165233	CARD19	caspase recruitment domain family member 19	32	60	0.517632	-0.95	0.0032222	0.0226328
ENSG00000172379	ARNT2	aryl hydrocarbon receptor nuclear translocator 2	36	70	0.517274	-0.951	0.0073063	0.0414526
ENSG00000006704	GTF2IRD1	GTF2I repeat domain containing 1	35	66	0.517274	-0.951	0.000836024	0.00808542
ENSG00000081760	AACS	acetoacetyl-CoA synthetase	215	416	0.517274	-0.951	1.21e-06	4.08e-05
ENSG00000240583	AQP1	aquaporin 1 (Colton blood group)	292	565	0.517274	-0.951	1.16e-10	2.76e-08
ENSG00000183010	PYCR1	pyrroline-5-carboxylate reductase 1	88	168	0.516915	-0.952	0.00108644	0.00988889
ENSG00000132024	CC2D1A	coiled-coil and C2 domain containing 1A	233	450	0.516915	-0.952	5.07e-05	0.000820683
ENSG00000141524	TMC6	transmembrane channel like 6	62	119	0.516915	-0.952	0.00892003	0.0478473
ENSG00000135451	TROAP	trophinin associated protein	54	104	0.516915	-0.952	8.27e-05	0.00122735
ENSG00000188191	PRKAR1B	protein kinase cAMP-dependent type I regulatory subunit beta	32	61	0.516557	-0.953	0.00624247	0.0368186
ENSG00000176092	CRYBG2	crystallin beta-gamma domain containing 2	55	106	0.515842	-0.955	0.00236452	0.0179256
ENSG00000198171	DDRGK1	DDRGK domain containing 1	157	306	0.515842	-0.955	0.000225411	0.00278986
ENSG00000106992	AK1	adenylate kinase 1	43	82	0.515842	-0.955	0.00775957	0.0433209
ENSG00000087077	TRIP6	thyroid hormone receptor interactor 6	39	76	0.515484	-0.956	0.00255276	0.0190813
ENSG00000172732	MUS81	MUS81 structure-specific endonuclease subunit	97	187	0.515484	-0.956	0.000566133	0.00590087
ENSG00000104679	R3HCC1	R3H domain and coiled-coil containing 1	67	131	0.515484	-0.956	2.84e-05	0.000513645
ENSG00000185133	INPP5J	inositol polyphosphate-5-phosphatase J	70	135	0.515127	-0.957	0.00118474	0.0105555
ENSG00000140497	SCAMP2	secretory carrier membrane protein 2	731	1419	0.515127	-0.957	9.09e-08	4.86e-06
ENSG00000047578	KIAA0556	KIAA0556	115	224	0.51477	-0.958	5.67e-05	0.000899474
ENSG00000005882	PDK2	pyruvate dehydrogenase kinase 2	177	344	0.514057	-0.96	5.51e-05	0.00087915
ENSG00000100226	GTPBP1	GTP binding protein 1	297	579	0.513701	-0.961	6.58e-06	0.000154936
ENSG00000103197	TSC2	tuberous sclerosis 2	139	272	0.513701	-0.961	5.17e-06	0.000126709
ENSG00000076984	MAP2K7	mitogen-activated protein kinase kinase 7	94	185	0.513345	-0.962	0.0026391	0.0195722
ENSG00000039987	BEST2	bestrophin 2	147	285	0.513345	-0.962	0.00177257	0.0144215
ENSG00000198715	GLMP	glycosylated lysosomal membrane protein	98	192	0.513345	-0.962	4.51e-06	0.000114088
ENSG00000172046	USP19	ubiquitin specific peptidase 19	199	388	0.513345	-0.962	3.16e-07	1.34e-05
ENSG00000164626	KCNK5	potassium two pore domain channel subfamily K member 5	243	473	0.512989	-0.963	3.23e-06	8.92e-05
ENSG00000159403	C1R	complement C1r	290	567	0.512989	-0.963	0.000732807	0.00724352
ENSG00000204348	DXO	decapping exoribonuclease	39	77	0.512989	-0.963	0.000122021	0.00168706
ENSG00000005844	ITGAL	integrin subunit alpha L	172	336	0.512634	-0.964	0.00846085	0.0461347
ENSG00000213339	QTRT1	queuine tRNA-ribosyltransferase catalytic subunit 1	92	179	0.512634	-0.964	0.00280002	0.0204348
ENSG00000067191	CACNB1	calcium voltage-gated channel auxiliary subunit beta 1	81	160	0.512278	-0.965	0.00365886	0.0247889
ENSG00000064666	CNN2	calponin 2	216	424	0.512278	-0.965	0.000935155	0.00889974
ENSG00000110080	ST3GAL4	ST3 beta-galactoside alpha-2,3-sialyltransferase 4	558	1089	0.512278	-0.965	0.000201739	0.00253275
ENSG00000105519	CAPS	calcyphosine	86	167	0.511923	-0.966	0.000504616	0.00537846
ENSG00000185043	CIB1	calcium and integrin binding 1	744	1452	0.511923	-0.966	4.76e-06	0.00011848
ENSG00000136280	CCM2	CCM2 scaffolding protein	94	185	0.511923	-0.966	0.000138997	0.00187143
ENSG00000068120	COASY	Coenzyme A synthase	289	565	0.511569	-0.967	7.51e-07	2.72e-05
ENSG00000111640	GAPDH	glyceraldehyde-3-phosphate dehydrogenase	10274	20097	0.511214	-0.968	4.73e-13	4.86e-10
ENSG00000012211	PRICKLE3	prickle planar cell polarity protein 3	21	41	0.51086	-0.969	0.00421865	0.0274413
ENSG00000179627	ZBTB42	zinc finger and BTB domain containing 42	35	67	0.51086	-0.969	0.00169731	0.0139456
ENSG00000197019	SERTAD1	SERTA domain containing 1	50	96	0.51086	-0.969	9.58e-05	0.00138595
ENSG00000114767	RRP9	ribosomal RNA processing 9, U3 small nucleolar RNA binding protein	33	65	0.51086	-0.969	0.00226941	0.0173897
ENSG00000167261	DPEP2	dipeptidase 2	24	48	0.510506	-0.97	0.00504678	0.031483
ENSG00000240065	PSMB9	proteasome subunit beta 9	181	356	0.510506	-0.97	0.0009441	0.00895716
ENSG00000114353	GNAI2	G protein subunit alpha i2	234	460	0.510506	-0.97	5.15e-06	0.000126303
ENSG00000130766	SESN2	sestrin 2	133	258	0.510506	-0.97	4.58e-06	0.000114784
ENSG00000064270	ATP2C2	ATPase secretory pathway Ca2+ transporting 2	523	1025	0.510506	-0.97	6.31e-09	5.74e-07
ENSG00000146067	FAM193B	family with sequence similarity 193 member B	104	204	0.510152	-0.971	0.000680929	0.00685479
ENSG00000102225	CDK16	cyclin dependent kinase 16	362	710	0.509799	-0.972	4.32e-08	2.65e-06
ENSG00000101336	HCK	HCK proto-oncogene, Src family tyrosine kinase	84	166	0.509799	-0.972	0.00225571	0.017343
ENSG00000197165	SULT1A2	sulfotransferase family 1A member 2	194	381	0.509799	-0.972	0.000191168	0.00241566
ENSG00000182095	TNRC18	trinucleotide repeat containing 18	146	288	0.509799	-0.972	2.64e-05	0.000484976
ENSG00000124313	IQSEC2	IQ motif and Sec7 domain 2	105	206	0.509446	-0.973	2.59e-06	7.43e-05
ENSG00000150967	ABCB9	ATP binding cassette subfamily B member 9	27	52	0.509093	-0.974	0.00565037	0.0341091
ENSG00000197043	ANXA6	annexin A6	502	987	0.509093	-0.974	0.0014284	0.0121829
ENSG00000150990	DHX37	DEAH-box helicase 37	34	67	0.50874	-0.975	0.00582151	0.0349647
ENSG00000243364	EFNA4	ephrin A4	63	125	0.50874	-0.975	9.67e-05	0.00139597
ENSG00000130311	DDA1	DET1 and DDB1 associated 1	138	273	0.50874	-0.975	2.07e-07	9.39e-06
ENSG00000196465	MYL6B	myosin light chain 6B	48	97	0.50874	-0.975	0.00629199	0.0370232
ENSG00000167515	TRAPPC2L	trafficking protein particle complex 2 like	168	330	0.508387	-0.976	2.78e-05	0.000505329
ENSG00000131408	NR1H2	nuclear receptor subfamily 1 group H member 2	72	143	0.508035	-0.977	0.000201919	0.00253286
ENSG00000130158	DOCK6	dedicator of cytokinesis 6	76	149	0.508035	-0.977	0.000229522	0.0028312
ENSG00000140400	MAN2C1	mannosidase alpha class 2C member 1	256	504	0.508035	-0.977	6.54e-05	0.00100314
ENSG00000167173	C15orf39	chromosome 15 open reading frame 39	46	91	0.507683	-0.978	0.00162775	0.013546
ENSG00000214655	ZSWIM8	zinc finger SWIM-type containing 8	168	330	0.507683	-0.978	4.47e-06	0.000113317
ENSG00000100288	CHKB	choline kinase beta	18	37	0.507331	-0.979	0.00835216	0.045767
ENSG00000141499	WRAP53	WD repeat containing antisense to TP53	29	57	0.507331	-0.979	0.00203811	0.0160586
ENSG00000167600	CYP2S1	cytochrome P450 family 2 subfamily S member 1	130	255	0.507331	-0.979	0.000863653	0.00833522
ENSG00000104969	SGTA	small glutamine rich tetratricopeptide repeat containing alpha	63	124	0.507331	-0.979	6.45e-05	0.000993208
ENSG00000128268	MGAT3	mannosyl (beta-1,4-)-glycoprotein beta-1,4-N-acetylglucosaminyltransferase	39	78	0.50698	-0.98	0.00800494	0.0444109
ENSG00000160214	RRP1	ribosomal RNA processing 1	40	78	0.50698	-0.98	0.00217132	0.0168574
ENSG00000080031	PTPRH	protein tyrosine phosphatase, receptor type H	848	1672	0.50698	-0.98	1.02e-05	0.000222696
ENSG00000197150	ABCB8	ATP binding cassette subfamily B member 8	56	109	0.50698	-0.98	2.8e-06	7.92e-05
ENSG00000185359	HGS	hepatocyte growth factor-regulated tyrosine kinase substrate	136	269	0.50698	-0.98	1.19e-06	4e-05
ENSG00000205517	RGL3	ral guanine nucleotide dissociation stimulator like 3	18	37	0.506628	-0.981	0.00323597	0.0227087
ENSG00000235863	B3GALT4	beta-1,3-galactosyltransferase 4	34	66	0.505927	-0.983	0.00592496	0.035412
ENSG00000171236	LRG1	leucine rich alpha-2-glycoprotein 1	120	236	0.505927	-0.983	0.0012056	0.0106863
ENSG00000105404	RABAC1	Rab acceptor 1	118	234	0.505927	-0.983	6.03e-05	0.000942722
ENSG00000167702	KIFC2	kinesin family member C2	93	182	0.505927	-0.983	0.0035846	0.0244041
ENSG00000174292	TNK1	tyrosine kinase non receptor 1	90	178	0.505927	-0.983	3.1e-06	8.65e-05
ENSG00000007047	MARK4	microtubule affinity regulating kinase 4	32	65	0.505226	-0.985	0.00207805	0.0162706
ENSG00000166482	MFAP4	microfibril associated protein 4	228	452	0.505226	-0.985	6.61e-05	0.00100991
ENSG00000110047	EHD1	EH domain containing 1	201	398	0.505226	-0.985	5.25e-05	0.000843111
ENSG00000146955	RAB19	RAB19, member RAS oncogene family	33	65	0.504876	-0.986	0.00419631	0.0273258
ENSG00000102882	MAPK3	mitogen-activated protein kinase 3	531	1050	0.504876	-0.986	2.95e-07	1.27e-05
ENSG00000160271	RALGDS	ral guanine nucleotide dissociation stimulator	156	311	0.504176	-0.988	2.66e-05	0.000488483
ENSG00000100038	TOP3B	topoisomerase (DNA) III beta	55	109	0.503827	-0.989	9.53e-07	3.35e-05
ENSG00000173237	C11orf86	chromosome 11 open reading frame 86	45	90	0.503478	-0.99	0.00596427	0.0355618
ENSG00000106178	CCL24	C-C motif chemokine ligand 24	102	205	0.503478	-0.99	0.00581524	0.0349474
ENSG00000105723	GSK3A	glycogen synthase kinase 3 alpha	164	325	0.503478	-0.99	2.32e-05	0.00043538
ENSG00000136883	KIF12	kinesin family member 12	47	94	0.503129	-0.991	0.00276272	0.0201845
ENSG00000184640	40057	septin 9	633	1259	0.503129	-0.991	5.34e-06	0.000129752
ENSG00000111077	TNS2	tensin 2	46	90	0.502432	-0.993	0.00197515	0.0156899
ENSG00000196189	SEMA4A	semaphorin 4A	48	96	0.501736	-0.995	0.000675054	0.00681921
ENSG00000109103	UNC119	unc-119 lipid binding chaperone	61	122	0.501388	-0.996	0.000699549	0.00698752
ENSG00000175634	RPS6KB2	ribosomal protein S6 kinase B2	112	224	0.501388	-0.996	1.99e-05	0.000382677
ENSG00000142208	AKT1	AKT serine/threonine kinase 1	240	478	0.501388	-0.996	8.08e-06	0.000181654
ENSG00000100994	PYGB	glycogen phosphorylase B	1320	2633	0.501388	-0.996	4.01e-07	1.62e-05
ENSG00000188373	C10orf99	chromosome 10 open reading frame 99	2016	4021	0.501388	-0.996	1.98e-09	2.3e-07
ENSG00000170458	CD14	CD14 molecule	90	180	0.501041	-0.997	0.000112755	0.00158319
ENSG00000071859	FAM50A	family with sequence similarity 50 member A	246	492	0.501041	-0.997	1.52e-07	7.35e-06
ENSG00000092841	MYL6	myosin light chain 6	9672	19307	0.501041	-0.997	7.74e-09	6.6e-07
ENSG00000269404	SPIB	Spi-B transcription factor	422	844	0.5	-1	2.24e-05	0.00042361
ENSG00000204469	PRRC2A	proline rich coiled-coil 2A	393	787	0.5	-1	1.63e-06	5.09e-05
ENSG00000164054	SHISA5	shisa family member 5	258	516	0.5	-1	4.4e-07	1.74e-05
ENSG00000142949	PTPRF	protein tyrosine phosphatase, receptor type F	1742	3485	0.5	-1	1.78e-07	8.3e-06
ENSG00000133067	LGR6	leucine rich repeat containing G protein-coupled receptor 6	20	39	0.499654	-1.001	0.00451063	0.0288219
ENSG00000011347	SYT7	synaptotagmin 7	76	150	0.499654	-1.001	0.000247494	0.00300154
ENSG00000126005	MMP24-AS1	MMP24 antisense RNA 1	171	341	0.499654	-1.001	1.14e-06	3.9e-05
ENSG00000196187	TMEM63A	transmembrane protein 63A	416	834	0.499654	-1.001	7.42e-08	4.08e-06
ENSG00000169203	NPIPB12	nuclear pore complex interacting protein family, member B12	26	52	0.499654	-1.001	0.00373788	0.0252019
ENSG00000205155	PSENEN	presenilin enhancer gamma-secretase subunit	231	463	0.499654	-1.001	0.00106487	0.00975352
ENSG00000259120	SMIM6	small integral membrane protein 6	79	159	0.499654	-1.001	1.84e-05	0.000358815
ENSG00000125991	ERGIC3	ERGIC and golgi 3	1552	3109	0.499654	-1.001	2.35e-06	6.82e-05
ENSG00000179632	MAF1	MAF1 homolog, negative regulator of RNA polymerase III	238	476	0.499654	-1.001	1.43e-06	4.6e-05
ENSG00000160113	NR2F6	nuclear receptor subfamily 2 group F member 6	115	229	0.499307	-1.002	3.2e-05	0.00056004
ENSG00000075275	CELSR1	cadherin EGF LAG seven-pass G-type receptor 1	18	36	0.498961	-1.003	0.00364085	0.0247001
ENSG00000181513	ACBD4	acyl-CoA binding domain containing 4	52	105	0.49827	-1.005	0.00315335	0.0222929
ENSG00000141934	PLPP2	phospholipid phosphatase 2	188	377	0.49827	-1.005	0.000142735	0.00191437
ENSG00000124839	RAB17	RAB17, member RAS oncogene family	172	344	0.49827	-1.005	1.1e-05	0.000235274
ENSG00000074276	CDHR2	cadherin related family member 2	532	1068	0.497925	-1.006	0.000241717	0.00294989
ENSG00000142669	SH3BGRL3	SH3 domain binding glutamate rich protein like 3	929	1865	0.497925	-1.006	8.3e-05	0.00123013
ENSG00000100139	MICALL1	MICAL like 1	53	105	0.497925	-1.006	6.83e-05	0.00103842
ENSG00000107021	TBC1D13	TBC1 domain family member 13	114	228	0.497925	-1.006	1.33e-08	1.03e-06
ENSG00000166391	MOGAT2	monoacylglycerol O-acyltransferase 2	879	1765	0.497925	-1.006	7.52e-09	6.51e-07
ENSG00000170075	GPR37L1	G protein-coupled receptor 37 like 1	24	48	0.49758	-1.007	0.00705856	0.0404444
ENSG00000254827	SLC22A18AS	solute carrier family 22 member 18 antisense	84	169	0.49758	-1.007	0.000432599	0.00474285
ENSG00000099949	LZTR1	leucine zipper like transcription regulator 1	70	142	0.497235	-1.008	0.000820473	0.00798807
ENSG00000178828	RNF186	ring finger protein 186	76	153	0.496891	-1.009	0.000246896	0.00299844
ENSG00000120306	CYSTM1	cysteine rich transmembrane module containing 1	1328	2673	0.496891	-1.009	1.02e-05	0.00022324
ENSG00000130303	BST2	bone marrow stromal cell antigen 2	121	244	0.496202	-1.011	0.00155708	0.0130762
ENSG00000103507	BCKDK	branched chain ketoacid dehydrogenase kinase	84	169	0.496202	-1.011	1.01e-05	0.000221872
ENSG00000160445	ZER1	zyg-11 related cell cycle regulator	176	355	0.496202	-1.011	4.75e-07	1.85e-05
ENSG00000198925	ATG9A	autophagy related 9A	177	357	0.496202	-1.011	3.59e-07	1.5e-05
ENSG00000140320	BAHD1	bromo adjacent homology domain containing 1	336	676	0.496202	-1.011	4.75e-10	7.21e-08
ENSG00000187091	PLCD1	phospholipase C delta 1	158	318	0.496202	-1.011	0.000866926	0.00835654
ENSG00000005075	POLR2J	RNA polymerase II subunit J	269	544	0.496202	-1.011	7.37e-07	2.69e-05
ENSG00000100055	CYTH4	cytohesin 4	68	137	0.495515	-1.013	0.00229575	0.0175582
ENSG00000166794	PPIB	peptidylprolyl isomerase B	1410	2846	0.495515	-1.013	1.65e-06	5.14e-05
ENSG00000184076	UQCR10	ubiquinol-cytochrome c reductase, complex III subunit X	510	1029	0.495515	-1.013	1.52e-06	4.79e-05
ENSG00000197363	ZNF517	zinc finger protein 517	35	70	0.495171	-1.014	0.000378285	0.00424866
ENSG00000284691	AC073111.5		43	86	0.495171	-1.014	0.000355844	0.00404076
ENSG00000185800	DMWD	DM1 locus, WD repeat containing	44	89	0.495171	-1.014	0.000120887	0.00167668
ENSG00000173638	SLC19A1	solute carrier family 19 member 1	32	64	0.495171	-1.014	0.001026	0.00950623
ENSG00000168884	TNIP2	TNFAIP3 interacting protein 2	109	219	0.495171	-1.014	1.23e-05	0.000258522
ENSG00000105364	MRPL4	mitochondrial ribosomal protein L4	42	86	0.494828	-1.015	0.000179162	0.00229716
ENSG00000114841	DNAH1	dynein axonemal heavy chain 1	65	131	0.494485	-1.016	0.000144865	0.00193553
ENSG00000130734	ATG4D	autophagy related 4D cysteine peptidase	90	183	0.494143	-1.017	0.000185293	0.00235676
ENSG00000187288	CIDEC	cell death inducing DFFA like effector c	24	49	0.4938	-1.018	0.00950255	0.0499598
ENSG00000179922	ZNF784	zinc finger protein 784	30	63	0.4938	-1.018	0.00015007	0.00198684
ENSG00000063244	U2AF2	U2 small nuclear RNA auxiliary factor 2	642	1300	0.4938	-1.018	2.86e-09	2.96e-07
ENSG00000273899	NOL12	nucleolar protein 12	44	89	0.493458	-1.019	0.00653738	0.0380698
ENSG00000116786	PLEKHM2	pleckstrin homology and RUN domain containing M2	72	149	0.493458	-1.019	3.12e-05	0.000549817
ENSG00000064961	HMG20B	high mobility group 20B	60	120	0.493458	-1.019	3.1e-05	0.000546941
ENSG00000100280	AP1B1	adaptor related protein complex 1 beta 1 subunit	264	536	0.493458	-1.019	3.7e-07	1.52e-05
ENSG00000080189	SLC35C2	solute carrier family 35 member C2	177	359	0.493458	-1.019	1.38e-08	1.05e-06
ENSG00000231535	LINC00278	long intergenic non-protein coding RNA 278	13	27	0.492775	-1.021	0.00910452	0.0486131
ENSG00000100359	SGSM3	small G protein signaling modulator 3	16	34	0.492775	-1.021	0.00298391	0.0214206
ENSG00000160917	CPSF4	cleavage and polyadenylation specific factor 4	60	121	0.492092	-1.023	0.000159778	0.00210104
ENSG00000141971	MVB12A	multivesicular body subunit 12A	50	101	0.491751	-1.024	0.000464055	0.00500768
ENSG00000172819	RARG	retinoic acid receptor gamma	40	82	0.491751	-1.024	0.000327772	0.00378122
ENSG00000128342	LIF	LIF, interleukin 6 family cytokine	44	90	0.491751	-1.024	5.82e-05	0.000915823
ENSG00000122140	MRPS2	mitochondrial ribosomal protein S2	68	137	0.491751	-1.024	4.29e-05	0.0007165
ENSG00000141349	G6PC3	glucose-6-phosphatase catalytic subunit 3	78	159	0.491751	-1.024	1.47e-05	0.000298583
ENSG00000077150	NFKB2	nuclear factor kappa B subunit 2	108	220	0.49141	-1.025	0.000126157	0.00173304
ENSG00000101940	WDR13	WD repeat domain 13	154	313	0.49141	-1.025	1.84e-06	5.58e-05
ENSG00000100412	ACO2	aconitase 2	846	1723	0.49107	-1.026	2.31e-09	2.52e-07
ENSG00000272655	POLR2J4	RNA polymerase II subunit J4, pseudogene	37	76	0.49107	-1.026	0.00188262	0.0151337
ENSG00000125755	SYMPK	symplekin	214	435	0.49107	-1.026	3.41e-08	2.24e-06
ENSG00000184232	OAF	out at first homolog	372	758	0.49107	-1.026	1.07e-08	8.54e-07
ENSG00000074964	ARHGEF10L	Rho guanine nucleotide exchange factor 10 like	173	352	0.49073	-1.027	7.43e-07	2.7e-05
ENSG00000223573	TINCR	tissue differentiation-inducing non-protein coding RNA	36	74	0.49039	-1.028	0.00291941	0.0210825
ENSG00000105329	TGFB1	transforming growth factor beta 1	35	73	0.49039	-1.028	0.00154498	0.0129996
ENSG00000204227	RING1	ring finger protein 1	254	517	0.49039	-1.028	5.75e-05	0.000908195
ENSG00000236423	LINC01134	long intergenic non-protein coding RNA 1134	26	54	0.49005	-1.029	0.00510662	0.0317309
ENSG00000178605	GTPBP6	GTP binding protein 6 (putative)	54	111	0.49005	-1.029	0.00026122	0.00313967
ENSG00000170296	GABARAP	GABA type A receptor-associated protein	176	362	0.49005	-1.029	1.67e-07	7.91e-06
ENSG00000125835	SNRPB	small nuclear ribonucleoprotein polypeptides B and B1	118	240	0.49005	-1.029	9.21e-08	4.88e-06
ENSG00000204991	SPIRE2	spire type actin nucleation factor 2	278	570	0.489371	-1.031	1.32e-05	0.000273587
ENSG00000130204	TOMM40	translocase of outer mitochondrial membrane 40	128	261	0.489032	-1.032	0.000501309	0.00535833
ENSG00000176619	LMNB2	lamin B2	198	407	0.488693	-1.033	0.000434075	0.00475162
ENSG00000179364	PACS2	phosphofurin acidic cluster sorting protein 2	59	121	0.488693	-1.033	1.34e-05	0.000277251
ENSG00000104884	ERCC2	ERCC excision repair 2, TFIIH core complex helicase subunit	58	118	0.488693	-1.033	1.09e-05	0.000234541
ENSG00000160741	CRTC2	CREB regulated transcription coactivator 2	134	275	0.488693	-1.033	2.01e-06	6.02e-05
ENSG00000099817	POLR2E	RNA polymerase II subunit E	128	261	0.488354	-1.034	0.000237636	0.00290618
ENSG00000122515	ZMIZ2	zinc finger MIZ-type containing 2	182	373	0.488354	-1.034	1.15e-05	0.000244231
ENSG00000111676	ATN1	atrophin 1	158	323	0.488354	-1.034	2.8e-06	7.92e-05
ENSG00000117266	CDK18	cyclin dependent kinase 18	55	111	0.488016	-1.035	0.0036349	0.0246754
ENSG00000142507	PSMB6	proteasome subunit beta 6	392	804	0.487678	-1.036	3.93e-08	2.5e-06
ENSG00000105499	PLA2G4C	phospholipase A2 group IVC	36	75	0.487678	-1.036	0.00706699	0.0404623
ENSG00000198959	TGM2	transglutaminase 2	92	189	0.487678	-1.036	0.00375795	0.0252884
ENSG00000123815	COQ8B	coenzyme Q8B	50	102	0.487002	-1.038	2.3e-05	0.00043268
ENSG00000172794	RAB37	RAB37, member RAS oncogene family	88	180	0.487002	-1.038	3.36e-06	9.24e-05
ENSG00000186635	ARAP1	ArfGAP with RhoGAP domain, ankyrin repeat and PH domain 1	231	475	0.487002	-1.038	1.11e-10	2.75e-08
ENSG00000162585	FAAP20	Fanconi anemia core complex associated protein 20	22	44	0.487002	-1.038	0.00659151	0.0382592
ENSG00000005206	SPPL2B	signal peptide peptidase like 2B	141	291	0.487002	-1.038	3.36e-05	0.000583635
ENSG00000149782	PLCB3	phospholipase C beta 3	238	487	0.486327	-1.04	6.13e-06	0.000146368
ENSG00000136848	DAB2IP	DAB2 interacting protein	305	625	0.486327	-1.04	3.85e-07	1.57e-05
ENSG00000155363	MOV10	Mov10 RISC complex RNA helicase	214	441	0.486327	-1.04	6.2e-09	5.7e-07
ENSG00000166578	IQCD	IQ motif containing D	16	33	0.48599	-1.041	0.0065737	0.0382049
ENSG00000130529	TRPM4	transient receptor potential cation channel subfamily M member 4	428	883	0.48599	-1.041	7.49e-08	4.11e-06
ENSG00000133895	MEN1	menin 1	66	137	0.485654	-1.042	1.12e-05	0.000237914
ENSG00000065029	ZNF76	zinc finger protein 76	98	204	0.485654	-1.042	1.05e-05	0.000227867
ENSG00000213563	C8orf82	chromosome 8 open reading frame 82	32	66	0.485317	-1.043	0.00370263	0.0250124
ENSG00000105229	PIAS4	protein inhibitor of activated STAT 4	43	88	0.485317	-1.043	0.00120585	0.0106863
[truncated: 1,327 more rows]

## Sheet: SI  INR_vs_HC
Id	short_name	description	HC	INR	FoldChange	log2FoldChange	pvalue	padj
ENSG00000023445	BIRC3	baculoviral IAP repeat containing 3	992	1706	1.719	0.782	0.000306662	0.0368244
ENSG00000031691	CENPQ	centromere protein Q	69	123	1.766	0.821	0.000544239	0.0461919
ENSG00000071203	MS4A12	membrane spanning 4-domains A12	5288	14466	2.735	1.452	1.66e-06	0.00285667
ENSG00000075420	FNDC3B	fibronectin type III domain containing 3B	973	1366	1.405	0.49	0.000255067	0.0349717
ENSG00000087448	KLHL42	kelch like family member 42	457	718	1.569	0.65	0.000423893	0.0416468
ENSG00000104549	SQLE	squalene epoxidase	308	703	2.283	1.191	9.04e-05	0.0229021
ENSG00000110848	CD69	CD69 molecule	99	168	1.679	0.748	0.000489292	0.0433438
ENSG00000117281	CD160	CD160 molecule	29	81	2.777	1.474	0.000403507	0.0408469
ENSG00000118473	SGIP1	SH3 domain GRB2 like endophilin interacting protein 1	10	34	3.507	1.81	0.000198423	0.0331611
ENSG00000134242	PTPN22	protein tyrosine phosphatase, non-receptor type 22	177	327	1.855	0.892	5.51e-05	0.0212794
ENSG00000134333	LDHA	lactate dehydrogenase A	9777	14082	1.44	0.527	0.000594853	0.0489501
ENSG00000134539	KLRD1	killer cell lectin like receptor D1	101	266	2.646	1.404	1.23e-09	9.97e-06
ENSG00000145365	TIFA	TRAF interacting protein with forkhead associated domain	163	258	1.58	0.66	6.09e-05	0.0214918
ENSG00000148346	LCN2	lipocalin 2	66	157	2.393	1.259	0.000117174	0.0257203
ENSG00000153563	CD8A	CD8a molecule	90	210	2.348	1.231	0.000196967	0.0331611
ENSG00000164816	DEFA5	defensin alpha 5	4	129	29.167	4.866	0.000357437	0.0381211
ENSG00000166889	PATL1	PAT1 homolog 1, processing body mRNA decay factor	826	1120	1.354	0.438	0.000439719	0.0416859
ENSG00000170745	KCNS3	potassium voltage-gated channel modifier subfamily S member 3	82	282	3.403	1.767	1.36e-05	0.0105333
ENSG00000171476	HOPX	HOP homeobox	22	54	2.456	1.296	2.1e-05	0.0130871
ENSG00000172785	CBWD1	COBW domain containing 1	317	580	1.828	0.87	7.78e-05	0.0225
ENSG00000198833	UBE2J1	ubiquitin conjugating enzyme E2 J1	2128	3065	1.441	0.527	0.000482084	0.0429399
ENSG00000206075	SERPINB5	serpin family B member 5	53	158	2.959	1.565	0.000312806	0.0372672
ENSG00000211941	IGHV3-11	immunoglobulin heavy variable 3-11 (gene/pseudogene)	197	613	3.108	1.636	1.15e-05	0.00982045
ENSG00000255819	KLRC4-KLRK1	KLRC4-KLRK1 readthrough	3	22	6.027	2.591	0.00017696	0.0322325
ENSG00000005882	PDK2	pyruvate dehydrogenase kinase 2	325	177	0.544	-0.879	0.000229732	0.0348055
ENSG00000006025	OSBPL7	oxysterol binding protein like 7	282	172	0.605	-0.726	0.000223472	0.0341764
ENSG00000007866	TEAD3	TEA domain transcription factor 3	145	84	0.583	-0.779	6.23e-06	0.00673427
ENSG00000008382	MPND	MPN domain containing	129	55	0.424	-1.238	0.00018221	0.0323417
ENSG00000013364	MVP	major vault protein	1381	800	0.579	-0.789	0.000239876	0.0349113
ENSG00000040487	PQLC2	PQ loop repeat containing 2	42	18	0.428	-1.223	0.00029749	0.0368244
ENSG00000052344	PRSS8	protease, serine 8	673	323	0.48	-1.058	0.000101071	0.0237459
ENSG00000054148	PHPT1	phosphohistidine phosphatase 1	139	65	0.464	-1.106	7.18e-05	0.0215488
ENSG00000063245	EPN1	epsin 1	820	488	0.596	-0.747	0.000464956	0.0425361
ENSG00000064270	ATP2C2	ATPase secretory pathway Ca2+ transporting 2	802	523	0.651	-0.619	0.000221405	0.0341764
ENSG00000064490	RFXANK	regulatory factor X associated ankyrin containing protein	141	73	0.519	-0.946	0.000141756	0.0283705
ENSG00000083845	RPS5	ribosomal protein S5	1735	856	0.493	-1.019	8.63e-06	0.00865015
ENSG00000084636	COL16A1	collagen type XVI alpha 1 chain	82	34	0.418	-1.259	0.000244273	0.0349113
ENSG00000086544	ITPKC	inositol-trisphosphate 3-kinase C	133	77	0.581	-0.785	0.000117408	0.0257203
ENSG00000087086	FTL	ferritin light chain	15296	7422	0.485	-1.043	1.23e-08	6.62e-05
ENSG00000089356	FXYD3	FXYD domain containing ion transport regulator 3	17770	10642	0.599	-0.74	0.000158192	0.0298192
ENSG00000092068	SLC7A8	solute carrier family 7 member 8	346	243	0.704	-0.505	0.000258782	0.0349717
ENSG00000092841	MYL6	myosin light chain 6	15586	9672	0.621	-0.688	6.76e-05	0.0214918
ENSG00000099917	MED15	mediator complex subunit 15	186	114	0.618	-0.695	0.000479808	0.0429399
ENSG00000100284	TOM1	target of myb1 membrane trafficking protein	126	67	0.53	-0.915	0.000540365	0.0461045
ENSG00000100979	PLTP	phospholipid transfer protein	110	48	0.437	-1.194	0.000105289	0.0243834
ENSG00000101276	SLC52A3	solute carrier family 52 member 3	250	113	0.449	-1.156	1.54e-05	0.0108684
ENSG00000103044	HAS3	hyaluronan synthase 3	431	192	0.446	-1.164	0.000351817	0.0377702
ENSG00000103184	SEC14L5	SEC14 like lipid binding 5	64	17	0.27	-1.89	0.000433545	0.0416859
ENSG00000103363	ELOB	elongin B	150	52	0.345	-1.537	5.15e-05	0.0203589
ENSG00000103528	SYT17	synaptotagmin 17	80	40	0.507	-0.979	0.000185539	0.0323417
ENSG00000104522	TSTA3	tissue specific transplantation antigen P35B	267	173	0.644	-0.635	0.000511807	0.0443684
ENSG00000105251	SHD	Src homology 2 domain containing transforming protein D	20	6	0.287	-1.8	0.000406789	0.0408469
ENSG00000105321	CCDC9	coiled-coil domain containing 9	124	67	0.543	-0.882	4.19e-05	0.0183697
ENSG00000105523	FAM83E	family with sequence similarity 83 member E	334	169	0.509	-0.975	0.000300134	0.0368244
ENSG00000105619	TFPT	TCF3 fusion partner	75	35	0.472	-1.082	0.000497687	0.0436108
ENSG00000105669	COPE	coatomer protein complex subunit epsilon	102	48	0.468	-1.096	0.000251966	0.0349113
ENSG00000105699	LSR	lipolysis stimulated lipoprotein receptor	429	215	0.502	-0.995	0.000345844	0.0376274
ENSG00000106178	CCL24	C-C motif chemokine ligand 24	263	102	0.391	-1.354	0.000158014	0.0298192
ENSG00000107021	TBC1D13	TBC1 domain family member 13	186	114	0.608	-0.717	6.19e-05	0.0214918
ENSG00000107140	TESK1	testis-specific kinase 1	124	70	0.567	-0.82	0.000258874	0.0349717
ENSG00000107738	VSIR	V-set immunoregulatory receptor	249	135	0.545	-0.875	1.5e-05	0.0108684
ENSG00000107816	LZTS2	leucine zipper tumor suppressor 2	97	46	0.476	-1.072	0.000435927	0.0416859
ENSG00000107829	FBXW4	F-box and WD repeat domain containing 4	298	183	0.614	-0.703	0.000601637	0.0492583
ENSG00000107874	CUEDC2	CUE domain containing 2	79	37	0.47	-1.088	0.000306061	0.0368244
ENSG00000107882	SUFU	SUFU negative regulator of hedgehog signaling	82	46	0.551	-0.859	0.000201036	0.0332161
ENSG00000107954	NEURL1	neuralized E3 ubiquitin protein ligase 1	177	108	0.599	-0.74	0.000469679	0.0425361
ENSG00000108242	CYP2C18	cytochrome P450 family 2 subfamily C member 18	312	161	0.514	-0.96	2.62e-05	0.0151903
ENSG00000110046	ATG2A	autophagy related 2A	66	31	0.472	-1.082	0.000121943	0.0261667
ENSG00000110400	NECTIN1	nectin cell adhesion molecule 1	277	155	0.556	-0.847	9.66e-07	0.00223667
ENSG00000111640	GAPDH	glyceraldehyde-3-phosphate dehydrogenase	14213	10274	0.723	-0.468	0.000468985	0.0425361
ENSG00000114113	RBP2	retinol binding protein 2	69	23	0.333	-1.586	0.000209315	0.0332999
ENSG00000114650	SCAP	SREBF chaperone	510	296	0.578	-0.79	4.62e-08	0.000187086
ENSG00000114841	DNAH1	dynein axonemal heavy chain 1	125	65	0.52	-0.944	0.000439607	0.0416859
ENSG00000116586	LAMTOR2	late endosomal/lysosomal adaptor, MAPK and MTOR activator 2	215	107	0.5	-1	0.00031668	0.0372672
ENSG00000116809	ZBTB17	zinc finger and BTB domain containing 17	37	14	0.377	-1.408	0.00018368	0.0323417
ENSG00000117308	GALE	UDP-galactose-4-epimerase	428	251	0.586	-0.771	0.000328022	0.0374651
ENSG00000119650	IFT43	intraflagellar transport 43	146	80	0.539	-0.891	0.000244984	0.0349113
ENSG00000121775	TMEM39B	transmembrane protein 39B	58	27	0.453	-1.142	8.57e-05	0.0227772
ENSG00000121900	TMEM54	transmembrane protein 54	428	211	0.493	-1.02	0.000427697	0.0416859
ENSG00000123384	LRP1	LDL receptor related protein 1	616	290	0.47	-1.089	5.82e-05	0.0214515
ENSG00000124702	KLHDC3	kelch domain containing 3	612	366	0.6	-0.736	0.000134484	0.0275964
ENSG00000125912	NCLN	nicalin	115	50	0.434	-1.205	0.000396528	0.0406843
ENSG00000125971	DYNLRB1	dynein light chain roadblock-type 1	725	448	0.619	-0.693	0.000516752	0.0445588
ENSG00000126432	PRDX5	peroxiredoxin 5	1561	820	0.526	-0.927	0.000337407	0.0374651
ENSG00000126522	ASL	argininosuccinate lyase	129	60	0.466	-1.102	0.00045241	0.0422518
ENSG00000126768	TIMM17B	translocase of inner mitochondrial membrane 17B	137	77	0.558	-0.842	0.000381461	0.0396402
ENSG00000126822	PLEKHG3	pleckstrin homology and RhoGEF domain containing G3	318	198	0.623	-0.682	0.000247144	0.0349113
ENSG00000128298	BAIAP2L2	BAI1 associated protein 2 like 2	199	97	0.488	-1.035	0.000451059	0.0422518
ENSG00000129925	TMEM8A	transmembrane protein 8A	115	50	0.442	-1.178	4.05e-06	0.00554969
ENSG00000130165	ELOF1	elongation factor 1 homolog	331	198	0.601	-0.735	1.78e-05	0.0119554
ENSG00000130255	RPL36	ribosomal protein L36	788	346	0.439	-1.186	0.000453508	0.0422518
ENSG00000130513	GDF15	growth differentiation factor 15	14	4	0.263	-1.925	0.000212696	0.0334759
ENSG00000130529	TRPM4	transient receptor potential cation channel subfamily M member 4	779	428	0.551	-0.859	9.37e-06	0.00865015
ENSG00000130675	MNX1	motor neuron and pancreas homeobox 1	37	15	0.377	-1.409	0.000292665	0.0367783
ENSG00000131165	CHMP1A	charged multivesicular body protein 1A	376	180	0.479	-1.061	0.000268279	0.0359427
ENSG00000131748	STARD3	StAR related lipid transfer domain containing 3	162	84	0.516	-0.954	0.00024048	0.0349113
ENSG00000132517	SLC52A1	solute carrier family 52 member 1	13	2	0.144	-2.798	0.000157364	0.0298192
ENSG00000135390	ATP5G2	ATP synthase, H+ transporting, mitochondrial Fo complex subunit C2 (subunit 9)	3008	1747	0.581	-0.784	8.08e-07	0.00218299
ENSG00000135631	RAB11FIP5	RAB11 family interacting protein 5	117	62	0.532	-0.911	0.000207494	0.0332999
ENSG00000136059	VILL	villin like	640	392	0.612	-0.709	0.000215527	0.0335952
ENSG00000136830	FAM129B	family with sequence similarity 129 member B	718	373	0.52	-0.944	9.41e-05	0.0234666
ENSG00000136942	RPL35	ribosomal protein L35	1294	619	0.478	-1.063	0.0001145	0.0257203
ENSG00000137700	SLC37A4	solute carrier family 37 member 4	515	353	0.684	-0.547	6.86e-05	0.0214918
ENSG00000138080	EMILIN1	elastin microfibril interfacer 1	80	31	0.396	-1.336	0.000394361	0.0406843
ENSG00000139410	SDSL	serine dehydratase like	58	22	0.397	-1.331	0.000303788	0.0368244
ENSG00000140365	COMMD4	COMM domain containing 4	385	226	0.587	-0.768	3.84e-05	0.0172851
ENSG00000140564	FURIN	furin, paired basic amino acid cleaving enzyme	197	116	0.59	-0.761	0.000617882	0.0495866
ENSG00000141736	ERBB2	erb-b2 receptor tyrosine kinase 2	1428	823	0.577	-0.794	0.000286221	0.0367783
ENSG00000141905	NFIC	nuclear factor I C	241	150	0.624	-0.68	0.000460448	0.0424109
ENSG00000142273	CBLC	Cbl proto-oncogene C	106	44	0.408	-1.292	4.85e-05	0.0196378
ENSG00000142507	PSMB6	proteasome subunit beta 6	619	392	0.634	-0.658	0.000509062	0.0443677
ENSG00000142684	ZNF593	zinc finger protein 593	15	3	0.215	-2.22	0.000377654	0.0396264
ENSG00000142784	WDTC1	WD and tetratricopeptide repeats 1	282	170	0.601	-0.734	3.21e-05	0.0162704
ENSG00000143374	TARS2	threonyl-tRNA synthetase 2, mitochondrial (putative)	304	206	0.684	-0.548	0.0004384	0.0416859
ENSG00000144485	HES6	hes family bHLH transcription factor 6	32	12	0.365	-1.455	0.000339466	0.0374651
ENSG00000148343	MIGA2	mitoguardin 2	149	80	0.533	-0.907	0.000408192	0.0408469
ENSG00000149115	TNKS1BP1	tankyrase 1 binding protein 1	509	299	0.588	-0.766	0.000234528	0.0348802
ENSG00000149577	SIDT2	SID1 transmembrane family member 2	434	243	0.562	-0.833	9.6e-06	0.00865015
ENSG00000152292	SH2D6	SH2 domain containing 6	65	19	0.291	-1.783	1.76e-06	0.00285667
ENSG00000155363	MOV10	Mov10 RISC complex RNA helicase	330	214	0.649	-0.623	0.000549848	0.0464249
ENSG00000158747	NBL1	neuroblastoma 1, DAN family BMP antagonist	86	34	0.392	-1.351	0.000292331	0.0367783
ENSG00000159189	C1QC	complement C1q C chain	204	90	0.443	-1.176	0.000145451	0.028755
ENSG00000159212	CLIC6	chloride intracellular channel 6	107	37	0.335	-1.576	7.94e-10	9.97e-06
ENSG00000160014	CALM3	calmodulin 3	2224	1552	0.698	-0.519	0.000166948	0.0307546
ENSG00000160180	TFF3	trefoil factor 3	1218	534	0.438	-1.19	0.000122674	0.0261667
ENSG00000160325	CACFD1	calcium channel flower domain containing 1	110	44	0.397	-1.332	7.33e-05	0.021601
ENSG00000160446	ZDHHC12	zinc finger DHHC-type containing 12	39	13	0.329	-1.605	9.89e-05	0.0235847
ENSG00000162390	ACOT11	acyl-CoA thioesterase 11	385	246	0.64	-0.645	0.000140782	0.0283705
ENSG00000162522	KIAA1522	KIAA1522	1768	1274	0.721	-0.472	0.000529006	0.0453741
ENSG00000162706	CADM3	cell adhesion molecule 3	59	20	0.344	-1.54	0.000339731	0.0374651
ENSG00000163295	ALPI	alkaline phosphatase, intestinal	59	21	0.356	-1.49	7.91e-05	0.0225
ENSG00000163435	ELF3	E74 like ETS transcription factor 3	3590	2419	0.674	-0.57	0.000612184	0.0494726
ENSG00000163501	IHH	indian hedgehog	160	63	0.394	-1.342	6.79e-05	0.0214918
ENSG00000163517	HDAC11	histone deacetylase 11	133	73	0.55	-0.863	0.000274106	0.036242
ENSG00000163870	TPRA1	transmembrane protein adipocyte associated 1	62	29	0.465	-1.104	8.89e-05	0.0228873
ENSG00000163930	BAP1	BRCA1 associated protein 1	407	228	0.558	-0.841	1.84e-05	0.0119554
ENSG00000164062	APEH	acylaminoacyl-peptide hydrolase	535	347	0.649	-0.624	0.000565476	0.047497
ENSG00000164068	RNF123	ring finger protein 123	137	79	0.583	-0.78	0.00058929	0.0488662
ENSG00000164885	CDK5	cyclin dependent kinase 5	79	38	0.486	-1.042	0.000274984	0.036242
ENSG00000165215	CLDN3	claudin 3	37	12	0.34	-1.555	0.000232547	0.0348802
ENSG00000165457	FOLR2	folate receptor beta	108	47	0.437	-1.193	0.000477976	0.0429399
ENSG00000166169	POLL	DNA polymerase lambda	161	102	0.628	-0.672	0.000338351	0.0374651
ENSG00000166391	MOGAT2	monoacylglycerol O-acyltransferase 2	1409	879	0.624	-0.68	9.62e-05	0.0235847
ENSG00000166482	MFAP4	microfibril associated protein 4	445	228	0.513	-0.962	9.84e-05	0.0235847
ENSG00000167657	DAPK3	death associated protein kinase 3	54	28	0.507	-0.98	0.000399854	0.0407675
ENSG00000167861	HID1	HID1 domain containing	131	71	0.538	-0.894	0.000363358	0.0384993
ENSG00000167930	FAM234A	family with sequence similarity 234 member A	116	54	0.468	-1.097	0.000209524	0.0332999
ENSG00000168306	ACOX2	acyl-CoA oxidase 2	178	93	0.523	-0.935	0.000320268	0.0373516
ENSG00000168487	BMP1	bone morphogenetic protein 1	135	71	0.527	-0.924	0.000150771	0.0294475
ENSG00000168528	SERINC2	serine incorporator 2	479	189	0.396	-1.337	0.000179042	0.0322495
ENSG00000169223	LMAN2	lectin, mannose binding 2	542	285	0.526	-0.927	0.000343034	0.0375739
ENSG00000169976	SF3B5	splicing factor 3b subunit 5	396	201	0.507	-0.979	0.000613411	0.0494726
ENSG00000170889	RPS9	ribosomal protein S9	3684	1828	0.496	-1.011	4.41e-05	0.0188105
ENSG00000170906	NDUFA3	NADH:ubiquinone oxidoreductase subunit A3	242	97	0.402	-1.315	5.78e-05	0.0214515
ENSG00000171298	GAA	glucosidase alpha, acid	60	26	0.428	-1.225	0.000459353	0.0424109
ENSG00000173020	GRK2	G protein-coupled receptor kinase 2	244	136	0.554	-0.852	0.0002491	0.0349113
ENSG00000173327	MAP3K11	mitogen-activated protein kinase kinase kinase 11	168	94	0.566	-0.82	0.000581031	0.048552
ENSG00000173369	C1QB	complement C1q B chain	451	233	0.519	-0.946	0.000110067	0.0251309
ENSG00000173372	C1QA	complement C1q A chain	560	214	0.383	-1.385	1.67e-06	0.00285667
ENSG00000174886	NDUFA11	NADH:ubiquinone oxidoreductase subunit A11	22	7	0.318	-1.651	0.00020285	0.0332161
ENSG00000174903	RAB1B	RAB1B, member RAS oncogene family	1330	806	0.606	-0.723	3.34e-05	0.0163951
ENSG00000175274	TP53I11	tumor protein p53 inducible protein 11	444	296	0.669	-0.579	0.000494536	0.0435702
ENSG00000177239	MAN1B1	mannosidase alpha class 1B member 1	231	131	0.568	-0.817	0.000290883	0.0367783
ENSG00000177628	GBA	glucosylceramidase beta	615	388	0.631	-0.663	6.89e-05	0.0214918
ENSG00000177830	CHID1	chitinase domain containing 1	217	130	0.602	-0.733	8.11e-05	0.022652
ENSG00000177951	BET1L	Bet1 golgi vesicular membrane trafficking protein like	378	260	0.685	-0.546	0.000287018	0.0367783
ENSG00000178814	OPLAH	5-oxoprolinase (ATP-hydrolysing)	11	3	0.209	-2.257	0.000351135	0.0377702
ENSG00000178896	EXOSC4	exosome component 4	22	6	0.266	-1.913	6.57e-05	0.0214918
ENSG00000178982	EIF3K	eukaryotic translation initiation factor 3 subunit K	2566	1610	0.628	-0.672	3.6e-05	0.016662
ENSG00000179091	CYC1	cytochrome c1	457	253	0.555	-0.851	0.000414253	0.0411991
ENSG00000179639	FCER1A	Fc fragment of IgE receptor Ia	91	34	0.385	-1.379	4.7e-05	0.0195269
ENSG00000180061	TMEM150B	transmembrane protein 150B	91	42	0.46	-1.122	2.9e-05	0.0156512
ENSG00000181035	SLC25A42	solute carrier family 25 member 42	63	23	0.358	-1.482	4.2e-06	0.00554969
ENSG00000182580	EPHB3	EPH receptor B3	101	42	0.411	-1.283	4.61e-06	0.00554969
ENSG00000183506	PI4KAP2	phosphatidylinositol 4-kinase alpha pseudogene 2	74	37	0.513	-0.964	2.49e-05	0.0149495
ENSG00000183773	AIFM3	apoptosis inducing factor, mitochondria associated 3	301	169	0.561	-0.835	0.000590819	0.0488662
ENSG00000184232	OAF	out at first homolog	607	372	0.613	-0.706	8.85e-05	0.0228873
ENSG00000184545	DUSP8	dual specificity phosphatase 8	41	19	0.473	-1.08	0.000250704	0.0349113
ENSG00000184730	APOBR	apolipoprotein B receptor	1928	1050	0.545	-0.875	0.000197627	0.0331611
ENSG00000185168	LINC00482	long intergenic non-protein coding RNA 482	79	35	0.44	-1.184	0.000317246	0.0372672
ENSG00000185324	CDK10	cyclin dependent kinase 10	352	210	0.599	-0.741	0.000423572	0.0416468
ENSG00000196576	PLXNB2	plexin B2	321	162	0.505	-0.986	0.00012479	0.0262724
ENSG00000196656	AC004057.1		113	20	0.181	-2.464	0.000378885	0.0396264
ENSG00000197070	ARRDC1	arrestin domain containing 1	73	34	0.464	-1.109	0.000333418	0.0374651
ENSG00000197728	RPS26	ribosomal protein S26	4542	2421	0.533	-0.908	0.000164371	0.0306278
ENSG00000198488	B3GNT6	UDP-GlcNAc:betaGal beta-1,3-N-acetylglucosaminyltransferase 6	312	148	0.474	-1.078	0.000302086	0.0368244
ENSG00000198788	MUC2	mucin 2, oligomeric mucus/gel-forming	4114	1849	0.449	-1.154	0.000336109	0.0374651
ENSG00000204099	NEU4	neuraminidase 4	101	36	0.353	-1.501	8.38e-05	0.022652
ENSG00000204536	CCHCR1	coiled-coil alpha-helical rod protein 1	322	197	0.61	-0.713	3.13e-05	0.0162704
ENSG00000205336	ADGRG1	adhesion G protein-coupled receptor G1	275	178	0.644	-0.635	0.000337565	0.0374651
ENSG00000205362	MT1A	metallothionein 1A	17	2	0.124	-3.008	6.83e-05	0.0214918
ENSG00000205572	SERF1B	small EDRK-rich factor 1B	48	16	0.33	-1.598	4.79e-06	0.00554969
ENSG00000214253	FIS1	fission, mitochondrial 1	476	233	0.49	-1.029	7.08e-05	0.0215488
ENSG00000224597	SVIL-AS1	SVIL antisense RNA 1	183	121	0.663	-0.592	0.000287646	0.0367783
ENSG00000234155	LINC02535	long intergenic non-protein coding RNA 2535	794	208	0.263	-1.929	2.09e-07	0.000676436
ENSG00000240583	AQP1	aquaporin 1 (Colton blood group)	439	292	0.667	-0.585	8.29e-05	0.022652
ENSG00000252835	SCARNA21	small Cajal body-specific RNA 21	13	1	0.11	-3.189	0.000192457	0.0331611
ENSG00000253755	IGHGP	immunoglobulin heavy constant gamma P (non-functional)	12	0	0.023	-5.419	2.84e-05	0.0156512
ENSG00000260908	AC009093.3		59	15	0.258	-1.954	1.36e-05	0.0105333
ENSG00000266019	MIR3609	microRNA 3609	86	18	0.214	-2.223	0.00012702	0.026399
ENSG00000267795	SMIM22	small integral membrane protein 22	647	322	0.498	-1.006	3.59e-05	0.016662
ENSG00000277496	AL357033.4		30	10	0.344	-1.541	0.000612109	0.0494726

## Sheet: SI IR_vs_HC
Id	short_name	description	HC	nonINR	FoldChange	log2FoldChange	pvalue	padj
ENSG00000002726	AOC1	amine oxidase, copper containing 1	918	1805	1.966	0.976	0.000173869	0.0241154
ENSG00000006282	SPATA20	spermatogenesis associated 20	173	300	1.727	0.788	0.000427794	0.0366477
ENSG00000012223	LTF	lactotransferrin	15	136	8.828	3.142	0.00046047	0.0367144
ENSG00000013364	MVP	major vault protein	1381	2224	1.61	0.687	0.00065684	0.0436462
ENSG00000030582	GRN	granulin precursor	597	1064	1.783	0.835	0.000287063	0.0297097
ENSG00000051523	CYBA	cytochrome b-245 alpha chain	107	245	2.301	1.202	0.000416879	0.0362385
ENSG00000052344	PRSS8	protease, serine 8	673	1256	1.866	0.9	0.000407916	0.0358228
ENSG00000052802	MSMO1	methylsterol monooxygenase 1	1175	2092	1.781	0.833	0.000526103	0.0392913
ENSG00000063241	ISOC2	isochorismatase domain containing 2	78	184	2.368	1.244	3.01e-05	0.00990967
ENSG00000064932	SBNO2	strawberry notch homolog 2	47	96	2.032	1.023	0.000369202	0.0341385
ENSG00000065518	NDUFB4	NADH:ubiquinone oxidoreductase subunit B4	1153	1817	1.576	0.656	0.000114159	0.020152
ENSG00000067057	PFKP	phosphofructokinase, platelet	189	296	1.569	0.649	0.000357967	0.0336335
ENSG00000067225	PKM	pyruvate kinase, muscle	3153	4672	1.482	0.567	0.000150482	0.022653
ENSG00000067829	IDH3G	isocitrate dehydrogenase 3 (NAD(+)) gamma	175	301	1.715	0.778	0.000247414	0.0283202
ENSG00000071203	MS4A12	membrane spanning 4-domains A12	5288	12766	2.414	1.271	8.62e-06	0.00461749
ENSG00000074800	ENO1	enolase 1	4279	6235	1.457	0.543	5.64e-06	0.00400773
ENSG00000075275	CELSR1	cadherin EGF LAG seven-pass G-type receptor 1	16	36	2.158	1.109	0.000826029	0.0489345
ENSG00000077150	NFKB2	nuclear factor kappa B subunit 2	122	220	1.809	0.855	0.000695168	0.0449441
ENSG00000077984	CST7	cystatin F	9	28	3.073	1.62	0.000425909	0.0366477
ENSG00000078808	SDF4	stromal cell derived factor 4	317	597	1.885	0.914	0.000337128	0.0320198
ENSG00000083845	RPS5	ribosomal protein S5	1735	2985	1.72	0.782	0.00027688	0.0292879
ENSG00000085117	CD82	CD82 molecule	184	431	2.348	1.231	0.000532571	0.0396051
ENSG00000087088	BAX	BCL2 associated X, apoptosis regulator	274	521	1.897	0.924	0.000105652	0.0192553
ENSG00000095383	TBC1D2	TBC1 domain family member 2	68	122	1.786	0.836	0.0006007	0.041658
ENSG00000099785	2002-03-01	membrane associated ring-CH-type finger 2	63	118	1.892	0.92	0.000149913	0.022653
ENSG00000099797	TECR	trans-2,3-enoyl-CoA reductase	292	513	1.759	0.815	9.24e-05	0.0181745
ENSG00000099840	IZUMO4	IZUMO family member 4	3	14	5.162	2.368	0.000583365	0.0409433
ENSG00000099956	SMARCB1	SWI/SNF related, matrix associated, actin dependent regulator of chromatin, subfamily b, member 1	262	462	1.762	0.817	0.000160978	0.022872
ENSG00000100038	TOP3B	topoisomerase (DNA) III beta	69	109	1.582	0.661	0.000442328	0.0367144
ENSG00000100075	SLC25A1	solute carrier family 25 member 1	209	357	1.711	0.775	2.95e-05	0.00990737
ENSG00000100243	CYB5R3	cytochrome b5 reductase 3	318	472	1.481	0.567	0.00079525	0.0481039
ENSG00000100284	TOM1	target of myb1 membrane trafficking protein	126	221	1.748	0.805	0.000829036	0.0489467
ENSG00000100299	ARSA	arylsulfatase A	78	162	2.092	1.065	0.000289005	0.0297097
ENSG00000100379	KCTD17	potassium channel tetramerization domain containing 17	53	122	2.281	1.19	0.000462496	0.0367144
ENSG00000100385	IL2RB	interleukin 2 receptor subunit beta	58	101	1.756	0.812	0.000795493	0.0481039
ENSG00000100412	ACO2	aconitase 2	1166	1723	1.476	0.562	0.000512763	0.0389661
ENSG00000101199	ARFGAP1	ADP ribosylation factor GTPase activating protein 1	153	266	1.725	0.787	0.000493204	0.0381616
ENSG00000101224	CDC25B	cell division cycle 25B	144	229	1.593	0.671	0.000443449	0.0367144
ENSG00000101986	ABCD1	ATP binding cassette subfamily D member 1	8	25	2.942	1.557	0.000105774	0.0192553
ENSG00000102225	CDK16	cyclin dependent kinase 16	470	710	1.509	0.593	0.000374154	0.0342341
ENSG00000102879	CORO1A	coronin 1A	86	301	3.475	1.797	0.000566173	0.0403854
ENSG00000103653	CSK	C-terminal Src kinase	136	287	2.105	1.074	3.37e-05	0.010341
ENSG00000104518	GSDMD	gasdermin D	91	176	1.929	0.948	0.0001029	0.0192553
ENSG00000104522	TSTA3	tissue specific transplantation antigen P35B	267	418	1.562	0.644	0.000133167	0.0211849
ENSG00000104549	SQLE	squalene epoxidase	308	684	2.223	1.152	5.99e-05	0.0140781
ENSG00000104722	NEFM	neurofilament medium	12	43	3.663	1.873	1.29e-05	0.0062686
ENSG00000104774	MAN2B1	mannosidase alpha class 2B member 1	218	383	1.757	0.813	9.26e-05	0.0181745
ENSG00000104853	CLPTM1	CLPTM1, transmembrane protein	296	491	1.654	0.726	0.000583006	0.0409433
ENSG00000104960	PTOV1	prostate tumor overexpressed 1	180	335	1.851	0.888	3.8e-05	0.0104586
ENSG00000105374	NKG7	natural killer cell granule protein 7	28	71	2.53	1.339	0.000494017	0.0381616
ENSG00000105639	JAK3	Janus kinase 3	126	299	2.372	1.246	0.000704045	0.0450692
ENSG00000105640	RPL18A	ribosomal protein L18a	1728	2889	1.672	0.742	0.000833902	0.0490682
ENSG00000105669	COPE	coatomer protein complex subunit epsilon	102	211	2.057	1.041	0.00011838	0.0202825
ENSG00000105699	LSR	lipolysis stimulated lipoprotein receptor	429	844	1.973	0.98	0.000158419	0.0226929
ENSG00000105701	FKBP8	FK506 binding protein 8	131	254	1.945	0.96	0.000398042	0.035541
ENSG00000105726	ATP13A1	ATPase 13A1	101	174	1.705	0.769	0.000640823	0.0435674
ENSG00000106348	IMPDH1	inosine monophosphate dehydrogenase 1	37	76	2.047	1.034	0.000622751	0.0426792
ENSG00000107223	EDF1	endothelial differentiation related factor 1	800	1493	1.867	0.901	0.000620329	0.0426792
ENSG00000108107	RPL28	ribosomal protein L28	2525	3813	1.51	0.595	0.000683177	0.0449441
ENSG00000108298	RPL19	ribosomal protein L19	5572	8827	1.584	0.664	0.000192489	0.0252927
ENSG00000108602	ALDH3A1	aldehyde dehydrogenase 3 family member A1	15	49	3.282	1.714	0.000439273	0.0367144
ENSG00000108622	ICAM2	intercellular adhesion molecule 2	36	95	2.615	1.387	0.000446325	0.0367144
ENSG00000108639	SYNGR2	synaptogyrin 2	277	487	1.76	0.816	8.85e-05	0.0179764
ENSG00000108774	RAB5C	RAB5C, member RAS oncogene family	591	1125	1.901	0.927	1.91e-05	0.00726421
ENSG00000110047	EHD1	EH domain containing 1	232	398	1.711	0.775	0.000736354	0.0461702
ENSG00000110080	ST3GAL4	ST3 beta-galactoside alpha-2,3-sialyltransferase 4	583	1089	1.864	0.898	0.000244315	0.0282759
ENSG00000110711	AIP	aryl hydrocarbon receptor interacting protein	82	179	2.175	1.121	1.55e-05	0.00685202
ENSG00000110719	TCIRG1	T-cell immune regulator 1, ATPase H+ transporting V0 subunit a3	49	102	2.085	1.06	0.000226283	0.0269015
ENSG00000110921	MVK	mevalonate kinase	49	102	2.062	1.044	7.66e-05	0.0161313
ENSG00000111640	GAPDH	glyceraldehyde-3-phosphate dehydrogenase	14213	20097	1.414	0.5	7.46e-05	0.0158921
ENSG00000113504	SLC12A7	solute carrier family 12 member 7	177	308	1.727	0.789	0.000332895	0.0319652
ENSG00000116133	DHCR24	24-dehydrocholesterol reductase	2174	3090	1.422	0.507	0.000397528	0.035541
ENSG00000116260	QSOX1	quiescin sulfhydryl oxidase 1	1204	2109	1.752	0.809	2.88e-09	1.01e-05
ENSG00000116586	LAMTOR2	late endosomal/lysosomal adaptor, MAPK and MTOR activator 2	215	438	2.042	1.03	5.81e-05	0.0140781
ENSG00000117215	PLA2G2D	phospholipase A2 group IID	10	86	8.745	3.128	0.000454831	0.0367144
ENSG00000117298	ECE1	endothelin converting enzyme 1	658	980	1.489	0.574	0.00017532	0.0241251
ENSG00000117308	GALE	UDP-galactose-4-epimerase	428	706	1.647	0.72	0.000314836	0.0310851
ENSG00000117448	AKR1A1	aldo-keto reductase family 1 member A1	1179	1535	1.301	0.379	0.000813993	0.0485506
ENSG00000117983	MUC5B	mucin 5B, oligomeric mucus/gel-forming	278	579	2.088	1.062	0.000808575	0.0485373
ENSG00000119403	PHF19	PHD finger protein 19	88	148	1.681	0.75	0.000690197	0.0449441
ENSG00000119673	ACOT2	acyl-CoA thioesterase 2	111	179	1.617	0.693	0.000650669	0.0435674
ENSG00000120885	CLU	clusterin	139	505	3.631	1.86	0.000443315	0.0367144
ENSG00000121900	TMEM54	transmembrane protein 54	428	834	1.95	0.963	0.000367059	0.0341209
ENSG00000122971	ACADS	acyl-CoA dehydrogenase, C-2 to C-3 short chain	233	462	1.983	0.987	0.000152589	0.022653
ENSG00000123146	ADGRE5	adhesion G protein-coupled receptor E5	360	694	1.929	0.948	7.43e-06	0.00422808
ENSG00000124256	ZBP1	Z-DNA binding protein 1	70	122	1.742	0.8	0.000311916	0.0309718
ENSG00000125734	GPR108	G protein-coupled receptor 108	246	420	1.707	0.772	0.000462405	0.0367144
ENSG00000125746	EML2	echinoderm microtubule associated protein like 2	591	1015	1.717	0.78	0.000777242	0.0474933
ENSG00000125844	RRBP1	ribosome binding protein 1	2287	3329	1.455	0.541	0.000656389	0.0436462
ENSG00000125995	ROMO1	reactive oxygen species modulator 1	87	162	1.866	0.9	0.000259282	0.0289881
ENSG00000127191	TRAF2	TNF receptor associated factor 2	41	80	1.967	0.976	9.72e-05	0.0188685
ENSG00000127554	GFER	growth factor, augmenter of liver regeneration	208	360	1.732	0.793	0.000688395	0.0449441
ENSG00000127837	AAMP	angio associated migratory cell protein	896	1392	1.553	0.635	0.000212749	0.026159
ENSG00000128298	BAIAP2L2	BAI1 associated protein 2 like 2	199	409	2.058	1.041	0.000131933	0.0211849
ENSG00000128335	APOL2	apolipoprotein L2	600	886	1.483	0.569	0.00059796	0.0416333
ENSG00000128340	RAC2	ras-related C3 botulinum toxin substrate 2 (rho family, small GTP binding protein Rac2)	180	351	1.947	0.961	0.000857799	0.0494749
ENSG00000129048	ACKR4	atypical chemokine receptor 4	19	62	3.254	1.702	1.87e-05	0.00726421
ENSG00000129465	RIPK3	receptor interacting serine/threonine kinase 3	232	363	1.56	0.641	0.000340079	0.0321255
ENSG00000130475	FCHO1	FCH domain only 1	8	29	3.679	1.879	0.000300809	0.030371
ENSG00000130707	ASS1	argininosuccinate synthase 1	1634	3598	2.202	1.139	3.56e-09	1.04e-05
ENSG00000130787	HIP1R	huntingtin interacting protein 1 related	117	193	1.629	0.704	0.000430983	0.0367144
ENSG00000130985	UBA1	ubiquitin like modifier activating enzyme 1	1612	2393	1.484	0.569	2.71e-05	0.00927776
ENSG00000131401	NAPSB	napsin B aspartic peptidase, pseudogene	39	131	3.35	1.744	0.000186771	0.0247273
ENSG00000131653	TRAF7	TNF receptor associated factor 7	178	353	1.981	0.986	9.62e-06	0.00494279
ENSG00000132182	NUP210	nucleoporin 210	131	235	1.774	0.827	0.000216856	0.026159
ENSG00000132470	ITGB4	integrin subunit beta 4	193	406	2.101	1.071	2.05e-05	0.00761545
ENSG00000132698	RAB25	RAB25, member RAS oncogene family	1168	1607	1.374	0.459	0.000183453	0.0246617
ENSG00000132819	RBM38	RNA binding motif protein 38	67	134	1.973	0.98	0.000435261	0.0367144
ENSG00000133048	CHI3L1	chitinase 3 like 1	4	20	5.025	2.329	0.000278198	0.0292879
ENSG00000133313	CNDP2	carnosine dipeptidase 2	1908	2669	1.398	0.483	9.53e-07	0.00104046
ENSG00000133321	RARRES3	retinoic acid receptor responder 3	611	1438	2.352	1.234	4.86e-05	0.0124941
ENSG00000133935	ERG28	ergosterol biosynthesis 28 homolog	355	544	1.536	0.619	1.63e-07	0.000218881
ENSG00000135148	TRAFD1	TRAF-type zinc finger domain containing 1	469	688	1.461	0.547	0.00061326	0.042361
ENSG00000135439	AGAP2	ArfGAP with GTPase domain, ankyrin repeat and PH domain 2	24	53	2.189	1.13	0.000820355	0.0487637
ENSG00000135916	ITM2C	integral membrane protein 2C	11468	19474	1.698	0.764	0.000115531	0.0201902
ENSG00000136059	VILL	villin like	640	973	1.52	0.604	0.000744539	0.0463045
ENSG00000136270	TBRG4	transforming growth factor beta regulator 4	242	357	1.474	0.56	0.000747661	0.0463338
ENSG00000137078	SIT1	signaling threshold regulating transmembrane adaptor 1	18	73	3.913	1.968	1.42e-05	0.00654139
ENSG00000137101	CD72	CD72 molecule	18	96	5.219	2.384	0.000373843	0.0342341
ENSG00000138834	MAPK8IP3	mitogen-activated protein kinase 8 interacting protein 3	76	136	1.793	0.842	0.000463336	0.0367144
ENSG00000139192	TAPBPL	TAP binding protein like	201	312	1.558	0.64	0.000456452	0.0367144
ENSG00000140279	DUOX2	dual oxidase 2	65	263	4.112	2.04	1.23e-08	2.69e-05
ENSG00000140464	PML	promyelocytic leukemia	98	165	1.681	0.75	3.09e-05	0.00994891
ENSG00000140853	NLRC5	NLR family CARD domain containing 5	337	633	1.876	0.908	3.13e-05	0.00994891
ENSG00000141503	MINK1	misshapen like kinase 1	741	1124	1.516	0.601	0.000633322	0.0432341
ENSG00000141522	ARHGDIA	Rho GDP dissociation inhibitor alpha	438	755	1.723	0.785	0.000398605	0.035541
ENSG00000141526	SLC16A3	solute carrier family 16 member 3	154	449	2.926	1.549	3.82e-05	0.0104586
ENSG00000141959	PFKL	phosphofructokinase, liver type	274	532	1.938	0.955	0.000132535	0.0211849
ENSG00000142178	SIK1	salt inducible kinase 1	1	12	20.08	4.328	0.000168218	0.0235183
ENSG00000142583	SLC2A5	solute carrier family 2 member 5	93	148	1.603	0.681	0.000237674	0.0280229
ENSG00000142959	BEST4	bestrophin 4	342	536	1.559	0.64	0.000324091	0.0316414
ENSG00000143537	ADAM15	ADAM metallopeptidase domain 15	175	351	2.001	1.001	6.71e-05	0.015032
ENSG00000143761	ARF1	ADP ribosylation factor 1	2423	3300	1.361	0.444	0.000847605	0.0493758
ENSG00000145287	PLAC8	placenta specific 8	5637	8588	1.524	0.608	0.000644378	0.0435674
ENSG00000147155	EBP	emopamil binding protein (sterol isomerase)	731	1262	1.722	0.784	5.57e-06	0.00400773
ENSG00000148341	SH3GLB2	SH3 domain containing GRB2 like, endophilin B2	352	672	1.905	0.93	0.000101466	0.0192553
ENSG00000148346	LCN2	lipocalin 2	66	259	3.939	1.978	1.24e-10	7.24e-07
ENSG00000148357	HMCN2	hemicentin 2	36	83	2.276	1.186	0.000271233	0.0291232
ENSG00000149923	PPP4C	protein phosphatase 4 catalytic subunit	227	375	1.652	0.724	0.000771435	0.0473038
ENSG00000149925	ALDOA	aldolase, fructose-bisphosphate A	2238	4450	1.988	0.992	2.18e-07	0.000271841
ENSG00000153563	CD8A	CD8a molecule	90	217	2.413	1.271	4.74e-05	0.0124941
ENSG00000154016	GRAP	GRB2-related adaptor protein	13	55	4.142	2.05	0.000264134	0.0291232
ENSG00000157873	TNFRSF14	TNF receptor superfamily member 14	238	425	1.779	0.831	0.000222114	0.0265867
ENSG00000157978	LDLRAP1	low density lipoprotein receptor adaptor protein 1	308	455	1.468	0.554	0.00041783	0.0362385
ENSG00000158856	DMTN	dematin actin binding protein	177	276	1.56	0.642	0.000648746	0.0435674
ENSG00000158941	CCAR2	cell cycle and apoptosis regulator 2	549	783	1.425	0.511	0.000270669	0.0291232
ENSG00000159720	ATP6V0D1	ATPase H+ transporting V0 subunit d1	1119	1788	1.596	0.675	0.000181066	0.0246617
ENSG00000160180	TFF3	trefoil factor 3	1218	2657	2.183	1.126	0.000108359	0.0195224
ENSG00000160190	SLC37A1	solute carrier family 37 member 1	256	422	1.641	0.715	7.1e-05	0.0154251
ENSG00000160211	G6PD	glucose-6-phosphate dehydrogenase	50	105	2.096	1.068	0.000214858	0.026159
ENSG00000160285	LSS	lanosterol synthase	153	404	2.622	1.391	7.5e-06	0.00422808
ENSG00000160445	ZER1	zyg-11 related cell cycle regulator	224	355	1.573	0.654	0.000524893	0.0392913
ENSG00000160948	VPS28	VPS28, ESCRT-I subunit	476	781	1.64	0.714	0.000186558	0.0247273
ENSG00000162897	FCAMR	Fc fragment of IgA and IgM receptor	17	60	3.588	1.843	5.76e-05	0.0140781
ENSG00000163508	EOMES	eomesodermin	7	24	3.589	1.844	0.000302389	0.030371
ENSG00000163931	TKT	transketolase	668	1203	1.803	0.851	0.000238923	0.0280229
ENSG00000164062	APEH	acylaminoacyl-peptide hydrolase	535	880	1.643	0.716	2.15e-05	0.0076757
ENSG00000164485	IL22RA2	interleukin 22 receptor subunit alpha 2	3	21	6.591	2.72	0.000681362	0.0449441
ENSG00000166143	PPP1R14D	protein phosphatase 1 regulatory inhibitor subunit 14D	1276	1895	1.484	0.57	0.000492787	0.0381616
ENSG00000166145	SPINT1	serine peptidase inhibitor, Kunitz type 1	1353	2080	1.537	0.62	0.000288961	0.0297097
ENSG00000166165	CKB	creatine kinase B	1427	2909	2.039	1.028	0.000699519	0.0449441
ENSG00000166816	LDHD	lactate dehydrogenase D	90	218	2.405	1.266	2.96e-08	5.75e-05
ENSG00000167508	MVD	mevalonate diphosphate decarboxylase	58	183	3.152	1.656	2.29e-10	1e-06
ENSG00000167617	CDC42EP5	CDC42 effector protein 5	276	530	1.924	0.944	1.57e-05	0.00685202
ENSG00000167657	DAPK3	death associated protein kinase 3	54	95	1.748	0.806	0.000800581	0.0482447
ENSG00000167671	UBXN6	UBX domain protein 6	104	164	1.575	0.656	0.000563949	0.0403854
ENSG00000167701	GPT	glutamic--pyruvic transaminase	59	179	3.026	1.598	1.7e-05	0.00707435
ENSG00000167770	OTUB1	OTU deubiquitinase, ubiquitin aldehyde binding 1	270	383	1.412	0.497	0.000549973	0.0403538
ENSG00000167815	PRDX2	peroxiredoxin 2	515	982	1.907	0.931	0.000591027	0.0413151
ENSG00000168394	TAP1	transporter 1, ATP binding cassette subfamily B member	699	1316	1.879	0.91	8.72e-06	0.00461749
ENSG00000168453	HR	HR, lysine demethylase and nuclear receptor corepressor	150	288	1.922	0.943	0.000516327	0.0389661
ENSG00000168936	TMEM129	transmembrane protein 129	151	313	2.064	1.045	0.000113988	0.020152
ENSG00000168961	LGALS9	galectin 9	888	1464	1.649	0.722	0.000301762	0.030371
ENSG00000169174	PCSK9	proprotein convertase subtilisin/kexin type 9	15	61	3.849	1.944	0.000699274	0.0449441
ENSG00000169230	PRELID1	PRELI domain containing 1	983	1568	1.594	0.673	0.000101453	0.0192553
ENSG00000169994	MYO7B	myosin VIIB	477	860	1.8	0.848	0.000105557	0.0192553
ENSG00000170458	CD14	CD14 molecule	103	180	1.754	0.811	0.000856588	0.0494749
ENSG00000170889	RPS9	ribosomal protein S9	3684	6436	1.747	0.805	0.000555465	0.0403854
ENSG00000171130	ATP6V0E2	ATPase H+ transporting V0 subunit e2	35	86	2.46	1.298	0.000750577	0.0463501
ENSG00000172009	THOP1	thimet oligopeptidase 1	78	168	2.14	1.098	0.000216803	0.026159
ENSG00000172270	BSG	basigin (Ok blood group)	1725	3672	2.129	1.09	6.77e-06	0.00408237
ENSG00000172673	THEMIS	thymocyte selection associated	37	72	1.9	0.926	0.000515409	0.0389661
ENSG00000172725	CORO1B	coronin 1B	159	380	2.388	1.256	2.02e-06	0.00195807
ENSG00000172893	DHCR7	7-dehydrocholesterol reductase	111	253	2.28	1.189	4.82e-06	0.00382705
ENSG00000173020	GRK2	G protein-coupled receptor kinase 2	244	403	1.644	0.717	0.000843801	0.049346
ENSG00000173432	SAA1	serum amyloid A1	2	17	11.51	3.525	0.00030456	0.0304143
ENSG00000173599	PC	pyruvate carboxylase	50	116	2.321	1.215	0.000152956	0.022653
ENSG00000174903	RAB1B	RAB1B, member RAS oncogene family	1330	2049	1.54	0.623	0.000137718	0.0216826
ENSG00000174992	ZG16	zymogen granule protein 16	21745	41847	1.924	0.944	0.000437548	0.0367144
ENSG00000175137	SH3BP5L	SH3 binding domain protein 5 like	235	377	1.605	0.682	0.000405719	0.0358098
ENSG00000175463	TBC1D10C	TBC1 domain family member 10C	20	69	3.402	1.767	0.000389822	0.0354819
ENSG00000175567	UCP2	uncoupling protein 2	201	371	1.849	0.887	6.91e-05	0.0152885
ENSG00000176153	GPX2	glutathione peroxidase 2	1629	2777	1.706	0.771	8.7e-05	0.0178909
ENSG00000176945	MUC20	mucin 20, cell surface associated	126	293	2.342	1.227	3.83e-05	0.0104586
ENSG00000176978	DPP7	dipeptidyl peptidase 7	11	36	3.397	1.764	0.000337085	0.0320198
ENSG00000177542	SLC25A22	solute carrier family 25 member 22	6	23	3.817	1.932	0.000450406	0.0367144
ENSG00000177666	PNPLA2	patatin like phospholipase domain containing 2	159	310	1.947	0.961	0.000693188	0.0449441
ENSG00000177830	CHID1	chitinase domain containing 1	217	347	1.602	0.68	6.22e-05	0.0141203
ENSG00000178209	PLEC	plectin	179	404	2.259	1.176	3.83e-05	0.0104586
ENSG00000178719	GRINA	glutamate ionotropic receptor NMDA type subunit associated protein 1	97	163	1.696	0.762	0.000464287	0.0367144
ENSG00000178927	C17orf62	chromosome 17 open reading frame 62	165	297	1.792	0.842	7.15e-05	0.0154251
ENSG00000178950	GAK	cyclin G associated kinase	454	638	1.4	0.486	0.000217044	0.026159
ENSG00000182162	P2RY8	purinergic receptor P2Y8	34	95	2.805	1.488	0.000254182	0.0288447
ENSG00000182240	BACE2	beta-site APP-cleaving enzyme 2	442	694	1.57	0.651	0.000117627	0.0202825
ENSG00000182866	LCK	LCK proto-oncogene, Src family tyrosine kinase	49	129	2.663	1.413	0.000268589	0.0291232
ENSG00000183010	PYCR1	pyrroline-5-carboxylate reductase 1	83	168	2.018	1.013	0.000242302	0.0282298
ENSG00000184363	PKP3	plakophilin 3	155	388	2.508	1.326	0.000194149	0.0253205
ENSG00000184730	APOBR	apolipoprotein B receptor	1928	3309	1.717	0.78	0.000418871	0.0362385
ENSG00000185499	MUC1	mucin 1, cell surface associated	1303	2310	1.774	0.827	0.000318333	0.0312539
ENSG00000186635	ARAP1	ArfGAP with RhoGAP domain, ankyrin repeat and PH domain 1	333	475	1.423	0.509	0.000710502	0.0453165
ENSG00000187837	HIST1H1C	histone cluster 1 H1 family member c	257	532	2.078	1.055	3.32e-05	0.010341
ENSG00000188373	C10orf99	chromosome 10 open reading frame 99	2679	4021	1.501	0.586	0.000182101	0.0246617
ENSG00000188833	ENTPD8	ectonucleoside triphosphate diphosphohydrolase 8	51	128	2.532	1.34	2.47e-05	0.00862022
ENSG00000196405	EVL	Enah/Vasp-like	191	382	1.997	0.998	0.000579059	0.0409433
ENSG00000196408	NOXO1	NADPH oxidase organizer 1	21	67	3.198	1.677	1.02e-06	0.00105066
ENSG00000196576	PLXNB2	plexin B2	321	568	1.77	0.824	0.000551015	0.0403538
ENSG00000197136	PCNX3	pecanex homolog 3	81	140	1.731	0.791	0.000534973	0.0396152
ENSG00000197249	SERPINA1	serpin family A member 1	953	1741	1.826	0.869	7.57e-08	0.000120344
ENSG00000198736	MSRB1	methionine sulfoxide reductase B1	91	170	1.87	0.903	0.000257998	0.0289881
ENSG00000198911	SREBF2	sterol regulatory element binding transcription factor 2	1390	2059	1.48	0.566	6.33e-08	0.000110553
ENSG00000198931	APRT	adenine phosphoribosyltransferase	105	199	1.915	0.937	0.00020081	0.0257161
ENSG00000204264	PSMB8	proteasome subunit beta 8	1079	1667	1.543	0.626	0.000147717	0.022653
ENSG00000204351	SKIV2L	Ski2 like RNA helicase	217	340	1.562	0.643	0.000692459	0.0449441
ENSG00000204385	SLC44A4	solute carrier family 44 member 4	5529	7869	1.423	0.509	6.19e-05	0.0141203
ENSG00000204642	HLA-F	major histocompatibility complex, class I, F	274	647	2.358	1.237	1.89e-05	0.00726421
ENSG00000204673	AKT1S1	AKT1 substrate 1	189	311	1.647	0.72	4.32e-05	0.0116056
ENSG00000204843	DCTN1	dynactin subunit 1	562	804	1.43	0.516	0.000475341	0.0374192
ENSG00000205220	PSMB10	proteasome subunit beta 10	60	147	2.49	1.316	5.91e-05	0.0140781
ENSG00000211598	IGKV4-1	immunoglobulin kappa variable 4-1	522	1168	2.241	1.164	0.000739738	0.0461702
ENSG00000211625	IGKV3D-20	immunoglobulin kappa variable 3D-20	25	80	3.218	1.686	0.00020399	0.0257161
ENSG00000211648	IGLV1-47	immunoglobulin lambda variable 1-47	57	185	3.237	1.695	0.000143347	0.0223672
ENSG00000211659	IGLV3-25	immunoglobulin lambda variable 3-25	110	316	2.868	1.52	6.02e-06	0.00400773
ENSG00000211660	IGLV2-23	immunoglobulin lambda variable 2-23	59	274	4.602	2.202	1.86e-05	0.00726421
ENSG00000211666	IGLV2-14	immunoglobulin lambda variable 2-14	109	550	5.07	2.342	6.52e-06	0.00406712
ENSG00000211668	IGLV2-11	immunoglobulin lambda variable 2-11	86	428	4.963	2.311	1.64e-05	0.00697417
ENSG00000211670	IGLV3-9	immunoglobulin lambda variable 3-9 (gene/pseudogene)	9	50	5.341	2.417	3.87e-06	0.00354648
ENSG00000211673	IGLV3-1	immunoglobulin lambda variable 3-1	131	483	3.687	1.882	0.000294697	0.0301177
ENSG00000211890	IGHA2	immunoglobulin heavy constant alpha 2 (A2m marker)	1514	5596	3.696	1.886	0.000366037	0.0341209
ENSG00000211897	IGHG3	immunoglobulin heavy constant gamma 3 (G3m marker)	22	150	6.999	2.807	0.000580412	0.0409433
ENSG00000211899	IGHM	immunoglobulin heavy constant mu	231	5063	21.908	4.453	1.04e-16	1.82e-12
ENSG00000211933	IGHV6-1	immunoglobulin heavy variable 6-1	36	150	4.175	2.062	0.000735777	0.0461702
ENSG00000211941	IGHV3-11	immunoglobulin heavy variable 3-11 (gene/pseudogene)	197	596	3.021	1.595	5.86e-06	0.00400773
ENSG00000211943	IGHV3-15	immunoglobulin heavy variable 3-15	466	1044	2.237	1.161	0.000121435	0.0206039
ENSG00000211947	IGHV3-21	immunoglobulin heavy variable 3-21	502	1213	2.415	1.272	0.000158151	0.0226929
ENSG00000211955	IGHV3-33	immunoglobulin heavy variable 3-33	55	124	2.244	1.166	0.000157998	0.0226929
ENSG00000211962	IGHV1-46	immunoglobulin heavy variable 1-46	71	208	2.931	1.551	0.000267246	0.0291232
ENSG00000214022	REPIN1	replication initiator 1	607	799	1.312	0.392	0.000648338	0.0435674
ENSG00000228474	OST4	oligosaccharyltransferase complex subunit 4, non-catalytic	858	1253	1.462	0.548	0.000514226	0.0389661
ENSG00000238121	LINC00426	long intergenic non-protein coding RNA 426	30	72	2.415	1.272	0.000156116	0.0226929
ENSG00000239951	IGKV3-20	immunoglobulin kappa variable 3-20	1124	2981	2.652	1.407	0.000856095	0.0494749
ENSG00000240065	PSMB9	proteasome subunit beta 9	167	356	2.132	1.093	8.3e-05	0.0172708
ENSG00000240864	IGKV1-16	immunoglobulin kappa variable 1-16	205	487	2.389	1.256	0.000403548	0.035799
ENSG00000241244	IGKV1D-16	immunoglobulin kappa variable 1D-16	13	54	3.927	1.973	0.000731468	0.0461702
ENSG00000241351	IGKV3-11	immunoglobulin kappa variable 3-11	705	1502	2.133	1.093	0.000447621	0.0367144
ENSG00000241755	IGKV1-9	immunoglobulin kappa variable 1-9	205	557	2.709	1.438	6.19e-06	0.00400773
ENSG00000242372	EIF6	eukaryotic translation initiation factor 6	600	1022	1.703	0.768	0.000760554	0.0468009
ENSG00000243238	IGKV2-30	immunoglobulin kappa variable 2-30	46	150	3.306	1.725	2.15e-05	0.0076757
ENSG00000243290	IGKV1-12	immunoglobulin kappa variable 1-12	194	464	2.384	1.254	0.000124139	0.0208403
ENSG00000243466	IGKV1-5	immunoglobulin kappa variable 1-5	667	1512	2.266	1.18	0.000199199	0.0257161
ENSG00000244734	HBB	hemoglobin subunit beta	51	181	3.583	1.841	1.42e-05	0.00654139
ENSG00000246174	KCTD21-AS1	KCTD21 antisense RNA 1	12	48	4.065	2.023	5.53e-05	0.0140154
ENSG00000251169	LINC01843	long intergenic non-protein coding RNA 1843	95	173	1.804	0.851	0.000206015	0.0257166
ENSG00000255856	AC069503.1		2	13	8.039	3.007	0.000273917	0.0291889
ENSG00000259674	AC092868.1		101	186	1.855	0.891	4.86e-05	0.0124941
ENSG00000270550	IGHV3-30	immunoglobulin heavy variable 3-30	73	192	2.617	1.388	0.00073715	0.0461702
ENSG00000271503	CCL5	C-C motif chemokine ligand 5	251	482	1.925	0.945	0.000844269	0.049346
ENSG00000275395	FCGBP	Fc fragment of IgG binding protein	13373	21954	1.642	0.715	0.000727524	0.0461702
ENSG00000278196	IGLV2-8	immunoglobulin lambda variable 2-8	25	95	3.863	1.95	0.000167888	0.0235183
ENSG00000003436	TFPI	tissue factor pathway inhibitor	256	168	0.66	-0.599	0.000271634	0.0291232
ENSG00000046653	GPM6B	glycoprotein M6B	87	42	0.479	-1.063	5.69e-05	0.0140781
ENSG00000046889	PREX2	phosphatidylinositol-3,4,5-trisphosphate dependent Rac exchange factor 2	130	69	0.53	-0.917	4.06e-06	0.00354648
ENSG00000071991	CDH19	cadherin 19	64	25	0.397	-1.334	3.67e-05	0.0104586
ENSG00000073712	FERMT2	fermitin family member 2	200	121	0.61	-0.714	0.000564356	0.0403854
ENSG00000111052	LIN7A	lin-7 homolog A, crumbs cell polarity complex component	52	14	0.275	-1.86	0.000810991	0.0485373
ENSG00000112175	BMP5	bone morphogenetic protein 5	541	304	0.562	-0.831	6.04e-05	0.0140781
ENSG00000115414	FN1	fibronectin 1	1527	892	0.585	-0.773	3.71e-05	0.0104586
ENSG00000115594	IL1R1	interleukin 1 receptor type 1	904	632	0.699	-0.516	0.000560882	0.0403854
ENSG00000123560	PLP1	proteolipid protein 1	170	89	0.525	-0.928	0.000125213	0.0208403
ENSG00000133110	POSTN	periostin	2271	1322	0.582	-0.78	0.000150599	0.022653
ENSG00000134028	ADAMDEC1	ADAM like decysin 1	10577	6550	0.619	-0.691	9.09e-05	0.0181745
ENSG00000135862	LAMC1	laminin subunit gamma 1	927	630	0.68	-0.556	0.000790623	0.0481039
ENSG00000136546	SCN7A	sodium voltage-gated channel alpha subunit 7	154	75	0.483	-1.051	4.45e-06	0.00370508
ENSG00000141338	ABCA8	ATP binding cassette subfamily A member 8	757	394	0.522	-0.938	0.000131204	0.0211849
ENSG00000144057	ST6GAL2	ST6 beta-galactoside alpha-2,6-sialyltransferase 2	61	22	0.363	-1.464	0.000477534	0.0374232
ENSG00000145147	SLIT2	slit guidance ligand 2	119	69	0.583	-0.779	0.00049569	0.0381616
ENSG00000147588	PMP2	peripheral myelin protein 2	21	7	0.344	-1.537	0.000204539	0.0257161
ENSG00000154188	ANGPT1	angiopoietin 1	69	35	0.51	-0.972	0.00055916	0.0403854
ENSG00000163637	PRICKLE2	prickle planar cell polarity protein 2	161	102	0.636	-0.653	0.000133345	0.0211849
ENSG00000164176	EDIL3	EGF like repeats and discoidin domains 3	2748	1765	0.643	-0.638	0.000260422	0.0289881
ENSG00000165072	MAMDC2	MAM domain containing 2	186	100	0.54	-0.889	0.00024794	0.0283202
ENSG00000166503	HDGFL3	HDGF like 3	193	105	0.544	-0.878	7.2e-07	0.000839389
ENSG00000170419	VSTM2A	V-set and transmembrane domain containing 2A	124	61	0.496	-1.012	9.88e-08	0.000143874
ENSG00000171408	PDE7B	phosphodiesterase 7B	109	68	0.624	-0.679	0.000517289	0.0389661
ENSG00000172260	NEGR1	neuronal growth regulator 1	278	147	0.533	-0.908	0.000201705	0.0257161
ENSG00000179915	NRXN1	neurexin 1	86	43	0.506	-0.982	0.000396951	0.035541
ENSG00000181409	AATK	apoptosis associated tyrosine kinase	32	6	0.195	-2.358	3.83e-05	0.0104586
ENSG00000184454	NCMAP	non-compact myelin associated protein	129	60	0.466	-1.101	0.000551874	0.0403538
ENSG00000184564	SLITRK6	SLIT and NTRK like family member 6	521	295	0.566	-0.821	8.79e-09	2.19e-05
ENSG00000189292	ALKAL2	ALK and LTK ligand 2	68	30	0.432	-1.21	0.000332794	0.0319652
ENSG00000234155	LINC02535	long intergenic non-protein coding RNA 2535	794	163	0.206	-2.281	8.09e-11	7.07e-07
ENSG00000235786	ZNRF3-IT1	ZNRF3 intronic transcript 1	16	1	0.089	-3.483	0.000281257	0.0294326
ENSG00000251562	MALAT1	metastasis associated lung adenocarcinoma transcript 1 (non-protein coding)	83650	44002	0.526	-0.927	0.000326561	0.0317055
ENSG00000266019	MIR3609	microRNA 3609	86	16	0.186	-2.425	1.01e-05	0.00503336

## Sheet: TI INR_vs_IR
Id	short_name	description	INR	IR	FoldChange	log2FoldChange	pvalue	padj
ENSG00000211648	IGLV1-47	immunoglobulin lambda variable 1-47	14	64	0.21875	-2.1926451	2.93E-06	0.10070234
ENSG00000135842	NIBAN1	niban apoptosis regulator 1	122	213	0.57276995	-0.8039723	4.98E-05	0.37139265
ENSG00000186188	FFAR4	free fatty acid receptor 4	28	58	0.48275862	-1.0506261	2.63E-05	0.37139265
ENSG00000260942	CAPN10-DT	CAPN10 divergent transcript	44	19	2.31578947	1.21150411	8.70E-05	0.46446847
ENSG00000177359	OVOS2	alpha-2-macroglobulin like 1 pseudogene	303	155	1.95483871	0.96704958	0.00013402	0.57612009
ENSG00000111341	MGP	matrix Gla protein	162	383	0.4229765	-1.2413506	0.00022726	0.60437878
ENSG00000129595	EPB41L4A	erythrocyte membrane protein band 4.1 like 4A	94	177	0.53107345	-0.9130167	0.00022846	0.60437878
ENSG00000168743	NPNT	nephronectin	1076	1868	0.57601713	-0.7958164	0.00021997	0.60437878
ENSG00000189157	FAM47E	family with sequence similarity 47 member E	134	81	1.65432099	0.72623919	0.0002125	0.60437878
ENSG00000269343	ZNF587B	zinc finger protein 587B	295	187	1.57754011	0.65767668	0.00019909	0.60437878
ENSG00000162836	ACP6	acid phosphatase 6, lysophosphatidic	206	130	1.58461538	0.66413271	0.0002881	0.63745836
ENSG00000239855	IGKV1-6	immunoglobulin kappa variable 1-6	9	46	0.19565217	-2.353637	0.00029657	0.63745836
ENSG00000211946	IGHV3-20	immunoglobulin heavy variable 3-20	2	21	0.0952381	-3.3923174	0.0003785	0.68511057
ENSG00000122378	PRXL2A	peroxiredoxin like 2A	2342	3164	0.74020228	-0.4340085	0.00045331	0.72766254
ENSG00000205362	MT1A	metallothionein 1A	14	45	0.31111111	-1.6844982	0.00046549	0.72766254
ENSG00000110799	VWF	von Willebrand factor	82	183	0.44808743	-1.1581478	0.00054777	0.78493722
ENSG00000135960	EDAR	ectodysplasin A receptor	13	39	0.33333333	-1.5849625	0.00052932	0.78493722
ENSG00000258643	BCL2L2-PABPN1	BCL2L2-PABPN1 readthrough	20	7	2.85714286	1.51457317	0.00063242	0.86998405

## Sheet: TI INR_vs_HC
Id	short_name	description	HC	INR	FoldChange	log2FoldChange	pvalue	padj
ENSG00000005844	ITGAL	integrin subunit alpha L	238	460	1.928	0.947	0.00102393	0.0476115
ENSG00000007312	CD79B	CD79b molecule	6	119	20.35	4.347	2.91e-05	0.0106009
ENSG00000011478	QPCTL	glutaminyl-peptide cyclotransferase like	41	100	2.462	1.3	3.89e-05	0.0117787
ENSG00000012124	CD22	CD22 molecule	35	426	12.145	3.602	0.000237775	0.0242076
ENSG00000012223	LTF	lactotransferrin	13	218	16.304	4.027	2.92e-05	0.0106009
ENSG00000049249	TNFRSF9	TNF receptor superfamily member 9	24	120	4.98	2.316	4.7e-05	0.0128883
ENSG00000049541	RFC2	replication factor C subunit 2	154	243	1.581	0.66	0.000363613	0.0288214
ENSG00000058335	RASGRF1	Ras protein specific guanine nucleotide releasing factor 1	5	30	6.149	2.62	0.000463808	0.03284
ENSG00000064300	NGFR	nerve growth factor receptor	7	22	2.961	1.566	0.000830917	0.0439822
ENSG00000068831	RASGRP2	RAS guanyl releasing protein 2	24	105	4.423	2.145	2.4e-06	0.00216299
ENSG00000069424	KCNAB2	potassium voltage-gated channel subfamily A regulatory beta subunit 2	29	59	2.071	1.051	0.000221429	0.0238591
ENSG00000100100	PIK3IP1	phosphoinositide-3-kinase interacting protein 1	245	368	1.5	0.585	0.00111089	0.049917
ENSG00000100721	TCL1A	T-cell leukemia/lymphoma 1A	1	103	122.64	6.938	0.000341804	0.0280932
ENSG00000101160	CTSZ	cathepsin Z	6082	11861	1.95	0.964	0.000126342	0.0194948
ENSG00000101294	HM13	histocompatibility minor 13	584	889	1.521	0.605	0.000228314	0.0242076
ENSG00000102007	PLP2	proteolipid protein 2	505	884	1.749	0.807	9.5e-05	0.017526
ENSG00000102575	ACP5	acid phosphatase 5, tartrate resistant	213	402	1.885	0.914	0.000140411	0.0203235
ENSG00000102962	CCL22	C-C motif chemokine ligand 22	20	79	3.898	1.963	0.000846942	0.0441165
ENSG00000104140	RHOV	ras homolog family member V	6	20	3.549	1.827	0.000652591	0.0396795
ENSG00000104814	MAP4K1	mitogen-activated protein kinase kinase kinase kinase 1	53	155	2.909	1.541	8.48e-05	0.0170552
ENSG00000104903	LYL1	LYL1, basic helix-loop-helix family member	6	26	4.529	2.179	0.000531683	0.03569
ENSG00000104921	FCER2	Fc fragment of IgE receptor II	6	68	10.821	3.436	0.000181224	0.0222865
ENSG00000105202	FBL	fibrillarin	1008	1602	1.589	0.668	3.78e-05	0.0117787
ENSG00000105369	CD79A	CD79a molecule	39	264	6.728	2.75	0.000102785	0.0181953
ENSG00000106683	LIMK1	LIM domain kinase 1	34	63	1.859	0.895	0.000652211	0.0396795
ENSG00000110107	PRPF19	pre-mRNA processing factor 19	824	1553	1.886	0.915	8.99e-07	0.00161891
ENSG00000110700	RPS13	ribosomal protein S13	4534	6778	1.495	0.58	0.000876099	0.0453465
ENSG00000111732	AICDA	activation induced cytidine deaminase	5	52	10.066	3.331	3.85e-05	0.0117787
ENSG00000112137	PHACTR1	phosphatase and actin regulator 1	39	114	2.915	1.544	0.000939703	0.0462945
ENSG00000112473	SLC39A7	solute carrier family 39 member 7	2190	3323	1.518	0.602	0.000133158	0.020166
ENSG00000112655	PTK7	protein tyrosine kinase 7 (inactive)	100	192	1.91	0.934	0.000276179	0.0249286
ENSG00000116132	PRRX1	paired related homeobox 1	7	61	8.313	3.055	0.000112497	0.0181953
ENSG00000116852	KIF21B	kinesin family member 21B	55	99	1.815	0.86	0.000410468	0.0312262
ENSG00000117215	PLA2G2D	phospholipase A2 group IID	5	106	23.223	4.537	0.000250856	0.0244226
ENSG00000117322	CR2	complement C3d receptor 2	111	1931	17.403	4.121	0.000210437	0.0235747
ENSG00000117362	APH1A	aph-1 homolog A, gamma-secretase subunit	1855	2873	1.549	0.631	0.000173113	0.0219491
ENSG00000120885	CLU	clusterin	155	660	4.257	2.09	9.44e-06	0.00532174
ENSG00000121966	CXCR4	C-X-C motif chemokine receptor 4	110	856	7.779	2.96	0.000476239	0.0330146
ENSG00000124243	BCAS4	breast carcinoma amplified sequence 4	40	146	3.638	1.863	0.000258072	0.0247326
ENSG00000125454	SLC25A19	solute carrier family 25 member 19	48	80	1.662	0.733	0.000962422	0.0468082
ENSG00000125730	C3	complement C3	110	903	8.228	3.041	0.000897427	0.0458697
ENSG00000126353	CCR7	C-C motif chemokine receptor 7	7	58	7.716	2.948	5.59e-05	0.0138497
ENSG00000127084	FGD3	FYVE, RhoGEF and PH domain containing 3	34	69	2.005	1.004	0.00030238	0.0258325
ENSG00000128218	VPREB3	V-set pre-B cell surrogate light chain 3	1	76	61.154	5.934	2.43e-05	0.00968482
ENSG00000130208	APOC1	apolipoprotein C1	16	53	3.338	1.739	0.000459765	0.0326953
ENSG00000130475	FCHO1	FCH domain only 1	11	34	3.112	1.638	0.000167865	0.0219491
ENSG00000131067	GGT7	gamma-glutamyltransferase 7	246	446	1.817	0.862	0.000278914	0.0249286
ENSG00000131401	NAPSB	napsin B aspartic peptidase, pseudogene	48	228	4.709	2.235	4.51e-05	0.0128883
ENSG00000131469	RPL27	ribosomal protein L27	3774	6696	1.774	0.827	0.000144886	0.0205223
ENSG00000132182	NUP210	nucleoporin 210	171	278	1.628	0.703	0.000287522	0.0251396
ENSG00000132185	FCRLA	Fc receptor like A	8	354	45.501	5.508	4.89e-06	0.00363841
ENSG00000132704	FCRL2	Fc receptor like 2	38	372	9.768	3.288	0.000451739	0.0325107
ENSG00000135446	CDK4	cyclin dependent kinase 4	235	376	1.599	0.677	0.000230218	0.0242076
ENSG00000136149	RPL13AP25	ribosomal protein L13a pseudogene 25	49	203	4.178	2.063	0.000400197	0.0307394
ENSG00000136573	BLK	BLK proto-oncogene, Src family tyrosine kinase	12	141	11.904	3.573	0.000758527	0.0417726
ENSG00000137054	POLR1E	RNA polymerase I subunit E	116	185	1.599	0.677	0.000478749	0.0330398
ENSG00000137078	SIT1	signaling threshold regulating transmembrane adaptor 1	29	98	3.364	1.75	0.000218133	0.0237852
ENSG00000137101	CD72	CD72 molecule	15	118	7.748	2.954	0.000556847	0.036286
ENSG00000137288	UQCC2	ubiquinol-cytochrome c reductase complex assembly factor 2	77	144	1.874	0.906	9.27e-05	0.017526
ENSG00000137970	RPL7P9	ribosomal protein L7 pseudogene 9	125	338	2.707	1.437	0.000624816	0.0387102
ENSG00000138031	ADCY3	adenylate cyclase 3	122	228	1.876	0.908	0.000545092	0.0359497
ENSG00000138074	SLC5A6	solute carrier family 5 member 6	281	416	1.485	0.57	0.00074958	0.0417726
ENSG00000138795	LEF1	lymphoid enhancer binding factor 1	23	62	2.699	1.432	0.000425755	0.0312858
ENSG00000139219	COL2A1	collagen type II alpha 1 chain	5	22	4.404	2.139	0.000139197	0.0203235
ENSG00000141524	TMC6	transmembrane channel like 6	66	131	1.989	0.992	0.00106288	0.0486962
ENSG00000142765	SYTL1	synaptotagmin like 1	27	67	2.491	1.317	0.000177739	0.0220234
ENSG00000142937	RPS8	ribosomal protein S8	3805	7026	1.847	0.885	0.000425934	0.0312858
ENSG00000143314	MRPL24	mitochondrial ribosomal protein L24	380	552	1.452	0.538	3.51e-05	0.0114681
ENSG00000145592	RPL37	ribosomal protein L37	6330	11119	1.756	0.813	0.000273991	0.0249286
ENSG00000149150	SLC43A1	solute carrier family 43 member 1	28	62	2.204	1.14	0.000171348	0.0219491
ENSG00000152128	TMEM163	transmembrane protein 163	4	37	9.885	3.305	0.000537122	0.0357121
ENSG00000153064	BANK1	B-cell scaffold protein with ankyrin repeats 1	30	393	12.942	3.694	0.000578731	0.0371205
ENSG00000153395	LPCAT1	lysophosphatidylcholine acyltransferase 1	171	364	2.127	1.089	0.000583582	0.0372854
ENSG00000153898	MCOLN2	mucolipin 2	46	146	3.192	1.674	0.000677231	0.0401595
ENSG00000154016	GRAP	GRB2-related adaptor protein	18	82	4.445	2.152	0.00098602	0.0470604
ENSG00000156234	CXCL13	C-X-C motif chemokine ligand 13	52	2368	45.335	5.503	0.000783202	0.0422569
ENSG00000156738	MS4A1	membrane spanning 4-domains A1	65	1416	21.879	4.451	0.0010512	0.0482962
ENSG00000157734	SNX22	sorting nexin 22	18	75	4.244	2.085	0.000422543	0.0312858
ENSG00000158517	NCF1	neutrophil cytosolic factor 1	30	72	2.412	1.27	0.000381436	0.0295676
ENSG00000159958	TNFRSF13C	TNF receptor superfamily member 13C	26	280	10.86	3.441	8.17e-05	0.0170552
ENSG00000160223	ICOSLG	inducible T-cell costimulator ligand	40	88	2.233	1.159	0.000288961	0.0251396
ENSG00000160856	FCRL3	Fc receptor like 3	18	336	18.374	4.2	0.000321189	0.0266669
ENSG00000161970	RPL26	ribosomal protein L26	1387	3089	2.227	1.155	2.1e-06	0.00214829
ENSG00000161981	SNRNP25	small nuclear ribonucleoprotein U11/U12 subunit 25	54	109	2.016	1.011	0.000815086	0.0434252
ENSG00000162267	ITIH3	inter-alpha-trypsin inhibitor heavy chain 3	3	47	14.879	3.895	4.03e-06	0.00313835
ENSG00000162734	PEA15	phosphoprotein enriched in astrocytes 15	756	1065	1.407	0.493	0.000608302	0.0382182
ENSG00000162897	FCAMR	Fc fragment of IgA and IgM receptor	9	121	13.648	3.771	0.000217229	0.0237852
ENSG00000163508	EOMES	eomesodermin	7	34	4.469	2.16	2.51e-06	0.00216299
ENSG00000163518	FCRL4	Fc receptor like 4	5	71	13.394	3.744	0.000268971	0.0249286
ENSG00000163568	AIM2	absent in melanoma 2	21	100	4.736	2.244	0.000675493	0.0401595
ENSG00000163931	TKT	transketolase	371	759	2.048	1.034	0.000194118	0.0225916
ENSG00000164088	PPM1M	protein phosphatase, Mg2+/Mn2+ dependent 1M	81	162	2.011	1.008	0.00016375	0.0217748
ENSG00000167074	TEF	TEF, PAR bZIP transcription factor	308	503	1.633	0.708	0.00096461	0.0468082
ENSG00000167483	FAM129C	family with sequence similarity 129 member C	7	289	44.165	5.465	0.000330614	0.0273107
ENSG00000167613	LAIR1	leukocyte associated immunoglobulin like receptor 1	199	275	1.378	0.462	0.000708731	0.0408169
ENSG00000168918	INPP5D	inositol polyphosphate-5-phosphatase D	198	428	2.158	1.11	0.00106718	0.0487563
ENSG00000170054	SERPINA9	serpin family A member 9	0	93	190.515	7.574	0.000749321	0.0417726
ENSG00000170786	SDR16C5	short chain dehydrogenase/reductase family 16C member 5	17	282	17.04	4.091	0.000914063	0.0459851
ENSG00000171960	PPIH	peptidylprolyl isomerase H	315	440	1.393	0.478	0.000916553	0.0459851
ENSG00000174123	TLR10	toll like receptor 10	32	312	9.667	3.273	0.000905602	0.0459851
ENSG00000177455	CD19	CD19 molecule	5	154	31.743	4.988	7.3e-05	0.0159241
ENSG00000178035	IMPDH2	inosine monophosphate dehydrogenase 2	550	835	1.519	0.603	0.000111706	0.0181953
ENSG00000179041	RRS1	ribosome biogenesis regulator homolog	49	117	2.416	1.273	2.46e-09	4.02e-05
ENSG00000180198	RCC1	regulator of chromosome condensation 1	295	494	1.673	0.743	0.00017264	0.0219491
ENSG00000180304	OAZ2	ornithine decarboxylase antizyme 2	1015	1373	1.353	0.436	2.08e-05	0.00929404
ENSG00000181617	FDCSP	follicular dendritic cell secreted protein	20	1514	76.143	6.251	0.000754206	0.0417726
ENSG00000182162	P2RY8	purinergic receptor P2Y8	22	114	5.212	2.382	9.59e-07	0.00161891
ENSG00000184293	CLECL1	C-type lectin like 1	13	67	5.329	2.414	0.00028085	0.0249651
ENSG00000184840	TMED9	transmembrane p24 trafficking protein 9	1104	1697	1.538	0.621	0.000532426	0.03569
ENSG00000185163	DDX51	DEAD-box helicase 51	101	165	1.637	0.711	0.000303337	0.0258325
ENSG00000185245	GP1BA	glycoprotein Ib platelet alpha subunit	2	27	11.284	3.496	3.16e-05	0.0112317
ENSG00000185565	LSAMP	limbic system-associated membrane protein	19	88	4.535	2.181	0.000348142	0.0281032
ENSG00000185641	AC034236.1		25	104	4.146	2.052	1.05e-06	0.00161891
ENSG00000185760	KCNQ5	potassium voltage-gated channel subfamily Q member 5	4	26	6.55	2.712	0.000775346	0.0421314
ENSG00000185989	RASA3	RAS p21 protein activator 3	70	125	1.782	0.833	0.000121736	0.0192065
ENSG00000186395	KRT10	keratin 10	148	282	1.902	0.927	5.53e-05	0.0138497
ENSG00000187912	CLEC17A	C-type lectin domain containing 17A	8	135	16.334	4.03	0.00010153	0.0181953
ENSG00000187994	RINL	Ras and Rab interactor like	62	148	2.39	1.257	7.1e-06	0.00446773
ENSG00000188488	SERPINA5	serpin family A member 5	3	28	8.991	3.168	0.000277894	0.0249286
ENSG00000188822	CNR2	cannabinoid receptor 2	6	149	23.109	4.53	0.000123299	0.0192065
ENSG00000189306	RRP7A	ribosomal RNA processing 7 homolog A	176	372	2.116	1.081	0.000998274	0.0470604
ENSG00000189343	AC004448.1		31	130	4.234	2.082	3.34e-05	0.0113978
ENSG00000196092	PAX5	paired box 5	10	302	29.778	4.896	0.00101655	0.0475579
ENSG00000197043	ANXA6	annexin A6	495	1148	2.317	1.213	1.09e-06	0.00161891
ENSG00000197756	RPL37A	ribosomal protein L37a	9834	14885	1.514	0.598	0.00102757	0.0476115
ENSG00000197905	TEAD4	TEA domain transcription factor 4	100	312	3.118	1.641	0.000536931	0.0357121
ENSG00000198106	AC025279.1		15	160	10.536	3.397	0.000194409	0.0225916
ENSG00000198796	ALPK2	alpha kinase 2	2	39	23.646	4.564	1.59e-06	0.00185933
ENSG00000198848	CES1	carboxylesterase 1	80	184	2.293	1.197	0.000744777	0.0417726
ENSG00000199753	SNORD104	small nucleolar RNA, C/D box 104	5	18	3.794	1.924	0.000210008	0.0235747
ENSG00000200795	RNU4-1	RNA, U4 small nuclear 1	6	28	5.345	2.418	0.000194755	0.0225916
ENSG00000204220	PFDN6	prefoldin subunit 6	592	898	1.517	0.601	0.000424068	0.0312858
ENSG00000204516	MICB	MHC class I polypeptide-related sequence B	45	99	2.243	1.166	0.00011347	0.0181953
ENSG00000204531	POU5F1	POU class 5 homeobox 1	92	261	2.839	1.505	0.000285892	0.0251396
ENSG00000204616	TRIM31	tripartite motif containing 31	814	1946	2.392	1.258	0.000895225	0.0458697
ENSG00000205542	TMSB4X	thymosin beta 4, X-linked	50169	74826	1.491	0.577	0.000244146	0.0242076
ENSG00000211897	IGHG3	immunoglobulin heavy constant gamma 3 (G3m marker)	9	74	8.294	3.052	0.000757275	0.0417726
ENSG00000211899	IGHM	immunoglobulin heavy constant mu	354	1094	3.092	1.629	0.000171034	0.0219491
ENSG00000212232	SNORD17	small nucleolar RNA, C/D box 17	35	97	2.735	1.451	0.000234786	0.0242076
ENSG00000212664	AC064799.1		5	29	5.561	2.475	0.000127708	0.0195214
ENSG00000212802	RPL15P3	ribosomal protein L15 pseudogene 3	23	71	3.167	1.663	0.000261084	0.0248273
ENSG00000213609	RPL7AP50	ribosomal protein L7a pseudogene 50	15	52	3.441	1.783	0.000112878	0.0181953
ENSG00000213967	ZNF726	zinc finger protein 726	8	37	4.358	2.124	0.000730072	0.0415239
ENSG00000214389	RPS3AP26	ribosomal protein S3a pseudogene 26	46	176	3.85	1.945	9.75e-09	7.98e-05
ENSG00000214535	RPS15AP1	ribosomal protein S15a pseudogene 1	11	37	3.253	1.702	0.00024511	0.0242076
ENSG00000226328	NUP50-AS1	NUP50 antisense RNA 1 (head to head)	27	61	2.233	1.159	0.000731161	0.0415239
ENSG00000226360	AC096919.1		13	66	5.144	2.363	1.71e-06	0.00185933
ENSG00000226950	DANCR	differentiation antagonizing non-protein coding RNA	124	210	1.691	0.758	9.12e-05	0.017526
ENSG00000226979	LTA	lymphotoxin alpha	5	23	4.924	2.3	0.000303791	0.0258325
ENSG00000227081	AC005912.1		171	664	3.877	1.955	2.23e-05	0.00953895
ENSG00000227615	AP001324.1		16	65	4.061	2.022	6.08e-05	0.0144009
ENSG00000229659	RPL26P6	ribosomal protein L26 pseudogene 6	12	36	3.082	1.624	0.000183562	0.0223869
ENSG00000230734	RPL10P3	ribosomal protein L10 pseudogene 3	10	35	3.412	1.771	0.000814476	0.0434252
ENSG00000231747	AC079922.1		8	30	3.621	1.856	0.000284752	0.0251396
ENSG00000232472	EEF1B2P3	eukaryotic translation elongation factor 1 beta 2 pseudogene 3	23	100	4.392	2.135	5.15e-05	0.0131519
ENSG00000232573	RPL3P4	ribosomal protein L3 pseudogene 4	103	390	3.762	1.911	0.000103019	0.0181953
ENSG00000233762	AC007969.1		21	72	3.457	1.79	0.000882322	0.0455245
ENSG00000234184	LINC01781	long intergenic non-protein coding RNA 1781	5	63	11.721	3.551	0.000682131	0.0401595
ENSG00000235314	LINC00957	long intergenic non-protein coding RNA 957	94	182	1.936	0.953	0.000358642	0.0286144
ENSG00000235552	AP005202.1		127	363	2.852	1.512	7e-06	0.00446773
ENSG00000235621	LINC00494	long intergenic non-protein coding RNA 494	4	26	7.615	2.929	0.000958563	0.0468008
ENSG00000237940	LINC01238	long intergenic non-protein coding RNA 1238	17	72	4.118	2.042	1.99e-05	0.00929404
ENSG00000238121	LINC00426	long intergenic non-protein coding RNA 426	26	96	3.643	1.865	0.000150535	0.0206904
ENSG00000239672	NME1	NME/NM23 nucleoside diphosphate kinase 1	42	94	2.24	1.164	0.000665702	0.0401595
ENSG00000240505	TNFRSF13B	TNF receptor superfamily member 13B	33	128	3.908	1.966	0.00108378	0.0492396
ENSG00000242125	SNHG3	small nucleolar RNA host gene 3	309	549	1.774	0.827	6.91e-07	0.00161446
ENSG00000242299	AC073861.1		7	28	3.885	1.958	0.000594027	0.0376586
ENSG00000244313	AC024293.1		24	85	3.525	1.818	8.4e-05	0.0170552
ENSG00000244398	AC116533.1		126	399	3.167	1.663	1.25e-06	0.00170623
ENSG00000246174	KCTD21-AS1	KCTD21 antisense RNA 1	5	24	4.891	2.29	0.000184778	0.0223869
ENSG00000247077	PGAM5	PGAM family member 5, mitochondrial serine/threonine protein phosphatase	198	289	1.458	0.544	0.000245629	0.0242076
ENSG00000251411	AC093827.3		13	34	2.655	1.409	5.78e-05	0.0141182
ENSG00000258017	AC011603.2		28	53	1.891	0.919	0.000656956	0.0397969
ENSG00000258232	AC125611.3		8	25	3.034	1.601	0.000239285	0.0242076
ENSG00000260942	CAPN10-AS1	CAPN10 antisense RNA 1 (head to head)	20	44	2.147	1.102	0.000238364	0.0242076
ENSG00000261786	AC006058.1		1	12	16.851	4.075	0.000455828	0.0325569
ENSG00000262445	AC099684.2		4	22	6.24	2.642	0.000376465	0.0293213
ENSG00000263266	RPS7P1	ribosomal protein S7 pseudogene 1	24	78	3.206	1.681	1.31e-07	0.00053725
ENSG00000263934	SNORD3A	small nucleolar RNA, C/D box 3A	91	382	4.19	2.067	2.33e-05	0.00953895
ENSG00000264920	AC018521.5		156	276	1.766	0.82	0.000426555	0.0312858
ENSG00000267121	AC008105.3		24	64	2.675	1.42	4.86e-05	0.0128883
ENSG00000269293	ZSCAN16-AS1	ZSCAN16 antisense RNA 1	53	97	1.817	0.861	0.000346554	0.0281032
ENSG00000272510	AL121992.3		26	53	2.077	1.055	7.66e-05	0.0162708
ENSG00000274736	CCL23	C-C motif chemokine ligand 23	2	81	33.697	5.075	0.000162343	0.0217646
ENSG00000275234	AC010503.4		813	1445	1.777	0.829	2.04e-05	0.00929404
ENSG00000278133	AC135050.6		395	568	1.439	0.525	0.000161168	0.0217646
ENSG00000279369	AC046185.3		4	17	4.339	2.117	0.000475468	0.0330146
ENSG00000279528	AC115618.3		90	166	1.835	0.876	8.55e-05	0.0170552
ENSG00000281398	SNHG4	small nucleolar RNA host gene 4	14	47	3.426	1.777	2.41e-06	0.00216299
ENSG00000283041	AC008038.1		73	288	3.981	1.993	2.06e-08	0.000112288
ENSG00000001561	ENPP4	ectonucleotide pyrophosphatase/phosphodiesterase 4 (putative)	794	532	0.669	-0.579	0.000619689	0.0386856
ENSG00000001629	ANKIB1	ankyrin repeat and IBR domain containing 1	1138	700	0.615	-0.7	0.000134577	0.0201939
ENSG00000005483	KMT2E	lysine methyltransferase 2E	1877	1268	0.676	-0.565	0.0010509	0.0482962
ENSG00000011198	ABHD5	abhydrolase domain containing 5	647	375	0.579	-0.787	0.000107125	0.0181953
ENSG00000012504	NR1H4	nuclear receptor subfamily 1 group H member 4	4721	2940	0.623	-0.683	2.68e-05	0.01018
ENSG00000024048	UBR2	ubiquitin protein ligase E3 component n-recognin 2	2363	1664	0.704	-0.505	0.000257263	0.0247326
ENSG00000028203	VEZT	vezatin, adherens junctions transmembrane protein	1164	838	0.72	-0.474	0.000476366	0.0330146
ENSG00000029364	SLC39A9	solute carrier family 39 member 9	2146	1538	0.717	-0.481	2.07e-05	0.00929404
ENSG00000034677	RNF19A	ring finger protein 19A, RBR E3 ubiquitin protein ligase	2103	1473	0.701	-0.513	0.000956955	0.0468008
ENSG00000046604	DSG2	desmoglein 2	7205	4474	0.621	-0.687	0.000453194	0.0325107
ENSG00000047365	ARAP2	ArfGAP with RhoGAP domain, ankyrin repeat and PH domain 2	1024	726	0.709	-0.496	0.00010803	0.0181953
ENSG00000054523	KIF1B	kinesin family member 1B	1723	1219	0.708	-0.499	0.000762478	0.0418493
ENSG00000054793	ATP9A	ATPase phospholipid transporting 9A (putative)	2238	1672	0.747	-0.42	0.000821191	0.0436085
ENSG00000054983	GALC	galactosylceramidase	1302	853	0.655	-0.61	0.000167655	0.0219491
ENSG00000060140	STYK1	serine/threonine/tyrosine kinase 1	548	330	0.603	-0.731	0.000934635	0.046184
ENSG00000066739	ATG2B	autophagy related 2B	1281	901	0.703	-0.508	0.000400311	0.0307394
ENSG00000067082	KLF6	Kruppel like factor 6	2832	1608	0.568	-0.817	1.56e-06	0.00185933
ENSG00000076321	KLHL20	kelch like family member 20	404	259	0.64	-0.643	0.000699002	0.0408169
ENSG00000081026	MAGI3	membrane associated guanylate kinase, WW and PDZ domain containing 3	1169	750	0.641	-0.641	0.000499988	0.0342167
ENSG00000081800	SLC13A1	solute carrier family 13 member 1	4561	2230	0.489	-1.032	2.1e-05	0.00929404
ENSG00000082996	RNF13	ring finger protein 13	1110	808	0.728	-0.458	0.000857069	0.0445023
ENSG00000085365	SCAMP1	secretory carrier membrane protein 1	754	535	0.71	-0.495	0.000192486	0.0225916
ENSG00000085449	WDFY1	WD repeat and FYVE domain containing 1	1192	816	0.684	-0.547	0.000105492	0.0181953
ENSG00000089902	RCOR1	REST corepressor 1	1113	770	0.692	-0.531	6.43e-05	0.0148019
ENSG00000091409	ITGA6	integrin subunit alpha 6	6326	4416	0.698	-0.519	0.00036476	0.0288214
ENSG00000100596	SPTLC2	serine palmitoyltransferase long chain base subunit 2	1857	1380	0.743	-0.429	0.0010119	0.0475579
ENSG00000100744	GSKIP	GSK3B interacting protein	2370	1472	0.622	-0.686	1.19e-05	0.00650998
ENSG00000101384	JAG1	jagged 1	981	747	0.762	-0.393	0.000702428	0.0408169
ENSG00000102081	FMR1	fragile X mental retardation 1	2077	1432	0.69	-0.536	3.3e-05	0.0113978
ENSG00000102189	EEA1	early endosome antigen 1	1032	642	0.622	-0.686	0.000245687	0.0242076
ENSG00000102471	NDFIP2	Nedd4 family interacting protein 2	3777	2612	0.692	-0.532	0.000944653	0.0463986
ENSG00000102554	KLF5	Kruppel like factor 5	9469	7407	0.782	-0.354	0.000137396	0.0203235
ENSG00000102921	N4BP1	NEDD4 binding protein 1	708	519	0.734	-0.447	0.000160377	0.0217646
ENSG00000104067	TJP1	tight junction protein 1	1561	1122	0.719	-0.476	6.3e-05	0.0147104
ENSG00000104231	ZFAND1	zinc finger AN1-type containing 1	672	466	0.692	-0.531	9.39e-05	0.017526
ENSG00000105835	NAMPT	nicotinamide phosphoribosyltransferase	2458	1431	0.582	-0.78	0.000112514	0.0181953
ENSG00000106524	ANKMY2	ankyrin repeat and MYND domain containing 2	680	497	0.73	-0.454	0.000442626	0.032176
ENSG00000107779	BMPR1A	bone morphogenetic protein receptor type 1A	1232	831	0.675	-0.567	3.43e-05	0.0114344
ENSG00000108582	CPD	carboxypeptidase D	3352	2028	0.605	-0.725	0.000301366	0.0258325
ENSG00000109586	GALNT7	polypeptide N-acetylgalactosaminyltransferase 7	3286	1880	0.572	-0.806	0.000585974	0.0372926
ENSG00000109787	KLF3	Kruppel like factor 3	3811	2394	0.628	-0.67	0.000233468	0.0242076
ENSG00000110344	UBE4A	ubiquitination factor E4A	2501	1742	0.696	-0.522	0.000408093	0.0311905
ENSG00000111816	FRK	fyn related Src family tyrosine kinase	3860	2276	0.59	-0.762	0.000555604	0.036286
ENSG00000111885	MAN1A1	mannosidase alpha class 1A member 1	7577	4604	0.608	-0.719	0.000248006	0.0242897
ENSG00000111897	SERINC1	serine incorporator 1	6669	4594	0.689	-0.538	0.000304823	0.0258325
ENSG00000112414	ADGRG6	adhesion G protein-coupled receptor G6	575	346	0.601	-0.734	0.000785407	0.0422569
ENSG00000112782	CLIC5	chloride intracellular channel 5	6939	4338	0.625	-0.678	0.000448865	0.0324851
ENSG00000112874	NUDT12	nudix hydrolase 12	1152	594	0.516	-0.954	0.000208492	0.0235747
ENSG00000113448	PDE4D	phosphodiesterase 4D	477	325	0.681	-0.555	0.000638559	0.0394123
ENSG00000113643	RARS	arginyl-tRNA synthetase	2106	1499	0.712	-0.49	6.01e-05	0.0144009
ENSG00000114127	XRN1	5'-3' exoribonuclease 1	2986	2142	0.717	-0.479	0.000905222	0.0459851
ENSG00000114166	KAT2B	lysine acetyltransferase 2B	1988	1256	0.632	-0.663	3.16e-06	0.00258642
ENSG00000115084	SLC35F5	solute carrier family 35 member F5	3202	1746	0.545	-0.875	4.98e-05	0.0129276
ENSG00000115963	RND3	Rho family GTPase 3	1499	1058	0.706	-0.502	0.000609864	0.0382182
ENSG00000116285	ERRFI1	ERBB receptor feedback inhibitor 1	784	451	0.575	-0.799	0.000560789	0.0363979
ENSG00000116833	NR5A2	nuclear receptor subfamily 5 group A member 2	2141	1308	0.611	-0.71	8.55e-05	0.0170552
ENSG00000117151	CTBS	chitobiase	632	419	0.664	-0.592	0.000148058	0.0205223
ENSG00000117475	BLZF1	basic leucine zipper nuclear factor 1	593	375	0.632	-0.662	0.000841564	0.0441165
ENSG00000117523	PRRC2C	proline rich coiled-coil 2C	3498	2646	0.757	-0.402	0.000771522	0.0420634
ENSG00000119636	BBOF1	basal body orientation factor 1	59	35	0.585	-0.774	0.000682584	0.0401595
ENSG00000119862	LGALSL	galectin like	1636	968	0.592	-0.756	2.6e-05	0.0101099
ENSG00000120925	RNF170	ring finger protein 170	907	706	0.779	-0.361	0.000576714	0.0371205
ENSG00000124019	FAM124B	family with sequence similarity 124 member B	14	4	0.247	-2.015	0.000258577	0.0247326
ENSG00000124171	PARD6B	par-6 family cell polarity regulator beta	847	609	0.719	-0.476	0.000245189	0.0242076
ENSG00000125304	TM9SF2	transmembrane 9 superfamily member 2	6775	4974	0.734	-0.446	0.000717429	0.0410289
ENSG00000127324	TSPAN8	tetraspanin 8	27527	19723	0.717	-0.481	4.89e-05	0.0128883
ENSG00000127334	DYRK2	dual specificity tyrosine phosphorylation regulated kinase 2	5546	3318	0.598	-0.741	0.000111888	0.0181953
ENSG00000129636	ITFG1	integrin alpha FG-GAP repeat containing 1	1586	1114	0.703	-0.509	0.000122743	0.0192065
ENSG00000130234	ACE2	angiotensin I converting enzyme 2	35942	20212	0.562	-0.83	2.32e-05	0.00953895
ENSG00000131724	IL13RA1	interleukin 13 receptor subunit alpha 1	6014	4091	0.68	-0.556	5.89e-07	0.00160561
ENSG00000131951	LRRC9	leucine rich repeat containing 9	20	5	0.254	-1.978	0.000751317	0.0417726
ENSG00000133731	IMPA1	inositol monophosphatase 1	1804	1256	0.697	-0.522	0.00102612	0.0476115
ENSG00000134444	KIAA1468	KIAA1468	1130	776	0.687	-0.542	0.000176329	0.0220234
ENSG00000134852	CLOCK	clock circadian regulator	1452	812	0.559	-0.84	0.000225055	0.0240589
ENSG00000135535	CD164	CD164 molecule	21766	14906	0.685	-0.546	4.27e-05	0.0124763
ENSG00000135837	CEP350	centrosomal protein 350	3237	2074	0.641	-0.642	0.000998408	0.0470604
ENSG00000136925	TSTD2	thiosulfate sulfurtransferase like domain containing 2	445	306	0.688	-0.539	0.000263203	0.0248841
ENSG00000137414	FAM8A1	family with sequence similarity 8 member A1	1681	1108	0.659	-0.602	7.46e-05	0.0160471
ENSG00000137752	CASP1	caspase 1	3088	2060	0.667	-0.584	0.000989397	0.0470604
ENSG00000137801	THBS1	thrombospondin 1	548	320	0.582	-0.78	0.000111093	0.0181953
ENSG00000137872	SEMA6D	semaphorin 6D	3620	2293	0.634	-0.658	9.54e-05	0.017526
ENSG00000138246	DNAJC13	DnaJ heat shock protein family (Hsp40) member C13	1500	976	0.651	-0.619	0.000350517	0.0281032
ENSG00000138434	SSFA2	sperm specific antigen 2	4645	3373	0.726	-0.462	0.000414623	0.0312858
ENSG00000138760	SCARB2	scavenger receptor class B member 2	8382	5504	0.657	-0.607	0.000778164	0.0421445
ENSG00000140386	SCAPER	S-phase cyclin A associated protein in the ER	889	640	0.72	-0.474	0.0010346	0.0478022
ENSG00000143079	CTTNBP2NL	CTTNBP2 N-terminal like	694	443	0.639	-0.647	4.75e-05	0.0128883
ENSG00000144136	SLC20A1	solute carrier family 20 member 1	1727	1127	0.653	-0.615	0.000912268	0.0459851
ENSG00000144426	NBEAL1	neurobeachin like 1	1258	706	0.561	-0.833	0.000425019	0.0312858
ENSG00000144820	ADGRG7	adhesion G protein-coupled receptor G7	3475	2118	0.61	-0.714	7.5e-06	0.00454466
ENSG00000145349	CAMK2D	calcium/calmodulin dependent protein kinase II delta	2076	1551	0.748	-0.42	0.000837909	0.044067
ENSG00000146587	RBAK	RB associated KRAB zinc finger	498	328	0.658	-0.604	0.000834138	0.0440102
ENSG00000149289	ZC3H12C	zinc finger CCCH-type containing 12C	658	342	0.52	-0.944	5.14e-06	0.00365667
ENSG00000149531	FRG1BP	FSHD region gene 1 family member B, pseudogene	233	124	0.536	-0.9	6.65e-05	0.0151067
ENSG00000150054	MPP7	membrane palmitoylated protein 7	622	360	0.578	-0.79	0.000670365	0.0401595
ENSG00000150776	C11orf57	chromosome 11 open reading frame 57	580	432	0.744	-0.426	0.00109814	0.0496165
ENSG00000151116	UEVLD	UEV and lactate/malate dehyrogenase domains	663	461	0.696	-0.523	0.00099516	0.0470604
ENSG00000151276	MAGI1	membrane associated guanylate kinase, WW and PDZ domain containing 1	1025	683	0.667	-0.585	0.00070519	0.0408169
ENSG00000151292	CSNK1G3	casein kinase 1 gamma 3	1256	889	0.708	-0.498	0.000350223	0.0281032
ENSG00000151779	NBAS	neuroblastoma amplified sequence	1476	933	0.632	-0.661	0.000969053	0.0468082
ENSG00000152078	TMEM56	transmembrane protein 56	2203	1492	0.677	-0.563	0.000424143	0.0312858
ENSG00000152332	UHMK1	U2AF homology motif kinase 1	5394	3582	0.664	-0.59	0.000429348	0.03135
ENSG00000152404	CWF19L2	CWF19 like 2, cell cycle control (S. pombe)	347	213	0.614	-0.703	0.000274944	0.0249286
ENSG00000154310	TNIK	TRAF2 and NCK interacting kinase	2647	1794	0.678	-0.561	2.08e-05	0.00929404
ENSG00000154639	CXADR	CXADR, Ig-like cell adhesion molecule	3398	2373	0.698	-0.518	0.000146033	0.0205223
ENSG00000155545	MIER3	MIER family member 3	2543	1644	0.646	-0.63	0.000977267	0.0470123
ENSG00000155846	PPARGC1B	PPARG coactivator 1 beta	792	516	0.652	-0.618	0.000204661	0.0234359
ENSG00000156671	SAMD8	sterile alpha motif domain containing 8	822	587	0.715	-0.484	0.000846918	0.0441165
ENSG00000157224	CLDN12	claudin 12	1510	1030	0.682	-0.552	0.000622403	0.0387073
ENSG00000159459	UBR1	ubiquitin protein ligase E3 component n-recognin 1	953	606	0.637	-0.652	0.000922588	0.0460057
ENSG00000162695	SLC30A7	solute carrier family 30 member 7	1092	840	0.769	-0.378	0.000678533	0.0401595
ENSG00000163251	FZD5	frizzled class receptor 5	2396	1455	0.608	-0.719	0.000191042	0.0225916
ENSG00000163291	PAQR3	progestin and adipoQ receptor family member 3	1173	695	0.593	-0.755	0.000748445	0.0417726
ENSG00000163694	RBM47	RNA binding motif protein 47	6855	4815	0.702	-0.51	0.000276023	0.0249286
ENSG00000163788	SNRK	SNF related kinase	1181	871	0.737	-0.44	0.000319776	0.0266669
ENSG00000164023	SGMS2	sphingomyelin synthase 2	2269	1362	0.601	-0.735	0.000487041	0.0334708
ENSG00000164099	PRSS12	protease, serine 12	436	282	0.646	-0.631	0.000606357	0.0382182
ENSG00000164124	TMEM144	transmembrane protein 144	1186	679	0.573	-0.804	0.000509508	0.034723
ENSG00000164164	OTUD4	OTU deubiquitinase 4	1334	956	0.717	-0.48	0.00110918	0.049917
ENSG00000164749	HNF4G	hepatocyte nuclear factor 4 gamma	14525	7570	0.521	-0.94	0.000144314	0.0205223
ENSG00000164983	TMEM65	transmembrane protein 65	589	388	0.659	-0.601	0.000896083	0.0458697
ENSG00000165929	TC2N	tandem C2 domains, nuclear	1076	629	0.585	-0.774	0.000711799	0.0408498
ENSG00000166200	COPS2	COP9 signalosome subunit 2	1366	884	0.647	-0.628	0.000909394	0.0459851
ENSG00000166225	FRS2	fibroblast growth factor receptor substrate 2	614	391	0.637	-0.651	0.00108795	0.0492924
ENSG00000166510	CCDC68	coiled-coil domain containing 68	1828	1303	0.713	-0.488	0.000266405	0.0249286
ENSG00000167562	ZNF701	zinc finger protein 701	320	227	0.708	-0.497	0.000563234	0.0364121
ENSG00000168143	FAM83B	family with sequence similarity 83 member B	438	190	0.436	-1.199	0.00099204	0.0470604
ENSG00000168216	LMBRD1	LMBR1 domain containing 1	2828	1989	0.703	-0.508	0.000176684	0.0220234
ENSG00000168769	TET2	tet methylcytosine dioxygenase 2	989	681	0.688	-0.539	9.15e-05	0.017526
ENSG00000169860	P2RY1	purinergic receptor P2Y1	1308	784	0.6	-0.738	0.00054961	0.0361021
ENSG00000170185	USP38	ubiquitin specific peptidase 38	967	670	0.693	-0.529	0.000743259	0.0417726
ENSG00000170385	SLC30A1	solute carrier family 30 member 1	3675	2018	0.549	-0.865	6.09e-06	0.00414721
ENSG00000170832	USP32	ubiquitin specific peptidase 32	408	230	0.564	-0.826	0.000920133	0.0460057
ENSG00000171365	CLCN5	chloride voltage-gated channel 5	1519	994	0.655	-0.61	9.22e-06	0.00532174
ENSG00000172296	SPTLC3	serine palmitoyltransferase long chain base subunit 3	605	340	0.562	-0.831	1.51e-05	0.00794136
ENSG00000173597	SULT1B1	sulfotransferase family 1B member 1	14403	7730	0.537	-0.898	0.000770393	0.0420634
ENSG00000174837	ADGRE1	adhesion G protein-coupled receptor E1	66	21	0.319	-1.649	0.000650097	0.0396795
ENSG00000176597	B3GNT5	UDP-GlcNAc:betaGal beta-1,3-N-acetylglucosaminyltransferase 5	2773	1715	0.618	-0.693	0.000230987	0.0242076
ENSG00000176771	NCKAP5	NCK associated protein 5	330	171	0.52	-0.943	3.93e-07	0.00128485
ENSG00000177707	NECTIN3	nectin cell adhesion molecule 3	1149	686	0.597	-0.745	0.000532126	0.03569
ENSG00000180628	PCGF5	polycomb group ring finger 5	3594	2476	0.689	-0.538	0.000368022	0.0289393
ENSG00000183354	KIAA2026	KIAA2026	572	375	0.656	-0.608	8.92e-05	0.017526
ENSG00000183530	PRR14L	proline rich 14 like	1393	943	0.677	-0.563	0.000799436	0.0428707
ENSG00000183742	MACC1	MACC1, MET transcriptional regulator	3062	1847	0.603	-0.729	0.00064539	0.0396795
ENSG00000184898	RBM43	RNA binding motif protein 43	393	209	0.533	-0.909	0.000221728	0.0238591
ENSG00000185716	C16orf52	chromosome 16 open reading frame 52	254	175	0.688	-0.539	0.000525587	0.0356701
ENSG00000186188	FFAR4	free fatty acid receptor 4	55	28	0.509	-0.975	6.97e-05	0.0156172
ENSG00000186814	ZSCAN30	zinc finger and SCAN domain containing 30	634	462	0.73	-0.455	0.000473897	0.0330146
ENSG00000187210	GCNT1	glucosaminyl (N-acetyl) transferase 1, core 2	3874	2070	0.534	-0.904	0.000139621	0.0203235
ENSG00000187546	AGMO	alkylglycerol monooxygenase	853	526	0.617	-0.697	0.000708047	0.0408169
ENSG00000187626	ZKSCAN4	zinc finger with KRAB and SCAN domains 4	121	78	0.647	-0.629	0.000186751	0.0224595
ENSG00000188611	ASAH2	N-acylsphingosine amidohydrolase 2	1312	355	0.27	-1.886	3.71e-05	0.0117787
ENSG00000188938	FAM120AOS	family with sequence similarity 120A opposite strand	711	543	0.765	-0.387	0.000204899	0.0234359
ENSG00000196549	MME	membrane metalloendopeptidase	35997	20982	0.583	-0.779	0.000217022	0.0237852
ENSG00000196639	HRH1	histamine receptor H1	657	431	0.656	-0.607	0.000316829	0.0265747
ENSG00000196792	STRN3	striatin 3	511	374	0.731	-0.453	0.000929637	0.046184
ENSG00000197619	ZNF615	zinc finger protein 615	190	114	0.604	-0.729	0.000374217	0.0292856
ENSG00000198142	SOWAHC	sosondowah ankyrin repeat domain family member C	551	358	0.649	-0.624	7.2e-05	0.0159115
ENSG00000198160	MIER1	MIER1 transcriptional regulator	1666	1128	0.677	-0.562	0.00021386	0.0237852
ENSG00000198168	SVIP	small VCP interacting protein	956	637	0.667	-0.584	0.000277998	0.0249286
ENSG00000198604	BAZ1A	bromodomain adjacent to zinc finger domain 1A	1240	864	0.696	-0.522	0.00108322	0.0492396
ENSG00000198689	SLC9A6	solute carrier family 9 member A6	1035	705	0.681	-0.553	0.000693399	0.0406496
ENSG00000204217	BMPR2	bone morphogenetic protein receptor type 2	1779	1292	0.726	-0.462	0.000934162	0.046184
ENSG00000204614	TRIM40	tripartite motif containing 40	344	188	0.55	-0.863	0.000541621	0.0358654
ENSG00000205213	LGR4	leucine rich repeat containing G protein-coupled receptor 4	3558	2252	0.633	-0.66	0.000269452	0.0249286
ENSG00000205358	MT1H	metallothionein 1H	636	202	0.318	-1.653	0.000313892	0.026464
ENSG00000205364	MT1M	metallothionein 1M	257	62	0.241	-2.054	0.000350304	0.0281032
ENSG00000213047	DENND1B	DENN domain containing 1B	1564	991	0.634	-0.658	0.00101768	0.0475579
ENSG00000233834	AC005083.1		476	298	0.627	-0.673	0.000995097	0.0470604
ENSG00000234155	LINC02535	long intergenic non-protein coding RNA 2535	1576	438	0.278	-1.846	4.05e-05	0.0120576
ENSG00000254685	FPGT	fucose-1-phosphate guanylyltransferase	533	342	0.642	-0.639	0.000475185	0.0330146
ENSG00000256043	CTSO	cathepsin O	1528	1073	0.702	-0.51	0.000147902	0.0205223
ENSG00000256683	ZNF350	zinc finger protein 350	338	248	0.731	-0.451	4.81e-05	0.0128883
ENSG00000271254	AC240274.1		524	263	0.503	-0.993	0.00067824	0.0401595
ENSG00000272405	AL365181.3		267	157	0.586	-0.771	0.000970163	0.0468082

## Sheet: TI IR_vs_HC
Id	short_name	description	HC	nonINR	FoldChange	log2FoldChange	pvalue	padj
ENSG00000004399	PLXND1	plexin D1	83	148	1.79	0.84	0.000373557	0.0173493
ENSG00000005513	SOX8	SRY-box 8	1	14	13.112	3.713	0.00149853	0.0345697
ENSG00000005844	ITGAL	integrin subunit alpha L	238	424	1.777	0.83	0.00230694	0.0430187
ENSG00000007080	CCDC124	coiled-coil domain containing 124	33	74	2.233	1.159	0.00165377	0.0363563
ENSG00000007312	CD79B	CD79b molecule	6	133	22.807	4.511	4.52e-06	0.00149525
ENSG00000010319	SEMA3G	semaphorin 3G	910	1715	1.883	0.913	0.000755388	0.0248095
ENSG00000010610	CD4	CD4 molecule	384	559	1.453	0.539	0.000100364	0.00853864
ENSG00000010671	BTK	Bruton tyrosine kinase	172	430	2.488	1.315	0.0025464	0.0453199
ENSG00000012124	CD22	CD22 molecule	35	511	14.568	3.865	2.92e-05	0.00408436
ENSG00000012223	LTF	lactotransferrin	13	147	11.03	3.463	0.000142866	0.0105734
ENSG00000012779	ALOX5	arachidonate 5-lipoxygenase	94	234	2.488	1.315	0.000465615	0.0192338
ENSG00000013016	EHD3	EH domain containing 3	21	52	2.491	1.317	0.000229895	0.0138244
ENSG00000013563	DNASE1L1	deoxyribonuclease 1 like 1	266	369	1.385	0.47	0.000789284	0.0251719
ENSG00000015285	WAS	Wiskott-Aldrich syndrome	45	108	2.391	1.257	0.00107582	0.029479
ENSG00000017483	SLC38A5	solute carrier family 38 member 5	37	75	2.016	1.012	0.00179665	0.0379174
ENSG00000021300	PLEKHB1	pleckstrin homology domain containing B1	113	159	1.404	0.489	0.000683195	0.0234755
ENSG00000023892	DEF6	DEF6, guanine nucleotide exchange factor	96	173	1.803	0.851	0.00141399	0.0333725
ENSG00000026025	VIM	vimentin	1499	2508	1.673	0.742	0.00169393	0.0366966
ENSG00000035720	STAP1	signal transducing adaptor family member 1	21	145	6.928	2.792	0.00128634	0.0317032
ENSG00000037241	RPL26L1	ribosomal protein L26 like 1	117	191	1.633	0.708	0.0008527	0.0261175
ENSG00000039523	RIPOR1	RHO family interacting cell polarization regulator 1	43	77	1.8	0.848	0.00154044	0.0350912
ENSG00000042493	CAPG	capping actin protein, gelsolin like	122	368	3.017	1.593	2.03e-07	0.000180344
ENSG00000049249	TNFRSF9	TNF receptor superfamily member 9	24	82	3.393	1.762	0.00109245	0.0296943
ENSG00000049540	ELN	elastin	11	28	2.467	1.303	0.00130327	0.0318629
ENSG00000053372	MRTO4	MRT4 homolog, ribosome maturation factor	230	362	1.572	0.653	0.00118425	0.030698
ENSG00000054967	RELT	RELT, TNF receptor	13	33	2.658	1.41	0.0013887	0.0330767
ENSG00000058335	RASGRF1	Ras protein specific guanine nucleotide releasing factor 1	5	28	5.765	2.527	0.000387319	0.0176216
ENSG00000064666	CNN2	calponin 2	139	349	2.512	1.329	6.15e-05	0.00657123
ENSG00000067225	PKM	pyruvate kinase, muscle	2453	3819	1.557	0.639	0.000289227	0.0154091
ENSG00000068001	HYAL2	hyaluronoglucosaminidase 2	13	33	2.594	1.375	0.00193239	0.0392622
ENSG00000068831	RASGRP2	RAS guanyl releasing protein 2	24	125	5.288	2.403	2.29e-08	6.24e-05
ENSG00000069424	KCNAB2	potassium voltage-gated channel subfamily A regulatory beta subunit 2	29	94	3.289	1.718	9.61e-11	4.64e-07
ENSG00000070190	DAPP1	dual adaptor of phosphotyrosine and 3-phosphoinositides 1	74	199	2.695	1.43	0.00270811	0.0465828
ENSG00000072110	ACTN1	actinin alpha 1	237	368	1.547	0.629	0.00124451	0.0314196
ENSG00000072694	FCGR2B	Fc fragment of IgG receptor IIb	17	108	6.55	2.712	0.00116304	0.0305832
ENSG00000072818	ACAP1	ArfGAP with coiled-coil, ankyrin repeat and PH domains 1	112	252	2.244	1.166	0.000367727	0.0172337
ENSG00000073536	NLE1	notchless homolog 1	23	41	1.753	0.809	0.00195362	0.0394975
ENSG00000073849	ST6GAL1	ST6 beta-galactoside alpha-2,6-sialyltransferase 1	262	569	2.172	1.119	0.000910687	0.0268283
ENSG00000074842	MYDGF	myeloid derived growth factor	256	455	1.781	0.833	0.000906526	0.0268122
ENSG00000075340	ADD2	adducin 2	2	16	8.648	3.112	0.000916576	0.0268665
ENSG00000075618	FSCN1	fascin actin-bundling protein 1	7	29	4.218	2.077	2.46e-06	0.00101972
ENSG00000076662	ICAM3	intercellular adhesion molecule 3	85	180	2.123	1.086	0.000465675	0.0192338
ENSG00000077549	CAPZB	capping actin protein of muscle Z-line beta subunit	2276	3234	1.421	0.507	0.000233463	0.0138885
ENSG00000079263	SP140	SP140 nuclear body protein	87	278	3.213	1.684	0.000435508	0.0186492
ENSG00000080644	CHRNA3	cholinergic receptor nicotinic alpha 3 subunit	2	15	6.957	2.799	0.00124041	0.0314059
ENSG00000081059	TCF7	transcription factor 7	150	331	2.21	1.144	7.27e-05	0.00700213
ENSG00000082781	ITGB5	integrin subunit beta 5	406	576	1.419	0.505	0.00284555	0.0482799
ENSG00000083454	P2RX5	purinergic receptor P2X 5	23	151	6.688	2.742	0.00149766	0.0345697
ENSG00000083845	RPS5	ribosomal protein S5	849	1989	2.344	1.229	1.58e-05	0.00286774
ENSG00000084623	EIF3I	eukaryotic translation initiation factor 3 subunit I	1487	2002	1.346	0.429	0.00065318	0.0228465
ENSG00000087460	GNAS	GNAS complex locus	2961	4146	1.4	0.486	0.000212649	0.0132914
ENSG00000089012	SIRPG	signal regulatory protein gamma	36	95	2.589	1.373	0.000158614	0.0111464
ENSG00000089327	FXYD5	FXYD domain containing ion transport regulator 5	94	246	2.611	1.385	2.88e-05	0.00406199
ENSG00000091592	NLRP1	NLR family pyrin domain containing 1	99	198	1.985	0.989	0.00134861	0.0324859
ENSG00000094755	GABRP	gamma-aminobutyric acid type A receptor pi subunit	27	81	3.035	1.602	8.13e-05	0.0076031
ENSG00000099284	H2AFY2	H2A histone family member Y2	93	136	1.469	0.555	0.000378617	0.0173493
ENSG00000099785	2002-03-01	membrane associated ring-CH-type finger 2	62	121	1.982	0.987	0.000164307	0.0113662
ENSG00000099901	RANBP1	RAN binding protein 1	184	286	1.556	0.638	0.00191239	0.0390375
ENSG00000099953	MMP11	matrix metallopeptidase 11	19	46	2.512	1.329	0.000725836	0.0243201
ENSG00000099956	SMARCB1	SWI/SNF related, matrix associated, actin dependent regulator of chromatin, subfamily b, member 1	178	391	2.204	1.14	4.42e-05	0.00518083
ENSG00000099958	DERL3	derlin 3	28	62	2.253	1.172	3.84e-05	0.00487342
ENSG00000100055	CYTH4	cytohesin 4	76	148	1.931	0.949	0.000852556	0.0261175
ENSG00000100097	LGALS1	galectin 1	176	422	2.398	1.262	4.21e-05	0.00509643
ENSG00000100100	PIK3IP1	phosphoinositide-3-kinase interacting protein 1	245	393	1.603	0.681	5.82e-05	0.00634376
ENSG00000100246	DNAL4	dynein axonemal light chain 4	68	116	1.723	0.785	0.00195726	0.0395221
ENSG00000100292	HMOX1	heme oxygenase 1	692	1421	2.054	1.038	0.00132946	0.032262
ENSG00000100297	MCM5	minichromosome maintenance complex component 5	90	191	2.141	1.098	7.17e-05	0.00697882
ENSG00000100321	SYNGR1	synaptogyrin 1	8	23	2.701	1.433	0.000903152	0.0268122
ENSG00000100450	GZMH	granzyme H	7	22	3.016	1.593	0.00127122	0.0315867
ENSG00000100604	CHGA	chromogranin A	1035	1637	1.582	0.662	0.00212954	0.041018
ENSG00000100628	ASB2	ankyrin repeat and SOCS box containing 2	55	105	1.891	0.919	0.00186114	0.038486
ENSG00000100721	TCL1A	T-cell leukemia/lymphoma 1A	1	85	102	6.672	0.000288904	0.0154091
ENSG00000100767	PAPLN	papilin, proteoglycan like sulfated glycoprotein	72	213	2.958	1.565	0.000605033	0.0219616
ENSG00000100979	PLTP	phospholipid transfer protein	65	131	2.005	1.004	0.00158095	0.0355306
ENSG00000101017	CD40	CD40 molecule	85	197	2.322	1.215	0.00100963	0.0283359
ENSG00000101144	BMP7	bone morphogenetic protein 7	15	42	2.803	1.487	0.00249637	0.0448386
ENSG00000101160	CTSZ	cathepsin Z	6082	10357	1.703	0.768	0.00119488	0.0308256
ENSG00000101194	SLC17A9	solute carrier family 17 member 9	6	23	4.13	2.046	6.32e-06	0.00181443
ENSG00000101265	RASSF2	Ras association domain family member 2	271	647	2.389	1.256	0.00204844	0.0399335
ENSG00000101294	HM13	histocompatibility minor 13	584	914	1.564	0.645	3.11e-05	0.00427391
ENSG00000101445	PPP1R16B	protein phosphatase 1 regulatory subunit 16B	201	444	2.209	1.144	0.00175956	0.0375126
ENSG00000102226	USP11	ubiquitin specific peptidase 11	115	181	1.576	0.656	0.000140288	0.0105508
ENSG00000102265	TIMP1	TIMP metallopeptidase inhibitor 1	98	252	2.574	1.364	9.72e-05	0.00836674
ENSG00000102575	ACP5	acid phosphatase 5, tartrate resistant	213	425	1.991	0.994	1.16e-05	0.00253256
ENSG00000102879	CORO1A	coronin 1A	110	393	3.557	1.831	1.32e-05	0.00268271
ENSG00000102962	CCL22	C-C motif chemokine ligand 22	20	166	8.195	3.035	4.22e-08	7.94e-05
ENSG00000103522	IL21R	interleukin 21 receptor	10	64	6.486	2.697	9.3e-06	0.00223745
ENSG00000104774	MAN2B1	mannosidase alpha class 2B member 1	220	384	1.743	0.802	8.59e-05	0.0079197
ENSG00000104783	KCNN4	potassium calcium-activated channel subfamily N member 4	13	52	4.076	2.027	0.000529129	0.0209093
ENSG00000104814	MAP4K1	mitogen-activated protein kinase kinase kinase kinase 1	53	159	2.991	1.58	1.99e-05	0.00318546
ENSG00000104894	CD37	CD37 molecule	137	679	4.965	2.312	0.000235211	0.0138885
ENSG00000104903	LYL1	LYL1, basic helix-loop-helix family member	6	29	5.083	2.346	8.62e-05	0.0079197
ENSG00000104921	FCER2	Fc fragment of IgE receptor II	6	107	17.041	4.091	2.42e-06	0.00101972
ENSG00000104998	IL27RA	interleukin 27 receptor subunit alpha	36	96	2.698	1.432	5.11e-06	0.00155228
ENSG00000105193	RPS16	ribosomal protein S16	1144	2124	1.857	0.893	0.00139037	0.0330767
ENSG00000105202	FBL	fibrillarin	1008	1535	1.523	0.607	7.28e-05	0.00700213
ENSG00000105270	CLIP3	CAP-Gly domain containing linker protein 3	33	66	1.99	0.993	0.00210157	0.0406784
ENSG00000105329	TGFB1	transforming growth factor beta 1	48	97	2.011	1.008	0.000547937	0.0210377
ENSG00000105369	CD79A	CD79a molecule	39	363	9.264	3.212	1.53e-06	0.000817335
ENSG00000105472	CLEC11A	C-type lectin domain containing 11A	41	93	2.274	1.185	0.00207137	0.0401888
ENSG00000105612	DNASE2	deoxyribonuclease 2, lysosomal	152	312	2.058	1.041	0.00196965	0.0395828
ENSG00000105639	JAK3	Janus kinase 3	163	475	2.913	1.543	0.00088051	0.0265712
ENSG00000105640	RPL18A	ribosomal protein L18a	848	1688	1.992	0.994	0.0021386	0.0410551
ENSG00000106123	EPHB6	EPH receptor B6	3	15	5.218	2.383	0.000226139	0.0137371
ENSG00000106348	IMPDH1	inosine monophosphate dehydrogenase 1	20	48	2.434	1.283	2.99e-06	0.00113543
ENSG00000106624	AEBP1	AE binding protein 1	144	282	1.953	0.965	0.00299126	0.0495695
ENSG00000106628	POLD2	DNA polymerase delta 2, accessory subunit	83	152	1.828	0.87	0.000155906	0.011103
ENSG00000106683	LIMK1	LIM domain kinase 1	34	69	2.04	1.028	3.43e-05	0.00452762
ENSG00000106948	AKNA	AT-hook transcription factor	246	426	1.736	0.796	0.000261455	0.0149523
ENSG00000106991	ENG	endoglin	75	164	2.162	1.112	0.00128032	0.0316807
ENSG00000107742	SPOCK2	SPARC/osteonectin, cwcv and kazal like domains proteoglycan 2	151	342	2.256	1.173	1.18e-05	0.00253341
ENSG00000107833	NPM3	nucleophosmin/nucleoplasmin 3	36	82	2.268	1.181	0.000164603	0.0113662
ENSG00000108298	RPL19	ribosomal protein L19	3958	6688	1.69	0.757	0.00128641	0.0317032
ENSG00000108622	ICAM2	intercellular adhesion molecule 2	25	99	3.902	1.964	4.37e-08	7.94e-05
ENSG00000108774	RAB5C	RAB5C, member RAS oncogene family	550	1045	1.901	0.927	0.000279568	0.0152421
ENSG00000110104	CCDC86	coiled-coil domain containing 86	22	37	1.685	0.753	0.00256966	0.0454863
ENSG00000110107	PRPF19	pre-mRNA processing factor 19	824	1418	1.724	0.785	7.96e-06	0.00211136
ENSG00000110448	CD5	CD5 molecule	23	52	2.179	1.124	0.00150581	0.0346888
ENSG00000110651	CD81	CD81 molecule	235	433	1.842	0.881	0.00184728	0.038486
ENSG00000110665	C11orf21	chromosome 11 open reading frame 21	5	19	4.386	2.133	0.00124873	0.0314196
ENSG00000110777	POU2AF1	POU class 2 associating factor 1	213	900	4.214	2.075	0.00215408	0.0412072
ENSG00000111341	MGP	matrix Gla protein	196	383	1.956	0.968	0.00214486	0.0410788
ENSG00000111348	ARHGDIB	Rho GDP dissociation inhibitor beta	1069	2257	2.112	1.078	0.0011534	0.0303785
ENSG00000111679	PTPN6	protein tyrosine phosphatase, non-receptor type 6	239	488	2.043	1.031	0.00122457	0.0311915
ENSG00000111728	ST8SIA1	ST8 alpha-N-acetyl-neuraminide alpha-2,8-sialyltransferase 1	23	56	2.448	1.291	0.00194604	0.0393929
ENSG00000111732	AICDA	activation induced cytidine deaminase	5	34	6.557	2.713	0.000435293	0.0186492
ENSG00000111913	RIPOR2	RHO family interacting cell polarization regulator 2	69	363	5.256	2.394	0.00122377	0.0311915
ENSG00000112110	MRPL18	mitochondrial ribosomal protein L18	270	369	1.369	0.453	0.00261324	0.0460169
ENSG00000112137	PHACTR1	phosphatase and actin regulator 1	39	133	3.379	1.757	6.66e-05	0.00672687
ENSG00000112149	CD83	CD83 molecule	47	242	5.106	2.352	0.00258397	0.0456407
ENSG00000112195	TREML2	triggering receptor expressed on myeloid cells like 2	3	19	6.468	2.693	0.000161948	0.0113198
ENSG00000112303	VNN2	vanin 2	41	119	2.875	1.523	0.0027959	0.0477346
ENSG00000112306	RPS12	ribosomal protein S12	5306	9386	1.769	0.823	0.000206241	0.013146
ENSG00000112473	SLC39A7	solute carrier family 39 member 7	2190	3079	1.406	0.492	0.000933249	0.0270163
ENSG00000112561	TFEB	transcription factor EB	37	83	2.276	1.186	0.000728593	0.0243201
ENSG00000112799	LY86	lymphocyte antigen 86	54	154	2.861	1.517	0.000125409	0.0098615
ENSG00000113140	SPARC	secreted protein acidic and cysteine rich	1450	2137	1.473	0.559	0.00149838	0.0345697
ENSG00000114353	GNAI2	G protein subunit alpha i2	420	718	1.708	0.772	1.7e-05	0.0028953
ENSG00000114942	EEF1B2	eukaryotic translation elongation factor 1 beta 2	5909	7926	1.341	0.424	0.00128934	0.031712
ENSG00000115457	IGFBP2	insulin like growth factor binding protein 2	37	107	2.888	1.53	0.000270316	0.0150127
ENSG00000116132	PRRX1	paired related homeobox 1	7	44	6.029	2.592	0.00056299	0.0212044
ENSG00000116649	SRM	spermidine synthase	18	48	2.747	1.458	0.000330943	0.0163316
ENSG00000116852	KIF21B	kinesin family member 21B	55	88	1.614	0.69	0.00294413	0.0492374
ENSG00000117122	MFAP2	microfibril associated protein 2	5	15	2.8	1.485	0.000885703	0.0266787
ENSG00000117215	PLA2G2D	phospholipase A2 group IID	5	128	27.904	4.802	4.18e-05	0.00509643
ENSG00000117322	CR2	complement C3d receptor 2	111	1029	9.278	3.214	0.00217917	0.0414447
ENSG00000117362	APH1A	aph-1 homolog A, gamma-secretase subunit	1855	2815	1.518	0.602	0.000147258	0.0108006
ENSG00000117385	P3H1	prolyl 3-hydroxylase 1	68	104	1.525	0.609	0.000737692	0.0243722
ENSG00000117394	SLC2A1	solute carrier family 2 member 1	50	107	2.131	1.092	0.00111618	0.029802
ENSG00000118432	CNR1	cannabinoid receptor 1	11	109	10.291	3.363	0.00266853	0.0461867
ENSG00000118707	TGIF2	TGFB induced factor homeobox 2	72	149	2.083	1.059	0.00212838	0.041018
ENSG00000119403	PHF19	PHD finger protein 19	80	144	1.811	0.857	0.000225298	0.0137371
ENSG00000120254	MTHFD1L	methylenetetrahydrofolate dehydrogenase (NADP+ dependent) 1 like	44	74	1.665	0.735	0.00264017	0.0460169
ENSG00000120659	TNFSF11	TNF superfamily member 11	8	85	11.11	3.474	0.000814333	0.0254859
ENSG00000120885	CLU	clusterin	155	671	4.326	2.113	2.06e-06	0.00101972
ENSG00000121966	CXCR4	C-X-C motif chemokine receptor 4	110	665	6.052	2.598	0.00115019	0.0303427
ENSG00000122122	SASH3	SAM and SH3 domain containing 3	181	445	2.458	1.297	0.00055308	0.0211359
ENSG00000122574	WIPF3	WAS/WASL interacting protein family member 3	41	107	2.587	1.371	0.00166956	0.0364583
ENSG00000122711	SPINK4	serine peptidase inhibitor, Kazal type 4	4451	8797	1.977	0.983	0.00104542	0.0289811
ENSG00000122986	HVCN1	hydrogen voltage gated channel 1	47	139	2.936	1.554	0.000596066	0.0218104
ENSG00000123095	BHLHE41	basic helix-loop-helix family member e41	73	176	2.423	1.277	0.00171458	0.0368996
ENSG00000123329	ARHGAP9	Rho GTPase activating protein 9	132	241	1.816	0.861	0.00287544	0.0485854
ENSG00000123416	TUBA1B	tubulin alpha 1b	2531	3940	1.557	0.639	0.00127145	0.0315867
ENSG00000124126	PREX1	phosphatidylinositol-3,4,5-trisphosphate dependent Rac exchange factor 1	109	214	1.968	0.976	8.95e-05	0.00803934
ENSG00000124228	DDX27	DEAD-box helicase 27	585	730	1.25	0.322	0.00112122	0.029802
ENSG00000124243	BCAS4	breast carcinoma amplified sequence 4	40	136	3.377	1.756	0.000269741	0.0150127
ENSG00000124772	CPNE5	copine 5	28	92	3.255	1.703	0.000764964	0.0249238
ENSG00000125354	2006-09-01	septin 6	228	462	2.026	1.019	0.00204657	0.0399335
ENSG00000125730	C3	complement C3	110	1363	12.421	3.635	2.55e-05	0.00386774
ENSG00000125746	EML2	echinoderm microtubule associated protein like 2	192	359	1.87	0.903	0.00140719	0.0332602
ENSG00000126264	HCST	hematopoietic cell signal transducer	79	121	1.515	0.599	0.00186763	0.0385208
ENSG00000126353	CCR7	C-C motif chemokine receptor 7	7	91	12.252	3.615	1.73e-07	0.000166093
ENSG00000126882	FAM78A	family with sequence similarity 78 member A	56	107	1.904	0.929	0.00252714	0.0451191
ENSG00000127084	FGD3	FYVE, RhoGEF and PH domain containing 3	34	81	2.354	1.235	2.45e-06	0.00101972
ENSG00000127824	TUBA4A	tubulin alpha 4a	350	585	1.676	0.745	0.000557374	0.0212009
ENSG00000128218	VPREB3	V-set pre-B cell surrogate light chain 3	1	93	74.802	6.225	3.27e-06	0.00121568
ENSG00000128228	SDF2L1	stromal cell derived factor 2 like 1	40	101	2.564	1.359	0.00184067	0.0384495
ENSG00000128340	RAC2	ras-related C3 botulinum toxin substrate 2 (rho family, small GTP binding protein Rac2)	206	564	2.731	1.449	0.000816365	0.0254859
ENSG00000128438	TBC1D27	TBC1 domain family member 27	5	30	6.23	2.639	0.000142485	0.0105734
ENSG00000128815	WDFY4	WDFY family member 4	62	196	3.168	1.664	0.000272214	0.0150127
ENSG00000129009	ISLR	immunoglobulin superfamily containing leucine rich repeat	52	101	1.948	0.962	0.0015223	0.0349211
ENSG00000129538	RNASE1	ribonuclease A family member 1, pancreatic	953	3227	3.386	1.759	9.83e-07	0.000642912
ENSG00000129562	DAD1	defender against cell death 1	1505	2198	1.46	0.546	9.16e-05	0.00817394
ENSG00000129667	RHBDF2	rhomboid 5 homolog 2	18	49	2.7	1.433	8.83e-05	0.00801323
ENSG00000130203	APOE	apolipoprotein E	31	85	2.768	1.469	2.36e-05	0.00364737
ENSG00000130475	FCHO1	FCH domain only 1	11	26	2.395	1.26	0.00265399	0.0460949
ENSG00000130592	LSP1	lymphocyte-specific protein 1	85	197	2.32	1.214	0.000432082	0.0186468
ENSG00000131116	ZNF428	zinc finger protein 428	36	71	1.955	0.967	0.000803643	0.0253894
ENSG00000131196	NFATC1	nuclear factor of activated T-cells 1	22	69	3.105	1.635	0.001629	0.0360052
ENSG00000131398	KCNC3	potassium voltage-gated channel subfamily C member 3	15	35	2.367	1.243	0.00274624	0.0471328
ENSG00000131401	NAPSB	napsin B aspartic peptidase, pseudogene	48	249	5.147	2.364	4.89e-06	0.00153764
ENSG00000131469	RPL27	ribosomal protein L27	3774	6780	1.796	0.845	3.83e-05	0.00487342
ENSG00000132182	NUP210	nucleoporin 210	171	253	1.481	0.567	0.00203358	0.0399248
ENSG00000132185	FCRLA	Fc receptor like A	8	333	42.789	5.419	1.95e-06	0.00099809
ENSG00000132704	FCRL2	Fc receptor like 2	38	337	8.839	3.144	0.000378391	0.0173493
ENSG00000132768	DPH2	DPH2 homolog	59	90	1.548	0.631	0.00216744	0.0412981
ENSG00000132819	RBM38	RNA binding motif protein 38	26	86	3.311	1.727	8.29e-06	0.00212711
ENSG00000133275	CSNK1G2	casein kinase 1 gamma 2	33	72	2.174	1.121	0.00149839	0.0345697
ENSG00000134013	LOXL2	lysyl oxidase like 2	92	163	1.775	0.828	0.000102448	0.00859168
ENSG00000135439	AGAP2	ArfGAP with GTPase domain, ankyrin repeat and PH domain 2	41	86	2.111	1.078	0.000221742	0.0136861
ENSG00000135919	SERPINE2	serpin family E member 2	201	491	2.442	1.288	0.00199986	0.0398412
ENSG00000136280	CCM2	CCM2 scaffolding protein	89	156	1.749	0.807	0.000389432	0.0176442
ENSG00000136490	LIMD2	LIM domain containing 2	21	81	3.951	1.982	0.000194308	0.0126115
ENSG00000136573	BLK	BLK proto-oncogene, Src family tyrosine kinase	12	146	12.272	3.617	0.000306857	0.0157334
ENSG00000136732	GYPC	glycophorin C (Gerbich blood group)	40	104	2.605	1.381	2.65e-05	0.00394563
ENSG00000136997	MYC	MYC proto-oncogene, bHLH transcription factor	62	134	2.145	1.101	0.000240753	0.0140634
ENSG00000137076	TLN1	talin 1	952	1334	1.402	0.487	0.00186751	0.0385208
ENSG00000137077	CCL21	C-C motif chemokine ligand 21	67	550	8.253	3.045	2.63e-09	8.61e-06
ENSG00000137078	SIT1	signaling threshold regulating transmembrane adaptor 1	29	106	3.679	1.879	2.66e-05	0.00394563
ENSG00000137101	CD72	CD72 molecule	15	124	8.158	3.028	0.000179589	0.0119405
ENSG00000137288	UQCC2	ubiquinol-cytochrome c reductase complex assembly factor 2	77	130	1.704	0.769	0.000483762	0.019781
ENSG00000138623	SEMA7A	semaphorin 7A (John Milton Hagen blood group)	29	119	4.068	2.024	3.03e-05	0.00420561
ENSG00000138795	LEF1	lymphoid enhancer binding factor 1	23	88	3.871	1.953	3.31e-07	0.000270805
ENSG00000138964	PARVG	parvin gamma	104	202	1.944	0.959	0.000269745	0.0150127
ENSG00000139193	CD27	CD27 molecule	22	75	3.425	1.776	0.000326541	0.0162505
ENSG00000139194	RBP5	retinol binding protein 5	44	100	2.244	1.166	0.00132052	0.0321346
ENSG00000139626	ITGB7	integrin subunit beta 7	191	302	1.577	0.657	0.000552763	0.0211359
ENSG00000139641	ESYT1	extended synaptotagmin 1	337	469	1.388	0.473	0.000438024	0.0187058
ENSG00000140279	DUOX2	dual oxidase 2	5	28	5.071	2.342	0.00171357	0.0368996
ENSG00000140545	MFGE8	milk fat globule-EGF factor 8 protein	64	159	2.463	1.301	6.63e-06	0.00186256
ENSG00000141524	TMC6	transmembrane channel like 6	66	131	1.995	0.997	0.000507307	0.0204372
ENSG00000141968	VAV1	vav guanine nucleotide exchange factor 1	69	144	2.078	1.055	0.00107599	0.029479
ENSG00000142227	EMP3	epithelial membrane protein 3	139	268	1.926	0.946	0.000239662	0.0140499
ENSG00000142507	PSMB6	proteasome subunit beta 6	423	721	1.703	0.768	0.00302881	0.0499891
ENSG00000142765	SYTL1	synaptotagmin like 1	27	73	2.738	1.453	1.23e-05	0.00260653
ENSG00000142937	RPS8	ribosomal protein S8	3805	7918	2.081	1.057	8e-06	0.00211136
ENSG00000143196	DPT	dermatopontin	59	154	2.588	1.372	0.00124528	0.0314196
ENSG00000143314	MRPL24	mitochondrial ribosomal protein L24	380	540	1.419	0.505	3.99e-05	0.00501717
ENSG00000143494	VASH2	vasohibin 2	12	32	2.656	1.409	0.00135953	0.0326049
ENSG00000143772	ITPKB	inositol-trisphosphate 3-kinase B	99	169	1.702	0.768	0.00272194	0.0467648
ENSG00000143869	GDF7	growth differentiation factor 7	9	34	3.873	1.954	0.000680721	0.0234397
ENSG00000145592	RPL37	ribosomal protein L37	6330	10621	1.678	0.747	0.000392177	0.0176706
ENSG00000146112	PPP1R18	protein phosphatase 1 regulatory subunit 18	157	386	2.467	1.303	0.000112786	0.00922366
ENSG00000146374	RSPO3	R-spondin 3	8	27	3.26	1.705	0.000711118	0.0239322
ENSG00000146535	GNA12	G protein subunit alpha 12	149	221	1.481	0.567	0.00101639	0.0283687
ENSG00000147065	MSN	moesin	1092	1784	1.633	0.708	0.000748469	0.0246317
ENSG00000148053	NTRK2	neurotrophic receptor tyrosine kinase 2	3	21	6.857	2.778	0.000206562	0.013146
ENSG00000148303	RPL7A	ribosomal protein L7a	11170	16038	1.436	0.522	0.000100756	0.00853864
ENSG00000149150	SLC43A1	solute carrier family 43 member 1	28	51	1.824	0.867	0.00286323	0.0484292
ENSG00000149257	SERPINH1	serpin family H member 1	336	591	1.757	0.813	0.00125248	0.0314196
ENSG00000149273	RPS3	ribosomal protein S3	14422	22326	1.548	0.63	0.000642553	0.0226013
ENSG00000149485	FADS1	fatty acid desaturase 1	62	113	1.823	0.866	0.000252273	0.0145801
ENSG00000150977	RILPL2	Rab interacting lysosomal protein like 2	76	155	2.053	1.038	0.00117426	0.030698
ENSG00000151468	CCDC3	coiled-coil domain containing 3	23	53	2.278	1.188	0.00077307	0.025088
ENSG00000151651	ADAM8	ADAM metallopeptidase domain 8	14	41	2.886	1.529	0.000171138	0.0114719
ENSG00000152137	HSPB8	heat shock protein family B (small) member 8	10	34	3.519	1.815	0.0011843	0.030698
ENSG00000153064	BANK1	B-cell scaffold protein with ankyrin repeats 1	30	455	14.986	3.906	0.000114834	0.00929815
ENSG00000154016	GRAP	GRB2-related adaptor protein	18	94	5.096	2.349	0.000140625	0.0105508
ENSG00000154096	THY1	Thy-1 cell surface antigen	45	123	2.747	1.458	7.52e-05	0.00716841
ENSG00000155511	GRIA1	glutamate ionotropic receptor AMPA type subunit 1	5	19	3.753	1.908	0.000777538	0.0251332
ENSG00000156127	BATF	basic leucine zipper ATF-like transcription factor	4	17	4.174	2.061	0.000342875	0.0167391
ENSG00000156234	CXCL13	C-X-C motif chemokine ligand 13	52	1587	30.385	4.925	0.00143224	0.0337062
ENSG00000156738	MS4A1	membrane spanning 4-domains A1	65	1454	22.473	4.49	0.000457151	0.0191232
ENSG00000157005	SST	somatostatin	125	243	1.939	0.955	0.00182256	0.0382667
ENSG00000157734	SNX22	sorting nexin 22	18	78	4.448	2.153	0.000118766	0.00952223
ENSG00000158457	TSPAN33	tetraspanin 33	105	224	2.13	1.091	0.000285501	0.0153843
ENSG00000158481	CD1C	CD1c molecule	30	278	9.097	3.185	0.000582302	0.0215976
ENSG00000158517	NCF1	neutrophil cytosolic factor 1	30	93	3.158	1.659	8.36e-07	0.00061216
ENSG00000159423	ALDH4A1	aldehyde dehydrogenase 4 family member A1	5	17	3.313	1.728	0.000680005	0.0234397
ENSG00000159618	ADGRG5	adhesion G protein-coupled receptor G5	46	88	1.942	0.958	0.00173342	0.0371658
ENSG00000159958	TNFRSF13C	TNF receptor superfamily member 13C	26	318	12.352	3.627	1.09e-05	0.00243189
ENSG00000160223	ICOSLG	inducible T-cell costimulator ligand	40	75	1.898	0.924	0.00240818	0.0439009
ENSG00000160255	ITGB2	integrin subunit beta 2	95	204	2.135	1.094	1.01e-05	0.00235768
ENSG00000160408	ST6GALNAC6	ST6 N-acetylgalactosaminide alpha-2,6-sialyltransferase 6	97	176	1.804	0.851	0.000450786	0.0189539
ENSG00000160683	CXCR5	C-X-C motif chemokine receptor 5	4	90	25.516	4.673	0.000378681	0.0173493
ENSG00000160856	FCRL3	Fc receptor like 3	18	284	15.538	3.958	0.000327871	0.0162505
ENSG00000160991	ORAI2	ORAI calcium release-activated calcium modulator 2	63	176	2.788	1.479	4.48e-05	0.00518083
ENSG00000161091	MFSD12	major facilitator superfamily domain containing 12	76	140	1.837	0.877	0.000236598	0.0139201
ENSG00000161281	COX7A1	cytochrome c oxidase subunit 7A1	8	22	2.613	1.386	0.00185465	0.038486
ENSG00000161298	ZNF382	zinc finger protein 382	25	48	1.922	0.943	0.00080409	0.0253894
ENSG00000162267	ITIH3	inter-alpha-trypsin inhibitor heavy chain 3	3	58	18.414	4.203	1.71e-07	0.000166093
ENSG00000162734	PEA15	phosphoprotein enriched in astrocytes 15	756	1241	1.642	0.715	1.32e-07	0.000154275
ENSG00000162894	FCMR	Fc fragment of IgM receptor	105	520	4.934	2.303	0.000305953	0.0157334
ENSG00000163041	H3F3A	H3 histone family member 3A	7332	10065	1.373	0.457	0.000637576	0.0225872
ENSG00000163154	TNFAIP8L2	TNF alpha induced protein 8 like 2	49	97	1.98	0.986	0.000535093	0.0210296
ENSG00000163453	IGFBP7	insulin like growth factor binding protein 7	527	823	1.561	0.642	0.00105113	0.0290156
ENSG00000163508	EOMES	eomesodermin	7	32	4.231	2.081	2.19e-06	0.00101972
ENSG00000163518	FCRL4	Fc receptor like 4	5	67	12.664	3.663	0.000166923	0.0113896
ENSG00000163568	AIM2	absent in melanoma 2	21	126	5.971	2.578	3.51e-05	0.00459526
ENSG00000163931	TKT	transketolase	371	712	1.922	0.943	0.000318962	0.0160158
ENSG00000164088	PPM1M	protein phosphatase, Mg2+/Mn2+ dependent 1M	81	149	1.845	0.884	0.000489973	0.0199353
ENSG00000164485	IL22RA2	interleukin 22 receptor subunit alpha 2	3	27	7.986	2.998	0.000776953	0.0251332
ENSG00000164692	COL1A2	collagen type I alpha 2 chain	1458	2377	1.63	0.705	0.0011063	0.0297429
ENSG00000164822	DEFA6	defensin alpha 6	19868	47873	2.41	1.269	0.000102957	0.00859168
ENSG00000165271	NOL6	nucleolar protein 6	109	165	1.509	0.593	0.00192625	0.0391862
ENSG00000165457	FOLR2	folate receptor beta	61	127	2.083	1.059	0.000214521	0.0132914
ENSG00000165507	C10orf10	chromosome 10 open reading frame 10	38	85	2.206	1.142	0.00108711	0.0296346
ENSG00000166428	PLD4	phospholipase D family member 4	8	26	3.107	1.636	0.000117526	0.00946927
ENSG00000166794	PPIB	peptidylprolyl isomerase B	1429	2326	1.628	0.703	0.00257415	0.0455166
ENSG00000166923	GREM1	gremlin 1, DAN family BMP antagonist	53	244	4.646	2.216	1.64e-05	0.0028953
ENSG00000166986	MARS	methionyl-tRNA synthetase	438	616	1.408	0.494	4.43e-05	0.00518083
ENSG00000166997	CNPY4	canopy FGF signaling regulator 4	146	196	1.342	0.425	0.00158146	0.0355306
ENSG00000167074	TEF	TEF, PAR bZIP transcription factor	308	503	1.634	0.708	0.000469763	0.0193492
ENSG00000167483	FAM129C	family with sequence similarity 129 member C	7	232	35.382	5.145	0.000344974	0.016743
ENSG00000167552	TUBA1A	tubulin alpha 1a	319	545	1.705	0.77	6.67e-05	0.00672687
ENSG00000167815	PRDX2	peroxiredoxin 2	484	971	2.006	1.004	0.000806135	0.0254049
ENSG00000167895	TMC8	transmembrane channel like 8	87	213	2.426	1.279	0.0010978	0.0296985
ENSG00000168209	DDIT4	DNA damage inducible transcript 4	210	360	1.718	0.78	0.00252062	0.0451191
ENSG00000168268	NT5DC2	5'-nucleotidase domain containing 2	28	64	2.282	1.191	7.94e-06	0.00211136
ENSG00000168758	SEMA4C	semaphorin 4C	50	93	1.864	0.898	0.00176371	0.0375126
ENSG00000168802	CHTF8	chromosome transmission fidelity factor 8	731	1117	1.528	0.612	0.000448924	0.018925
ENSG00000168918	INPP5D	inositol polyphosphate-5-phosphatase D	198	425	2.137	1.096	0.000615889	0.021996
ENSG00000169347	GP2	glycoprotein 2	130	352	2.697	1.432	0.000540336	0.0210296
ENSG00000169442	CD52	CD52 molecule	496	1365	2.753	1.461	7.13e-05	0.00697882
ENSG00000169991	IFFO2	intermediate filament family orphan 2	144	233	1.629	0.704	0.000299004	0.0156585
ENSG00000170054	SERPINA9	serpin family A member 9	0	42	86.769	6.439	0.00262074	0.0460169
ENSG00000170525	PFKFB3	6-phosphofructo-2-kinase/fructose-2,6-biphosphatase 3	259	440	1.697	0.763	0.00222453	0.0419898
ENSG00000170786	SDR16C5	short chain dehydrogenase/reductase family 16C member 5	17	342	20.687	4.371	0.000173832	0.0116049
ENSG00000170989	S1PR1	sphingosine-1-phosphate receptor 1	58	105	1.796	0.845	0.0026417	0.0460169
ENSG00000171097	KYAT1	kynurenine aminotransferase 1	24	46	1.876	0.907	0.00216894	0.0412981
ENSG00000171130	ATP6V0E2	ATPase H+ transporting V0 subunit e2	17	52	3.002	1.586	0.000658039	0.0228825
ENSG00000171608	PIK3CD	phosphatidylinositol-4,5-bisphosphate 3-kinase catalytic subunit delta	114	269	2.354	1.235	0.000728565	0.0243201
ENSG00000171621	SPSB1	splA/ryanodine receptor domain and SOCS box containing 1	202	386	1.911	0.935	0.000108581	0.00896974
ENSG00000171840	NINJ2	ninjurin 2	10	24	2.387	1.255	0.00082732	0.0256768
ENSG00000171863	RPS7	ribosomal protein S7	5326	8762	1.645	0.718	5.96e-05	0.00645612
ENSG00000172349	IL16	interleukin 16	264	625	2.363	1.241	0.000409992	0.0182613
ENSG00000172794	RAB37	RAB37, member RAS oncogene family	98	188	1.904	0.929	0.00127265	0.0315867
ENSG00000172809	RPL38	ribosomal protein L38	2809	3963	1.411	0.497	0.00194283	0.0393767
ENSG00000173113	TRMT112	tRNA methyltransferase subunit 11-2	248	513	2.069	1.049	0.000514814	0.020571
ENSG00000173227	SYT12	synaptotagmin 12	3	23	7.91	2.984	0.00177063	0.0375135
ENSG00000173269	MMRN2	multimerin 2	40	71	1.784	0.835	0.00297178	0.0494068
ENSG00000174123	TLR10	toll like receptor 10	32	323	10.008	3.323	0.000355769	0.016916
ENSG00000174444	RPL4	ribosomal protein L4	6015	10102	1.679	0.748	2.72e-05	0.00394563
ENSG00000174748	RPL15	ribosomal protein L15	5197	7031	1.353	0.436	0.0027895	0.047675
ENSG00000175040	CHST2	carbohydrate sulfotransferase 2	39	73	1.846	0.885	0.00117924	0.030698
ENSG00000175115	PACS1	phosphofurin acidic cluster sorting protein 1	96	179	1.859	0.895	0.00288347	0.0486708
ENSG00000175183	CSRP2	cysteine and glycine rich protein 2	32	85	2.702	1.434	0.000205195	0.013146
ENSG00000175334	BANF1	barrier to autointegration factor 1	569	846	1.487	0.573	0.00226479	0.0424804
ENSG00000175445	LPL	lipoprotein lipase	41	95	2.292	1.197	0.00189499	0.0389378
ENSG00000175567	UCP2	uncoupling protein 2	150	358	2.383	1.253	0.00022451	0.0137371
ENSG00000175792	RUVBL1	RuvB like AAA ATPase 1	104	179	1.732	0.792	0.000267919	0.0150127
ENSG00000176170	SPHK1	sphingosine kinase 1	3	19	7.095	2.827	2.25e-05	0.00350681
ENSG00000176533	GNG7	G protein subunit gamma 7	45	93	2.094	1.066	0.00139559	0.0330767
ENSG00000176903	PNMA1	paraneoplastic Ma antigen 1	140	217	1.546	0.628	0.000771661	0.025088
ENSG00000177192	PUS1	pseudouridylate synthase 1	40	69	1.726	0.787	0.00118419	0.030698
ENSG00000177455	CD19	CD19 molecule	5	174	35.781	5.161	1.43e-05	0.00274759
ENSG00000177984	LCN15	lipocalin 15	8	31	3.637	1.863	7.79e-05	0.00731987
ENSG00000178035	IMPDH2	inosine monophosphate dehydrogenase 2	550	835	1.518	0.602	4.42e-05	0.00518083
ENSG00000179041	RRS1	ribosome biogenesis regulator homolog	49	104	2.142	1.099	7.53e-08	0.000111901
ENSG00000179409	GEMIN4	gem nuclear organelle associated protein 4	63	99	1.582	0.662	0.000448942	0.018925
ENSG00000179715	PCED1B	PC-esterase domain containing 1B	19	57	3.001	1.585	0.000394569	0.0177296
ENSG00000179855	GIPC3	GIPC PDZ domain containing family member 3	11	24	2.242	1.165	0.0012115	0.0311336
ENSG00000180096	2001-09-01	septin 1	118	285	2.408	1.268	0.000541298	0.0210296
ENSG00000180198	RCC1	regulator of chromosome condensation 1	295	456	1.545	0.628	0.000782164	0.0251719
ENSG00000180304	OAZ2	ornithine decarboxylase antizyme 2	1015	1330	1.311	0.391	5.44e-05	0.00597017
ENSG00000180353	HCLS1	hematopoietic cell-specific Lyn substrate 1	729	1298	1.78	0.832	0.00198667	0.0396753
ENSG00000181617	FDCSP	follicular dendritic cell secreted protein	20	763	38.383	5.262	0.00263595	0.0460169
ENSG00000182162	P2RY8	purinergic receptor P2Y8	22	95	4.345	2.119	4.31e-06	0.00147688
ENSG00000182183	FAM159A	family with sequence similarity 159 member A	6	36	5.92	2.566	0.00014921	0.0108497
ENSG00000182195	LDOC1	LDOC1, regulator of NFKB signaling	4	15	4.034	2.012	4.87e-05	0.00545344
ENSG00000182487	NCF1B	neutrophil cytosolic factor 1B pseudogene	5	23	4.603	2.203	0.000142265	0.0105734
ENSG00000182492	BGN	biglycan	21	61	2.981	1.576	0.000156615	0.011103
ENSG00000182749	PAQR7	progestin and adipoQ receptor family member 7	216	440	2.039	1.028	0.000930314	0.0270163
ENSG00000182866	LCK	LCK proto-oncogene, Src family tyrosine kinase	115	227	1.975	0.982	0.00202458	0.0399248
ENSG00000183741	CBX6	chromobox 6	149	229	1.546	0.628	0.00127459	0.0315867
ENSG00000183813	CCR4	C-C motif chemokine receptor 4	10	70	6.784	2.762	1.49e-05	0.00283083
ENSG00000183918	SH2D1A	SH2 domain containing 1A	32	89	2.74	1.454	0.000299653	0.0156585
ENSG00000184293	CLECL1	C-type lectin like 1	13	47	3.696	1.886	0.00282156	0.0480224
ENSG00000184602	SNN	stannin	90	228	2.526	1.337	9.97e-05	0.00853395
ENSG00000184840	TMED9	transmembrane p24 trafficking protein 9	1104	1728	1.567	0.648	0.000128114	0.010026
ENSG00000184922	FMNL1	formin like 1	77	154	1.98	0.985	0.000546877	0.0210377
ENSG00000185163	DDX51	DEAD-box helicase 51	101	149	1.484	0.569	0.00237929	0.0436764
ENSG00000185245	GP1BA	glycoprotein Ib platelet alpha subunit	2	34	14.394	3.847	1.55e-06	0.000817335
ENSG00000185565	LSAMP	limbic system-associated membrane protein	19	93	4.789	2.26	8.86e-05	0.00801323
ENSG00000185641	AC034236.1		25	92	3.656	1.87	2.75e-06	0.0010706
ENSG00000185905	C16orf54	chromosome 16 open reading frame 54	49	128	2.572	1.363	9.2e-05	0.00817394
ENSG00000185989	RASA3	RAS p21 protein activator 3	70	137	1.957	0.969	2.27e-06	0.00101972
ENSG00000186265	BTLA	B and T lymphocyte associated	39	83	2.113	1.08	0.00136536	0.0326966
ENSG00000186395	KRT10	keratin 10	148	233	1.571	0.652	0.00280959	0.0478683
ENSG00000186517	ARHGAP30	Rho GTPase activating protein 30	645	1092	1.692	0.759	0.00256947	0.0454863
ENSG00000186716	BCR	BCR, RhoGEF and GTPase activating protein	162	244	1.499	0.584	0.00210833	0.040749
ENSG00000187764	SEMA4D	semaphorin 4D	231	358	1.55	0.632	0.00176732	0.0375135
ENSG00000187912	CLEC17A	C-type lectin domain containing 17A	8	158	19.066	4.253	1.42e-05	0.00274759
ENSG00000187994	RINL	Ras and Rab interactor like	62	164	2.658	1.411	9.67e-08	0.000123477
ENSG00000188404	SELL	selectin L	70	429	6.099	2.609	0.00159039	0.0356049
ENSG00000188488	SERPINA5	serpin family A member 5	3	18	5.715	2.515	0.00261851	0.0460169
ENSG00000188677	PARVB	parvin beta	53	87	1.61	0.687	0.000894319	0.0267903
ENSG00000188822	CNR2	cannabinoid receptor 2	6	138	21.346	4.416	7.54e-05	0.00716841
ENSG00000188910	GJB3	gap junction protein beta 3	2	15	8.592	3.103	0.00233843	0.0433152
ENSG00000189343	AC004448.1		31	83	2.7	1.433	0.00264184	0.0460169
ENSG00000196092	PAX5	paired box 5	10	321	31.704	4.987	0.000391268	0.0176706
ENSG00000196154	S100A4	S100 calcium binding protein A4	623	1092	1.752	0.809	1.29e-05	0.00268271
ENSG00000196405	EVL	Enah/Vasp-like	404	656	1.625	0.7	8.52e-05	0.0079197
ENSG00000196465	MYL6B	myosin light chain 6B	46	83	1.81	0.856	0.00121253	0.0311336
ENSG00000196562	SULF2	sulfatase 2	177	289	1.629	0.704	0.000578462	0.0215976
ENSG00000196656	AC004057.1		33	111	3.41	1.77	6.87e-05	0.00676636
ENSG00000196924	FLNA	filamin A	189	392	2.071	1.05	0.00228922	0.0427914
ENSG00000197043	ANXA6	annexin A6	495	1412	2.852	1.512	1.14e-10	4.64e-07
ENSG00000197093	GAL3ST4	galactose-3-O-sulfotransferase 4	39	73	1.862	0.897	0.00203067	0.0399248
ENSG00000197457	STMN3	stathmin 3	14	34	2.417	1.274	0.0025242	0.0451191
ENSG00000197471	SPN	sialophorin	581	906	1.558	0.64	0.000911992	0.0268283
ENSG00000197756	RPL37A	ribosomal protein L37a	9834	14229	1.447	0.533	0.00191417	0.0390375
ENSG00000197958	RPL12	ribosomal protein L12	3583	6608	1.844	0.883	6.27e-05	0.00661796
ENSG00000198055	GRK6	G protein-coupled receptor kinase 6	54	108	2.001	1	0.00266223	0.0461674
ENSG00000198106	AC025279.1		15	148	9.75	3.285	0.000136498	0.0104322
ENSG00000198286	CARD11	caspase recruitment domain family member 11	30	83	2.742	1.455	4.13e-05	0.0050909
ENSG00000198755	RPL10A	ribosomal protein L10a	2546	4048	1.59	0.669	0.00112622	0.0298549
ENSG00000198796	ALPK2	alpha kinase 2	2	36	22.058	4.463	9.67e-07	0.000642912
ENSG00000198873	GRK5	G protein-coupled receptor kinase 5	333	520	1.56	0.641	0.000313913	0.015981
ENSG00000198937	CCDC167	coiled-coil domain containing 167	43	95	2.204	1.14	0.00143939	0.0337288
ENSG00000200795	RNU4-1	RNA, U4 small nuclear 1	6	26	4.749	2.248	0.0002868	0.0153843
ENSG00000203710	CR1	complement C3b/C4b receptor 1 (Knops blood group)	26	190	7.307	2.869	0.00246991	0.0445892
ENSG00000204054	LINC00963	long intergenic non-protein coding RNA 963	267	431	1.616	0.692	0.00100318	0.028241
ENSG00000204220	PFDN6	prefoldin subunit 6	592	933	1.577	0.658	4.37e-05	0.00518083
ENSG00000204252	HLA-DOA	major histocompatibility complex, class II, DO alpha	212	436	2.049	1.035	0.000518533	0.0206354
ENSG00000204282	TNRC6C-AS1	TNRC6C antisense RNA 1	116	208	1.797	0.845	0.00178154	0.0376959
ENSG00000204475	NCR3	natural cytotoxicity triggering receptor 3	4	28	6.76	2.757	3.29e-05	0.00445452
ENSG00000204482	LST1	leukocyte specific transcript 1	158	250	1.578	0.658	0.000133889	0.0102897
ENSG00000204516	MICB	MHC class I polypeptide-related sequence B	45	80	1.811	0.857	0.00293881	0.0491988
ENSG00000205056	LINC02397	long intergenic non-protein coding RNA 2397	3	54	15.909	3.992	0.000958163	0.0274942
ENSG00000205542	TMSB4X	thymosin beta 4, X-linked	50169	85516	1.705	0.769	2.09e-07	0.000180344
ENSG00000210135	MT-TN	mitochondrially encoded tRNA asparagine	40	107	2.684	1.425	0.000605569	0.0219616
ENSG00000211592	IGKC	immunoglobulin kappa constant	6979	13754	1.971	0.979	0.00110289	0.029718
ENSG00000211625	IGKV3D-20	immunoglobulin kappa variable 3D-20	6	26	4.176	2.062	0.00218411	0.0414671
ENSG00000211644	IGLV1-51	immunoglobulin lambda variable 1-51	47	133	2.843	1.508	0.000447485	0.018925
ENSG00000211648	IGLV1-47	immunoglobulin lambda variable 1-47	19	64	3.35	1.744	3.76e-05	0.00484098
ENSG00000211660	IGLV2-23	immunoglobulin lambda variable 2-23	13	76	5.776	2.53	2.01e-05	0.00319601
ENSG00000211666	IGLV2-14	immunoglobulin lambda variable 2-14	32	208	6.553	2.712	9.81e-08	0.000123477
ENSG00000211668	IGLV2-11	immunoglobulin lambda variable 2-11	28	114	4.074	2.026	0.000612247	0.021996
ENSG00000211670	IGLV3-9	immunoglobulin lambda variable 3-9 (gene/pseudogene)	2	30	12.75	3.672	6.74e-05	0.00672687
ENSG00000211673	IGLV3-1	immunoglobulin lambda variable 3-1	28	93	3.296	1.721	0.0028009	0.04777
ENSG00000211772	TRBC2	T-cell receptor beta constant 2	142	310	2.187	1.129	0.00290449	0.0489247
ENSG00000211893	IGHG2	immunoglobulin heavy constant gamma 2 (G2m marker)	51	275	5.444	2.445	0.000166042	0.0113896
ENSG00000211896	IGHG1	immunoglobulin heavy constant gamma 1 (G1m marker)	186	892	4.803	2.264	0.000137131	0.0104322
ENSG00000211897	IGHG3	immunoglobulin heavy constant gamma 3 (G3m marker)	9	69	7.668	2.939	0.000608862	0.021996
ENSG00000211898	IGHD	immunoglobulin heavy constant delta	0	32	84.913	6.408	0.000923245	0.0269173
ENSG00000211899	IGHM	immunoglobulin heavy constant mu	354	2285	6.457	2.691	4.46e-11	3.65e-07
ENSG00000213609	RPL7AP50	ribosomal protein L7a pseudogene 50	15	38	2.513	1.33	0.00262968	0.0460169
ENSG00000213626	LBH	limb bud and heart development	271	517	1.905	0.93	0.000547722	0.0210377
ENSG00000213654	GPSM3	G protein signaling modulator 3	131	304	2.329	1.22	0.000146227	0.0107733
ENSG00000213722	DDAH2	dimethylarginine dimethylaminohydrolase 2	197	384	1.95	0.964	3.6e-05	0.0046737
ENSG00000213741	RPS29	ribosomal protein S29	5181	7982	1.541	0.624	0.000925493	0.0269348
ENSG00000213967	ZNF726	zinc finger protein 726	8	32	3.827	1.936	0.00120712	0.0310924
ENSG00000214389	RPS3AP26	ribosomal protein S3a pseudogene 26	46	114	2.492	1.318	4.58e-05	0.0051965
ENSG00000214535	RPS15AP1	ribosomal protein S15a pseudogene 1	11	37	3.315	1.729	8.87e-05	0.00801323
ENSG00000214706	IFRD2	interferon related developmental regulator 2	61	111	1.827	0.869	0.00207249	0.0401888
ENSG00000224137	LINC01857	long intergenic non-protein coding RNA 1857	2	41	22.941	4.52	0.000722635	0.0242699
ENSG00000226360	AC096919.1		13	42	3.235	1.694	0.00034377	0.0167391
ENSG00000226950	DANCR	differentiation antagonizing non-protein coding RNA	124	199	1.598	0.676	0.000232581	0.0138885
ENSG00000226979	LTA	lymphotoxin alpha	5	29	6.19	2.63	1.34e-05	0.00268271
ENSG00000227039	ITGB2-AS1	ITGB2 antisense RNA 1	22	70	3.151	1.656	6.72e-06	0.00186256
ENSG00000227081	AC005912.1		171	428	2.499	1.322	0.00240194	0.0438755
ENSG00000227507	LTB	lymphotoxin beta	31	214	6.966	2.8	0.000180418	0.0119471
ENSG00000227615	AP001324.1		16	46	2.868	1.52	0.00157657	0.0355183
ENSG00000228474	OST4	oligosaccharyltransferase complex subunit 4, non-catalytic	789	1239	1.57	0.651	0.00158874	0.0356049
ENSG00000232573	RPL3P4	ribosomal protein L3 pseudogene 4	103	285	2.752	1.46	0.00168424	0.0365835
ENSG00000234184	LINC01781	long intergenic non-protein coding RNA 1781	5	72	13.441	3.749	0.000150827	0.0109147
ENSG00000235552	AP005202.1		127	248	1.952	0.965	0.00246187	0.0445892
ENSG00000235621	LINC00494	long intergenic non-protein coding RNA 494	4	24	6.808	2.767	0.00105003	0.0290156
ENSG00000238121	LINC00426	long intergenic non-protein coding RNA 426	26	73	2.784	1.477	0.00156661	0.0354895
ENSG00000239697	TNFSF12	TNF superfamily member 12	23	48	2.079	1.056	0.000211498	0.0132914
ENSG00000240505	TNFRSF13B	TNF receptor superfamily member 13B	33	161	4.948	2.307	4.84e-05	0.00545344
ENSG00000243238	IGKV2-30	immunoglobulin kappa variable 2-30	15	51	3.44	1.783	0.00214117	0.0410563
ENSG00000244313	AC024293.1		24	62	2.583	1.369	0.00185229	0.038486
ENSG00000244398	AC116533.1		126	260	2.059	1.042	0.00134168	0.0323664
ENSG00000244734	HBB	hemoglobin subunit beta	93	696	7.496	2.906	0.000321327	0.0160722
ENSG00000245164	LINC00861	long intergenic non-protein coding RNA 861	34	81	2.347	1.231	0.00134138	0.0323664
ENSG00000246174	KCTD21-AS1	KCTD21 antisense RNA 1	5	39	8.204	3.036	1.5e-07	0.000163536
ENSG00000247077	PGAM5	PGAM family member 5, mitochondrial serine/threonine protein phosphatase	198	302	1.52	0.604	1.65e-05	0.0028953
ENSG00000247774	PCED1B-AS1	PCED1B antisense RNA 1	67	171	2.544	1.347	0.00241885	0.0440075
ENSG00000247982	LINC00926	long intergenic non-protein coding RNA 926	55	260	4.701	2.233	0.000699107	0.0237601
ENSG00000261040	WFDC21P	WAP four-disulfide core domain 21, pseudogene	11	45	3.909	1.967	1.26e-06	0.000707999
ENSG00000261115	TMEM178B	transmembrane protein 178B	10	33	3.099	1.632	0.00301159	0.0497552
ENSG00000261786	AC006058.1		1	16	21.98	4.458	6.66e-05	0.00672687
ENSG00000262445	AC099684.2		4	20	5.765	2.527	0.000369054	0.0172464
ENSG00000263266	RPS7P1	ribosomal protein S7 pseudogene 1	24	69	2.847	1.509	6.97e-07	0.000542679
ENSG00000263934	SNORD3A	small nucleolar RNA, C/D box 3A	91	238	2.607	1.383	0.002763	0.0473707
ENSG00000264920	AC018521.5		156	263	1.684	0.752	0.000640152	0.0226013
ENSG00000265148	TSPOAP1-AS1	TSPOAP1 antisense RNA 1	16	53	3.299	1.722	0.000563947	0.0212044
ENSG00000267121	AC008105.3		24	60	2.49	1.316	7.59e-05	0.00717757
ENSG00000269293	ZSCAN16-AS1	ZSCAN16 antisense RNA 1	53	86	1.616	0.693	0.00256933	0.0454863
ENSG00000269404	SPIB	Spi-B transcription factor	106	400	3.756	1.909	0.00190302	0.0389625
ENSG00000269553	U62631.1		3	27	9.295	3.216	0.000862541	0.0262714
ENSG00000270647	TAF15	TATA-box binding protein associated factor 15	6050	7833	1.295	0.373	0.00139555	0.0330767
ENSG00000271856	LINC01215	long intergenic non-protein coding RNA 1215	11	86	7.704	2.946	0.00249191	0.0448386
ENSG00000274736	CCL23	C-C motif chemokine ligand 23	2	60	25.009	4.644	0.000273753	0.0150127
ENSG00000275234	AC010503.4		813	1235	1.52	0.604	0.00102381	0.0285271
ENSG00000277734	TRAC	T-cell receptor alpha constant	223	379	1.701	0.766	0.00097566	0.0276913
ENSG00000278196	IGLV2-8	immunoglobulin lambda variable 2-8	7	32	4.769	2.254	2.73e-05	0.00394563
ENSG00000279124	AL356585.2		7	22	3.078	1.622	0.000455727	0.0191125
ENSG00000279369	AC046185.3		4	22	5.591	2.483	1.57e-05	0.00286774
ENSG00000280208	GGT4P	gamma-glutamyltransferase 4 pseudogene	12	45	3.767	1.913	0.000101342	0.00854409
ENSG00000281398	SNHG4	small nucleolar RNA host gene 4	14	33	2.439	1.286	0.000415334	0.0182613
ENSG00000283041	AC008038.1		73	255	3.516	1.814	6.89e-08	0.000111901
ENSG00000001629	ANKIB1	ankyrin repeat and IBR domain containing 1	1138	742	0.653	-0.615	0.00037424	0.0173493
ENSG00000005483	KMT2E	lysine methyltransferase 2E	1877	1304	0.695	-0.525	0.00123759	0.0313846
ENSG00000005889	ZFX	zinc finger protein, X-linked	900	626	0.695	-0.524	0.000700194	0.0237601
ENSG00000006459	KDM7A	lysine demethylase 7A	1956	1323	0.676	-0.565	4.14e-05	0.0050909
ENSG00000006747	SCIN	scinderin	8316	4953	0.596	-0.748	1.05e-05	0.00239392
ENSG00000008294	SPAG9	sperm associated antigen 9	3630	2299	0.633	-0.659	0.00104368	0.0289811
ENSG00000008311	AASS	aminoadipate-semialdehyde synthase	139	64	0.46	-1.121	0.000515658	0.020571
ENSG00000008869	HEATR5B	HEAT repeat containing 5B	951	625	0.657	-0.605	0.0024461	0.0444044
ENSG00000011258	MBTD1	mbt domain containing 1	992	660	0.666	-0.587	0.000697382	0.0237601
ENSG00000011566	MAP4K3	mitogen-activated protein kinase kinase kinase kinase 3	1006	692	0.688	-0.54	0.00143832	0.0337288
ENSG00000012504	NR1H4	nuclear receptor subfamily 1 group H member 4	4721	2981	0.631	-0.664	1.51e-05	0.00284734
ENSG00000023909	GCLM	glutamate-cysteine ligase modifier subunit	1292	815	0.631	-0.664	0.000346919	0.0167876
ENSG00000024048	UBR2	ubiquitin protein ligase E3 component n-recognin 2	2363	1593	0.674	-0.569	1.3e-05	0.00268271
ENSG00000028203	VEZT	vezatin, adherens junctions transmembrane protein	1164	823	0.707	-0.5	9.45e-05	0.00826301
ENSG00000029364	SLC39A9	solute carrier family 39 member 9	2146	1562	0.728	-0.458	1.69e-05	0.0028953
ENSG00000033800	PIAS1	protein inhibitor of activated STAT 1	1195	916	0.767	-0.384	0.00190334	0.0389625
ENSG00000040199	PHLPP2	PH domain and leucine rich repeat protein phosphatase 2	6113	3699	0.605	-0.725	0.00101002	0.0283359
ENSG00000047365	ARAP2	ArfGAP with RhoGAP domain, ankyrin repeat and PH domain 2	1024	739	0.721	-0.472	9.28e-05	0.0081998
ENSG00000047634	SCML1	sex comb on midleg like 1 (Drosophila)	507	314	0.62	-0.689	0.000113768	0.00925765
ENSG00000049759	NEDD4L	neural precursor cell expressed, developmentally down-regulated 4-like, E3 ubiquitin protein ligase	2691	1895	0.704	-0.507	0.000155921	0.011103
ENSG00000054983	GALC	galactosylceramidase	1302	948	0.728	-0.459	0.00266459	0.0461674
ENSG00000055609	KMT2C	lysine methyltransferase 2C	1837	1270	0.691	-0.533	0.000838659	0.0258813
ENSG00000059769	DNAJC25	DnaJ heat shock protein family (Hsp40) member C25	331	257	0.775	-0.367	0.00185985	0.038486
ENSG00000060140	STYK1	serine/threonine/tyrosine kinase 1	548	338	0.616	-0.699	0.000787659	0.0251719
ENSG00000061987	MON2	MON2 homolog, regulator of endosome-to-Golgi trafficking	1279	880	0.688	-0.539	0.000905272	0.0268122
ENSG00000062725	APPBP2	amyloid beta precursor protein binding protein 2	805	575	0.713	-0.488	0.00117605	0.030698
ENSG00000065243	PKN2	protein kinase N2	2735	1843	0.674	-0.569	0.00035536	0.016916
ENSG00000066739	ATG2B	autophagy related 2B	1281	832	0.65	-0.621	4.57e-06	0.00149525
ENSG00000067141	NEO1	neogenin 1	2938	1943	0.661	-0.596	2.84e-05	0.00404224
ENSG00000067601	PMS2P4	PMS1 homolog 2, mismatch repair system component pseudogene 4	50	27	0.54	-0.89	0.000801241	0.0253894
ENSG00000069869	NEDD4	neural precursor cell expressed, developmentally down-regulated 4, E3 ubiquitin protein ligase	1398	930	0.666	-0.587	0.00154574	0.0351628
ENSG00000070018	LRP6	LDL receptor related protein 6	1205	703	0.583	-0.778	0.00197038	0.0395828
ENSG00000070019	GUCY2C	guanylate cyclase 2C	5318	3632	0.683	-0.55	0.000659778	0.0228825
ENSG00000071073	MGAT4A	mannosyl (alpha-1,3-)-glycoprotein beta-1,4-N-acetylglucosaminyltransferase, isozyme A	9177	6001	0.654	-0.613	0.0003021	0.0157075
ENSG00000071967	CYBRD1	cytochrome b reductase 1	29769	16415	0.551	-0.859	0.000686876	0.0235032
ENSG00000072364	AFF4	AF4/FMR2 family member 4	2532	1754	0.692	-0.531	0.000638011	0.0225872
ENSG00000073331	ALPK1	alpha kinase 1	459	331	0.721	-0.472	0.000650963	0.0228465
ENSG00000073417	PDE8A	phosphodiesterase 8A	1061	707	0.666	-0.586	0.00037709	0.0173493
ENSG00000073614	KDM5A	lysine demethylase 5A	1291	952	0.738	-0.439	0.00152995	0.0349496
ENSG00000074356	NCBP3	nuclear cap binding subunit 3	1117	837	0.75	-0.415	0.000536825	0.0210296
ENSG00000075539	FRYL	FRY like transcription coactivator	2763	1744	0.631	-0.664	0.00045977	0.0191348
ENSG00000076641	PAG1	phosphoprotein membrane anchor with glycosphingolipid microdomains 1	2845	1686	0.593	-0.755	0.000400623	0.0179523
ENSG00000076685	NT5C2	5'-nucleotidase, cytosolic II	1446	1150	0.796	-0.33	0.000900739	0.0268122
ENSG00000079335	CDC14A	cell division cycle 14A	1250	831	0.665	-0.589	2.07e-05	0.00325549
ENSG00000079482	OPHN1	oligophrenin 1	237	161	0.677	-0.563	0.000319113	0.0160158
ENSG00000079691	CARMIL1	capping protein regulator and myosin 1 linker 1	1930	1222	0.634	-0.659	2.56e-06	0.00102145
ENSG00000081026	MAGI3	membrane associated guanylate kinase, WW and PDZ domain containing 3	1169	778	0.666	-0.586	0.000731606	0.024371
ENSG00000081800	SLC13A1	solute carrier family 13 member 1	4561	2672	0.586	-0.772	0.000739095	0.0243722
ENSG00000082269	FAM135A	family with sequence similarity 135 member A	1392	944	0.678	-0.56	0.00166322	0.036412
ENSG00000082458	DLG3	discs large MAGUK scaffold protein 3	968	713	0.737	-0.44	0.00133315	0.0323038
ENSG00000082701	GSK3B	glycogen synthase kinase 3 beta	1192	889	0.746	-0.423	0.00296924	0.0494068
ENSG00000083097	DOPEY1	dopey family member 1	951	614	0.646	-0.631	0.00153213	0.0349505
ENSG00000084676	NCOA1	nuclear receptor coactivator 1	1424	997	0.7	-0.515	0.00129454	0.031792
ENSG00000085274	MYNN	myoneurin	564	391	0.693	-0.528	0.000706913	0.0239095
ENSG00000085365	SCAMP1	secretory carrier membrane protein 1	754	538	0.713	-0.488	9.55e-05	0.00826811
ENSG00000085788	DDHD2	DDHD domain containing 2	1849	1270	0.687	-0.542	0.00190173	0.0389625
ENSG00000087338	GMCL1	germ cell-less, spermatogenesis associated 1	1232	939	0.761	-0.393	0.0028374	0.0481916
ENSG00000089818	NECAP1	NECAP endocytosis associated 1	928	726	0.782	-0.355	0.000653714	0.0228465
ENSG00000089902	RCOR1	REST corepressor 1	1113	851	0.765	-0.387	0.00200814	0.039909
ENSG00000090905	TNRC6A	trinucleotide repeat containing 6A	1507	1030	0.683	-0.549	0.000293915	0.0154575
ENSG00000090989	EXOC1	exocyst complex component 1	1027	771	0.751	-0.414	0.000335256	0.0164668
ENSG00000091157	WDR7	WD repeat domain 7	386	264	0.684	-0.547	0.000877037	0.0265601
ENSG00000091409	ITGA6	integrin subunit alpha 6	6326	4676	0.739	-0.436	0.00148963	0.0345697
ENSG00000093167	LRRFIP2	LRR binding FLII interacting protein 2	1872	1457	0.778	-0.362	0.000156811	0.011103
ENSG00000095574	IKZF5	IKAROS family zinc finger 5	581	426	0.734	-0.446	0.00159378	0.0356049
ENSG00000096696	DSP	desmoplakin	6473	4464	0.69	-0.536	2.7e-05	0.00394563
ENSG00000096872	IFT74	intraflagellar transport 74	305	200	0.657	-0.606	0.000222996	0.0137118
ENSG00000100596	SPTLC2	serine palmitoyltransferase long chain base subunit 2	1857	1409	0.759	-0.398	0.00122432	0.0311915
ENSG00000100697	DICER1	dicer 1, ribonuclease III	1406	931	0.662	-0.595	0.00160435	0.0356049
ENSG00000100722	ZC3H14	zinc finger CCCH-type containing 14	1313	969	0.738	-0.438	0.00197969	0.0396326
ENSG00000100744	GSKIP	GSK3B interacting protein	2370	1748	0.738	-0.438	0.00297238	0.0494068
ENSG00000100784	RPS6KA5	ribosomal protein S6 kinase A5	970	648	0.668	-0.582	0.00038646	0.0176216
ENSG00000102081	FMR1	fragile X mental retardation 1	2077	1521	0.732	-0.451	0.000214535	0.0132914
ENSG00000102189	EEA1	early endosome antigen 1	1032	676	0.655	-0.609	0.00054774	0.0210377
ENSG00000102471	NDFIP2	Nedd4 family interacting protein 2	3777	2751	0.728	-0.457	0.00255621	0.0453956
ENSG00000102554	KLF5	Kruppel like factor 5	9469	7224	0.763	-0.391	8.32e-06	0.00212711
ENSG00000102606	ARHGEF7	Rho guanine nucleotide exchange factor 7	942	777	0.824	-0.279	0.00230927	0.0430187
ENSG00000102908	NFAT5	nuclear factor of activated T-cells 5	1218	730	0.599	-0.74	0.00112969	0.0298755
ENSG00000102921	N4BP1	NEDD4 binding protein 1	708	561	0.793	-0.334	0.0027085	0.0465828
ENSG00000103534	TMC5	transmembrane channel like 5	4149	3062	0.738	-0.438	0.00249743	0.0448386
ENSG00000103540	CCP110	centriolar coiled-coil protein 110	468	360	0.769	-0.378	0.00109747	0.0296985
ENSG00000104067	TJP1	tight junction protein 1	1561	1145	0.733	-0.447	6.7e-05	0.00672687
ENSG00000104133	SPG11	SPG11, spatacsin vesicle trafficking associated	1586	1185	0.747	-0.421	0.000956684	0.0274942
ENSG00000104154	SLC30A4	solute carrier family 30 member 4	2139	1531	0.716	-0.483	0.00197478	0.0395828
ENSG00000105778	AVL9	AVL9 cell migration associated	1532	1110	0.725	-0.464	0.00152709	0.0349331
ENSG00000105784	RUNDC3B	RUN domain containing 3B	450	306	0.681	-0.555	0.00148137	0.0344655
ENSG00000105926	MPP6	membrane palmitoylated protein 6	678	408	0.602	-0.731	0.00182778	0.0382781
ENSG00000105967	TFEC	transcription factor EC	1235	672	0.544	-0.878	0.00262262	0.0460169
ENSG00000106524	ANKMY2	ankyrin repeat and MYND domain containing 2	680	509	0.748	-0.419	0.000583641	0.0215976
ENSG00000106771	TMEM245	transmembrane protein 245	2094	1468	0.701	-0.512	0.00197411	0.0395828
ENSG00000107290	SETX	senataxin	2332	1770	0.759	-0.398	0.0020123	0.0399248
ENSG00000107669	ATE1	arginyltransferase 1	886	635	0.716	-0.481	0.00131352	0.0320177
ENSG00000107779	BMPR1A	bone morphogenetic protein receptor type 1A	1232	938	0.762	-0.392	0.00234894	0.0434117
ENSG00000107864	CPEB3	cytoplasmic polyadenylation element binding protein 3	484	320	0.66	-0.599	0.000226768	0.0137371
ENSG00000107890	ANKRD26	ankyrin repeat domain 26	223	147	0.66	-0.599	0.00176896	0.0375135
ENSG00000108381	ASPA	aspartoacylase	2100	1271	0.605	-0.725	0.00236285	0.043515
ENSG00000108984	MAP2K6	mitogen-activated protein kinase kinase 6	381	242	0.634	-0.658	0.00125866	0.0314781
ENSG00000109184	DCUN1D4	defective in cullin neddylation 1 domain containing 4	588	431	0.733	-0.448	0.00166521	0.036412
ENSG00000109458	GAB1	GRB2 associated binding protein 1	755	547	0.724	-0.466	0.00207382	0.0401888
ENSG00000109618	SEPSECS	Sep (O-phosphoserine) tRNA:Sec (selenocysteine) tRNA synthase	1352	883	0.653	-0.614	5.37e-05	0.00593927
ENSG00000109787	KLF3	Kruppel like factor 3	3811	2523	0.662	-0.595	0.000529253	0.0209093
ENSG00000109819	PPARGC1A	PPARG coactivator 1 alpha	1011	626	0.619	-0.693	0.000203142	0.0130811
ENSG00000110075	PPP6R3	protein phosphatase 6 regulatory subunit 3	1963	1434	0.731	-0.453	0.000421345	0.0183946
ENSG00000110344	UBE4A	ubiquitination factor E4A	2501	1564	0.625	-0.677	1.16e-06	0.000684752
ENSG00000110422	HIPK3	homeodomain interacting protein kinase 3	2248	1581	0.703	-0.508	0.00246958	0.0445892
ENSG00000110435	PDHX	pyruvate dehydrogenase complex component X	426	313	0.733	-0.447	0.000465094	0.0192338
ENSG00000111052	LIN7A	lin-7 homolog A, crumbs cell polarity complex component	417	221	0.531	-0.913	0.00204067	0.0399248
ENSG00000111530	CAND1	cullin associated and neddylation dissociated 1	2564	1816	0.708	-0.497	0.000319219	0.0160158
ENSG00000111731	C2CD5	C2 calcium dependent domain containing 5	1521	1011	0.665	-0.589	0.000244892	0.0142543
ENSG00000111816	FRK	fyn related Src family tyrosine kinase	3860	2352	0.609	-0.715	0.000588174	0.0216983
ENSG00000111885	MAN1A1	mannosidase alpha class 1A member 1	7577	4941	0.652	-0.617	0.000849875	0.0261175
ENSG00000112146	FBXO9	F-box protein 9	839	655	0.781	-0.357	0.00159789	0.0356049
ENSG00000112200	ZNF451	zinc finger protein 451	790	605	0.764	-0.388	0.00221998	0.0419898
ENSG00000112282	MED23	mediator complex subunit 23	962	667	0.694	-0.528	0.000904057	0.0268122
ENSG00000112701	SENP6	SUMO1/sentrin specific peptidase 6	1584	1171	0.739	-0.436	0.00222821	0.0419898
ENSG00000112782	CLIC5	chloride intracellular channel 5	6939	4189	0.604	-0.728	6.32e-05	0.00661796
ENSG00000112851	ERBIN	erbb2 interacting protein	8434	5587	0.663	-0.594	0.00125097	0.0314196
ENSG00000113328	CCNG1	cyclin G1	4091	2938	0.718	-0.478	0.000362661	0.0170942
ENSG00000113448	PDE4D	phosphodiesterase 4D	477	341	0.714	-0.486	0.00151808	0.0349112
ENSG00000113494	PRLR	prolactin receptor	1650	976	0.591	-0.758	0.00101432	0.0283687
ENSG00000113851	CRBN	cereblon	1066	786	0.737	-0.44	0.00147466	0.0344073
ENSG00000114127	XRN1	5'-3' exoribonuclease 1	2986	1934	0.648	-0.627	4.27e-06	0.00147688
ENSG00000114166	KAT2B	lysine acetyltransferase 2B	1988	1442	0.725	-0.463	0.000539689	0.0210296
ENSG00000114248	LRRC31	leucine rich repeat containing 31	638	331	0.519	-0.946	0.00201871	0.0399248
ENSG00000114315	HES1	hes family bHLH transcription factor 1	325	233	0.719	-0.477	0.00122622	0.0311915
ENSG00000114331	ACAP2	ArfGAP with coiled-coil, ankyrin repeat and PH domains 2	2102	1498	0.712	-0.489	0.000878518	0.0265601
ENSG00000114529	C3orf52	chromosome 3 open reading frame 52	559	378	0.676	-0.565	6.05e-06	0.0017684
ENSG00000114739	ACVR2B	activin A receptor type 2B	299	188	0.631	-0.664	0.000891385	0.0267547
ENSG00000114933	INO80D	INO80 complex subunit D	1026	721	0.701	-0.512	0.000208824	0.0132385
ENSG00000115084	SLC35F5	solute carrier family 35 member F5	3202	2065	0.645	-0.633	0.00185295	0.038486
ENSG00000115464	USP34	ubiquitin specific peptidase 34	2821	1895	0.672	-0.574	0.000355777	0.016916
ENSG00000115474	KCNJ13	potassium voltage-gated channel subfamily J member 13	8303	4041	0.487	-1.039	3.35e-05	0.00445452
ENSG00000115760	BIRC6	baculoviral IAP repeat containing 6	2275	1520	0.668	-0.582	0.000532764	0.0209973
ENSG00000115808	STRN	striatin	1259	858	0.681	-0.553	0.00142738	0.0336401
ENSG00000115947	ORC4	origin recognition complex subunit 4	726	580	0.8	-0.322	0.00157142	0.0355112
ENSG00000115963	RND3	Rho family GTPase 3	1499	1089	0.726	-0.461	0.000834206	0.0258414
ENSG00000116138	DNAJC16	DnaJ heat shock protein family (Hsp40) member C16	477	376	0.79	-0.34	0.000911752	0.0268283
ENSG00000116580	GON4L	gon-4 like	750	570	0.76	-0.396	0.00129831	0.0318368
ENSG00000116704	SLC35D1	solute carrier family 35 member D1	2896	1939	0.669	-0.579	0.000594992	0.0218104
ENSG00000116833	NR5A2	nuclear receptor subfamily 5 group A member 2	2141	1251	0.585	-0.774	5.62e-06	0.00167006
ENSG00000117143	UAP1	UDP-N-acetylglucosamine pyrophosphorylase 1	2781	2066	0.743	-0.429	0.000899003	0.0268122
ENSG00000117523	PRRC2C	proline rich coiled-coil 2C	3498	2516	0.719	-0.475	2.49e-05	0.00380772
ENSG00000119121	TRPM6	transient receptor potential cation channel subfamily M member 6	3548	2209	0.623	-0.684	0.00105198	0.0290156
ENSG00000119862	LGALSL	galectin like	1636	1124	0.687	-0.542	0.00135286	0.0325402
ENSG00000119906	SLF2	SMC5-SMC6 complex localization factor 2	596	429	0.719	-0.475	0.00202788	0.0399248
ENSG00000120162	MOB3B	MOB kinase activator 3B	2270	1591	0.701	-0.513	0.00175122	0.0373928
ENSG00000120549	KIAA1217	KIAA1217	1229	840	0.683	-0.55	6.39e-05	0.00661796
ENSG00000120616	EPC1	enhancer of polycomb homolog 1	906	727	0.802	-0.318	0.00110035	0.0296985
ENSG00000120925	RNF170	ring finger protein 170	907	708	0.78	-0.359	0.000290378	0.0154202
ENSG00000121741	ZMYM2	zinc finger MYM-type containing 2	1475	1083	0.734	-0.445	0.00234523	0.043392
ENSG00000121989	ACVR2A	activin A receptor type 2A	1234	860	0.696	-0.524	0.000108585	0.00896974
ENSG00000122958	VPS26A	VPS26, retromer complex component A	1779	1265	0.711	-0.491	0.00233033	0.0432141
ENSG00000123200	ZC3H13	zinc finger CCCH-type containing 13	1617	1137	0.703	-0.508	0.00299466	0.0495756
ENSG00000123612	ACVR1C	activin A receptor type 1C	281	114	0.407	-1.297	0.000737665	0.0243722
ENSG00000123636	BAZ2B	bromodomain adjacent to zinc finger domain 2B	1350	897	0.664	-0.59	0.00180543	0.0380046
ENSG00000123739	PLA2G12A	phospholipase A2 group XIIA	1209	864	0.715	-0.484	0.00198954	0.0396841
ENSG00000123836	PFKFB2	6-phosphofructo-2-kinase/fructose-2,6-biphosphatase 2	2489	1542	0.62	-0.69	0.00116908	0.0306926
ENSG00000124279	FASTKD3	FAST kinase domains 3	337	225	0.667	-0.584	0.000855219	0.0261457
ENSG00000124406	ATP8A1	ATPase phospholipid transporting 8A1	2834	1697	0.599	-0.74	0.000119694	0.00954986
ENSG00000125255	SLC10A2	solute carrier family 10 member 2	11968	6671	0.557	-0.843	8.58e-06	0.00216006
ENSG00000125633	CCDC93	coiled-coil domain containing 93	1257	903	0.719	-0.476	0.0013702	0.0327635
ENSG00000125676	THOC2	THO complex 2	1528	1049	0.687	-0.542	0.000864522	0.0262828
ENSG00000125845	BMP2	bone morphogenetic protein 2	451	284	0.629	-0.669	0.00149137	0.0345697
ENSG00000125945	ZNF436	zinc finger protein 436	480	302	0.628	-0.671	0.00107539	0.029479
ENSG00000126773	PCNX4	pecanex homolog 4	813	578	0.712	-0.49	0.000589021	0.0216983
ENSG00000127324	TSPAN8	tetraspanin 8	27527	21747	0.79	-0.34	0.00232369	0.0431399
ENSG00000127328	RAB3IP	RAB3A interacting protein	1094	737	0.673	-0.57	0.00098196	0.0276913
ENSG00000127334	DYRK2	dual specificity tyrosine phosphorylation regulated kinase 2	5546	3435	0.619	-0.691	0.000132074	0.0102379
ENSG00000127914	AKAP9	A-kinase anchoring protein 9	6395	3646	0.57	-0.811	0.00163136	0.0360088
ENSG00000128585	MKLN1	muskelin 1	1808	1299	0.718	-0.478	0.00268284	0.0462875
ENSG00000128607	KLHDC10	kelch domain containing 10	788	571	0.725	-0.464	0.00202515	0.0399248
ENSG00000128923	MINDY2	MINDY lysine 48 deubiquitinase 2	560	414	0.74	-0.434	0.00203611	0.0399248
ENSG00000129292	PHF20L1	PHD finger protein 20 like 1	986	723	0.733	-0.448	0.00235167	0.0434129
ENSG00000129315	CCNT1	cyclin T1	1006	651	0.647	-0.628	0.000274444	0.0150127
ENSG00000129422	MTUS1	microtubule associated scaffold protein 1	2840	2080	0.732	-0.45	0.00222438	0.0419898
ENSG00000129472	RAB2B	RAB2B, member RAS oncogene family	660	452	0.686	-0.544	0.000439724	0.0187295
ENSG00000131724	IL13RA1	interleukin 13 receptor subunit alpha 1	6014	4361	0.725	-0.464	9.85e-06	0.00233556
ENSG00000131781	FMO5	flavin containing monooxygenase 5	4762	2887	0.606	-0.721	0.000151481	0.0109147
ENSG00000132170	PPARG	peroxisome proliferator activated receptor gamma	598	425	0.709	-0.495	0.000836082	0.0258506
ENSG00000132356	PRKAA1	protein kinase AMP-activated catalytic subunit alpha 1	2606	1781	0.684	-0.549	0.000763218	0.0249238
ENSG00000132466	ANKRD17	ankyrin repeat domain 17	2088	1434	0.687	-0.542	0.00300771	0.0497412
ENSG00000132485	ZRANB2	zinc finger RANBP2-type containing 2	2194	1545	0.704	-0.506	0.00228911	0.0427914
ENSG00000133794	ARNTL	aryl hydrocarbon receptor nuclear translocator like	341	218	0.638	-0.649	0.00176309	0.0375126
ENSG00000134215	VAV3	vav guanine nucleotide exchange factor 3	1637	1094	0.668	-0.582	0.000377321	0.0173493
ENSG00000134313	KIDINS220	kinase D interacting substrate 220	1401	1004	0.717	-0.48	0.00278633	0.0476707
ENSG00000134318	ROCK2	Rho associated coiled-coil containing protein kinase 2	2644	1705	0.645	-0.632	0.00162544	0.0359753
ENSG00000134444	KIAA1468	KIAA1468	1130	813	0.719	-0.476	0.000470835	0.0193492
ENSG00000134709	HOOK1	hook microtubule tethering protein 1	2477	1541	0.622	-0.686	0.000495178	0.0200971
ENSG00000135093	USP30	ubiquitin specific peptidase 30	393	306	0.778	-0.363	0.00293435	0.0491988
ENSG00000135317	SNX14	sorting nexin 14	1478	1172	0.793	-0.335	0.00181557	0.0381691
ENSG00000135362	PRR5L	proline rich 5 like	729	538	0.739	-0.437	0.00230348	0.0430088
ENSG00000135535	CD164	CD164 molecule	21766	15830	0.727	-0.459	0.000260882	0.0149523
ENSG00000135540	NHSL1	NHS like 1	4057	3184	0.785	-0.35	0.00262558	0.0460169
ENSG00000135655	USP15	ubiquitin specific peptidase 15	1328	979	0.737	-0.44	0.000410985	0.0182613
ENSG00000135837	CEP350	centrosomal protein 350	3237	2033	0.628	-0.671	0.000263685	0.0150045
ENSG00000135870	RC3H1	ring finger and CCCH-type domains 1	1449	1044	0.721	-0.473	0.00236518	0.043515
ENSG00000135945	REV1	REV1, DNA directed polymerase	906	652	0.719	-0.476	0.00183387	0.0383564
ENSG00000136052	SLC41A2	solute carrier family 41 member 2	2234	1583	0.709	-0.497	0.00112135	0.029802
ENSG00000136153	LMO7	LIM domain 7	5035	3775	0.75	-0.416	0.0029275	0.0491988
ENSG00000136237	RAPGEF5	Rap guanine nucleotide exchange factor 5	1048	669	0.639	-0.647	0.000248224	0.014397
ENSG00000136381	IREB2	iron responsive element binding protein 2	2387	1577	0.661	-0.598	0.00061531	0.021996
ENSG00000136492	BRIP1	BRCA1 interacting protein C-terminal helicase 1	171	108	0.631	-0.665	0.000304655	0.015719
ENSG00000136709	WDR33	WD repeat domain 33	1131	888	0.785	-0.349	0.000507014	0.0204372
ENSG00000136925	TSTD2	thiosulfate sulfurtransferase like domain containing 2	445	320	0.717	-0.479	0.000581662	0.0215976
ENSG00000136935	GOLGA1	golgin A1	501	359	0.717	-0.48	0.0029809	0.049498
ENSG00000137145	DENND4C	DENN domain containing 4C	2273	1358	0.598	-0.742	0.00240355	0.0438755
ENSG00000137414	FAM8A1	family with sequence similarity 8 member A1	1681	1205	0.717	-0.48	0.000793066	0.0252362
ENSG00000137449	CPEB2	cytoplasmic polyadenylation element binding protein 2	1105	754	0.682	-0.553	0.000270245	0.0150127
ENSG00000137642	SORL1	sortilin related receptor 1	6578	4213	0.64	-0.643	0.00042174	0.0183946
ENSG00000137693	YAP1	Yes associated protein 1	2558	1762	0.689	-0.537	0.00239563	0.0438456
ENSG00000137752	CASP1	caspase 1	3088	2110	0.683	-0.549	0.00103132	0.0286874
ENSG00000137845	ADAM10	ADAM metallopeptidase domain 10	3377	2357	0.698	-0.519	0.0011224	0.029802
ENSG00000137872	SEMA6D	semaphorin 6D	3620	2330	0.643	-0.636	6.36e-05	0.00661796
ENSG00000137878	GCOM1	GRINL1A complex locus 1	71	32	0.456	-1.132	0.000303472	0.0157075
ENSG00000137960	GIPC2	GIPC PDZ domain containing family member 2	3667	2715	0.74	-0.434	0.00228752	0.0427914
ENSG00000138246	DNAJC13	DnaJ heat shock protein family (Hsp40) member C13	1500	1013	0.675	-0.567	0.000511019	0.0204858
ENSG00000138434	SSFA2	sperm specific antigen 2	4645	3305	0.712	-0.491	6.86e-05	0.00676636
ENSG00000138658	ZGRF1	zinc finger GRF-type containing 1	126	81	0.645	-0.632	0.00205926	0.0400492
ENSG00000138660	AP1AR	adaptor related protein complex 1 associated regulatory protein	1363	912	0.669	-0.579	0.00018936	0.0123887
ENSG00000138669	PRKG2	protein kinase, cGMP-dependent, type II	1927	1047	0.543	-0.881	0.000129268	0.0100681
ENSG00000138688	KIAA1109	KIAA1109	3085	1897	0.615	-0.701	0.000149254	0.0108497
ENSG00000139132	FGD4	FYVE, RhoGEF and PH domain containing 4	1689	1026	0.608	-0.719	0.000735619	0.0243722
ENSG00000139291	TMEM19	transmembrane protein 19	2333	1645	0.705	-0.504	0.00270655	0.0465828
ENSG00000139946	PELI2	pellino E3 ubiquitin protein ligase family member 2	1086	714	0.658	-0.604	0.000860161	0.0262477
ENSG00000140284	SLC27A2	solute carrier family 27 member 2	1781	1128	0.633	-0.659	0.000121978	0.00963803
ENSG00000140386	SCAPER	S-phase cyclin A associated protein in the ER	889	577	0.65	-0.622	5.12e-06	0.00155228
ENSG00000140563	MCTP2	multiple C2 and transmembrane domain containing 2	643	440	0.685	-0.545	0.000629133	0.0224185
ENSG00000141441	GAREM1	GRB2 associated regulator of MAPK1 subtype 1	961	659	0.685	-0.545	0.000357891	0.0169181
ENSG00000141446	ESCO1	establishment of sister chromatid cohesion N-acetyltransferase 1	593	426	0.717	-0.48	0.00225118	0.0423709
ENSG00000141646	SMAD4	SMAD family member 4	1970	1603	0.814	-0.297	0.000167941	0.0113896
ENSG00000143079	CTTNBP2NL	CTTNBP2 N-terminal like	694	476	0.686	-0.544	0.000283077	0.0153821
ENSG00000144036	EXOC6B	exocyst complex component 6B	1553	1070	0.689	-0.538	0.00106538	0.0293356
ENSG00000144136	SLC20A1	solute carrier family 20 member 1	1727	1193	0.691	-0.534	0.00226	0.0424392
ENSG00000144366	GULP1	GULP, engulfment adaptor PTB domain containing 1	866	548	0.632	-0.662	0.000954211	0.0274773
ENSG00000144426	NBEAL1	neurobeachin like 1	1258	649	0.515	-0.956	1.83e-05	0.0029951
ENSG00000144820	ADGRG7	adhesion G protein-coupled receptor G7	3475	2201	0.633	-0.659	1.16e-05	0.00253256
ENSG00000145012	LPP	LIM domain containing preferred translocation partner in lipoma	5253	3134	0.597	-0.745	0.000286881	0.0153843
ENSG00000145349	CAMK2D	calcium/calmodulin dependent protein kinase II delta	2076	1531	0.738	-0.439	0.000213287	0.0132914
ENSG00000145390	USP53	ubiquitin specific peptidase 53	1120	771	0.688	-0.539	0.00205089	0.0399338
ENSG00000145476	CYP4V2	cytochrome P450 family 4 subfamily V member 2	2903	2023	0.697	-0.521	0.000349584	0.0168667
ENSG00000145495	2006-03-01	membrane associated ring-CH-type finger 6	4908	3404	0.693	-0.528	2.48e-06	0.00101972
ENSG00000146039	SLC17A4	solute carrier family 17 member 4	3337	1857	0.556	-0.846	1.81e-05	0.00299453
ENSG00000146350	TBC1D32	TBC1 domain family member 32	231	144	0.623	-0.682	0.00173663	0.0371783
ENSG00000146426	TIAM2	T-cell lymphoma invasion and metastasis 2	475	340	0.719	-0.476	0.00131246	0.0320177
ENSG00000146587	RBAK	RB associated KRAB zinc finger	498	350	0.701	-0.512	0.00264006	0.0460169
ENSG00000146802	TMEM168	transmembrane protein 168	1078	750	0.696	-0.524	0.00222837	0.0419898
ENSG00000146872	TLK2	tousled like kinase 2	697	559	0.803	-0.317	0.000932597	0.0270163
ENSG00000147050	KDM6A	lysine demethylase 6A	1508	918	0.609	-0.715	3.31e-05	0.00445452
ENSG00000147364	FBXO25	F-box protein 25	564	424	0.753	-0.41	0.00166153	0.036412
ENSG00000147459	DOCK5	dedicator of cytokinesis 5	3795	2350	0.619	-0.691	1.56e-05	0.00286774
ENSG00000148187	MRRF	mitochondrial ribosome recycling factor	976	703	0.721	-0.472	0.000314769	0.015981
ENSG00000148584	A1CF	APOBEC1 complementation factor	4430	2812	0.635	-0.656	0.000193983	0.0126115
ENSG00000148700	ADD3	adducin 3	5467	3396	0.621	-0.687	0.000787942	0.0251719
ENSG00000148942	SLC5A12	solute carrier family 5 member 12	10905	6367	0.584	-0.776	0.00180489	0.0380046
ENSG00000149289	ZC3H12C	zinc finger CCCH-type containing 12C	658	374	0.568	-0.817	2.81e-05	0.00402535
ENSG00000150477	KIAA1328	KIAA1328	157	96	0.614	-0.703	0.000609855	0.021996
ENSG00000150527	CTAGE5	CTAGE family member 5, ER export factor	6142	4154	0.676	-0.564	0.0008216	0.0255812
ENSG00000151292	CSNK1G3	casein kinase 1 gamma 3	1256	933	0.743	-0.429	0.00107818	0.0294895
ENSG00000151320	AKAP6	A-kinase anchoring protein 6	130	77	0.59	-0.76	0.00285676	0.0483698
ENSG00000151332	MBIP	MAP3K12 binding inhibitory protein 1	361	285	0.79	-0.341	0.00213165	0.041018
ENSG00000151458	ANKRD50	ankyrin repeat domain 50	627	353	0.563	-0.829	0.00215817	0.0412371
ENSG00000151623	NR3C2	nuclear receptor subfamily 3 group C member 2	1996	1316	0.659	-0.601	0.00139175	0.0330767
ENSG00000151657	KIN	Kin17 DNA and RNA binding protein	327	257	0.786	-0.347	0.0016021	0.0356049
ENSG00000151715	TMEM45B	transmembrane protein 45B	5852	4622	0.79	-0.34	0.00128704	0.0317032
ENSG00000151806	GUF1	GUF1 homolog, GTPase	765	584	0.763	-0.391	0.00196395	0.0395828
ENSG00000152332	UHMK1	U2AF homology motif kinase 1	5394	3620	0.671	-0.576	0.000270774	0.0150127
ENSG00000152785	BMP3	bone morphogenetic protein 3	802	441	0.55	-0.864	0.00264994	0.0460949
ENSG00000153214	TMEM87B	transmembrane protein 87B	2651	1863	0.703	-0.509	0.00172786	0.0371365
ENSG00000153246	PLA2R1	phospholipase A2 receptor 1	1278	729	0.57	-0.81	0.00121822	0.0311915
ENSG00000153707	PTPRD	protein tyrosine phosphatase, receptor type D	1754	1115	0.635	-0.654	0.00239118	0.0438455
ENSG00000153721	CNKSR3	CNKSR family member 3	2140	1483	0.693	-0.529	0.0025206	0.0451191
ENSG00000153922	CHD1	chromodomain helicase DNA binding protein 1	1086	717	0.66	-0.599	0.00157191	0.0355112
ENSG00000153936	HS2ST1	heparan sulfate 2-O-sulfotransferase 1	934	638	0.683	-0.549	0.000352361	0.016916
ENSG00000154263	ABCA10	ATP binding cassette subfamily A member 10	339	199	0.586	-0.771	0.000974082	0.0276913
ENSG00000154265	ABCA5	ATP binding cassette subfamily A member 5	3748	2499	0.667	-0.585	0.00296446	0.0494068
ENSG00000154305	MIA3	MIA family member 3, ER export factor	2456	1798	0.732	-0.45	0.00133762	0.0323641
ENSG00000154447	SH3RF1	SH3 domain containing ring finger 1	1111	727	0.655	-0.611	0.000540407	0.0210296
ENSG00000154639	CXADR	CXADR, Ig-like cell adhesion molecule	3398	2256	0.664	-0.591	4.33e-06	0.00147688
ENSG00000155545	MIER3	MIER family member 3	2543	1666	0.655	-0.611	0.00069999	0.0237601
ENSG00000155744	FAM126B	family with sequence similarity 126 member B	1997	1350	0.676	-0.565	0.00293712	0.0491988
ENSG00000155846	PPARGC1B	PPARG coactivator 1 beta	792	466	0.589	-0.764	1.17e-06	0.000684752
ENSG00000155850	SLC26A2	solute carrier family 26 member 2	8563	4945	0.577	-0.792	0.000761406	0.0249238
ENSG00000155858	LSM11	LSM11, U7 small nuclear RNA associated	207	129	0.625	-0.678	0.000656877	0.0228825
ENSG00000156052	GNAQ	G protein subunit alpha q	2272	1653	0.728	-0.458	0.00135771	0.0326049
ENSG00000156273	BACH1	BTB domain and CNC homolog 1	2284	1621	0.71	-0.495	0.00216804	0.0412981
ENSG00000156284	CLDN8	claudin 8	250	69	0.276	-1.858	0.000815406	0.0254859
ENSG00000156463	SH3RF2	SH3 domain containing ring finger 2	1098	824	0.751	-0.413	0.000508585	0.0204384
ENSG00000157106	SMG1	SMG1, nonsense mediated mRNA decay associated PI3K related kinase	4145	2812	0.678	-0.56	0.000268844	0.0150127
ENSG00000157212	PAXIP1	PAX interacting protein 1	244	173	0.712	-0.49	0.000488018	0.0199053
ENSG00000157224	CLDN12	claudin 12	1510	1087	0.72	-0.474	0.00182552	0.0382781
ENSG00000157388	CACNA1D	calcium voltage-gated channel subunit alpha1 D	343	217	0.634	-0.657	0.00179533	0.0379174
ENSG00000157500	APPL1	adaptor protein, phosphotyrosine interacting with PH domain and leucine zipper 1	2277	1584	0.695	-0.524	0.00253237	0.0451191
ENSG00000157625	TAB3	TGF-beta activated kinase 1 and MAP3K7 binding protein 3	782	557	0.712	-0.49	0.000972995	0.0276913
ENSG00000157764	BRAF	B-Raf proto-oncogene, serine/threonine kinase	915	610	0.667	-0.584	0.00110024	0.0296985
ENSG00000159082	SYNJ1	synaptojanin 1	437	261	0.596	-0.747	1.4e-05	0.00274759
ENSG00000159086	PAXBP1	PAX3 and PAX7 binding protein 1	1125	697	0.62	-0.69	0.00094434	0.027241
ENSG00000159140	SON	SON DNA binding protein	5644	4070	0.721	-0.472	0.00166314	0.036412
ENSG00000159256	MORC3	MORC family CW-type zinc finger 3	840	645	0.768	-0.381	0.00243943	0.0443325
ENSG00000159459	UBR1	ubiquitin protein ligase E3 component n-recognin 1	953	626	0.657	-0.606	0.0010809	0.0295144
ENSG00000159658	EFCAB14	EF-hand calcium binding domain 14	3229	2457	0.761	-0.394	0.00193843	0.0393361
ENSG00000160352	ZNF714	zinc finger protein 714	226	108	0.477	-1.069	0.000960169	0.0275035
ENSG00000161048	NAPEPLD	N-acyl phosphatidylethanolamine phospholipase D	2212	1387	0.627	-0.674	0.000876793	0.0265601
ENSG00000162601	MYSM1	Myb like, SWIRM and MPN domains 1	1196	798	0.667	-0.583	0.00231194	0.0430194
ENSG00000162695	SLC30A7	solute carrier family 30 member 7	1092	832	0.762	-0.393	0.000186282	0.0122362
ENSG00000162819	BROX	BRO1 domain and CAAX motif containing	2265	1732	0.764	-0.388	0.000642258	0.0226013
ENSG00000163072	NOSTRIN	nitric oxide synthase trafficking	1004	693	0.69	-0.536	6.31e-05	0.00661796
ENSG00000163235	TGFA	transforming growth factor alpha	751	536	0.714	-0.485	0.00185203	0.038486
ENSG00000163251	FZD5	frizzled class receptor 5	2396	1450	0.605	-0.724	6.73e-05	0.00672687
ENSG00000163412	EIF4E3	eukaryotic translation initiation factor 4E family member 3	2985	2234	0.748	-0.418	0.000583648	0.0215976
ENSG00000163558	PRKCI	protein kinase C iota	885	583	0.658	-0.603	4.56e-05	0.0051965
ENSG00000163635	ATXN7	ataxin 7	1059	736	0.695	-0.526	0.000615931	0.021996
ENSG00000163660	CCNL1	cyclin L1	3067	2130	0.695	-0.525	0.00174566	0.0373229
ENSG00000163694	RBM47	RNA binding motif protein 47	6855	5070	0.739	-0.435	0.000977129	0.0276913
ENSG00000163714	U2SURP	U2 snRNP associated SURP domain containing	1745	1213	0.695	-0.524	0.00203868	0.0399248
ENSG00000163743	RCHY1	ring finger and CHY zinc finger domain containing 1	609	459	0.754	-0.408	0.00255463	0.0453956
ENSG00000163935	SFMBT1	Scm-like with four mbt domains 1	309	203	0.658	-0.604	0.00144595	0.0338339
ENSG00000164023	SGMS2	sphingomyelin synthase 2	2269	1473	0.649	-0.624	0.00170813	0.0368577
ENSG00000164024	METAP1	methionyl aminopeptidase 1	909	703	0.773	-0.372	0.000285828	0.0153843
ENSG00000164073	MFSD8	major facilitator superfamily domain containing 8	790	556	0.704	-0.506	1.96e-05	0.00317943
ENSG00000164080	RAD54L2	RAD54 like 2 (S. cerevisiae)	641	485	0.757	-0.402	0.00292582	0.0491988
ENSG00000164124	TMEM144	transmembrane protein 144	1186	633	0.534	-0.905	3.33e-05	0.00445452
ENSG00000164164	OTUD4	OTU deubiquitinase 4	1334	929	0.696	-0.522	0.000168727	0.0113896
ENSG00000164187	LMBRD2	LMBR1 domain containing 2	1060	632	0.596	-0.746	0.000164697	0.0113662
ENSG00000164270	HTR4	5-hydroxytryptamine receptor 4	222	116	0.524	-0.933	0.00265477	0.0460949
ENSG00000164327	RICTOR	RPTOR independent companion of MTOR complex 2	857	595	0.695	-0.525	0.0015755	0.0355183
ENSG00000164329	PAPD4	poly(A) RNA polymerase D4, non-canonical	1053	812	0.771	-0.376	0.000822678	0.0255812
ENSG00000164463	CREBRF	CREB3 regulatory factor	1194	822	0.688	-0.539	0.000560415	0.0212044
ENSG00000164576	SAP30L	SAP30 like	2070	1545	0.746	-0.422	0.00132224	0.0321346
ENSG00000164631	ZNF12	zinc finger protein 12	705	513	0.728	-0.459	0.0011929	0.0308231
ENSG00000164749	HNF4G	hepatocyte nuclear factor 4 gamma	14525	8403	0.578	-0.79	0.000708405	0.0239095
ENSG00000164983	TMEM65	transmembrane protein 65	589	353	0.6	-0.737	1.65e-05	0.0028953
ENSG00000165219	GAPVD1	GTPase activating protein and VPS9 domains 1	962	739	0.768	-0.381	0.00203619	0.0399248
ENSG00000165813	CCDC186	coiled-coil domain containing 186	2311	1491	0.645	-0.632	0.00298896	0.0495695
ENSG00000165895	ARHGAP42	Rho GTPase activating protein 42	523	303	0.579	-0.788	0.00249307	0.0448386
ENSG00000165995	CACNB2	calcium voltage-gated channel auxiliary subunit beta 2	378	258	0.68	-0.556	0.00262883	0.0460169
ENSG00000166068	SPRED1	sprouty related EVH1 domain containing 1	1523	949	0.623	-0.682	0.000934939	0.0270174
ENSG00000166135	HIF1AN	hypoxia inducible factor 1 alpha subunit inhibitor	1948	1581	0.811	-0.301	0.000967216	0.027657
ENSG00000166266	CUL5	cullin 5	1134	734	0.647	-0.628	0.000561807	0.0212044
ENSG00000166326	TRIM44	tripartite motif containing 44	1867	1362	0.73	-0.454	0.00170562	0.0368522
ENSG00000166479	TMX3	thioredoxin related transmembrane protein 3	1283	873	0.681	-0.554	0.000980303	0.0276913
ENSG00000166510	CCDC68	coiled-coil domain containing 68	1828	1239	0.678	-0.561	8.86e-06	0.00219478
ENSG00000166579	NDEL1	nudE neurodevelopment protein 1 like 1	546	407	0.746	-0.423	0.00154997	0.0352102
ENSG00000166747	AP1G1	adaptor related protein complex 1 gamma 1 subunit	2889	2216	0.767	-0.383	0.00241031	0.0439009
ENSG00000166912	MTMR10	myotubularin related protein 10	914	634	0.694	-0.527	0.000435557	0.0186492
ENSG00000167555	ZNF528	zinc finger protein 528	339	214	0.632	-0.663	0.00200243	0.0398441
ENSG00000167562	ZNF701	zinc finger protein 701	320	230	0.717	-0.48	0.000416992	0.018285
ENSG00000168216	LMBRD1	LMBR1 domain containing 1	2828	2028	0.717	-0.48	0.000169214	0.0113896
ENSG00000168538	TRAPPC11	trafficking protein particle complex 11	805	571	0.709	-0.497	0.000981755	0.0276913
ENSG00000168769	TET2	tet methylcytosine dioxygenase 2	989	637	0.644	-0.635	1.08e-06	0.000676616
ENSG00000168772	CXXC4	CXXC finger protein 4	292	185	0.633	-0.66	0.00117464	0.030698
ENSG00000168813	ZNF507	zinc finger protein 507	891	590	0.662	-0.595	0.000112486	0.00922366
ENSG00000168939	SPRY3	sprouty RTK signaling antagonist 3	71	44	0.62	-0.689	0.00056005	0.0212044
ENSG00000168944	CEP120	centrosomal protein 120	619	454	0.733	-0.448	0.0002299	0.0138244
ENSG00000169641	LUZP1	leucine zipper protein 1	2995	1973	0.659	-0.602	0.00285086	0.0483199
ENSG00000169967	MAP3K2	mitogen-activated protein kinase kinase kinase 2	4447	3039	0.683	-0.549	0.000315594	0.015981
ENSG00000170385	SLC30A1	solute carrier family 30 member 1	3675	2303	0.627	-0.674	0.000181297	0.0119568
ENSG00000171365	CLCN5	chloride voltage-gated channel 5	1519	828	0.546	-0.874	1.78e-11	2.92e-07
ENSG00000171469	ZNF561	zinc finger protein 561	597	450	0.754	-0.406	0.00236439	0.043515
ENSG00000171566	PLRG1	pleiotropic regulator 1	1141	835	0.732	-0.451	0.000331505	0.0163316
ENSG00000172159	FRMD3	FERM domain containing 3	1499	931	0.621	-0.688	0.000121243	0.00962642
ENSG00000172292	CERS6	ceramide synthase 6	3882	2628	0.677	-0.563	0.00110745	0.0297429
ENSG00000172296	SPTLC3	serine palmitoyltransferase long chain base subunit 3	605	398	0.657	-0.606	0.000782857	0.0251719
ENSG00000172466	ZNF24	zinc finger protein 24	2110	1511	0.716	-0.482	0.000387857	0.0176216
ENSG00000172493	AFF1	AF4/FMR2 family member 1	2705	1764	0.652	-0.616	0.00168121	0.0365662
ENSG00000172572	PDE3A	phosphodiesterase 3A	975	517	0.53	-0.915	4.5e-05	0.00518083
ENSG00000172939	OXSR1	oxidative stress responsive 1	1301	1024	0.788	-0.343	0.00283558	0.0481916
ENSG00000172955	ADH6	alcohol dehydrogenase 6 (class V)	1260	784	0.622	-0.685	0.00023457	0.0138885
ENSG00000173166	RAPH1	Ras association (RalGDS/AF-6) and pleckstrin homology domains 1	2030	1267	0.624	-0.68	8.61e-07	0.00061216
ENSG00000173230	GOLGB1	golgin B1	3738	2601	0.695	-0.524	0.000140333	0.0105508
ENSG00000173273	TNKS	tankyrase	1164	863	0.741	-0.433	0.000708981	0.0239095
ENSG00000173276	ZBTB21	zinc finger and BTB domain containing 21	409	287	0.702	-0.511	0.00148012	0.0344655
ENSG00000173406	DAB1	DAB1, reelin adaptor protein	1779	1268	0.712	-0.489	0.00122458	0.0311915
ENSG00000173559	NABP1	nucleic acid binding protein 1	2885	1742	0.604	-0.728	0.000844715	0.0260191
ENSG00000174373	RALGAPA1	Ral GTPase activating protein catalytic alpha subunit 1	884	563	0.637	-0.651	0.000891498	0.0267547
ENSG00000174720	LARP7	La ribonucleoprotein domain family member 7	1182	890	0.753	-0.409	0.00267683	0.0462326
ENSG00000174796	THAP6	THAP domain containing 6	464	327	0.706	-0.502	0.0024878	0.0448386
ENSG00000174808	BTC	betacellulin	101	64	0.634	-0.656	0.00139741	0.0330767
ENSG00000175104	TRAF6	TNF receptor associated factor 6	432	269	0.624	-0.681	0.000158786	0.0111464
ENSG00000175164	ABO	ABO, alpha 1-3-N-acetylgalactosaminyltransferase and alpha 1-3-galactosyltransferase	2637	1595	0.605	-0.726	0.000614636	0.021996
ENSG00000175455	CCDC14	coiled-coil domain containing 14	968	647	0.668	-0.582	0.00137215	0.0327635
ENSG00000175893	ZDHHC21	zinc finger DHHC-type containing 21	1562	989	0.633	-0.659	1.67e-05	0.0028953
ENSG00000176542	USF3	upstream transcription factor family member 3	1081	729	0.675	-0.568	0.00252983	0.0451191
ENSG00000176623	RMDN1	regulator of microtubule dynamics 1	1063	829	0.78	-0.359	0.00123765	0.0313846
ENSG00000176771	NCKAP5	NCK associated protein 5	330	222	0.671	-0.576	0.000916136	0.0268665
ENSG00000177054	ZDHHC13	zinc finger DHHC-type containing 13	416	307	0.739	-0.436	0.00161452	0.035782
ENSG00000177359	AC024940.1		304	155	0.51	-0.971	4.91e-05	0.00546325
ENSG00000177425	PAWR	pro-apoptotic WT1 regulator	1310	989	0.756	-0.404	0.00236968	0.0435489
ENSG00000177707	NECTIN3	nectin cell adhesion molecule 3	1149	757	0.659	-0.602	0.00296961	0.0494068
ENSG00000177853	ZNF518A	zinc finger protein 518A	1221	788	0.645	-0.632	0.00113065	0.0298755
ENSG00000178904	DPY19L3	dpy-19 like 3 (C. elegans)	552	378	0.684	-0.548	0.000273361	0.0150127
ENSG00000179454	KLHL28	kelch like family member 28	780	495	0.634	-0.656	0.000414271	0.0182613
ENSG00000180011	ZADH2	zinc binding alcohol dehydrogenase domain containing 2	1190	866	0.728	-0.457	9.53e-05	0.00826811
ENSG00000180182	MED14	mediator complex subunit 14	1743	1219	0.699	-0.516	0.00143513	0.0337255
ENSG00000180263	FGD6	FYVE, RhoGEF and PH domain containing 6	771	552	0.718	-0.478	0.00167344	0.0364944
ENSG00000180488	MIGA1	mitoguardin 1	1640	1098	0.67	-0.579	0.00155426	0.0352587
ENSG00000180628	PCGF5	polycomb group ring finger 5	3594	2582	0.718	-0.477	0.000798601	0.0253629
ENSG00000180917	CMTR2	cap methyltransferase 2	1405	979	0.697	-0.521	9.32e-05	0.0081998
ENSG00000181016	LSMEM1	leucine rich single-pass membrane protein 1	228	136	0.596	-0.747	0.00277678	0.0475571
ENSG00000181634	TNFSF15	TNF superfamily member 15	1631	752	0.461	-1.116	0.000309584	0.0158236
ENSG00000183023	SLC8A1	solute carrier family 8 member A1	1050	567	0.54	-0.89	0.000326998	0.0162505
ENSG00000183354	KIAA2026	KIAA2026	572	381	0.666	-0.587	6.1e-05	0.00656378
ENSG00000183530	PRR14L	proline rich 14 like	1393	964	0.692	-0.532	0.000789507	0.0251719
ENSG00000183742	MACC1	MACC1, MET transcriptional regulator	3062	1928	0.629	-0.668	0.000922849	0.0269173
ENSG00000183778	B3GALT5	beta-1,3-galactosyltransferase 5	7904	5325	0.674	-0.57	4.02e-05	0.00501717
ENSG00000184313	MROH7	maestro heat like repeat family member 7	153	69	0.453	-1.143	0.0021102	0.040749
ENSG00000184434	LRRC19	leucine rich repeat containing 19	6276	4064	0.648	-0.627	0.000789199	0.0251719
ENSG00000185591	SP1	Sp1 transcription factor	3334	2556	0.767	-0.383	0.000503417	0.0203809
ENSG00000185630	PBX1	PBX homeobox 1	1513	1038	0.686	-0.544	0.000264202	0.0150045
ENSG00000185658	BRWD1	bromodomain and WD repeat domain containing 1	1772	1185	0.669	-0.58	0.000211541	0.0132914
ENSG00000185716	C16orf52	chromosome 16 open reading frame 52	254	187	0.736	-0.442	0.00252854	0.0451191
ENSG00000186314	PRELID2	PRELI domain containing 2	780	533	0.683	-0.55	0.00160233	0.0356049
ENSG00000186472	PCLO	piccolo presynaptic cytomatrix protein	480	221	0.46	-1.121	4.85e-06	0.00153764
ENSG00000186660	ZFP91	ZFP91 zinc finger protein	2517	1848	0.734	-0.446	0.00239655	0.0438456
ENSG00000186814	ZSCAN30	zinc finger and SCAN domain containing 30	634	423	0.669	-0.58	2.49e-06	0.00101972
ENSG00000186951	PPARA	peroxisome proliferator activated receptor alpha	2940	2038	0.693	-0.529	0.00127439	0.0315867
ENSG00000187210	GCNT1	glucosaminyl (N-acetyl) transferase 1, core 2	3874	2401	0.62	-0.69	0.00204819	0.0399335
ENSG00000187605	TET3	tet methylcytosine dioxygenase 3	976	663	0.679	-0.558	0.000635914	0.0225872
ENSG00000188167	TMPPE	transmembrane protein with metallophosphoesterase domain	64	35	0.55	-0.862	0.00198654	0.0396753
ENSG00000188211	NCR3LG1	natural killer cell cytotoxicity receptor 3 ligand 1	281	131	0.467	-1.1	0.000601108	0.0218969
ENSG00000188647	PTAR1	protein prenyltransferase alpha subunit repeat containing 1	1049	648	0.617	-0.696	0.000406973	0.018187
ENSG00000188761	BCL2L15	BCL2 like 15	7446	4734	0.636	-0.653	0.00111156	0.029802
ENSG00000188811	NHLRC3	NHL repeat containing 3	770	525	0.682	-0.553	0.00125716	0.0314781
ENSG00000188994	ZNF292	zinc finger protein 292	2070	1383	0.668	-0.582	0.0024597	0.0445892
ENSG00000189079	ARID2	AT-rich interaction domain 2	760	528	0.694	-0.528	0.000414926	0.0182613
ENSG00000189157	FAM47E	family with sequence similarity 47 member E	163	81	0.493	-1.021	3.5e-08	7.94e-05
ENSG00000189221	MAOA	monoamine oxidase A	22745	13800	0.607	-0.721	0.00130301	0.0318629
ENSG00000196233	LCOR	ligand dependent nuclear receptor corepressor	5068	2972	0.587	-0.77	4.32e-06	0.00147688
ENSG00000196549	MME	membrane metalloendopeptidase	35997	22530	0.626	-0.676	0.00066034	0.0228825
ENSG00000196678	ERI2	ERI1 exoribonuclease family member 2	458	311	0.68	-0.556	0.00036568	0.017187
ENSG00000197323	TRIM33	tripartite motif containing 33	978	670	0.686	-0.545	0.00059891	0.0218656
ENSG00000197594	ENPP1	ectonucleotide pyrophosphatase/phosphodiesterase 1	545	389	0.713	-0.488	0.00188464	0.0387739
ENSG00000197601	FAR1	fatty acyl-CoA reductase 1	1822	1250	0.686	-0.544	0.000477248	0.0195636
ENSG00000198060	2005-03-01	membrane associated ring-CH-type finger 5	903	686	0.759	-0.397	0.000896323	0.0268012
ENSG00000198087	CD2AP	CD2 associated protein	8201	5417	0.66	-0.598	0.000458537	0.0191322
ENSG00000198142	SOWAHC	sosondowah ankyrin repeat domain family member C	551	378	0.686	-0.545	0.000234141	0.0138885
ENSG00000198270	TMEM116	transmembrane protein 116	405	296	0.73	-0.454	0.000544309	0.0210377
ENSG00000198538	ZNF28	zinc finger protein 28	489	334	0.683	-0.549	0.00297143	0.0494068
ENSG00000198585	NUDT16	nudix hydrolase 16	3968	2849	0.718	-0.478	0.00219094	0.0415237
ENSG00000198689	SLC9A6	solute carrier family 9 member A6	1035	701	0.677	-0.563	0.000257051	0.014804
ENSG00000198718	TOGARAM1	TOG array regulator of axonemal microtubules 1	389	254	0.653	-0.614	0.000520529	0.0206645
ENSG00000198894	CIPC	CLOCK interacting pacemaker	599	432	0.722	-0.47	4.45e-05	0.00518083
ENSG00000203668	CHML	CHM like, Rab escort protein 2	490	301	0.614	-0.704	0.000168789	0.0113896
ENSG00000204120	GIGYF2	GRB10 interacting GYF protein 2	1795	1176	0.655	-0.611	0.000816496	0.0254859
ENSG00000204130	RUFY2	RUN and FYVE domain containing 2	309	234	0.758	-0.399	0.00118192	0.030698
ENSG00000204177	BMS1P1	BMS1, ribosome biogenesis factor pseudogene 1	740	428	0.579	-0.788	0.0010159	0.0283687
ENSG00000204614	TRIM40	tripartite motif containing 40	344	197	0.575	-0.799	0.000676586	0.0233958
ENSG00000204740	MALRD1	MAM and LDL receptor class A domain containing 1	4538	2637	0.581	-0.783	0.00263105	0.0460169
ENSG00000205213	LGR4	leucine rich repeat containing G protein-coupled receptor 4	3558	2380	0.669	-0.58	0.000686076	0.0235032
ENSG00000205808	PLPP6	phospholipid phosphatase 6	634	493	0.776	-0.365	0.00293114	0.0491988
ENSG00000213121	AL590867.1		14	6	0.386	-1.373	0.00191948	0.0390971
ENSG00000219481	NBPF1	NBPF member 1	1197	820	0.685	-0.546	0.00218541	0.0414671
ENSG00000223394	TRBV29OR9-2	T-cell receptor beta variable 29/OR9-2 (non-functional)	19	8	0.406	-1.3	0.00126316	0.0315424
ENSG00000224660	SH3BP5-AS1	SH3BP5 antisense RNA 1	255	171	0.669	-0.58	0.00167806	0.0365463
ENSG00000224984	AL512363.1		22	7	0.33	-1.599	0.000567895	0.0213039
ENSG00000227502	LINC01268	long intergenic non-protein coding RNA 1268	339	182	0.535	-0.902	1.05e-05	0.00239392
ENSG00000229331	GK-IT1	GK intronic transcript 1	37	17	0.451	-1.149	0.0028904	0.0487375
ENSG00000230551	AC021078.1		657	418	0.637	-0.651	0.00151973	0.0349112
ENSG00000230732	AC016949.1		47	25	0.524	-0.933	0.000430265	0.0186175
ENSG00000232040	ZBED9	zinc finger BED-type containing 9	31	9	0.304	-1.718	0.00030256	0.0157075
ENSG00000232994	RPL7P14	ribosomal protein L7 pseudogene 14	13	3	0.226	-2.145	0.000293775	0.0154575
ENSG00000234155	LINC02535	long intergenic non-protein coding RNA 2535	1576	428	0.272	-1.881	9.15e-06	0.00223317
ENSG00000234617	SNRK-AS1	SNRK antisense RNA 1	27	10	0.397	-1.334	0.00246449	0.0445892
ENSG00000236682	AC068282.1		42	10	0.233	-2.101	0.000973519	0.0276913
ENSG00000237269	RBMY2TP	RNA binding motif protein, Y-linked, family 2, member T pseudogene	33	15	0.453	-1.142	0.00186124	0.038486
ENSG00000239305	RNF103	ring finger protein 103	2379	1698	0.714	-0.487	0.00058157	0.0215976
ENSG00000240891	PLCXD2	phosphatidylinositol specific phospholipase C X domain containing 2	296	195	0.657	-0.605	0.00213544	0.0410425
ENSG00000241860	AL627309.5		284	145	0.513	-0.963	0.000412131	0.0182613
ENSG00000242193	AL359075.1		771	516	0.669	-0.58	0.00163989	0.0360996
ENSG00000245958	AC093752.1		309	208	0.672	-0.573	0.00059446	0.0218104
ENSG00000246082	NUDT16P1	nudix hydrolase 16 pseudogene 1	300	197	0.658	-0.604	0.00169809	0.036738
ENSG00000250137	AC093607.1		190	39	0.206	-2.276	0.00203612	0.0399248
ENSG00000251429	AC098679.3		55	22	0.401	-1.318	0.00196824	0.0395828
ENSG00000253352	TUG1	taurine up-regulated 1 (non-protein coding)	2894	2179	0.753	-0.409	0.000134	0.0102897
ENSG00000253598	SLC10A5	solute carrier family 10 member 5	192	91	0.477	-1.067	0.000352814	0.016916
ENSG00000254154	AL359075.2		56	26	0.457	-1.13	0.00191033	0.0390375
ENSG00000254290	AC124067.4		185	100	0.54	-0.889	0.00125214	0.0314196
ENSG00000254418	SPON1-AS1	SPON1 antisense RNA 1	29	11	0.388	-1.367	0.000426013	0.0185316
ENSG00000254685	FPGT	fucose-1-phosphate guanylyltransferase	533	348	0.652	-0.618	0.00034387	0.0167391
ENSG00000256043	CTSO	cathepsin O	1528	1117	0.731	-0.452	0.000357341	0.0169181
ENSG00000256683	ZNF350	zinc finger protein 350	338	263	0.775	-0.367	0.000445479	0.018925
ENSG00000256870	SLC5A8	solute carrier family 5 member 8	18	5	0.31	-1.69	0.00169195	0.0366966
ENSG00000257298	AC008147.2		95	53	0.557	-0.845	0.000815739	0.0254859
ENSG00000257335	MGAM	maltase-glucoamylase	40569	29871	0.736	-0.442	0.0015988	0.0356049
ENSG00000257743	MGAM2	maltase-glucoamylase 2 (putative)	1882	874	0.464	-1.106	0.000764629	0.0249238
ENSG00000258441	LINC00641	long intergenic non-protein coding RNA 641	140	89	0.639	-0.645	0.00111336	0.029802
ENSG00000259366	AC108449.2		66	28	0.422	-1.243	0.000735323	0.0243722
ENSG00000260528	FAM157C	family with sequence similarity 157 member C (non-protein coding)	19	6	0.327	-1.613	0.000922945	0.0269173
ENSG00000260552	AC023043.1		181	119	0.657	-0.607	0.0014522	0.0339316
ENSG00000260766	AL513302.2		136	82	0.605	-0.725	0.00118923	0.030777
ENSG00000266651	AC093484.5		34	18	0.507	-0.981	0.00163655	0.0360746
ENSG00000267470	ZNF571-AS1	ZNF571 antisense RNA 1	14	4	0.272	-1.877	0.00225543	0.0424021
ENSG00000267680	ZNF224	zinc finger protein 224	850	617	0.726	-0.461	0.00112215	0.029802
ENSG00000268220	AC008040.5		188	127	0.674	-0.569	0.00173377	0.0371658
ENSG00000269086	AC008555.2		46	17	0.363	-1.462	0.000555546	0.0211807
ENSG00000269929	AL158152.1		146	71	0.49	-1.028	0.000428911	0.0186081
ENSG00000271916	AC012467.1		23	4	0.167	-2.579	0.000291949	0.0154535
ENSG00000272579	AL136370.1		66	40	0.599	-0.738	0.00202072	0.0399248
ENSG00000273247	AC097376.2		163	109	0.669	-0.579	0.00152534	0.0349331
ENSG00000274080	AC005089.1		130	87	0.665	-0.589	0.00160004	0.0356049
ENSG00000276434	AL136221.1		94	52	0.56	-0.837	0.00267276	0.046211
ENSG00000278311	GGNBP2	gametogenetin binding protein 2	2253	1714	0.761	-0.394	0.00109293	0.0296943
ENSG00000278991	AC090181.3		97	39	0.394	-1.342	1.72e-05	0.0028953
ENSG00000280138	AC027290.2		413	235	0.567	-0.817	1.8e-05	0.00299453
ENSG00000280347	AC000123.3		98	65	0.66	-0.599	0.00231729	0.0430699
ENSG00000281344	HELLPAR	HELLP associated long non-coding RNA	449	287	0.639	-0.646	0.000196949	0.0127324
ENSG00000281655	AP000851.2		30	2	0.062	-4.018	0.00187974	0.0387218
ENSG00000282508	LINC01002	long intergenic non-protein coding RNA 1002	51	21	0.416	-1.265	1.34e-05	0.00268271
